# Supplementary material for: Tunable synthesis of α,β-multifunctionalized azaheterocycles via the cascade reaction of saturated cyclic amines with diverse nucleophiles promoted by oxoammonium salt
Source: Royal Society of Chemistry journal article supplement (doi:10.1039/d2qo01427k), 2023-01-01
Supplement: d2qo01427k1.pdf [file d2qo01427k1.pdf]

## Supplementary Information

# Tunable synthesis of $\alpha,\beta$ -multifunctionalized azaheterocycles via the cascade reaction of saturated cyclic amines with diverse nucleophiles promoted by oxoammonium salt

Yan He,<sup>\*,[a]</sup> Qimeng Liu,<sup>[a]</sup> Tian Gong,<sup>[a]</sup> Yunfei Liu,<sup>[b]</sup> Xinying Zhang<sup>[a]</sup> and Xuesen Fan<sup>\*,[a]</sup>

<sup>[a]</sup>*NMPA Key Laboratory for Research and Evaluation of Innovative Drug, Key Laboratory for Yellow River and Huai River Water Environmental Pollution Control, Ministry of Education, Collaborative Innovation Center of Henan Province for Green Manufacturing of Fine Chemicals, School of Environment, School of Chemistry and Chemical Engineering, Henan Normal University, Xinxiang, Henan 453007, China.*

<sup>[b]</sup>*The 22nd Research Institute of China Electronics Technology Group Corporation, Xinxiang, Henan 453003, China.*

*E-mail: heyang@htu.cn; xuesen.fan@htu.cn*

## Contents

|             |                                                              |         |
|-------------|--------------------------------------------------------------|---------|
| <b>I</b>    | General experimental information                             | 2       |
| <b>II</b>   | Experimental procedures and spectroscopic data               | 3-27    |
| <b>III</b>  | Copies of the NMR spectra of <b>3a-3q</b>                    | 28-45   |
| <b>IV</b>   | Copies of the NMR spectra of <b>5a-5d</b>                    | 46-49   |
| <b>V</b>    | Copies of the NMR spectra of <b>7a</b> and <b>7b</b>         | 50-51   |
| <b>VI</b>   | Copies of the NMR spectra of <b>9a-9q</b>                    | 52-69   |
| <b>VII</b>  | Copies of the NMR spectra of <b>10-13</b> and <b>15</b>      | 70-76   |
| <b>VIII</b> | X-ray crystal structures and data of <b>7b</b> and <b>9a</b> | 77-80   |
| <b>IX</b>   | Details of DFT calculations                                  | 81-173  |
| <b>X</b>    | References                                                   | 174-175 |

## I. General Experimental Information

TEMPO salts were synthesized with a previously described procedure.<sup>1</sup> *N*-Aryl cyclic amines (**1**) were prepared based on a literature procedure.<sup>2</sup> Melting points were recorded with a micro melting point apparatus and uncorrected. The <sup>1</sup>H NMR spectra were recorded at 400 MHz or 600 MHz, and the <sup>13</sup>C NMR spectra were recorded at 100 MHz or 150 MHz. The <sup>19</sup>F NMR spectra were recorded at 376 MHz. Chemical shifts were expressed in parts per million ( $\delta$ ), and were reported as s (singlet), d (doublet), t (triplet), q (quadruplet), dd (doublet of doublet), td (doublet of triplet), m (multiplet), brs (broad singlet) etc. The coupling constants *J* were given in Hz. High-resolution mass spectra (HRMS) were performed on a microTOF mass spectrometer. All the reactions were monitored by thin-layer chromatography (TLC) using silica gel plates (silica gel 60 F254 0.25 mm), and components were visualized by observation under UV light (254 and 365 nm).

## II. Experimental Procedures and Spectroscopic Data

### 1. Optimization studies for the formation of **9a**<sup>a</sup>

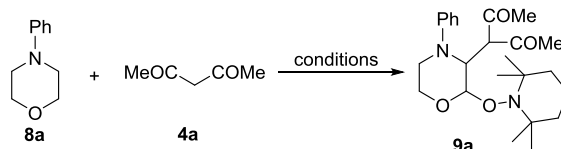

| entry           | oxoammonium salt (equiv)                         | additive (equiv)                       | solvent            | yield (%) <sup>b</sup> <b>9a</b> |
|-----------------|--------------------------------------------------|----------------------------------------|--------------------|----------------------------------|
| 1               | T <sup>+</sup> BF <sub>4</sub> <sup>-</sup> (2)  | CaCl <sub>2</sub> (0.5)                | EtOAc              | 39                               |
| 2               | T <sup>+</sup> BF <sub>4</sub> <sup>-</sup> (2)  | CaCl <sub>2</sub> (0.5)                | THF                | 41                               |
| 3               | T <sup>+</sup> BF <sub>4</sub> <sup>-</sup> (2)  | CaCl <sub>2</sub> (0.5)                | 1,4-dioxane        | 29                               |
| 4               | T <sup>+</sup> BF <sub>4</sub> <sup>-</sup> (2)  | CaCl <sub>2</sub> (0.5)                | DCM                | 38                               |
| 5               | T <sup>+</sup> BF <sub>4</sub> <sup>-</sup> (2)  | CaCl <sub>2</sub> (0.5)                | acetone            | 39                               |
| 6               | T <sup>+</sup> BF <sub>4</sub> <sup>-</sup> (2)  | CaCl <sub>2</sub> (0.5)                | CH <sub>3</sub> CN | 32                               |
| 7               | T <sup>+</sup> BF <sub>4</sub> <sup>-</sup> (2)  | CaCl <sub>2</sub> (0.5)                | DMF                | 24                               |
| 8               | T <sup>+</sup> ClO <sub>4</sub> <sup>-</sup> (2) | CaCl <sub>2</sub> (0.5)                | THF                | 38                               |
| 9               | T <sup>+</sup> OTf <sup>-</sup> (2)              | CaCl <sub>2</sub> (0.5)                | THF                | 34                               |
| 10              | T <sup>+</sup> PF <sub>6</sub> <sup>-</sup> (2)  | CaCl <sub>2</sub> (0.5)                | THF                | 25                               |
| 11              | T <sup>+</sup> BF <sub>4</sub> <sup>-</sup> (2)  | FeCl <sub>2</sub> (0.5)                | THF                | 49                               |
| 12              | T <sup>+</sup> BF <sub>4</sub> <sup>-</sup> (2)  | NaCl (1)                               | THF                | 48                               |
| 13              | T <sup>+</sup> BF <sub>4</sub> <sup>-</sup> (2)  | CaF <sub>2</sub> (0.5)                 | THF                | 50                               |
| 14              | T <sup>+</sup> BF <sub>4</sub> <sup>-</sup> (2)  | KF (1)                                 | THF                | 54                               |
| 15              | T <sup>+</sup> BF <sub>4</sub> <sup>-</sup> (2)  | CsF (1)                                | THF                | 65                               |
| 16              | T <sup>+</sup> BF <sub>4</sub> <sup>-</sup> (2)  | K <sub>2</sub> CO <sub>3</sub> (0.5)   | THF                | 53                               |
| 17              | T <sup>+</sup> BF <sub>4</sub> <sup>-</sup> (2)  | Na <sub>2</sub> CO <sub>3</sub> (0.5)  | THF                | 76                               |
| 18              | T <sup>+</sup> BF <sub>4</sub> <sup>-</sup> (2)  | Na <sub>2</sub> CO <sub>3</sub> (1)    | THF                | 73                               |
| 19              | T <sup>+</sup> BF <sub>4</sub> <sup>-</sup> (2)  | Na <sub>2</sub> CO <sub>3</sub> (0.25) | THF                | 75                               |
| 20              | T <sup>+</sup> BF <sub>4</sub> <sup>-</sup> (3)  | Na <sub>2</sub> CO <sub>3</sub> (0.5)  | THF                | 65                               |
| 21 <sup>c</sup> | T <sup>+</sup> BF <sub>4</sub> <sup>-</sup> (2)  | Na <sub>2</sub> CO <sub>3</sub> (0.5)  | THF                | 67                               |
| 22 <sup>d</sup> | T <sup>+</sup> BF <sub>4</sub> <sup>-</sup> (2)  | Na <sub>2</sub> CO <sub>3</sub> (0.5)  | THF                | 70                               |
| 23 <sup>e</sup> | T <sup>+</sup> BF <sub>4</sub> <sup>-</sup> (2)  | Na <sub>2</sub> CO <sub>3</sub> (0.5)  | THF                | 80                               |

<sup>a</sup> Reaction conditions: **8a** (0.2 mmol), **4a** (0.4 mmol), solvent (1 mL), rt, air, 1 h. <sup>b</sup> isolated yield. <sup>c</sup> under O<sub>2</sub>. <sup>d</sup> under N<sub>2</sub>. <sup>e</sup> 0.5 h.

### 2. A typical procedure for the synthesis of **3a** and the spectroscopic data of **3a-3q**

To a reaction tube equipped with a stir bar were added 1-(phenyl)piperidine (**1a**, 32 mg, 0.2 mmol), THF (1 mL), dimethyl malonate (**2a**, 46  $\mu$ L, 0.4 mmol), T<sup>+</sup>BF<sub>4</sub><sup>-</sup> (97 mg, 0.4 mmol), and CaCl<sub>2</sub> (11 mg, 0.1 mmol). The resulting mixture was then stirred at room temperature under air for 0.5 h. Upon completion, the mixture was diluted with ethyl acetate and aqueous NaCl. The organic layer was dried over anhydrous Na<sub>2</sub>SO<sub>4</sub> and filtered. Then, the solvent was evaporated under vacuum and the crude product was purified by column chromatography on silica-gel with petroleum ether/ethyl acetate (3:1) as the eluent to afford **3a** as yellow liquid in 37 mg (60%). **3b-3q** were obtained in an analogous manner.

**Dimethyl 2-(3-oxo-1-phenylpiperidin-2-yl)malonate (3a)**

Eluent: petroleum ether/ethyl acetate (3:1). Yellow liquid (37 mg, 60%).  $^1\text{H}$  NMR (400 MHz,  $\text{CDCl}_3$ ):  $\delta$  7.27 (t,  $J = 8.0$  Hz, 2H), 6.95 (d,  $J = 8.4$  Hz, 2H), 6.87 (t,  $J = 7.6$  Hz, 1H), 4.94 (d,  $J = 7.2$  Hz, 1H), 4.00 (d,  $J = 7.6$  Hz, 1H), 3.73 (s, 3H), 3.63 (s, 3H), 3.60-3.54 (m, 1H), 3.47-3.40 (m, 1H), 2.68-2.62 (m, 1H), 2.56-2.48 (m, 1H), 2.27-2.22 (m, 1H), 2.17-2.12 (m, 1H).  $^{13}\text{C}\{^1\text{H}\}$  NMR (150 MHz,  $\text{CDCl}_3$ ):  $\delta$  207.8, 167.7, 167.5, 148.1, 129.5, 120.0, 115.9, 66.5, 52.8, 52.7, 44.5, 37.1, 22.6. HRMS (ESI)  $m/z$ :  $[\text{M}+\text{Na}]^+$  Calcd for  $\text{C}_{16}\text{H}_{19}\text{NO}_5\text{Na}$  328.1155; Found 328.1152.

**Dimethyl 2-(1-(4-fluorophenyl)-3-oxopiperidin-2-yl)malonate (3b)**

Eluent: petroleum ether/ethyl acetate (3:1). Yellow liquid (47 mg, 72%).  $^1\text{H}$  NMR (400 MHz,  $\text{CDCl}_3$ ):  $\delta$  6.93-6.84 (m, 4H), 4.69 (d,  $J = 7.6$  Hz, 1H), 3.86 (d,  $J = 7.2$  Hz, 1H), 3.66 (s, 3H), 3.56 (s, 3H), 3.37-3.33 (m, 2H), 2.62-2.57 (m, 1H), 2.48-2.40 (m, 1H), 2.14-2.06 (m, 2H).  $^{13}\text{C}\{^1\text{H}\}$  NMR (150 MHz,  $\text{CDCl}_3$ ):  $\delta$  207.5, 167.55, 167.46, 157.6 (d,  $^1J_{\text{C-F}} = 238.4$  Hz), 144.8 (d,  $^4J_{\text{C-F}} = 2.1$  Hz), 119.1 (d,  $^3J_{\text{C-F}} = 7.7$  Hz), 115.9 (d,  $^2J_{\text{C-F}} = 21.9$  Hz), 67.3, 52.8, 52.74, 52.71, 46.6, 37.4, 23.0.  $^{19}\text{F}\{^1\text{H}\}$  NMR ( $\text{CDCl}_3$ , 376 MHz):  $\delta$  -123.1. HRMS (ESI)  $m/z$ :  $[\text{M}+\text{H}]^+$  Calcd for  $\text{C}_{16}\text{H}_{19}\text{FNO}_5$  324.1242; Found 324.1238.

**Dimethyl 2-(1-(4-chlorophenyl)-3-oxopiperidin-2-yl)malonate (3c)**

Eluent: petroleum ether/ethyl acetate (3:1). Yellow liquid (43 mg, 63%).  $^1\text{H}$  NMR (400 MHz,  $\text{CDCl}_3$ ):  $\delta$  7.24-7.20 (m, 2H), 6.90-6.86 (m, 2H), 4.88 (d,  $J = 7.6$  Hz, 1H), 3.97 (d,  $J = 7.2$  Hz, 1H), 3.73 (s, 3H), 3.64 (s, 3H), 3.56-3.50 (m, 1H), 3.45-3.38 (m, 1H), 2.69-2.62 (m, 1H), 2.55-2.48 (m, 1H), 2.27-2.21 (m, 1H), 2.17-2.12 (m, 1H).  $^{13}\text{C}\{^1\text{H}\}$  NMR (150 MHz,  $\text{CDCl}_3$ ):  $\delta$  207.4, 167.5, 167.3, 146.7, 129.3, 124.8, 116.9, 66.4, 52.9, 52.8, 52.7, 44.6, 37.0, 22.5. HRMS (ESI)  $m/z$ :  $[\text{M}+\text{H}]^+$  Calcd for  $\text{C}_{16}\text{H}_{19}\text{ClNO}_5$  340.0946; Found 340.0942.

**Dimethyl 2-(1-(4-iodophenyl)-3-oxopiperidin-2-yl)malonate (3d)**

Eluent: petroleum ether/ethyl acetate (3:1). Yellow liquid (52 mg, 60%).  $^1\text{H}$  NMR (400 MHz,  $\text{CDCl}_3$ ):  $\delta$  7.55-7.51 (m, 2H), 6.62 (dd,  $J_1 = 12.0$  Hz,  $J_2 = 3.2$  Hz, 2H), 4.90 (d,  $J = 7.2$  Hz, 1H), 3.97 (d,  $J = 7.6$  Hz, 1H), 3.73 (s, 3H), 3.64 (s, 3H), 3.57-3.51 (m, 1H), 3.43-3.37 (m, 1H), 2.68-2.61 (m, 1H), 2.55-2.47 (m, 1H), 2.27-2.22 (m, 1H), 2.17-2.12 (m, 1H).  $^{13}\text{C}\{^1\text{H}\}$  NMR (150 MHz,  $\text{CDCl}_3$ ):  $\delta$  207.3, 167.5, 167.3, 147.7, 138.1, 117.4, 81.4, 66.0, 52.91, 52.87, 52.7, 44.0, 36.8, 22.4. HRMS (ESI) m/z:  $[\text{M}+\text{H}]^+$  Calcd for  $\text{C}_{16}\text{H}_{19}\text{INO}_5$  432.0302; Found 432.0306.

**Dimethyl 2-(1-(4-(*tert*-butyl)phenyl)-3-oxopiperidin-2-yl)malonate (3e)**

Eluent: petroleum ether/ethyl acetate (3:1). Yellow liquid (30 mg, 42%).  $^1\text{H}$  NMR (400 MHz,  $\text{CDCl}_3$ ):  $\delta$  7.29 (d,  $J = 8.8$  Hz, 2H), 6.90 (d,  $J = 8.8$  Hz, 2H), 4.88 (d,  $J = 7.2$  Hz, 1H), 3.99 (d,  $J = 7.2$  Hz, 1H), 3.73 (s, 3H), 3.64 (s, 3H), 3.54-3.49 (m, 1H), 3.46-3.43 (m, 1H), 2.68-2.62 (m, 1H), 2.55-2.49 (m, 1H), 2.24-2.14 (m, 2H), 1.29 (s, 9H).  $^{13}\text{C}\{^1\text{H}\}$  NMR (150 MHz,  $\text{CDCl}_3$ ):  $\delta$  207.9, 167.8, 167.6, 145.7, 143.0, 126.3, 116.0, 66.7, 52.9, 52.74, 52.72, 45.0, 37.3, 34.0, 31.4, 22.7. HRMS (ESI) m/z:  $[\text{M}+\text{H}]^+$  Calcd for  $\text{C}_{20}\text{H}_{28}\text{NO}_5$  362.1962; Found 362.1954.

**Dimethyl 2-(3-oxo-1-(*p*-tolyl)piperidin-2-yl)malonate (3f)**

Eluent: petroleum ether/ethyl acetate (3:1). Yellow liquid (27 mg, 42%).  $^1\text{H}$  NMR (400 MHz,  $\text{CDCl}_3$ ):  $\delta$  7.08 (d,  $J = 8.4$  Hz, 2H), 6.87 (d,  $J = 8.4$  Hz, 2H), 4.83 (d,  $J = 7.2$  Hz, 1H), 3.97 (d,  $J = 7.6$  Hz, 1H), 3.73 (s, 3H), 3.64 (s, 3H), 3.50-3.38 (m, 2H), 2.68-2.62 (m, 1H), 2.54-2.47 (m, 1H), 2.31 (s, 3H), 2.27-2.11 (m, 2H).  $^{13}\text{C}\{^1\text{H}\}$  NMR (150 MHz,  $\text{CDCl}_3$ ):  $\delta$  208.0, 167.7, 167.6, 146.0, 130.03, 129.99, 117.1, 67.0, 52.8, 52.74, 52.71, 45.8, 37.4, 22.8, 20.4. HRMS (ESI) m/z:  $[\text{M}+\text{H}]^+$  Calcd for  $\text{C}_{17}\text{H}_{22}\text{NO}_5$  320.1492; Found 320.1496.

**Dimethyl 2-(3-oxo-1-(*m*-tolyl)piperidin-2-yl)malonate (3g)**

Eluent: petroleum ether/ethyl acetate (3:1). Yellow liquid (28 mg, 44%).  $^1\text{H}$  NMR (400 MHz,  $\text{CDCl}_3$ ):  $\delta$  7.16 (t,  $J = 7.6$  Hz, 1H), 7.14-6.75 (m, 2H), 6.70 (d,  $J = 7.2$  Hz, 1H), 4.92 (d,  $J = 7.6$  Hz,

1H), 4.00 (d,  $J = 7.6$  Hz, 1H), 3.73 (s, 3H), 3.64 (s, 3H), 3.59-3.53 (m, 1H), 3.45-3.39 (m, 1H), 2.67-2.62 (m, 1H), 2.55-2.48 (m, 1H), 2.32 (s, 3H), 2.31-2.11 (m, 2H).  $^{13}\text{C}\{^1\text{H}\}$  NMR (150 MHz,  $\text{CDCl}_3$ ):  $\delta$  208.0, 167.7, 167.5, 148.2, 139.3, 129.3, 120.9, 116.8, 113.1, 66.5, 52.82, 52.77, 52.74, 44.6, 37.1, 22.7, 21.8. HRMS (ESI)  $m/z$ :  $[\text{M}+\text{H}]^+$  Calcd for  $\text{C}_{17}\text{H}_{22}\text{NO}_5$  320.1492; Found 320.1494.

**Dimethyl 2-(3-oxo-1-(*o*-tolyl)piperidin-2-yl)malonate (3h)**

Eluent: petroleum ether/ethyl acetate (3:1). Yellow liquid (26 mg, 40%).  $^1\text{H}$  NMR (400 MHz,  $\text{CDCl}_3$ ):  $\delta$  7.21-7.13 (m, 3H), 7.08-7.04 (m, 1H), 4.54 (d,  $J = 6.4$  Hz, 1H), 3.69-3.65 (m, 7H), 3.19-3.15 (m, 1H), 3.05-2.99 (m, 1H), 2.81-2.75 (m, 1H), 2.56-2.47 (m, 1H), 2.19-2.14 (m, 4H), 2.00-1.95 (m, 1H).  $^{13}\text{C}\{^1\text{H}\}$  NMR (150 MHz,  $\text{CDCl}_3$ ):  $\delta$  207.4, 167.9, 167.8, 147.6, 135.4, 131.5, 126.8, 125.3, 122.4, 68.3, 52.8, 52.6, 52.5, 51.7, 38.7, 23.3, 17.3. HRMS (ESI)  $m/z$ :  $[\text{M}+\text{H}]^+$  Calcd for  $\text{C}_{17}\text{H}_{22}\text{NO}_5$  320.1492; Found 320.1497.

**Dimethyl 2-(1-(naphthalen-2-yl)-3-oxopiperidin-2-yl)malonate (3i)**

Eluent: petroleum ether/ethyl acetate (3:1). Yellow liquid (40 mg, 56%).  $^1\text{H}$  NMR (400 MHz,  $\text{CDCl}_3$ ):  $\delta$  7.76-7.68 (m, 3H), 7.43-7.39 (m, 1H), 7.32-7.20 (m, 2H), 7.19 (s, 1H), 5.08 (d,  $J = 7.6$  Hz, 1H), 4.08 (d,  $J = 7.6$  Hz, 1H), 3.75-3.67 (m, 4H), 3.59-3.55 (m, 4H), 2.71-2.65 (m, 1H), 2.60-2.54 (m, 1H), 2.31-2.29 (m, 1H), 2.20-1.18 (m, 1H).  $^{13}\text{C}\{^1\text{H}\}$  NMR (150 MHz,  $\text{CDCl}_3$ ):  $\delta$  207.8, 167.6, 167.4, 145.8, 134.5, 129.3, 128.5, 127.5, 126.7, 126.6, 123.7, 118.4, 110.9, 66.6, 52.85, 52.80, 52.77, 44.9, 37.1, 22.8. HRMS (ESI)  $m/z$ :  $[\text{M}+\text{H}]^+$  Calcd for  $\text{C}_{20}\text{H}_{22}\text{NO}_5$  356.1492; Found 356.1498.

**Dimethyl 2-(1-([1,1'-biphenyl]-4-yl)-3-oxopiperidin-2-yl)malonate (3j)**

Eluent: petroleum ether/ethyl acetate (3:1). Yellow liquid (48 mg, 63%).  $^1\text{H}$  NMR (400 MHz,  $\text{CDCl}_3$ ):  $\delta$  7.56-7.52 (m, 4H), 7.41 (t,  $J = 8.0$  Hz, 2H), 7.29 (t,  $J = 7.6$  Hz, 1H), 7.03-7.00 (m, 2H), 5.00 (d,  $J = 7.2$  Hz, 1H), 4.05 (d,  $J = 7.6$  Hz, 1H), 3.74 (s, 3H), 3.65-3.60 (m, 4H), 3.50-3.44 (m,

1H), 2.69-2.64 (m, 1H), 2.58-2.51 (m, 1H), 2.31-2.25 (m, 1H), 2.20-1.15 (m, 1H).  $^{13}\text{C}\{^1\text{H}\}$  NMR (150 MHz,  $\text{CDCl}_3$ ):  $\delta$  207.7, 167.7, 167.5, 147.3, 140.6, 132.5, 128.8, 128.1, 126.6, 126.5, 115.7, 66.3, 52.88, 52.86, 52.83, 44.3, 37.0, 22.6. HRMS (ESI)  $m/z$ :  $[\text{M}+\text{H}]^+$  Calcd for  $\text{C}_{22}\text{H}_{24}\text{NO}_5$  382.1649; Found 382.1644.

### **Diethyl-2-(1-([1,1'-biphenyl]-4-yl)-3-oxopiperidin-2-yl)malonate (3k)**

Eluent: petroleum ether/ethyl acetate (3:1). Yellow liquid (49 mg, 60%).  $^1\text{H}$  NMR (400 MHz,  $\text{CDCl}_3$ ):  $\delta$  7.53 (t,  $J = 8.4$  Hz, 4H), 7.39 (t,  $J = 7.6$  Hz, 2H), 7.29-7.24 (m, 1H), 7.02 (d,  $J = 8.8$  Hz, 2H), 5.01 (d,  $J = 7.6$  Hz, 1H), 4.25-4.01 (m, 5H), 3.64-3.60 (m, 1H), 3.51-3.45 (m, 1H), 2.68-2.50 (m, 2H), 2.29-2.14 (m, 2H), 1.26 (t,  $J = 7.2$  Hz, 3H), 1.17 (t,  $J = 7.2$  Hz, 3H).  $^{13}\text{C}\{^1\text{H}\}$  NMR (150 MHz,  $\text{CDCl}_3$ ):  $\delta$  207.8, 167.3, 167.1, 147.5, 140.7, 132.3, 128.8, 128.0, 126.6, 126.5, 115.6, 66.3, 61.9, 53.3, 44.1, 37.1, 22.8, 14.0, 13.9. HRMS (ESI)  $m/z$ :  $[\text{M}+\text{H}]^+$  Calcd for  $\text{C}_{24}\text{H}_{28}\text{NO}_5$  410.1962; Found 410.1955.

### **Di-*tert*-butyl-2-(3-oxo-1-(*p*-tolyl)piperidin-2-yl)malonate (3l)**

Eluent: petroleum ether/ethyl acetate (3:1). Yellow liquid (44 mg, 54%).  $^1\text{H}$  NMR (400 MHz,  $\text{CDCl}_3$ ):  $\delta$  7.06 (d,  $J = 8.4$  Hz, 2H), 6.86 (d,  $J = 8.8$  Hz, 2H), 4.78 (d,  $J = 8.0$  Hz, 1H), 3.80 (d,  $J = 8.0$  Hz, 1H), 3.55-3.50 (m, 1H), 3.45-3.42 (m, 1H), 2.66-2.61 (m, 1H), 2.51-2.45 (m, 1H), 2.26-2.20 (m, 4H), 2.12-2.11 (m, 1H), 1.45 (s, 9H), 1.35 (s, 9H).  $^{13}\text{C}\{^1\text{H}\}$  NMR (150 MHz,  $\text{CDCl}_3$ ):  $\delta$  208.4, 166.6, 166.3, 146.4, 129.8, 129.1, 116.4, 82.1, 66.8, 55.3, 44.9, 37.4, 27.9, 27.7, 23.5, 20.4. HRMS (ESI)  $m/z$ :  $[\text{M}+\text{H}]^+$  Calcd for  $\text{C}_{23}\text{H}_{34}\text{NO}_5$  404.2431; Found 404.2436.

### **1,2-Diphenylpiperidin-3-one (3m)**

Eluent: petroleum ether/ethyl acetate (10:1). Yellow liquid (21 mg, 42%).  $^1\text{H}$  NMR (400 MHz,  $\text{CDCl}_3$ ):  $\delta$  7.34-7.31 (m, 4H), 7.29-7.20 (m, 3H), 6.79-6.76 (m, 3H), 5.33 (s, 1H), 3.73-3.66 (m, 2H), 2.60-2.54 (m, 1H), 2.48-2.44 (m, 1H), 2.14-2.06 (m, 2H).  $^{13}\text{C}\{^1\text{H}\}$  NMR (150 MHz,  $\text{CDCl}_3$ ):  $\delta$

206.3, 148.5, 136.9, 129.4, 128.9, 127.7, 126.2, 118.1, 113.0, 69.2, 44.3, 36.9, 21.2. HRMS (ESI) m/z: [M+H]<sup>+</sup> Calcd for C<sub>17</sub>H<sub>18</sub>NO 252.1383; Found 252.1393.

### **2-(4-Methoxyphenyl)-1-phenylpiperidin-3-one (3n)**

Eluent: petroleum ether/ethyl acetate (10:1). Yellow liquid (34 mg, 60%). <sup>1</sup>H NMR (400 MHz, CDCl<sub>3</sub>): δ 7.25-7.20 (m, 4H), 6.85 (dd, *J*<sub>1</sub> = 8.8 Hz, *J*<sub>2</sub> = 3.2 Hz, 2H), 6.79-6.75 (m, 3H), 5.26 (s, 1H), 3.78 (s, 3H), 3.71-3.63 (m, 2H), 2.61-2.54 (m, 1H), 2.45-2.37 (m, 1H), 2.13-2.06 (m, 2H). <sup>13</sup>C{<sup>1</sup>H} NMR (150 MHz, CDCl<sub>3</sub>): δ 206.6, 159.2, 148.6, 129.4, 128.6, 127.4, 118.0, 114.4, 113.1, 68.7, 55.3, 44.2, 36.8, 21.2. HRMS (ESI) m/z: [M+H]<sup>+</sup> Calcd for C<sub>18</sub>H<sub>20</sub>NO<sub>2</sub> 282.1489; Found 282.1491.

### **2-Allyl-1-(4-chlorophenyl)piperidin-3-one (3o)**

Eluent: petroleum ether/ethyl acetate (5:1). Yellow liquid (21 mg, 43%). <sup>1</sup>H NMR (400 MHz, CDCl<sub>3</sub>): δ 7.21-7.17 (m, 2H), 6.78-6.75 (m, 2H), 5.75-5.65 (m, 1H), 5.07-5.02 (m, 2H), 4.20 (t, *J* = 7.2 Hz, 1H), 3.53-3.37 (m, 2H), 2.56-2.45 (m, 4H), 2.16-2.08 (m, 2H). <sup>13</sup>C{<sup>1</sup>H} NMR (150 MHz, CDCl<sub>3</sub>): δ 208.4, 147.5, 133.4, 129.2, 123.7, 118.1, 116.3, 67.1, 42.9, 36.9, 34.0, 22.8. HRMS (ESI) m/z: [M+H]<sup>+</sup> Calcd for C<sub>14</sub>H<sub>17</sub>ClNO 250.0993; Found 250.0997.

### **1-(4-((((3a*R*,5*R*,6*R*,6a*R*)-5-((*R*)-2,2-dimethyl-1,3-dioxolan-4-yl)-2,2-dimethyltetrahydrofuro[2,3-*d*][1,3]dioxol-6-yl)oxy)methyl)phenyl)-2-(4-methoxyphenyl)piperidin-3-one (3p)**

Eluent: petroleum ether/ethyl acetate (2:1). Yellow liquid (50 mg, 45%). <sup>1</sup>H NMR (400 MHz, CDCl<sub>3</sub>): δ 7.23 (d, *J* = 7.6 Hz, 2H), 7.18 (d, *J* = 8.4 Hz, 2H), 6.86 (d, *J* = 8.8 Hz, 2H), 6.73 (d, *J* = 8.4 Hz, 2H), 5.75 (d, *J* = 3.2 Hz, 1H), 5.28 (s, 1H), 4.69-4.57 (m, 3H), 4.37 (d, *J* = 11.6 Hz, 1H), 4.13-3.97 (m, 3H), 3.78 (s, 3H), 3.73-3.64 (m, 2H), 3.53-3.49 (m, 1H), 2.61-2.55 (m, 1H), 2.46-2.42 (m, 1H), 2.14-2.10 (m, 2H), 1.62 (s, 3H), 1.42 (s, 3H), 1.34 (s, 6H). <sup>13</sup>C{<sup>1</sup>H} NMR (150 MHz, CDCl<sub>3</sub>): δ 206.23, 206.20, 159.3, 148.51, 148.49, 129.67, 129.66, 128.45, 128.41, 127.35, 127.33,



126.22, 126.19, 114.4, 113.9, 112.82, 112.80, 108.5, 105.0, 82.7, 78.1, 76.54, 76.49, 75.5, 72.23, 72.21, 68.7, 67.1, 55.3, 44.3, 36.7, 26.9, 26.8, 26.4, 25.2, 21.02, 21.01. HRMS (ESI)  $m/z$ :  $[M+H]^+$  Calcd for  $C_{31}H_{40}NO_8$  554.2748; Found 554.2740.

**1-(4-((((1*S*,2*R*,5*S*)-2-Isopropyl-5-methylcyclohexyl)oxy)methyl)phenyl)-2-(4-methoxyphenyl)piperidin-3-one (3q)**

Eluent: petroleum ether/ethyl acetate (5:1). Yellow liquid (37 mg, 41%).  $^1H$  NMR (400 MHz,  $CDCl_3$ ):  $\delta$  7.20 (t,  $J = 8.4$  Hz, 4H), 6.84 (dd,  $J_1 = 8.4$  Hz,  $J_2 = 0.8$  Hz, 2H), 6.72 (d,  $J = 8.8$  Hz, 2H), 5.25 (s, 1H), 4.53 (d,  $J = 10.8$  Hz, 1H), 4.28 (d,  $J = 10.8$  Hz, 1H), 3.77 (s, 3H), 3.70-3.63 (m, 2H), 3.16-3.10 (m, 1H), 2.59-2.53 (m, 1H), 2.46-2.37 (m, 1H), 2.27-2.24 (m, 1H), 2.18-2.05 (m, 3H), 1.66-1.59 (m, 3H), 1.36-1.21 (m, 3H), 0.94-0.86 (m, 7H), 0.68 (d,  $J = 6.8$  Hz, 3H).  $^{13}C\{^1H\}$  NMR (150 MHz,  $CDCl_3$ ):  $\delta$  206.5, 159.2, 148.1, 129.5, 128.61, 128.57, 127.4, 114.3, 113.05, 113.02, 78.34, 78.29, 70.22, 70.19, 68.7, 55.3, 48.3, 44.4, 40.4, 36.8, 34.6, 31.6, 25.49, 25.47, 23.31, 23.29, 22.4, 21.3, 21.0, 16.07, 16.06. HRMS (ESI)  $m/z$ :  $[M+H]^+$  Calcd for  $C_{29}H_{40}NO_3$  450.3003; Found 450.2996.

**3. A typical procedure for the synthesis of 5a and the spectroscopic data of 5a-5d**

To a reaction tube equipped with a stir bar were added 1-(4-iodophenyl)piperidine (**1d**, 57 mg, 0.2 mmol), THF (1 mL), pentane-2,4-dione (**4a**, 41  $\mu$ L, 0.4 mmol),  $T^+BF_4^-$  (97 mg, 0.4 mmol), and  $CaCl_2$  (11 mg, 0.1 mmol). The resulting mixture was then stirred at room temperature under air for 0.5 h. Upon completion, the mixture was diluted with ethyl acetate and aqueous NaCl. The organic layer was dried over anhydrous  $Na_2SO_4$  and filtered. Then, the solvent was evaporated under vacuum and the crude product was purified by column chromatography on silica-gel with petroleum ether/ethyl acetate (3:1) as the eluent to afford **5a** as yellow solid in 56 mg (73%). **5b-5d** were obtained in an analogous manner.

**7-Acetyl-1-(4-iodophenyl)-1,2,3,4,7,7a-hexahydro-6H-cyclopenta[b]pyridin-6-one (5a)**

Eluent: petroleum ether/ethyl acetate (3:1). Yellow solid (56 mg, 73%), mp 127-128 °C. <sup>1</sup>H NMR (400 MHz, CDCl<sub>3</sub>): δ 8.24 (s, 1H), 7.39 (dd, *J*<sub>1</sub> = 12.0 Hz, *J*<sub>2</sub> = 3.2 Hz, 2H), 6.29 (dd, *J*<sub>1</sub> = 12.0 Hz, *J*<sub>2</sub> = 3.2 Hz, 2H), 3.55-3.41 (m, 2H), 3.15 (d, *J* = 18.4 Hz, 1H), 2.56-2.51 (m, 4H), 2.31-1.87 (m, 4H). <sup>13</sup>C{<sup>1</sup>H} NMR (150 MHz, CDCl<sub>3</sub>): δ 200.3, 193.7, 176.5, 144.9, 142.3, 138.0, 114.7, 78.5, 66.8, 50.1, 46.7, 42.1, 29.9, 23.4. HRMS (ESI) *m/z*: [M+H]<sup>+</sup> Calcd for C<sub>16</sub>H<sub>17</sub>INO<sub>2</sub> 382.0298; Found 382.0288.

**7-Acetyl-1-(2-bromophenyl)-1,2,3,4,7,7a-hexahydro-6H-cyclopenta[b]pyridin-6-one (5b)**

Eluent: petroleum ether/ethyl acetate (3:1). Yellow liquid (37 mg, 56%). <sup>1</sup>H NMR (400 MHz, CDCl<sub>3</sub>): δ 8.36 (s, 1H), 7.58 (dd, *J*<sub>1</sub> = 8.0 Hz, *J*<sub>2</sub> = 1.2 Hz, 1H), 7.23-7.18 (m, 1H), 7.10 (dd, *J*<sub>1</sub> = 8.0 Hz, *J*<sub>2</sub> = 1.2 Hz, 1H), 7.04-7.00 (m, 1H), 3.68-3.62 (m, 1H), 3.42-3.37 (m, 1H), 2.74 (d, *J* = 18.4 Hz, 1H), 2.54 (d, *J* = 18.4 Hz, 1H), 2.40 (s, 3H), 2.26-2.11 (m, 4H). <sup>13</sup>C{<sup>1</sup>H} NMR (150 MHz, CDCl<sub>3</sub>): δ 202.2, 194.5, 172.8, 143.6, 141.2, 134.2, 130.1, 128.3, 127.5, 125.5, 69.1, 52.4, 47.3, 39.4, 29.8, 23.6. HRMS (ESI) *m/z*: [M+H]<sup>+</sup> Calcd for C<sub>16</sub>H<sub>17</sub>BrNO<sub>2</sub> 334.0437; Found 334.0432.

**Ethyl-6-oxo-1-phenyl-2,3,4,6,7,7a-hexahydro-1H-cyclopenta[b]pyridine-7-carboxylate (5c)**

Eluent: petroleum ether/ethyl acetate (3:1). Yellow liquid (25 mg, 44%). <sup>1</sup>H NMR (400 MHz, CDCl<sub>3</sub>): δ 8.32 (s, 1H), 7.17 (t, *J* = 7.6 Hz, 2H), 6.73 (t, *J* = 7.6 Hz, 1H), 6.54 (d, *J* = 8.4 Hz, 2H), 4.31 (q, *J* = 7.2 Hz, 2H), 3.57-3.48 (m, 2H), 3.22 (d, *J* = 18.4 Hz, 1H), 2.51 (d, *J* = 18.0 Hz, 1H), 2.31-1.87 (m, 4H), 1.35 (t, *J* = 7.2 Hz, 3H). <sup>13</sup>C{<sup>1</sup>H} NMR (150 MHz, CDCl<sub>3</sub>): δ 198.9, 177.9, 161.2, 145.3, 135.5, 129.5, 117.4, 112.5, 66.9, 61.3, 50.0, 46.4, 42.0, 23.4, 14.2. HRMS (ESI) *m/z*: [M+H]<sup>+</sup> Calcd for C<sub>17</sub>H<sub>20</sub>NO<sub>3</sub> 286.1438; Found 286.1430.

**Ethyl 1-(4-bromophenyl)-6-oxo-2,3,4,6,7,7a-hexahydro-1H-cyclopenta[b]pyridine-7-carboxylate (5d)**

Eluent: petroleum ether/ethyl acetate (3:1). Yellow liquid (55 mg, 76%).  $^1\text{H}$  NMR (400 MHz,  $\text{CDCl}_3$ ):  $\delta$  8.26 (s, 1H), 7.26-7.22 (m, 2H), 6.43-6.39 (m, 2H), 4.32 (q,  $J = 7.2$  Hz, 2H), 3.56-3.42 (m, 2H), 3.14 (d,  $J = 18.4$  Hz, 1H), 2.52 (d,  $J = 18.4$  Hz, 1H), 2.30-1.88 (m, 4H), 1.35 (t,  $J = 7.2$  Hz, 3H).  $^{13}\text{C}\{^1\text{H}\}$  NMR (150 MHz,  $\text{CDCl}_3$ ):  $\delta$  198.5, 177.1, 161.1, 144.3, 135.9, 132.1, 114.0, 109.4, 66.9, 61.4, 50.2, 46.3, 42.0, 23.4, 14.2. HRMS (ESI)  $m/z$ :  $[\text{M}+\text{H}]^+$  Calcd for  $\text{C}_{17}\text{H}_{19}\text{BrNO}_3$  364.0543; Found 364.0539.

#### 4. A typical procedure for the synthesis of **5a** and the spectroscopic data of **7a-7b**

To a reaction tube equipped with a stir bar were added 1-(phenyl)piperidine (**1a**, 32 mg, 0.2 mmol), THF/ $\text{H}_2\text{O}$  (19/1, 1 mL), malononitrile (**6a**, 25  $\mu\text{L}$ , 0.4 mmol),  $\text{T}^+\text{BF}_4^-$  (97 mg, 0.4 mmol), and  $\text{CaCl}_2$  (11 mg, 0.1 mmol). The resulting mixture was then stirred at room temperature under air for 1 h. Upon completion, the mixture was diluted with ethyl acetate and aqueous NaCl. The organic layer was dried over anhydrous  $\text{Na}_2\text{SO}_4$  and filtered. Then, the solvent was evaporated under vacuum and the crude product was purified by column chromatography on silica-gel with dichloromethane/methanol (20:1) as the eluent to afford **7a** as yellow solid in 27 mg (53%, 5:1 dr).

**7b** was obtained in an analogous manner.

#### **7a-Hydroxy-2-oxo-4-phenyloctahydro-1H-pyrrolo[3,2-b]pyridine-3-carbonitrile (7a)**

Eluent: dichloromethane/methanol (20:1). Yellow solid (27 mg, 53%, 5:1 dr), mp 94-95  $^\circ\text{C}$ .  $^1\text{H}$  NMR (400 MHz,  $\text{CDCl}_3$ ):  $\delta$  7.31 (t,  $J = 8.4$  Hz, 2H), 7.04-6.97 (m, 3H), 5.29 (s, 1H), 4.48 (d,  $J = 5.2$  Hz, 1H), 4.24 (br s, 1H), 3.40 (d,  $J = 5.2$  Hz, 1H), 3.22-3.19 (m, 2H), 2.01-1.70 (m, 4H).  $^{13}\text{C}\{^1\text{H}\}$  NMR (150 MHz,  $\text{CDCl}_3$ ):  $\delta$  167.2, 148.7, 129.7, 129.6, 122.2, 118.7, 116.3, 115.1, 86.2, 66.8, 47.0, 37.3, 33.5, 20.4. HRMS (ESI)  $m/z$ :  $[\text{M}+\text{H}]^+$  Calcd for  $\text{C}_{14}\text{H}_{16}\text{N}_3\text{O}_2$  258.1237; Found 258.1237.

#### **7a-Hydroxy-2-oxo-4-(p-tolyl)octahydro-1H-pyrrolo[3,2-b]pyridine-3-carbonitrile (7b)**

Eluent: dichloromethane/methanol (20:1). Yellow solid (22 mg, 40%, 9:1 dr), mp 148-149 °C.  $^1\text{H}$  NMR (400 MHz, acetone- $d_6$ ):  $\delta$  7.95 (br s, 1H), 7.09 (d,  $J = 8.4$  Hz, 2H), 6.99 (d,  $J = 8.4$  Hz, 2H), 5.46 (s, 1H), 4.56 (d,  $J = 7.2$  Hz, 1H), 3.74 (d,  $J = 7.2$  Hz, 1H), 3.30 (t,  $J = 6.0$  Hz, 2H), 2.24 (s, 3H), 2.09-1.99 (m, 2H), 1.87-1.83 (m, 1H), 1.71-1.68 (m, 1H).  $^{13}\text{C}\{^1\text{H}\}$  NMR (150 MHz,  $\text{CDCl}_3$ ):  $\delta$  165.0, 147.4, 129.7, 117.8, 116.7, 114.4, 84.8, 67.4, 45.1, 36.1, 33.8, 20.3, 19.6. HRMS (ESI)  $m/z$ :  $[\text{M}+\text{H}]^+$  Calcd for  $\text{C}_{15}\text{H}_{18}\text{N}_3\text{O}_2$  272.1394; Found 272.1385.

### 5. A typical procedure for the synthesis of **9a** and the spectroscopic data of **9a-9q**

To a reaction tube equipped with a stir bar were added 4-phenylmorpholine (**8a**, 33 mg, 0.2 mmol), THF (1 mL), pentane-2,4-dione (**4a**, 41  $\mu\text{L}$ , 0.4 mmol),  $\text{T}^+\text{BF}_4^-$  (97 mg, 0.4 mmol), and  $\text{Na}_2\text{CO}_3$  (11 mg, 0.1 mmol). The resulting mixture was then stirred at room temperature under air for 0.5 h. Upon completion, the mixture was diluted with ethyl acetate and aqueous NaCl. The organic layer was dried over anhydrous  $\text{Na}_2\text{SO}_4$  and filtered. Then, the solvent was evaporated under vacuum and the crude product was purified by column chromatography on silica-gel with petroleum ether/ethyl acetate (3:1) as the eluent to afford **9a** as white solid in 67 mg (80%, >20:1 dr). **9b-9q** were obtained in an analogous manner.

### 3-(4-Phenyl-2-((2,2,6,6-tetramethylpiperidin-1-yl)oxy)morpholin-3-yl)pentane-2,4-dione (**9a**)

Eluent: petroleum ether/ethyl acetate (3:1). White solid (67 mg, 80%, >20:1 dr), mp 119-120 °C.  $^1\text{H}$  NMR (400 MHz,  $\text{CDCl}_3$ ):  $\delta$  7.24-7.20 (m, 2H), 6.95 (d,  $J = 8.0$  Hz, 2H), 6.78 (t,  $J = 7.2$  Hz, 1H), 4.94 (d,  $J = 10.8$  Hz, 1H), 4.69 (d,  $J = 11.2$  Hz, 1H), 4.59 (s, 1H), 4.27-4.22 (m, 1H), 3.60-3.53 (m, 2H), 3.35-3.32 (m, 1H), 2.21(s, 3H), 1.92 (s, 3H), 1.45-1.42 (m, 5H), 1.28-1.14 (m, 8H), 0.95-0.94 (m, 5H).  $^{13}\text{C}\{^1\text{H}\}$  NMR (150 MHz,  $\text{CDCl}_3$ ):  $\delta$  201.9, 201.3, 150.0, 129.2, 119.1, 116.4, 101.7, 69.3, 60.5, 59.3, 58.2, 57.7, 41.8, 40.8, 40.1, 33.84, 33.77, 31.3, 27.3, 20.6, 19.9, 17.0. HRMS (ESI)  $m/z$ :  $[\text{M}+\text{H}]^+$  Calcd for  $\text{C}_{24}\text{H}_{37}\text{N}_2\text{O}_4$  417.2748; Found 417.2776.

**3-(4-(4-(Tert-butyl)phenyl)-2-((2,2,6,6-tetramethylpiperidin-1-yl)oxy)morpholin-3-yl)pentane-2,4-dione (9b)**

Eluent: petroleum ether/ethyl acetate (3:1). Yellow syrup (68 mg, 72%, >20:1 dr).  $^1\text{H}$  NMR (400 MHz,  $\text{CDCl}_3$ ):  $\delta$  7.24 (dd,  $J_1 = 6.8$  Hz,  $J_2 = 2.0$  Hz, 2H), 6.89 (d,  $J = 8.8$  Hz, 2H), 4.88 (d,  $J = 10.8$  Hz, 1H), 4.69 (d,  $J = 10.8$  Hz, 1H), 4.57 (s, 1H), 4.28-4.27 (m, 1H), 3.58-3.51 (m, 2H), 3.30-3.27 (m, 1H), 2.21 (s, 3H), 1.94 (s, 3H), 1.44-0.88 (m, 27H).  $^{13}\text{C}\{^1\text{H}\}$  NMR (150 MHz,  $\text{CDCl}_3$ ):  $\delta$  202.1, 201.5, 147.9, 142.2, 125.9, 116.5, 101.8, 69.4, 60.5, 59.3, 59.0, 57.6, 41.8, 40.8, 40.1, 33.9, 33.8, 31.4, 31.2, 27.2, 20.6, 19.8, 17.0. HRMS (ESI)  $m/z$ :  $[\text{M}+\text{H}]^+$  Calcd for  $\text{C}_{28}\text{H}_{45}\text{N}_2\text{O}_4$  473.3374; Found 473.3387.

**3-(4-(4-Fluorophenyl)-2-((2,2,6,6-tetramethylpiperidin-1-yl)oxy)morpholin-3-yl)pentane-2,4-dione (9c)**

Eluent: petroleum ether/ethyl acetate (3:1). Yellow solid (71 mg, 82%, >20:1 dr), mp 124-125 °C.  $^1\text{H}$  NMR (400 MHz,  $\text{CDCl}_3$ ):  $\delta$  6.94-6.90 (m, 4H), 4.80 (d,  $J = 10.8$  Hz, 1H), 4.68 (d,  $J = 11.2$  Hz, 1H), 4.59 (s, 1H), 4.28-4.22 (m, 1H), 3.62-3.53 (m, 2H), 3.26-3.23 (m, 1H), 2.22 (s, 3H), 1.95 (s, 3H), 1.46-1.43 (m, 5H), 1.26-1.15 (m, 7H), 0.98-0.93 (m, 6H).  $^{13}\text{C}\{^1\text{H}\}$  NMR (150 MHz,  $\text{CDCl}_3$ ):  $\delta$  201.8, 201.3, 156.6 (d,  $^1J_{\text{C-F}} = 236.3$  Hz), 146.7 (d,  $^4J_{\text{C-F}} = 2.1$  Hz), 118.0 (d,  $^3J_{\text{C-F}} = 7.7$  Hz), 115.6 (d,  $^2J_{\text{C-F}} = 21.9$  Hz), 101.7, 69.1, 60.5, 59.3, 59.1, 57.5, 42.4, 40.8, 40.1, 33.8, 33.7, 31.3, 27.6, 20.6, 19.9, 17.0.  $^{19}\text{F}\{^1\text{H}\}$  NMR (376 MHz,  $\text{CDCl}_3$ ):  $\delta$  -125.2. HRMS (ESI)  $m/z$ :  $[\text{M}+\text{H}]^+$  Calcd for  $\text{C}_{24}\text{H}_{36}\text{FN}_2\text{O}_4$  435.2654; Found 435.2672.

**3-(4-(4-Bromophenyl)-2-((2,2,6,6-tetramethylpiperidin-1-yl)oxy)morpholin-3-yl)pentane-2,4-dione (9d)**

Eluent: petroleum ether/ethyl acetate (3:1). Yellow syrup (75 mg, 76%, >20:1 dr).  $^1\text{H}$  NMR (400 MHz,  $\text{CDCl}_3$ ):  $\delta$  7.33-7.29 (m, 2H), 6.86-6.82 (m, 2H), 4.86 (d,  $J = 11.2$  Hz, 1H), 4.66 (d,  $J = 10.8$

Hz, 1H), 4.60 (s, 1H), 4.25-4.18 (m, 1H), 3.59-3.52 (m, 2H), 3.32-3.28 (m, 1H), 2.22 (s, 3H), 1.95 (s, 3H), 1.46-0.96 (m, 18H).  $^{13}\text{C}\{^1\text{H}\}$  NMR (150 MHz,  $\text{CDCl}_3$ ):  $\delta$  201.6, 201.1, 149.1, 132.0, 117.8, 111.0, 101.6, 69.1, 60.5, 59.3, 58.0, 57.6, 42.1, 40.8, 40.1, 33.81, 33.76, 31.2, 27.6, 20.6, 19.9, 16.9. HRMS (ESI)  $m/z$ :  $[\text{M}+\text{H}]^+$  Calcd for  $\text{C}_{24}\text{H}_{36}\text{BrN}_2\text{O}_4$  495.1853; Found 495.1852.

**3-(2-((2,2,6,6-Tetramethylpiperidin-1-yl)oxy)-4-(4-(trifluoromethyl)phenyl)morpholin-3-yl)pentane-2,4-dione (9e)**

Eluent: petroleum ether/ethyl acetate (3:1). Yellow solid (77 mg, 80%, >20:1 dr), mp 154-155 °C.  $^1\text{H}$  NMR (400 MHz,  $\text{CDCl}_3$ ):  $\delta$  7.47 (d,  $J = 8.8$  Hz, 2H), 6.99 (d,  $J = 8.8$  Hz, 2H), 5.00 (d,  $J = 11.2$  Hz, 1H), 4.69 (d,  $J = 10.8$  Hz, 1H), 4.63 (s, 1H), 4.26-4.20 (m, 1H), 3.62-3.56 (m, 2H), 3.45-3.41 (m, 1H), 2.24 (s, 3H), 1.98 (s, 3H), 1.45-0.91 (m, 18H).  $^{13}\text{C}\{^1\text{H}\}$  NMR (150 MHz,  $\text{CDCl}_3$ ):  $\delta$  201.4, 200.9, 152.4, 126.6 (q,  $^4J_{\text{C-F}} = 3.3$  Hz), 124.7 (q,  $^1J_{\text{C-F}} = 269.1$  Hz), 120.4 (q,  $^2J_{\text{C-F}} = 32.7$  Hz), 115.0, 101.6, 68.9, 60.6, 59.4, 57.7, 41.8, 40.8, 40.1, 33.8, 31.2, 27.7, 20.5, 19.7, 16.9.  $^{19}\text{F}\{^1\text{H}\}$  NMR (376 MHz,  $\text{CDCl}_3$ ):  $\delta$  -61.4. HRMS (ESI)  $m/z$ :  $[\text{M}+\text{H}]^+$  Calcd for  $\text{C}_{25}\text{H}_{36}\text{F}_3\text{N}_2\text{O}_4$  485.2622; Found 485.2612.

**3-(4-([1,1'-Biphenyl]-4-yl)-2-((2,2,6,6-tetramethylpiperidin-1-yl)oxy)morpholin-3-yl)pentane-2,4-dione (9f)**

Eluent: petroleum ether/ethyl acetate (3:1). Yellow syrup (66 mg, 67%, >20:1 dr).  $^1\text{H}$  NMR (400 MHz,  $\text{CDCl}_3$ ):  $\delta$  7.56-7.47 (m, 4H), 7.39 (t,  $J = 8.0$  Hz, 2H), 7.27 (t,  $J = 7.6$  Hz, 1H), 7.04-7.01 (m, 2H), 4.98 (d,  $J = 10.8$  Hz, 1H), 4.70 (d,  $J = 11.2$  Hz, 1H), 4.62 (s, 1H), 4.30-4.24 (m, 1H), 3.64-3.38 (m, 3H), 2.23 (s, 3H), 1.97 (s, 3H), 1.59-0.86 (m, 18H).  $^{13}\text{C}\{^1\text{H}\}$  NMR (150 MHz,  $\text{CDCl}_3$ ):  $\delta$  201.9, 201.4, 149.4, 140.8, 131.8, 128.8, 128.7, 127.8, 126.4, 116.5, 101.7, 69.4, 60.6, 59.4, 58.1, 57.8, 42.0, 40.8, 40.2, 33.8, 31.3, 27.4, 20.6, 19.9, 17.0. HRMS (ESI)  $m/z$ :  $[\text{M}+\text{H}]^+$  Calcd for  $\text{C}_{30}\text{H}_{41}\text{N}_2\text{O}_4$  493.3061; Found 493.3067.

**3-(4-(3-Nitrophenyl)-2-((2,2,6,6-tetramethylpiperidin-1-yl)oxy)morpholin-3-yl)pentane-2,4-dione (9g)**

Eluent: petroleum ether/ethyl acetate (2:1). Orange solid (55 mg, 60%, >20:1 dr), mp 126-127 °C.

<sup>1</sup>H NMR (400 MHz, CDCl<sub>3</sub>): δ 7.76 (t, *J* = 2.4 Hz, 1H), 7.62 (dd, *J*<sub>1</sub> = 8.0 Hz, *J*<sub>2</sub> = 1.2 Hz, 1H), 7.38 (t, *J* = 8.0 Hz, 1H), 7.30-7.27 (m, 1H), 4.97 (d, *J* = 11.2 Hz, 1H), 4.71 (d, *J* = 11.2 Hz, 1H), 4.65 (s, 1H), 4.27-4.24 (m, 1H), 3.63-3.60 (m, 2H), 3.49-3.45 (m, 1H), 2.26 (s, 3H), 2.04 (s, 3H), 1.44-0.85 (m, 18H). <sup>13</sup>C{<sup>1</sup>H} NMR (150 MHz, CDCl<sub>3</sub>): δ 201.1, 200.7, 150.9, 149.3, 129.9, 121.7, 113.6, 109.6, 101.6, 68.7, 60.6, 59.4, 58.2, 57.4, 42.0, 40.7, 40.1, 33.8, 31.2, 28.0, 20.5, 19.6, 16.9.

HRMS (ESI) *m/z*: [M+H]<sup>+</sup> Calcd for C<sub>24</sub>H<sub>36</sub>N<sub>3</sub>O<sub>6</sub> 462.2599; Found 462.2602.

**3-(2-((2,2,6,6-Tetramethylpiperidin-1-yl)oxy)-4-(*m*-tolyl)morpholin-3-yl)pentane-2,4-dione (9h)**

Eluent: petroleum ether/ethyl acetate (3:1). Yellow syrup (65 mg, 75%, >20:1 dr). <sup>1</sup>H NMR (400 MHz, CDCl<sub>3</sub>): δ 7.10 (t, *J* = 8.0 Hz, 1H), 6.80 (s, 1H), 6.75 (dd, *J*<sub>1</sub> = 8.0 Hz, *J*<sub>2</sub> = 2.4 Hz, 1H), 6.61 (d, *J* = 7.2 Hz, 1H), 4.92 (d, *J* = 10.8 Hz, 1H), 4.68 (d, *J* = 11.2 Hz, 1H), 4.59 (s, 1H), 4.25-4.19 (m, 1H), 3.59-3.50 (m, 2H), 3.34-3.31 (m, 1H), 2.33-2.29 (m, 3H), 2.21 (s, 3H), 1.92 (s, 3H), 1.68-0.96 (m, 18H). <sup>13</sup>C{<sup>1</sup>H} NMR (150 MHz, CDCl<sub>3</sub>): δ 202.0, 201.4, 150.1, 138.9, 129.0, 120.0, 117.2, 113.6, 101.7, 69.6, 60.5, 59.3, 57.8, 57.7, 42.2, 40.8, 40.2, 33.8, 33.7, 31.3, 27.1, 21.8, 20.6, 19.9, 17.0. HRMS (ESI) *m/z*: [M+H]<sup>+</sup> Calcd for C<sub>25</sub>H<sub>39</sub>N<sub>2</sub>O<sub>4</sub> 431.2904; Found 431.2916.

**Ethyl 3-oxo-2-(4-phenyl-2-((2,2,6,6-tetramethylpiperidin-1-yl)oxy)morpholin-3-yl)butanoate (9i)**

Eluent: petroleum ether/ethyl acetate (3:1). Yellow syrup (71 mg, 80%, >20:1 dr). <sup>1</sup>H NMR (400 MHz, CDCl<sub>3</sub>): δ 7.21-7.17 (m, 2H), 6.90 (d, *J* = 8.0 Hz, 2H), 6.73 (t, *J* = 7.2 Hz, 1H), 4.85 (d, *J* = 10.8 Hz, 1H), 4.76 (s, 1H), 4.44 (d, *J* = 11.2 Hz, 1H), 4.34-4.27 (m, 1H), 3.91-3.87 (m, 1H),

3.68-3.59 (m, 3H), 3.35-3.32 (m, 1H), 2.21 (s, 3H), 1.45-0.87 (m, 21H).  $^{13}\text{C}\{^1\text{H}\}$  NMR (150 MHz,  $\text{CDCl}_3$ ):  $\delta$  200.5, 167.1, 150.4, 128.9, 118.6, 115.9, 102.0, 61.6, 59.9, 58.26, 58.23, 41.3, 40.8, 40.2, 34.0, 33.8, 29.9, 20.6, 19.7, 17.0, 13.7. HRMS (ESI)  $m/z$ :  $[\text{M}+\text{H}]^+$  Calcd for  $\text{C}_{25}\text{H}_{39}\text{N}_2\text{O}_5$  447.2853; Found 447.2846.

**Dimethyl 2-(4-phenyl-2-((2,2,6,6-tetramethylpiperidin-1-yl)oxy)morpholin-3-yl)malonate (9j)**

Eluent: petroleum ether/ethyl acetate (3:1). Yellow liquid (64 mg, 71%, >20:1 dr).  $^1\text{H}$  NMR (400 MHz,  $\text{CDCl}_3$ ):  $\delta$  7.21 (t,  $J = 8.0$  Hz, 2H), 6.80 (d,  $J = 8.8$  Hz, 2H), 6.77-6.73 (m, 1H), 4.93 (s, 1H), 4.84 (d,  $J = 10.8$  Hz, 1H), 4.33-4.27 (m, 2H), 3.71 (s, 3H), 3.66-3.60 (m, 2H), 3.31-3.26 (m, 4H), 1.47-0.93 (m, 18H).  $^{13}\text{C}\{^1\text{H}\}$  NMR (100 MHz,  $\text{CDCl}_3$ ):  $\delta$  167.9, 167.3, 150.1, 129.0, 118.8, 116.0, 101.7, 60.5, 59.4, 58.8, 58.3, 52.6, 52.1, 51.4, 41.1, 40.8, 40.2, 34.0, 33.8, 20.6, 19.8, 17.0. HRMS (ESI)  $m/z$ :  $[\text{M}+\text{H}]^+$  Calcd for  $\text{C}_{24}\text{H}_{37}\text{N}_2\text{O}_6$  449.2646; Found 449.2634.

**2-(4-(4-Chlorophenyl)-2-((2,2,6,6-tetramethylpiperidin-1-yl)oxy)morpholin-3-yl)-1-phenylbutane-1,3-dione (9k)**

Eluent: petroleum ether/ethyl acetate (3:1). Yellow syrup (60 mg, 59%, >20:1 dr).  $^1\text{H}$  NMR (400 MHz,  $\text{CDCl}_3$ ):  $\delta$  7.92 (d,  $J = 7.6$  Hz, 2H), 7.57 (t,  $J = 7.2$  Hz, 1H), 7.45 (t,  $J = 7.2$  Hz, 2H), 7.05 (d,  $J = 8.8$  Hz, 2H), 6.72 (d,  $J = 8.8$  Hz, 2H), 5.53 (d,  $J = 10.8$  Hz, 1H), 4.99 (d,  $J = 10.4$  Hz, 1H), 4.86 (s, 1H), 4.32-4.27 (m, 1H), 3.59-3.55 (m, 1H), 3.40-3.33 (m, 1H), 3.14-3.11 (m, 1H), 2.23 (s, 3H), 1.51-0.76 (m, 18H).  $^{13}\text{C}\{^1\text{H}\}$  NMR (150 MHz,  $\text{CDCl}_3$ ):  $\delta$  200.8, 193.8, 149.4, 137.1, 133.8, 129.1, 128.7, 128.6, 123.7, 117.3, 102.2, 61.6, 60.7, 60.5, 59.4, 57.7, 41.8, 40.8, 40.2, 33.8, 30.4, 27.0, 20.6, 19.5, 17.0. HRMS (ESI)  $m/z$ :  $[\text{M}+\text{H}]^+$  Calcd for  $\text{C}_{29}\text{H}_{38}\text{ClN}_2\text{O}_4$  513.2515; Found 513.2516.

**3-(Nitromethyl)-2-((2,2,6,6-tetramethylpiperidin-1-yl)oxy)-4-(*p*-tolyl)morpholine (9l)**

Eluent: petroleum ether/ethyl acetate (5:1). Yellow liquid (34 mg, 44%, >20:1 dr).  $^1\text{H}$  NMR (400 MHz,  $\text{CDCl}_3$ ):  $\delta$  7.11 (d,  $J = 8.4$  Hz, 2H), 6.84 (d,  $J = 8.4$  Hz, 2H), 5.07 (s, 1H), 4.72-4.70 (m, 2H),



4.47-4.42 (m, 1H), 4.31-4.28 (m, 1H), 3.76-3.71 (m, 1H), 3.21-3.16 (m, 2H), 2.28 (s, 3H), 1.50-1.14 (m, 18H).  $^{13}\text{C}\{^1\text{H}\}$  NMR (150 MHz,  $\text{CDCl}_3$ ):  $\delta$  146.2, 130.2, 115.9, 101.1, 72.7, 60.6, 59.5, 59.0, 57.6, 42.2, 40.6, 40.0, 33.8, 33.6, 20.8, 20.4, 20.2, 17.0. HRMS (ESI)  $m/z$ :  $[\text{M}+\text{H}]^+$  Calcd for  $\text{C}_{21}\text{H}_{34}\text{N}_3\text{O}_4$  392.2544; Found 392.2539.

### **3-(4-Methoxyphenyl)-4-phenyl-2-((2,2,6,6-tetramethylpiperidin-1-yl)oxy)morpholine (9m)**

Eluent: petroleum ether/ethyl acetate (5:1). Yellow liquid (42 mg, 50%, >20:1 dr).  $^1\text{H}$  NMR (400 MHz,  $\text{CDCl}_3$ ):  $\delta$  7.29 (d,  $J = 8.8$  Hz, 2H), 7.23-7.17 (m, 2H), 6.80-6.75 (m, 5H), 5.29 (d,  $J = 2.4$  Hz, 1H), 4.81 (d,  $J = 2.0$  Hz, 1H), 4.20-4.16 (m, 1H), 3.96-3.93 (m, 1H), 3.75 (s, 3H), 3.43-3.40 (m, 2H), 1.51-1.44 (m, 5H), 1.32-1.27 (m, 4H), 1.11 (br s, 6H), 0.99 (br s, 3H).  $^{13}\text{C}\{^1\text{H}\}$  NMR (150 MHz,  $\text{CDCl}_3$ ):  $\delta$  158.7, 150.4, 131.2, 129.1, 128.8, 118.9, 115.9, 113.7, 105.2, 62.7, 61.6, 60.6, 59.4, 55.3, 44.4, 40.5, 40.1, 34.2, 33.8, 20.8, 20.1, 17.2. HRMS (ESI)  $m/z$ :  $[\text{M}+\text{H}]^+$  Calcd for  $\text{C}_{26}\text{H}_{37}\text{N}_2\text{O}_3$  425.2799; Found 425.2790.

### **3-Allyl-4-phenyl-2-((2,2,6,6-tetramethylpiperidin-1-yl)oxy)morpholine (9n)**

Eluent: petroleum ether/ethyl acetate (5:1). Yellow solid (39 mg, 54%, >20:1 dr), mp 73-74 °C.  $^1\text{H}$  NMR (400 MHz,  $\text{CDCl}_3$ ):  $\delta$  7.28-7.23 (m, 2H), 6.85 (d,  $J = 8.0$  Hz, 2H), 6.81-6.78 (m, 1H), 5.76-5.66 (m, 1H), 5.10-5.01 (m, 2H), 4.98 (s, 1H), 4.28-4.22 (m, 1H), 4.05-4.01 (m, 1H), 3.74-3.70 (m, 1H), 3.31-3.17 (m, 2H), 2.52-2.44 (m, 1H), 2.24-2.18 (m, 1H), 1.50-1.13 (m, 18H).  $^{13}\text{C}\{^1\text{H}\}$  NMR (150 MHz,  $\text{CDCl}_3$ ):  $\delta$  150.0, 135.0, 129.3, 118.6, 117.9, 115.1, 102.0, 60.4, 59.3, 59.2, 58.5, 41.3, 40.6, 40.1, 34.3, 33.9, 31.8, 20.8, 20.2, 17.1. HRMS (ESI)  $m/z$ :  $[\text{M}+\text{H}]^+$  Calcd for  $\text{C}_{22}\text{H}_{35}\text{N}_2\text{O}_2$  359.2693; Found 359.2689.

### **3-(2-((4-Methoxy-2,2,6,6-tetramethylpiperidin-1-yl)oxy)-4-phenylmorpholin-3-yl)pentane-2,4-dione (9o)**

Eluent: petroleum ether/ethyl acetate (2:1). Yellow liquid (75 mg, 84%).  $^1\text{H}$  NMR (400 MHz,

CDCl<sub>3</sub>):  $\delta$  7.22 (t,  $J$  = 7.6 Hz, 2H), 6.94 (d,  $J$  = 8.0 Hz, 2H), 6.78 (t,  $J$  = 7.2 Hz, 1H), 4.93 (d,  $J$  = 11.2 Hz, 1H), 4.68 (d,  $J$  = 10.8 Hz, 1H), 4.59 (s, 1H), 4.28-4.21 (m, 1H), 4.61-3.54 (m, 2H), 3.40-3.29 (m, 5H), 2.21 (s, 3H), 1.93 (s, 3H), 1.87-1.84 (m, 2H), 1.38-1.19 (m, 8H), 1.01 (s, 3H), 1.98 (s, 3H). <sup>13</sup>C{<sup>1</sup>H} NMR (150 MHz, CDCl<sub>3</sub>):  $\delta$  201.9, 201.3, 150.0, 129.2, 119.2, 116.3, 101.8, 71.4, 69.2, 60.9, 59.6, 58.3, 57.8, 55.8, 45.5, 44.8, 41.7, 34.0, 33.9, 31.2, 27.4, 21.6, 20.9. HRMS (ESI) m/z: [M+H]<sup>+</sup> Calcd for C<sub>25</sub>H<sub>39</sub>N<sub>2</sub>O<sub>5</sub> 447.2853; Found 447.2852.

**3-(4-Phenyl-2-((2,2,6,6-tetramethyl-4-oxopiperidin-1-yl)oxy)morpholin-3-yl)pentane-2,4-dione (9p)**

Eluent: petroleum ether/ethyl acetate (2:1). Yellow solid (60 mg, 70%), mp 133-134 °C. <sup>1</sup>H NMR (400 MHz, CDCl<sub>3</sub>):  $\delta$  7.22 (t,  $J$  = 7.6 Hz, 2H), 6.94 (d,  $J$  = 7.6 Hz, 2H), 6.79 (t,  $J$  = 7.2 Hz, 1H), 4.96 (d,  $J$  = 10.8 Hz, 1H), 4.71 (s, 1H), 4.69 (d,  $J$  = 10.8 Hz, 1H), 4.26-4.23 (m, 1H), 3.64-3.56 (m, 2H), 3.40-3.36 (m, 1H), 2.61-2.53 (m, 2H), 2.24 (s, 3H), 2.19-2.12 (m, 2H), 1.97 (s, 3H), 1.40 (s, 3H), 1.29 (s, 3H), 1.01 (s, 3H), 0.95 (s, 3H). <sup>13</sup>C{<sup>1</sup>H} NMR (150 MHz, CDCl<sub>3</sub>):  $\delta$  207.5, 201.9, 201.1, 149.9, 129.3, 119.5, 116.3, 102.2, 69.1, 63.6, 62.5, 58.2, 57.9, 54.1, 53.6, 41.7, 33.7, 33.5, 31.1, 27.6, 22.4, 21.4. HRMS (ESI) m/z: [M+H]<sup>+</sup> Calcd for C<sub>24</sub>H<sub>35</sub>N<sub>2</sub>O<sub>5</sub> 431.2540; Found 431.2521.

**3-(2-((4-Hydroxy-2,2,6,6-tetramethylpiperidin-1-yl)oxy)-4-phenylmorpholin-3-yl)pentane-2,4-dione (9q)**

Eluent: petroleum ether/ethyl acetate (1:1). Yellow liquid (67 mg, 77%). <sup>1</sup>H NMR (400 MHz, CDCl<sub>3</sub>):  $\delta$  7.22 (t,  $J$  = 7.6 Hz, 2H), 6.94 (d,  $J$  = 8.0 Hz, 2H), 6.78 (t,  $J$  = 7.2 Hz, 1H), 4.93 (d,  $J$  = 11.2 Hz, 1H), 4.68 (d,  $J$  = 10.8 Hz, 1H), 4.59 (s, 1H), 4.28-4.22 (m, 1H), 4.14-4.09 (m, 1H), 3.61-3.54 (m, 2H), 3.36-3.33 (m, 1H), 2.22 (s, 3H), 2.03 (s, 1H), 1.94 (s, 3H), 1.88-1.78 (m, 2H), 1.45-1.39 (m, 2H), 1.27 (s, 3H), 1.18 (s, 3H), 1.00 (s, 3H), 0.97 (s, 3H). <sup>13</sup>C{<sup>1</sup>H} NMR (150 MHz,

CDCl<sub>3</sub>):  $\delta$  202.0, 201.3, 149.9, 129.2, 119.3, 116.3, 101.8, 69.2, 62.8, 61.0, 59.7, 58.4, 57.7, 49.1, 48.4, 41.7, 33.9, 33.8, 31.2, 27.4, 21.5, 20.8. HRMS (ESI) m/z: [M+H]<sup>+</sup> Calcd for C<sub>24</sub>H<sub>37</sub>N<sub>2</sub>O<sub>5</sub> 433.2697; Found 433.2695.

## 6. Control Experiments

**6.1.** To a reaction tube equipped with a stir bar were added 1-(phenyl)piperidine (**1a**, 32 mg, 0.2 mmol), THF (1 mL), dimethyl malonate (**2a**, 46  $\mu$ L, 0.4 mmol), T<sup>+</sup>BF<sub>4</sub><sup>-</sup> (97 mg, 0.4 mmol), CaCl<sub>2</sub> (11 mg, 0.1 mmol), and BHT (44 mg, 0.4 mmol). The resulting mixture was then stirred at room temperature under air for 0.5 h. Upon completion, the mixture was diluted with ethyl acetate and aqueous NaCl. The organic layer was dried over anhydrous Na<sub>2</sub>SO<sub>4</sub> and filtered. Then, the solvent was evaporated under vacuum and the crude product was purified by column chromatography on silica-gel with petroleum ether/ethyl acetate (3:1) as the eluent to afford **3a** as yellow liquid in 34 mg (56%).

**6.2.** To a reaction tube equipped with a stir bar were added 4-phenylmorpholine (**8a**, 33 mg, 0.2 mmol), THF (1 mL), pentane-2,4-dione (**4a**, 41  $\mu$ L, 0.4 mmol), T<sup>+</sup>BF<sub>4</sub><sup>-</sup> (97 mg, 0.4 mmol), Na<sub>2</sub>CO<sub>3</sub> (11 mg, 0.1 mmol), and BHT (44 mg, 0.4 mmol). The resulting mixture was then stirred at room temperature under air for 0.5 h. Upon completion, the mixture was diluted with ethyl acetate and aqueous NaCl. The organic layer was dried over anhydrous Na<sub>2</sub>SO<sub>4</sub> and filtered. Then, the solvent was evaporated under vacuum and the crude product was purified by column chromatography on silica-gel with petroleum ether/ethyl acetate (3:1) as the eluent to afford **9a** as white solid in 61 mg (73%).

**6.3.** To a reaction tube equipped with a stir bar were added 1-(phenyl)piperidine (**1a**, 32 mg, 0.2 mmol), THF (1 mL), dimethyl malonate (**2a**, 46  $\mu$ L, 0.4 mmol), T<sup>+</sup>BF<sub>4</sub><sup>-</sup> (97 mg, 0.4 mmol), and CaCl<sub>2</sub> (11 mg, 0.1 mmol). The resulting mixture was then stirred at room temperature under air for

5 min. Subsequent HRMS analysis of the mixture showed that 5-oxo-1-phenyl-2,3,4,5-tetrahydropyridin-1-ium (**i**, Calc'd, 174.0913, Found, 174.0913) was formed (Fig. S1).

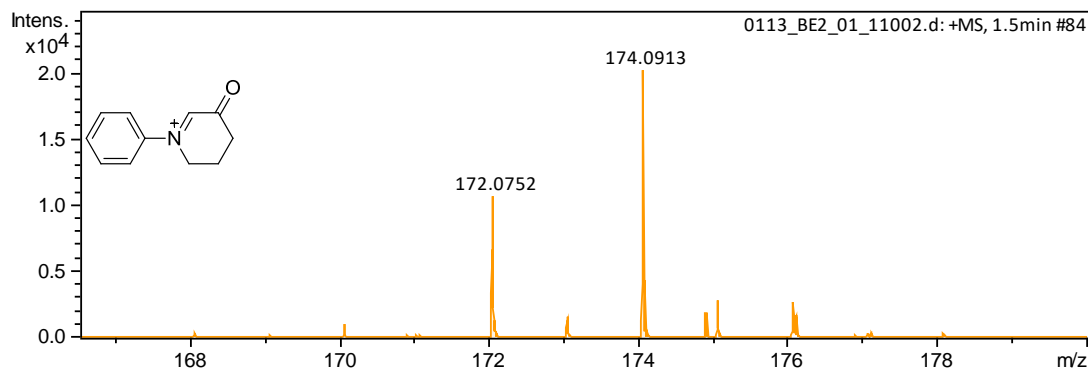

**Fig. S1** Copy of HRMS Spectrum of the Reaction Mixture for the Formation of **3a**

**6.4.** To a reaction tube equipped with a stir bar were added 4-phenylmorpholine (**8a**, 33 mg, 0.2 mmol), THF (1 mL), pentane-2,4-dione (**4a**, 41  $\mu$ L, 0.4 mmol), T<sup>+</sup>BF<sub>4</sub><sup>-</sup> (97 mg, 0.4 mmol), and Na<sub>2</sub>CO<sub>3</sub> (11 mg, 0.1 mmol). The resulting mixture was then stirred at room temperature under air for 5 min. Subsequent HRMS analysis of the mixture showed that 6-oxo-4-phenyl-3,6-dihydro-2*H*-1,4-oxazin-4-ium was not formed, but 4-phenyl-6-((2,2,6,6-tetramethylpiperidin-1-yl)oxy)-3,6-dihydro-2*H*-1,4-oxazin-4-ium (**ii**, Calc'd, 317.2224, Found, 317.2217) was formed (Fig. S2).

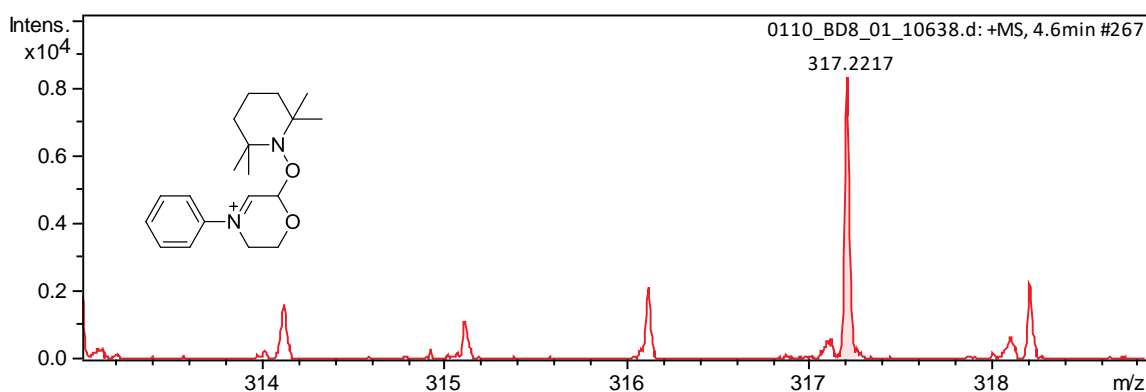

**Fig. S2** Copy of HRMS Spectrum of the Reaction Mixture for the Formation of **9a**

**6.5.** To a reaction tube equipped with a stir bar were added 1-(phenyl)piperidine (**1a**, 32 mg, 0.2

mmol), THF (1 mL), dimethyl malonate (**2a**, 46  $\mu$ L, 0.4 mmol), TEMP<sup>18</sup>O<sup>+</sup>BF<sub>4</sub><sup>-</sup> (98 mg, 0.4 mmol, 88%) (Fig. S3), and CaCl<sub>2</sub> (11 mg, 0.1 mmol). The resulting mixture was then stirred at room temperature under air for 0.5 h. Subsequent HRMS analysis of the mixture showed that [<sup>18</sup>O]-**3a** and [<sup>16</sup>O]-**3a** were formed in a ratio of 7.9:1 (Fig. S4). Meanwhile, the mixture was diluted with ethyl acetate and aqueous NaCl. The organic layer was dried over anhydrous Na<sub>2</sub>SO<sub>4</sub> and filtered. Then, the solvent was evaporated under vacuum and the crude product was purified by column chromatography on silica-gel with petroleum ether/ethyl acetate (3:1) as the eluent to afford [<sup>18</sup>O]-**3a** in 33 mg (54%).

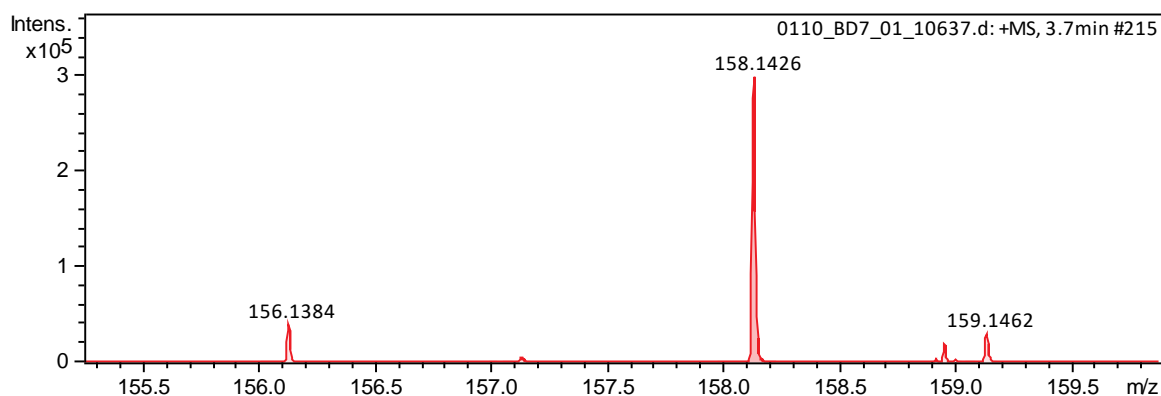

| m/z      | Res.  | S/N    | I      | I%   | FWHM   |
|----------|-------|--------|--------|------|--------|
| 156.1384 | 10866 | 298.9  | 38763  | 9.9  | 0.0144 |
| 158.1426 | 10576 | 2263.5 | 295842 | 75.8 | 0.0150 |

**Fig. S3 Copy of HRMS Spectrum of the Mixture of TEMP<sup>18</sup>O<sup>+</sup>/TEMP<sup>16</sup>O<sup>+</sup>**

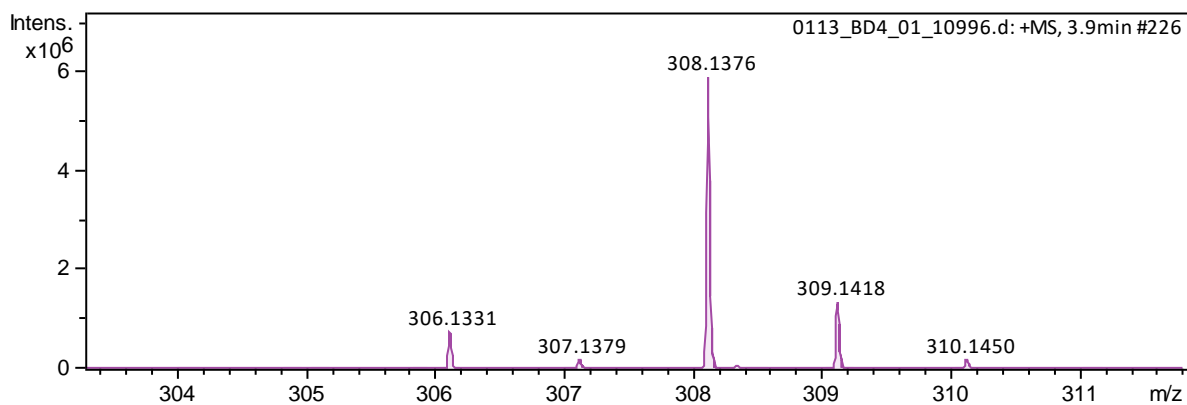

| m/z      | Res.  | S/N     | I       | I%   | FWHM   |
|----------|-------|---------|---------|------|--------|
| 306.1331 | 11747 | 5686.4  | 5686.4  | 12.6 | 0.0261 |
| 308.1376 | 11585 | 44718.9 | 44718.9 | 100  | 0.0266 |

**Fig. S4 Copy of HRMS Spectrum of the Mixture of [<sup>16</sup>O]-**3a**/[<sup>18</sup>O]-**3a****

**6.6.** To a reaction tube equipped with a stir bar were added 4-phenylmorpholine (**8a**, 33 mg, 0.2 mmol), THF (1 mL), pentane-2,4-dione (**4a**, 41  $\mu$ L, 0.4 mmol), TEMP<sup>18</sup>O<sup>+</sup>BF<sub>4</sub><sup>-</sup> (98 mg, 0.4 mmol, 88%) (Fig. S2), and Na<sub>2</sub>CO<sub>3</sub> (11 mg, 0.1 mmol). The resulting mixture was then stirred at room temperature under air for 0.5 h. Subsequent HRMS analysis of the mixture showed that [<sup>18</sup>O]-**9a** and [<sup>16</sup>O]-**9a** were formed in a ratio of 7:1 (Fig. S5). Meanwhile, the mixture was diluted with ethyl acetate and aqueous NaCl. The organic layer was dried over anhydrous Na<sub>2</sub>SO<sub>4</sub> and filtered. Then, the solvent was evaporated under vacuum and the crude product was purified by column chromatography on silica-gel with petroleum ether/ethyl acetate (3:1) as the eluent to afford [<sup>18</sup>O]-**9a** in 59 mg (71%).

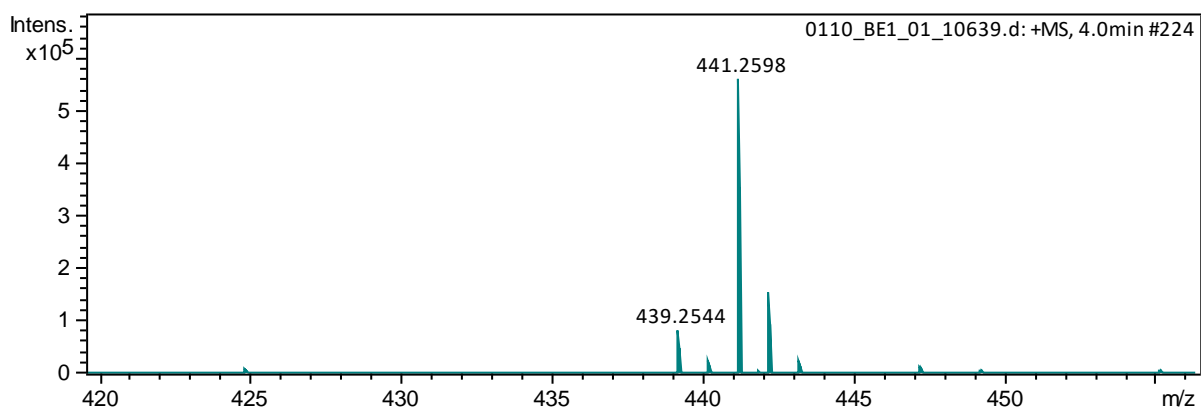

| m/z      | Res.  | S/N    | I      | I%  | FWHM   |
|----------|-------|--------|--------|-----|--------|
| 439.2544 | 11511 | 568.3  | 81864  | 0.9 | 0.0382 |
| 441.2598 | 12057 | 3867.8 | 556272 | 6.3 | 0.0366 |

Fig. S5 Copy of HRMS Spectrum of the Mixture of [ $^{16}\text{O}$ ]-9a/[ $^{18}\text{O}$ ]-9a

## 7. Possible mechanisms.

### 7.1 Possible mechanisms for the synthesis of 3, 5 and 7<sup>3</sup>.

$\text{Nu}^-$  from:  $\text{ArBF}_3\text{K}$ , allyltrimethylsilane, or dimethyl malonate

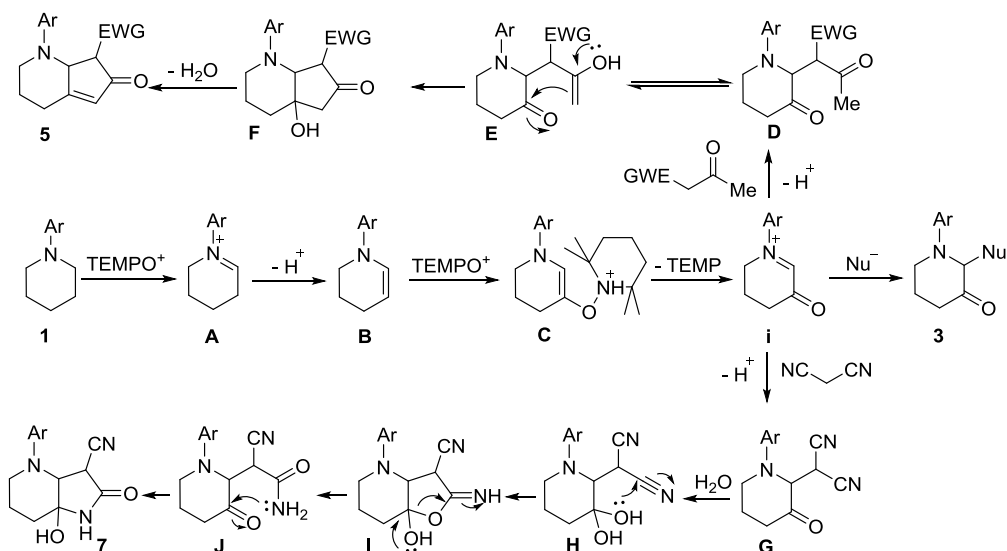

### 7.2 Possible mechanism for the synthesis of 9.

$\text{Nu}^-$  from: active methylene compounds, nitromethane,  $\text{ArBF}_3\text{K}$ , or allyltrimethylsilane

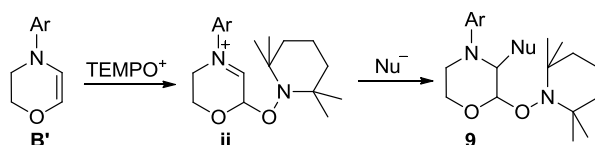

## 8. Synthetic and pharmaceutical application.

**8.1.** To a reaction tube equipped with a stir bar were added 2-(4-methoxyphenyl)-1-phenylpiperidin-3-one (**3n**, 28 mg, 0.1 mmol), EtOAc (2 mL), and *t*BuONO (26  $\mu$ L, 0.2 mmol, 90%). The resulting mixture was then stirred at rt for 12 h. Then the mixture was evaporated under vacuum and the crude product was purified by column chromatography on silica-gel with petroleum ether/ethyl acetate (5:1) as the eluent to afford **10** as yellow liquid in 21 mg (64%).

### *N*-(5-(4-Methoxyphenyl)-4,5-dioxopentyl)-*N*-phenylnitrous amide (**10**)

Eluent: petroleum ether/ethyl acetate (5:1). Yellow liquid (21 mg, 64%).  $^1\text{H}$  NMR (400 MHz,  $\text{CDCl}_3$ ):  $\delta$  8.00 (dd,  $J_1 = 6.8$  Hz,  $J_2 = 2.0$  Hz, 2H), 7.61 (dd,  $J_1 = 7.2$  Hz,  $J_2 = 1.6$  Hz, 2H), 7.51-7.47 (m, 2H), 7.39-7.35 (m, 1H), 6.97 (dd,  $J_1 = 7.2$  Hz,  $J_2 = 1.6$  Hz, 2H), 4.16-4.12 (m, 2H), 3.89 (s, 3H), 2.88 (t,  $J = 6.8$  Hz, 2H), 1.99-1.96 (m, 2H).  $^{13}\text{C}\{^1\text{H}\}$  NMR (150 MHz,  $\text{CDCl}_3$ ):  $\delta$  202.1, 190.1, 165.0, 141.4, 132.9, 129.7, 127.5, 124.7, 119.4, 114.3, 55.6, 42.6, 35.6, 20.0. HRMS (ESI)  $m/z$ :  $[\text{M}+\text{H}]^+$  Calcd for  $\text{C}_{18}\text{H}_{19}\text{N}_2\text{O}_4$  327.1339; Found 327.1341.

**8.2.** To a reaction tube equipped with a stir bar were added 3-(4-methoxyphenyl)-4-phenyl-2-((2,2,6,6-tetramethylpiperidin-1-yl)oxy)morpholine (**9m**, 64 mg, 0.15 mmol), THF (2 mL),  $\text{H}_2\text{O}$  (3 mL), AcOH (2 mL), and Zn (96 mg, 1.5 mmol). The resulting mixture was then stirred at rt for 1 h. Next, Zn (96 mg, 1.5 mmol) was added to the mixture and the resulting mixture stirred at 70  $^\circ\text{C}$  for another 2 h. Then, the mixture was diluted with ethyl acetate and aqueous NaOH (4M). The organic layer was dried over anhydrous  $\text{Na}_2\text{SO}_4$  and filtered. Then, the solvent was evaporated under vacuum and the crude product was purified by column chromatography on silica-gel with petroleum ether/ethyl acetate (2:1) as the eluent to afford **11** as yellow liquid in 24 mg (56%).



### **3-(4-Methoxyphenyl)-4-phenylmorpholin-2-ol (11)**

Eluent: petroleum ether/ethyl acetate (2:1). Yellow liquid (24 mg, 56%, mixture of diastereomers).

$^1\text{H}$  NMR (400 MHz,  $\text{CDCl}_3$ ):  $\delta$  7.25-7.15 (m, 4H), 6.90-6.87 (m, 3H), 6.76-6.74 (m, 2H), 5.20-5.14 (m, 1H), 4.35-4.34 (m, 1H), 4.20-3.88 (m, 2H), 3.72 (s, 3H), 3.42-3.07 (m, 3H).  $^{13}\text{C}\{^1\text{H}\}$  NMR (100 MHz,  $\text{CDCl}_3$ ):  $\delta$  158.9, 150.5, 130.7, 129.8, 129.0, 121.5, 120.1, 119.4, 113.8, 113.5, 95.3, 65.8, 61.7, 55.1, 47.6. HRMS (ESI)  $m/z$ :  $[\text{M}+\text{H}]^+$  Calcd for  $\text{C}_{17}\text{H}_{20}\text{NO}_3$  286.1438; Found 286.1438.

**8.3.** To a reaction tube equipped with a stir bar were added 1,2-diphenylpiperidin-3-one (**3m**, 50 mg, 0.2 mmol), MeOH (2 mL), and  $\text{NaBH}_4$  (11 mg, 0.3 mmol). The resulting mixture was then stirred at 0 °C for 20 min. Then the mixture was quenched by aqueous  $\text{NH}_4\text{Cl}$  and diluted by ethyl acetate and aqueous NaCl. The organic layer was dried over anhydrous  $\text{Na}_2\text{SO}_4$  and filtered. Then, the solvent was evaporated under vacuum and the crude product was purified by column chromatography on silica-gel with petroleum ether/ethyl acetate (2:1) as the eluent to afford **12** as yellow liquid in 46 mg (90%).

### **1,2-Diphenylpiperidin-3-ol (12)**

Eluent: petroleum ether/ethyl acetate (2:1). Yellow liquid (46 mg, 90%).  $^1\text{H}$  NMR (400 MHz,  $\text{CDCl}_3$ ):  $\delta$  7.27-7.25 (m, 2H), 7.21-7.17 (m, 2H), 7.14-7.08 (m, 3H), 6.93-6.91 (m, 2H), 6.84-6.81 (m, 1H), 4.34 (d,  $J = 2.8$  Hz, 1H), 4.01-3.97 (m, 1H), 3.53-3.47 (m, 1H), 3.00-2.93 (m, 1H), 2.23-2.14 (m, 1H), 2.06-2.00 (m, 2H), 2.00-1.66 (m, 2H).  $^{13}\text{C}\{^1\text{H}\}$  NMR (150 MHz,  $\text{CDCl}_3$ ):  $\delta$  152.0, 140.3, 128.7, 128.35, 128.29, 126.9, 122.1, 121.9, 70.2, 67.3, 55.4, 30.3, 21.0. HRMS (ESI)  $m/z$ :  $[\text{M}+\text{H}]^+$  Calcd for  $\text{C}_{17}\text{H}_{20}\text{NO}$  254.1539; Found 254.1537.

**8.4.** To a reaction tube equipped with a stir bar were added 1,2-diphenylpiperidin-2-ol (**12**, 25 mg, 0.1 mmol), DMF (0.5 mL), and NaH (12 mg, 0.3 mmol, 60% susp.) at 0 °C. The resulting mixture was then warmed to room temperature and stirred for additional 1 h. To the mixture was added

3,5-bis(trifluoromethyl)benzyl bromide (92 mg, 0.3 mmol). After completion of the addition, the reaction mixture was heated to 70 °C and stirred for additional 0.5 h. The resulting solution was cooled to room temperature, quenched by H<sub>2</sub>O and diluted by ethyl acetate. The organic layer was dried over anhydrous Na<sub>2</sub>SO<sub>4</sub> and filtered. Then, the solvent was evaporated under vacuum and the crude product was purified by column chromatography on silica-gel with petroleum ether/ethyl acetate (2:1) as the eluent to afford **13** as yellow liquid in 42 mg (88%).

### **3-((3,5-Bis(trifluoromethyl)benzyl)oxy)-1,2-diphenylpiperidine (13)**

Eluent: petroleum ether/ethyl acetate (2:1). Yellow liquid (42 mg, 88%). <sup>1</sup>H NMR (400 MHz, CDCl<sub>3</sub>): δ 7.73 (s, 1H), 7.57 (s, 2H), 7.42 (d, *J* = 7.2 Hz, 2H), 7.24-7.12 (m, 5H), 6.91 (d, *J* = 8.0 Hz, 2H), 6.79-6.76 (m, 1H), 4.75-4.72 (m, 1H), 4.58 (d, *J* = 14.4 Hz, 1H), 4.36 (d, *J* = 14.4 Hz, 1H), 3.91-3.88 (m, 1H), 3.48-3.43 (m, 1H), 3.25-3.20 (m, 1H), 2.11-2.03 (m, 2H), 1.87-1.76 (m, 2H). <sup>13</sup>C{<sup>1</sup>H} NMR (150 MHz, CDCl<sub>3</sub>): δ 151.4, 141.1, 139.9, 131.4 (q, <sup>2</sup>*J*<sub>C-F</sub> = 32.7 Hz), 128.9, 128.6, 128.0, 127.4, 126.9, 123.3 (q, <sup>1</sup>*J*<sub>C-F</sub> = 271.2 Hz), 121.3 (q, <sup>4</sup>*J*<sub>C-F</sub> = 3.3 Hz), 120.1, 118.8, 78.7, 70.7, 64.1, 50.0, 26.5, 21.8. <sup>19</sup>F{<sup>1</sup>H} NMR (CDCl<sub>3</sub>, 376 MHz): δ - 62.8. HRMS (ESI) *m/z*: [M+H]<sup>+</sup> Calcd for C<sub>26</sub>H<sub>24</sub>F<sub>6</sub>NO 480.1757; Found 480.1752.

**8.5.** To a reaction tube equipped with a stir bar were added 1-(phenyl)piperidine (**1a**, 32 mg, 0.2 mmol), THF (1 mL), ethyl 3-oxo-4-(4-oxoquinazolin-3(4*H*)-yl)butanoate (**14**, 82 mg, 0.3 mmol), T<sup>+</sup>BF<sub>4</sub><sup>-</sup> (97 mg, 0.4 mmol), and CaCl<sub>2</sub> (11 mg, 0.1 mmol). The resulting mixture was then stirred at room temperature under air for 0.5 h. Upon completion, the mixture was diluted with ethyl acetate and aqueous NaCl. The organic layer was dried over anhydrous Na<sub>2</sub>SO<sub>4</sub> and filtered. Then, the solvent was evaporated under vacuum and the crude product was purified by column chromatography on silica-gel with petroleum ether/ethyl acetate (1:1) as the eluent to afford **15** as white solid in 45 mg (51%).

**Ethyl 3-oxo-2-(3-oxo-1-phenylpiperidin-2-ylidene)-4-(4-oxoquinazolin-3(4H)-yl)butanoate (15)**

Eluent: petroleum ether/ethyl acetate (1:1). White solid (45 mg, 51%), mp 124-125 °C. <sup>1</sup>H NMR (400 MHz, CDCl<sub>3</sub>): δ 8.28 (dd,  $J_1 = 8.0$  Hz,  $J_2 = 0.8$  Hz, 1H), 8.04 (s, 1H), 7.80-7.72 (m, 2H), 7.54-7.50 (m, 1H), 7.18-7.14 (m, 2H), 6.83 (t,  $J = 7.6$  Hz, 1H), 6.49 (d,  $J = 8.0$  Hz, 2H), 5.65 (d,  $J = 17.6$  Hz, 1H), 5.48 (d,  $J = 17.6$  Hz, 1H), 4.41-4.33 (m, 2H), 3.78-3.74 (m, 1H), 3.52-3.48 (m, 1H), 2.34-2.20 (m, 2H), 2.08-2.04 (m, 2H), 1.39 (t,  $J = 7.2$  Hz, 3H). <sup>13</sup>C{<sup>1</sup>H} NMR (150 MHz, CDCl<sub>3</sub>): δ 193.4, 187.9, 162.6, 160.9, 148.1, 146.1, 142.3, 134.8, 129.3, 127.7, 126.8, 121.8, 120.6, 115.1, 110.8, 109.3, 61.1, 51.4, 46.5, 41.2, 22.1, 14.3. HRMS (ESI) m/z: [M+H]<sup>+</sup> Calcd for C<sub>25</sub>H<sub>24</sub>N<sub>3</sub>O<sub>5</sub> 446.1710; Found 446.1707.

### III. Copies of the NMR Spectra of 3a-3q

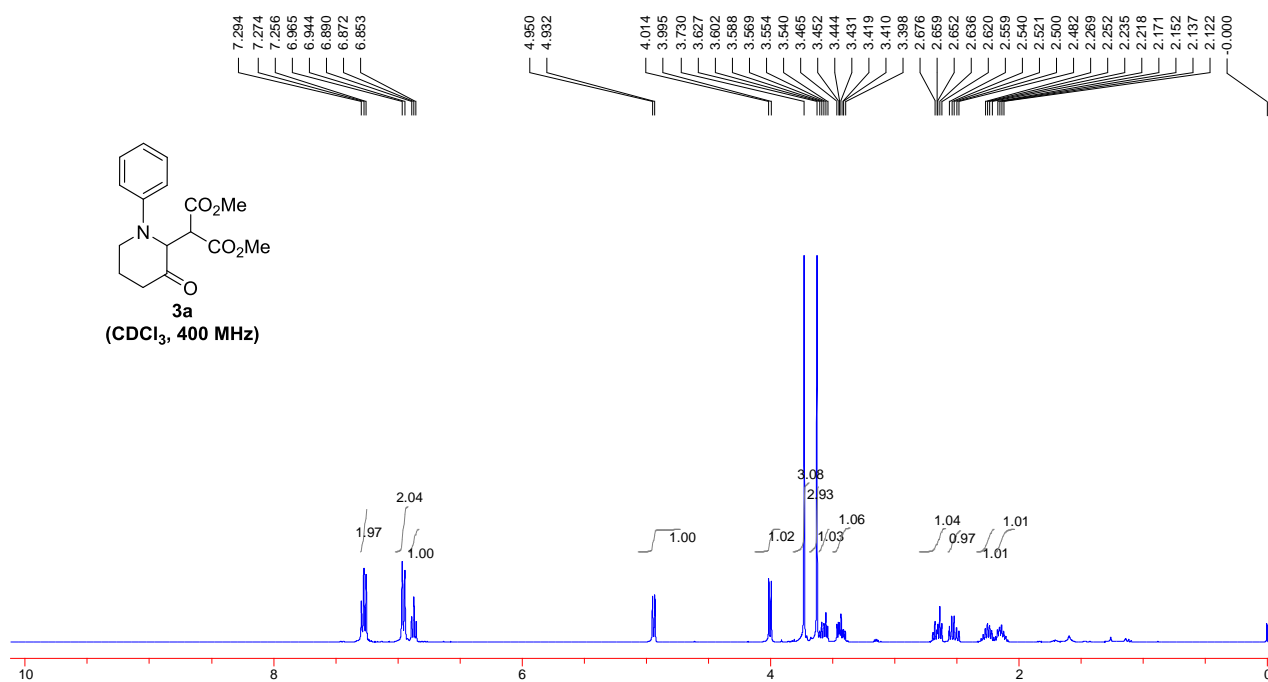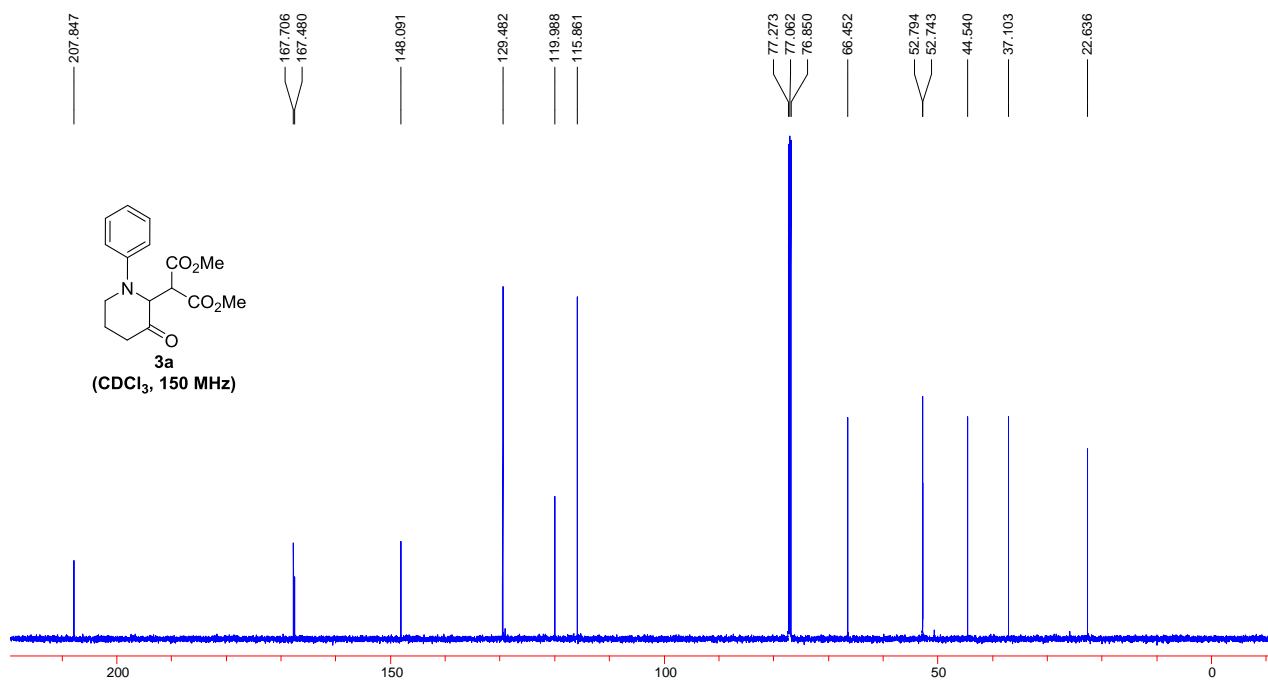

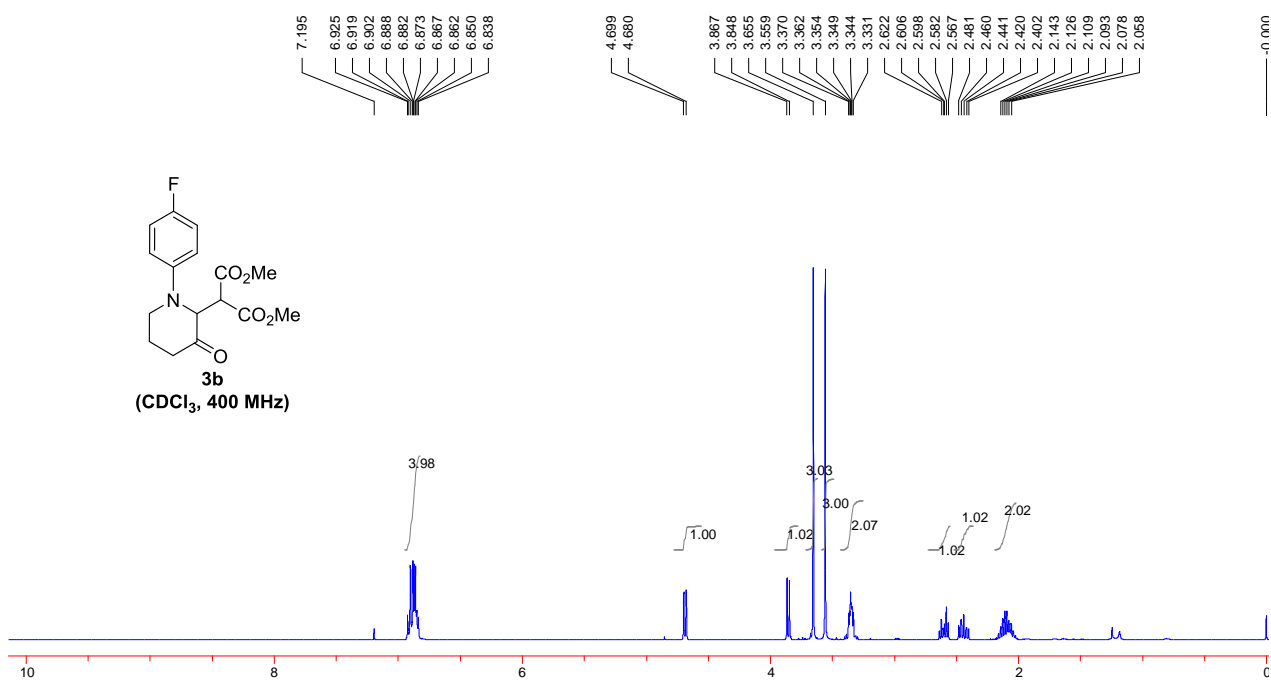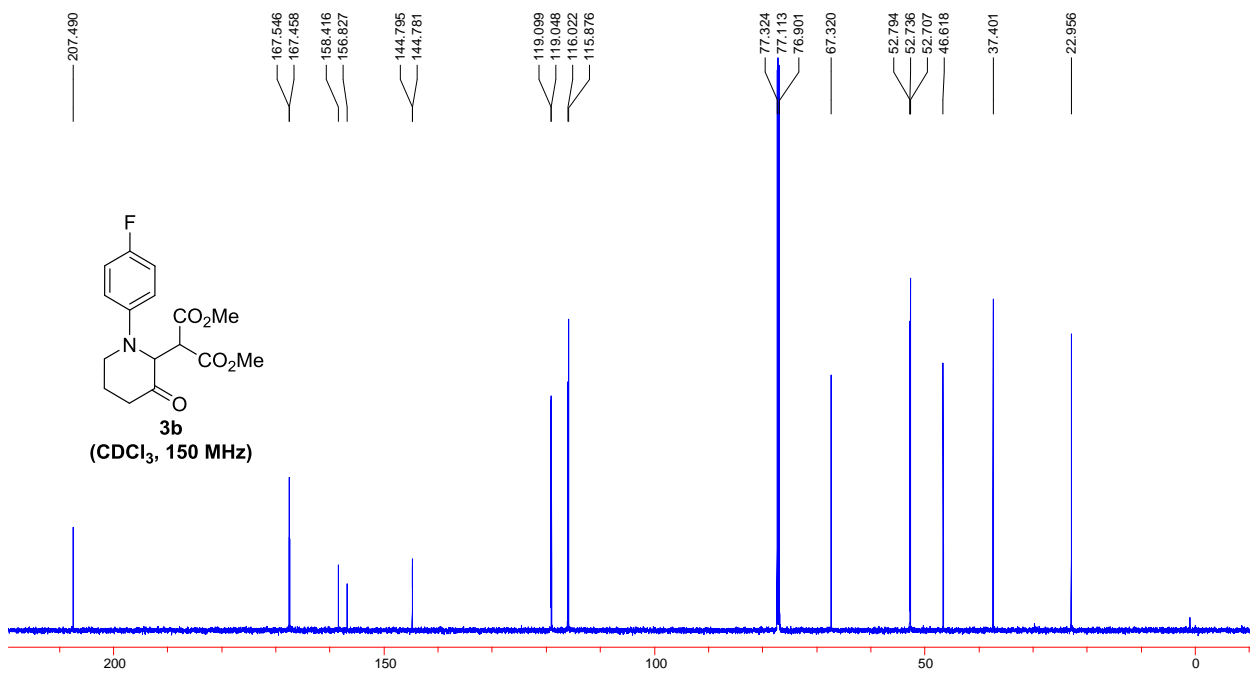

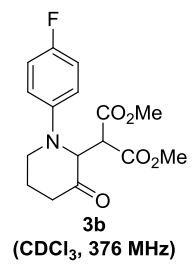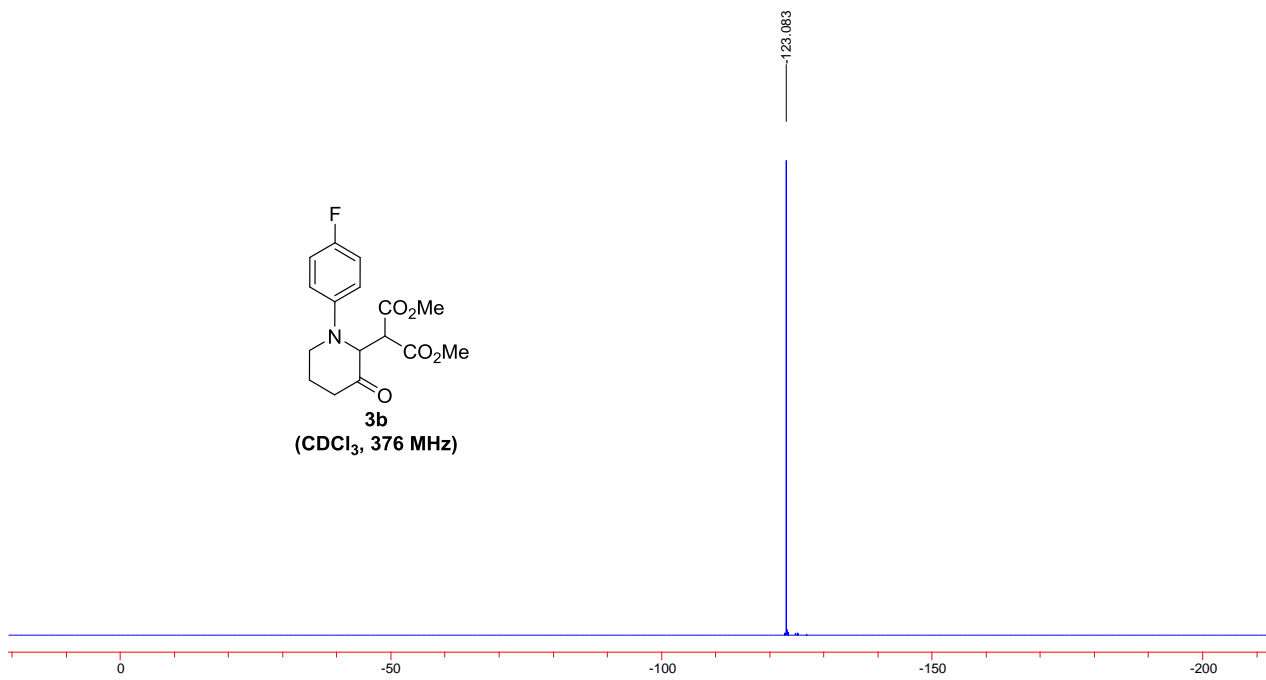

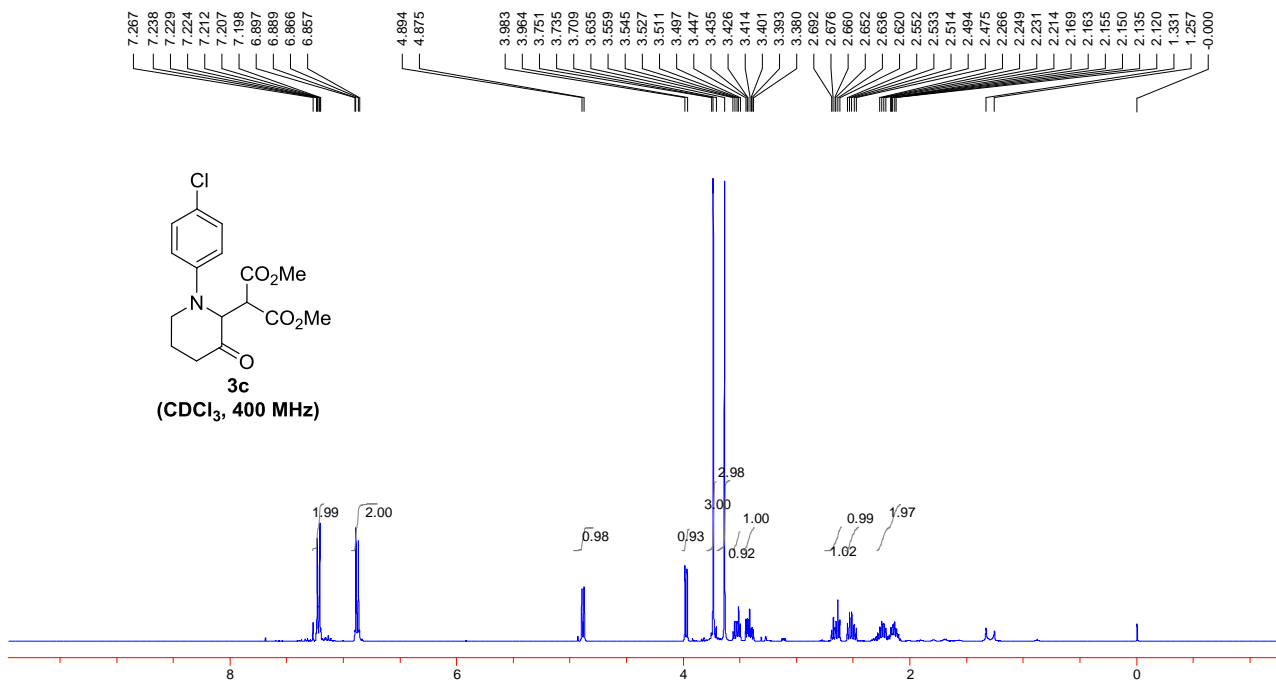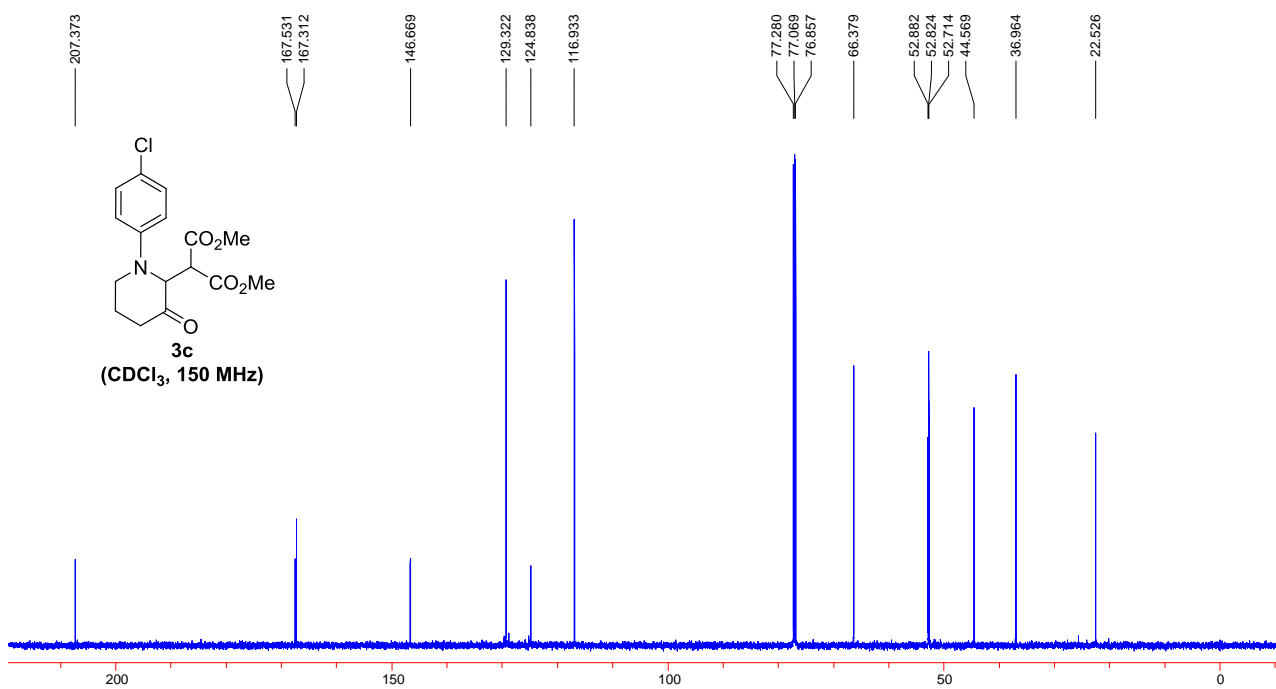

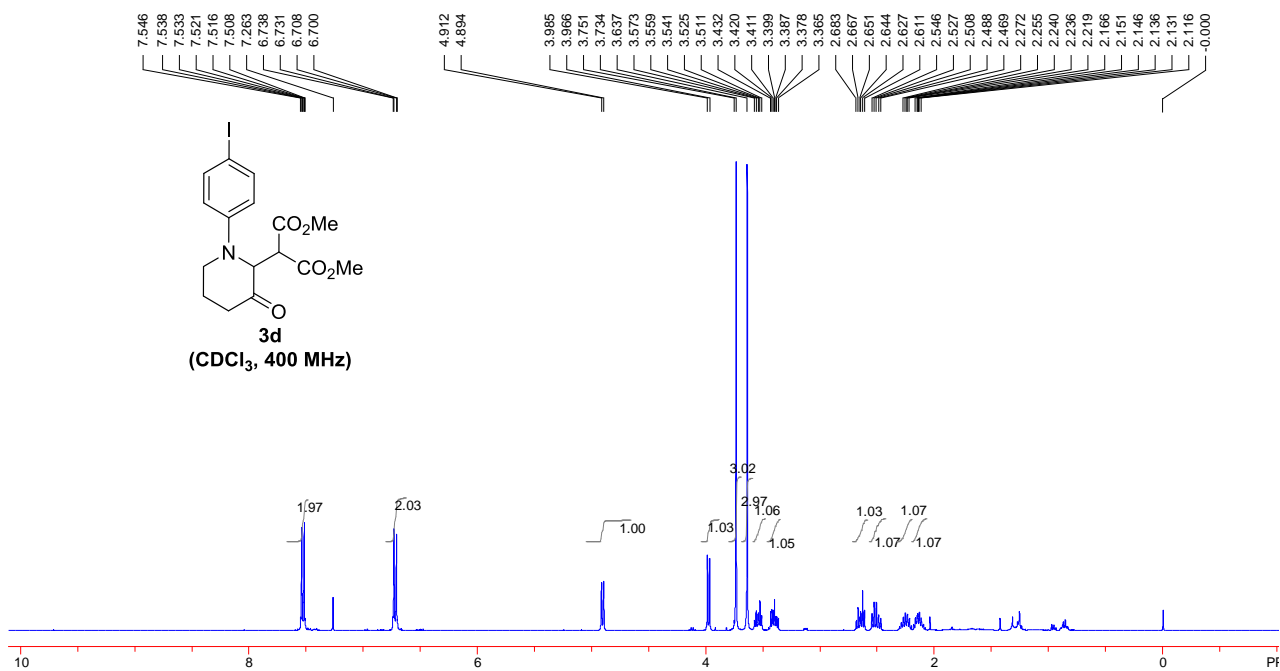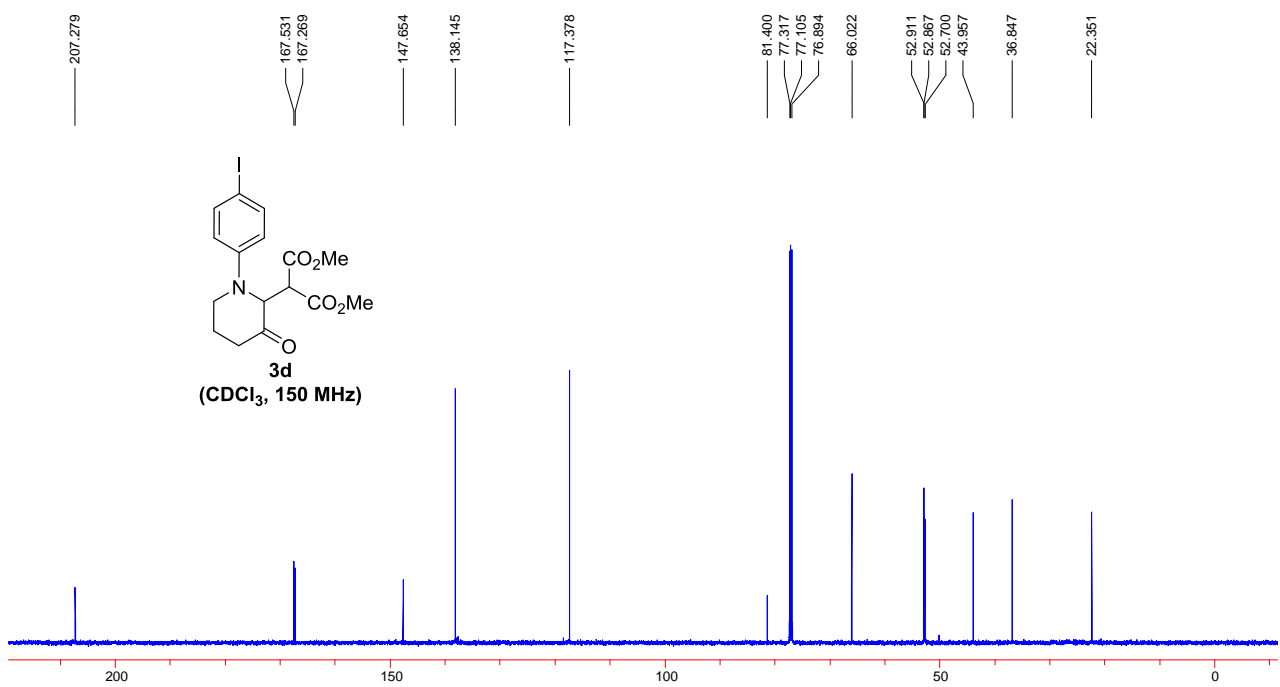



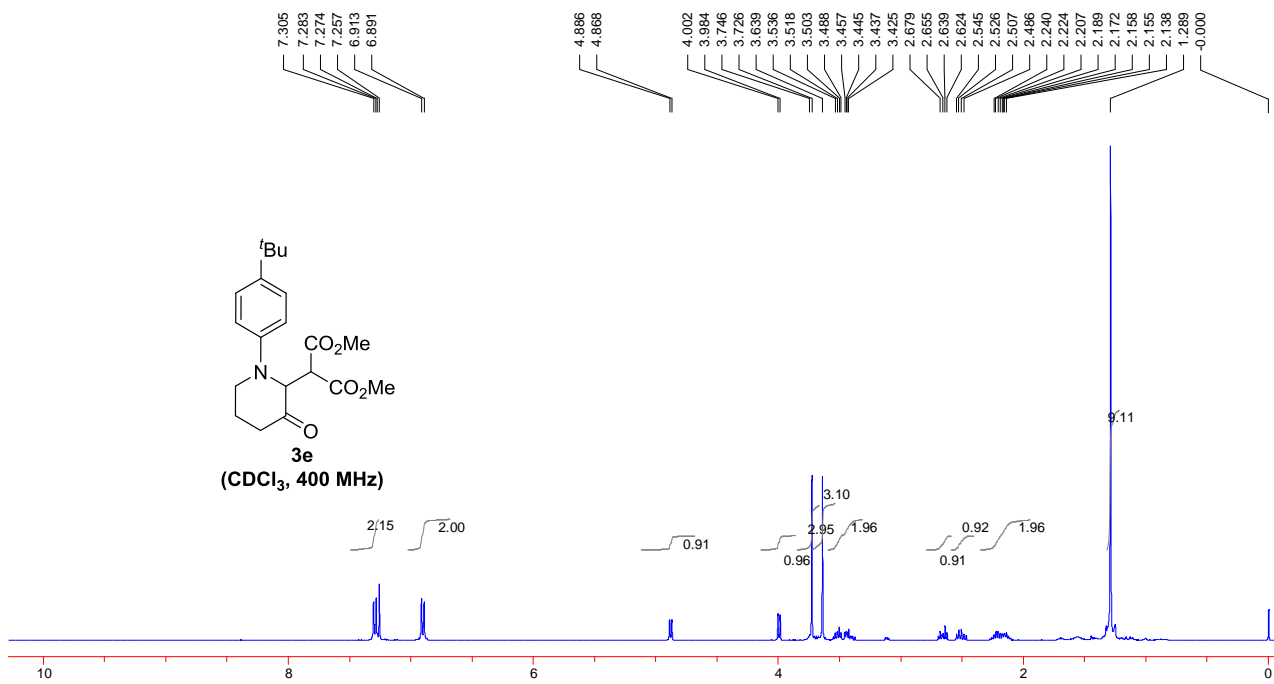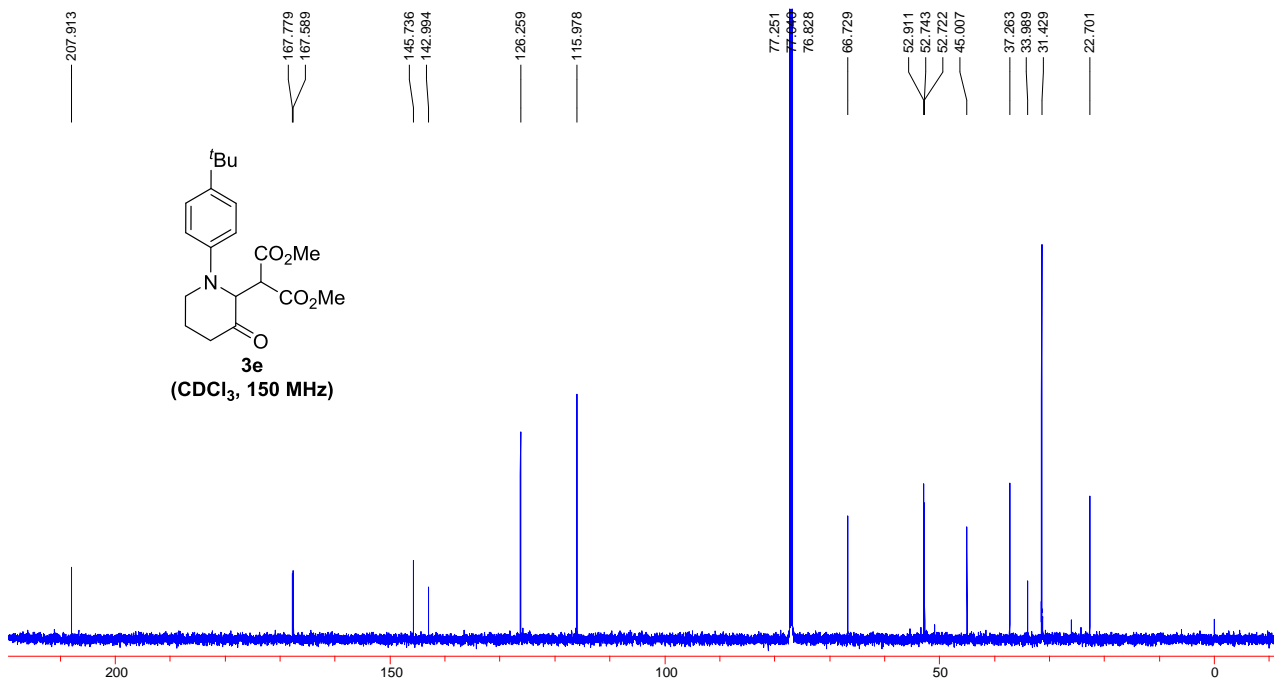

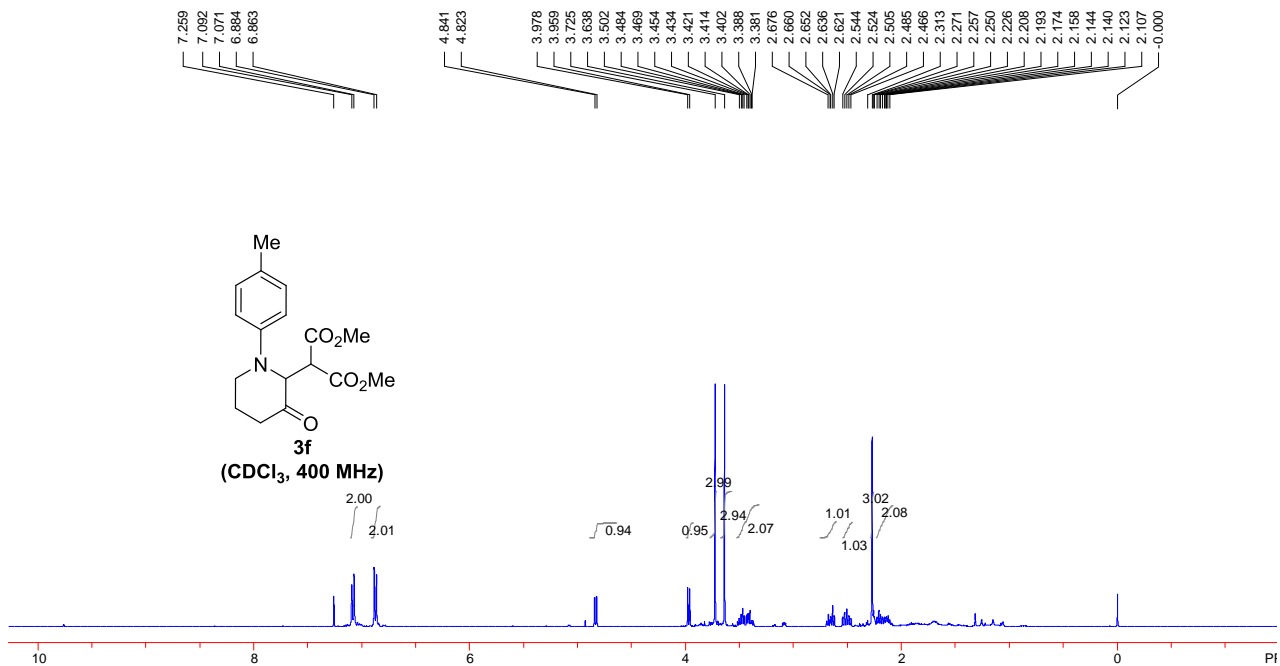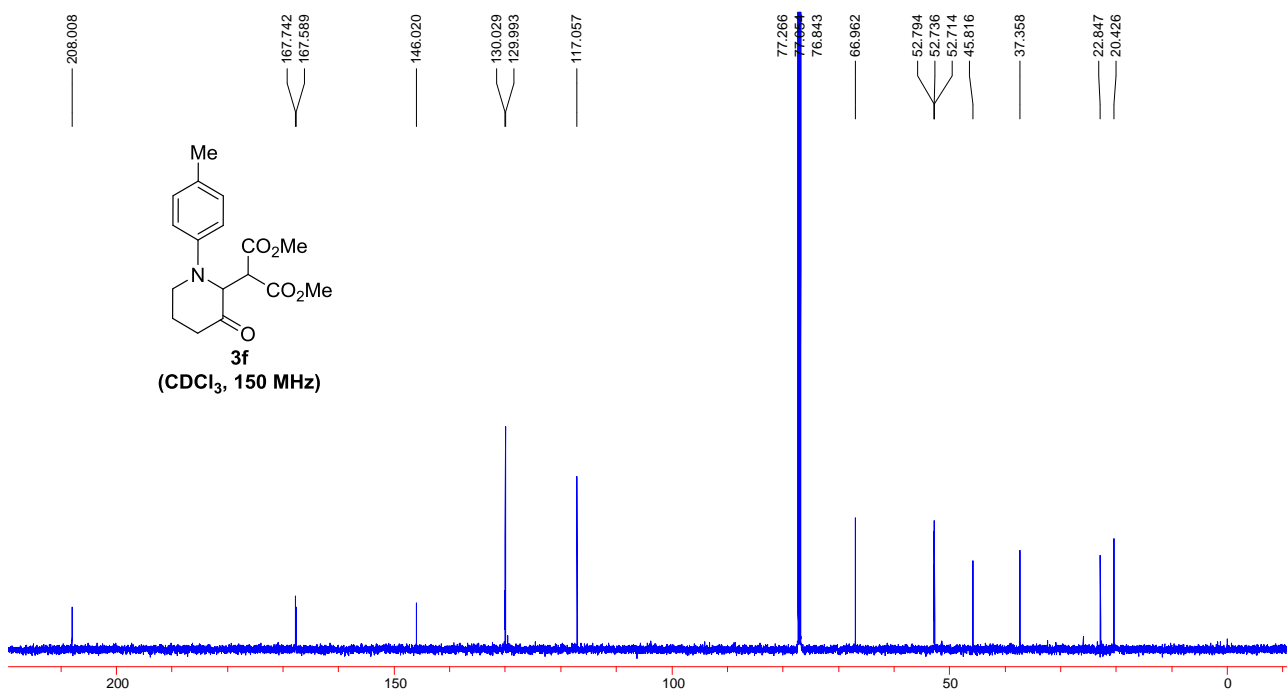

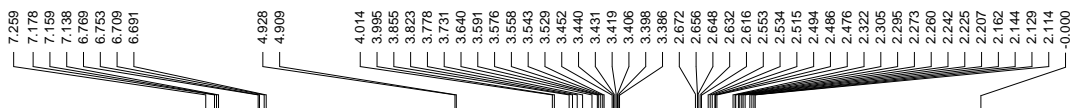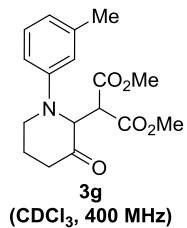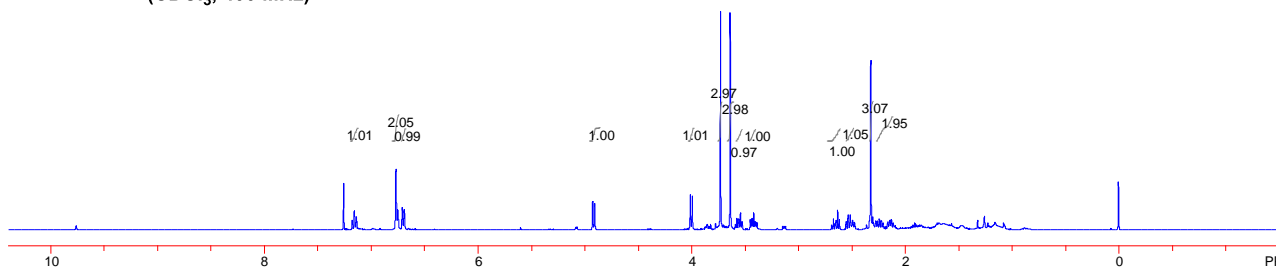

207.964

167.742  
167.509

148.179

139.253

129.300

120.944

116.758  
113.061

77.266  
77.064  
76.843

66.532

52.824  
52.773  
52.736  
44.642

37.124

22.708  
21.833

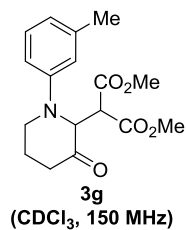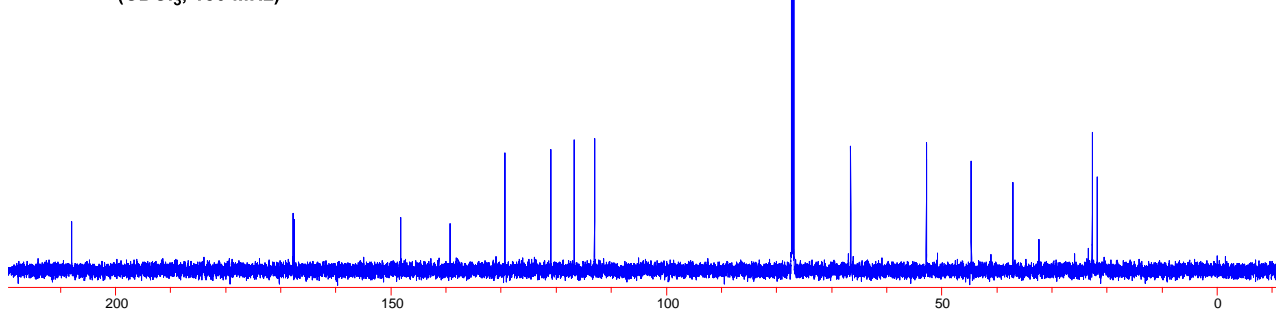

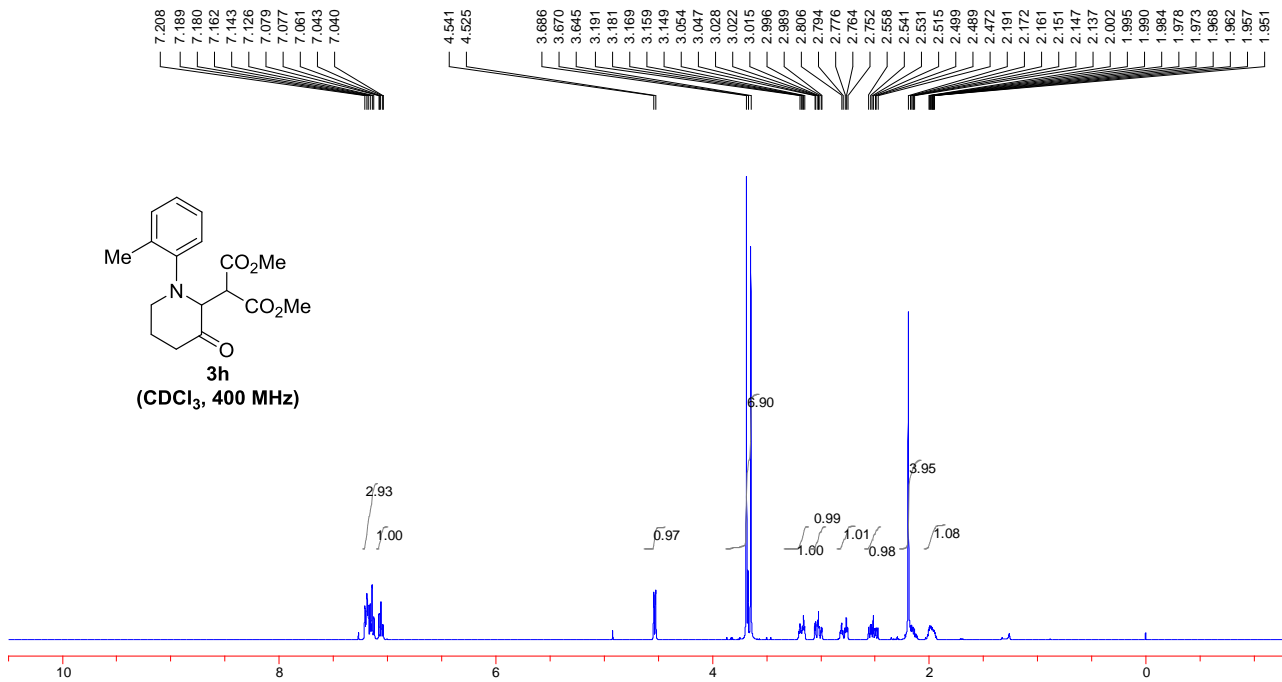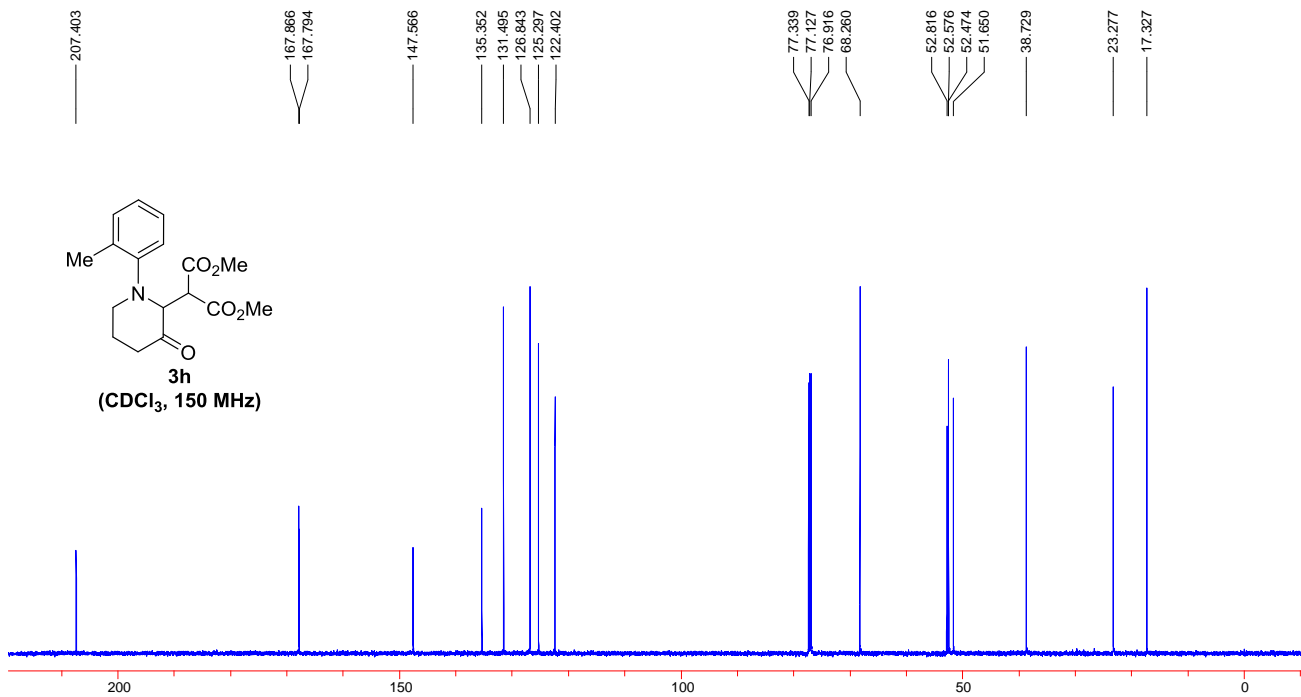

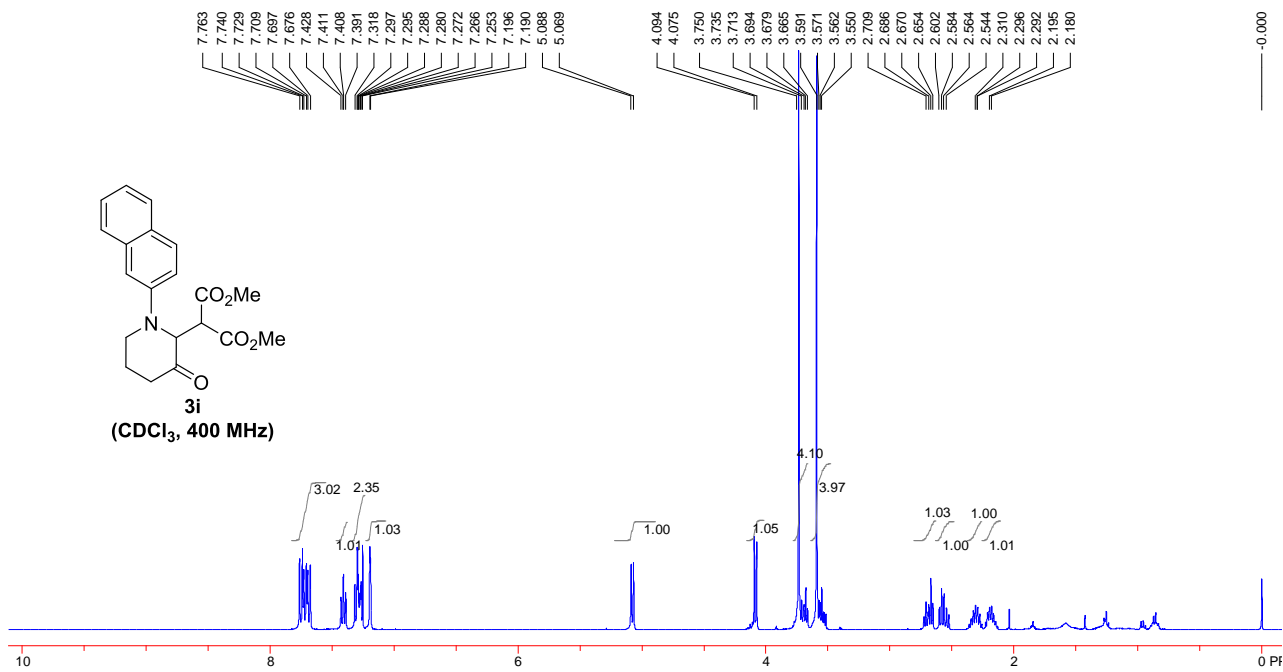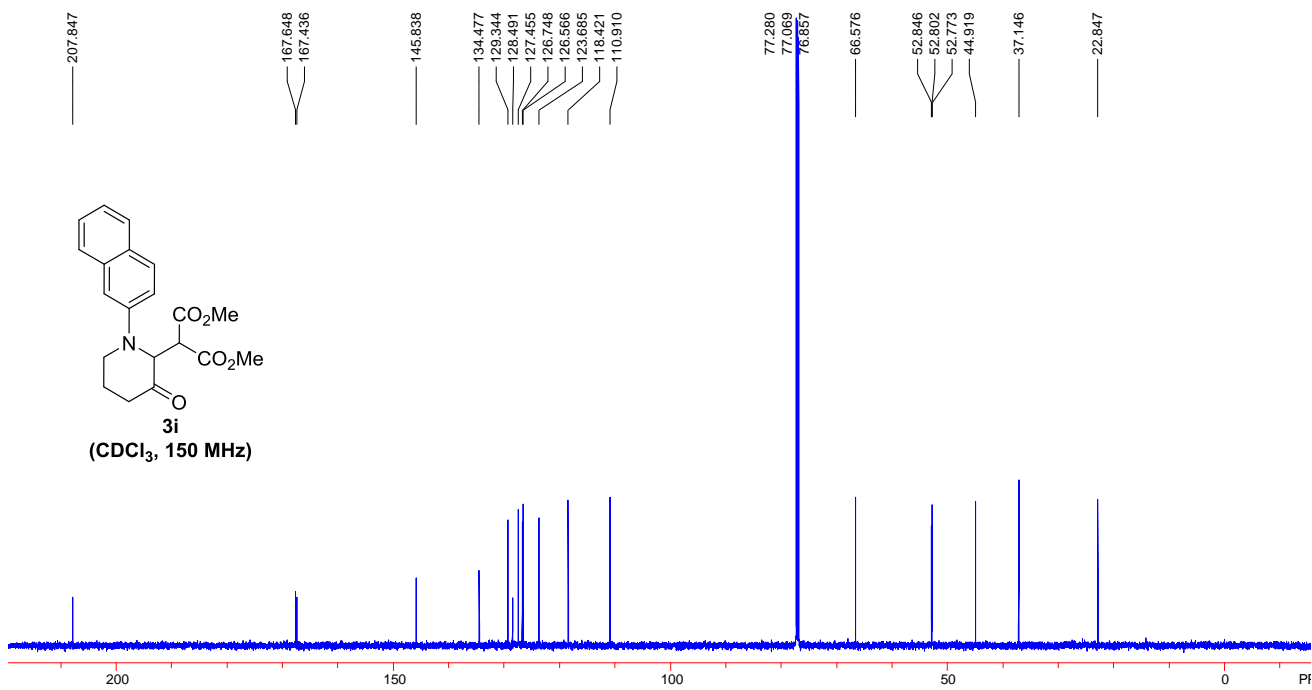

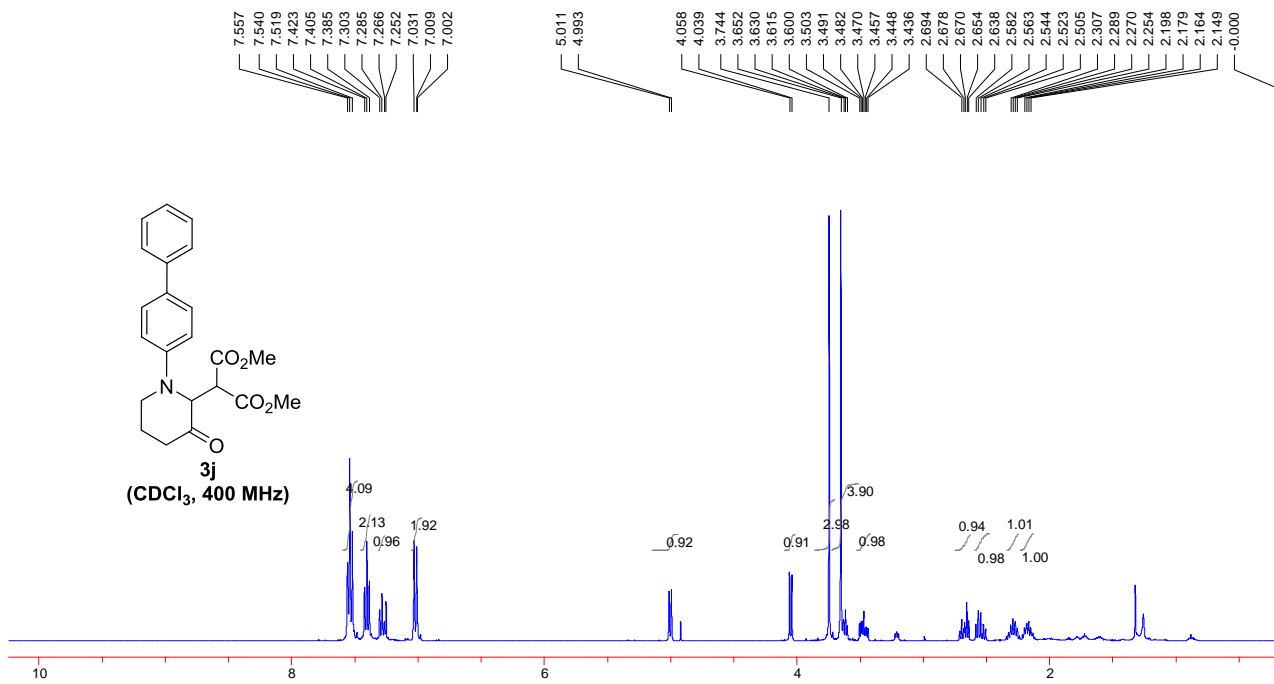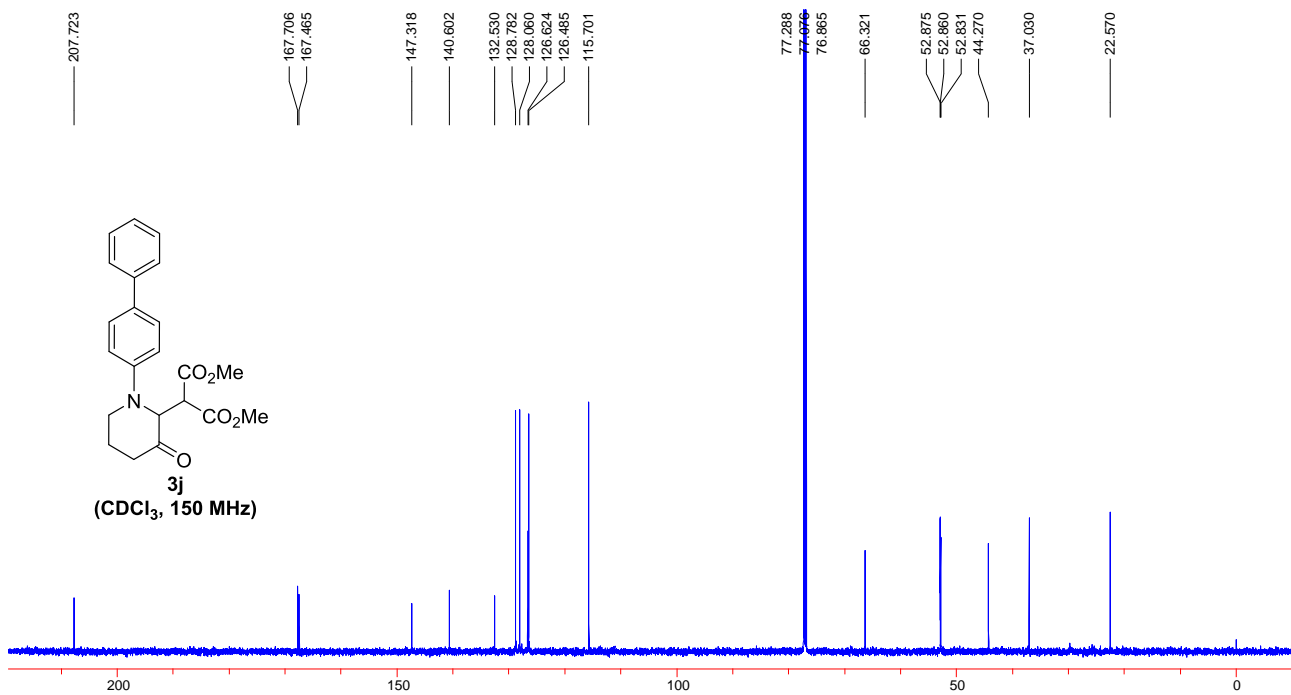

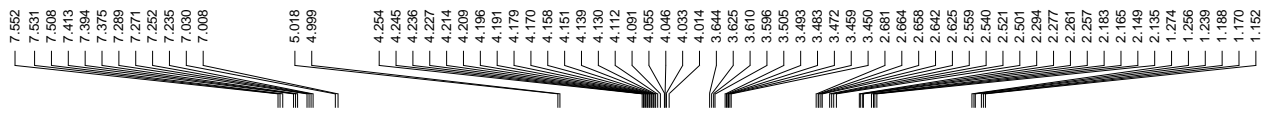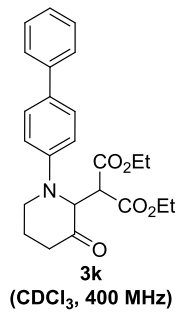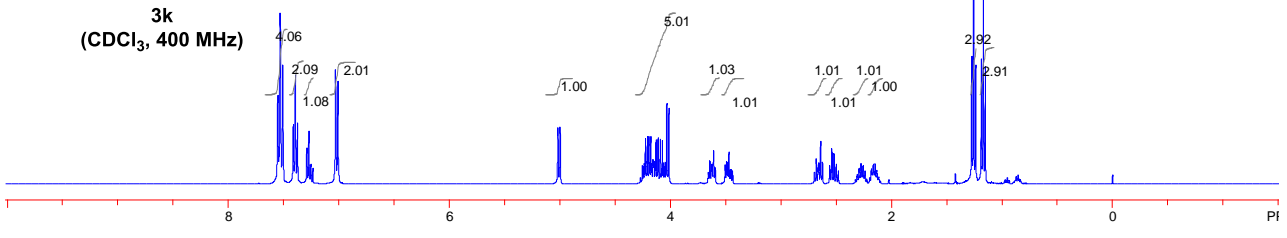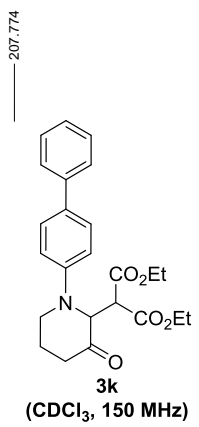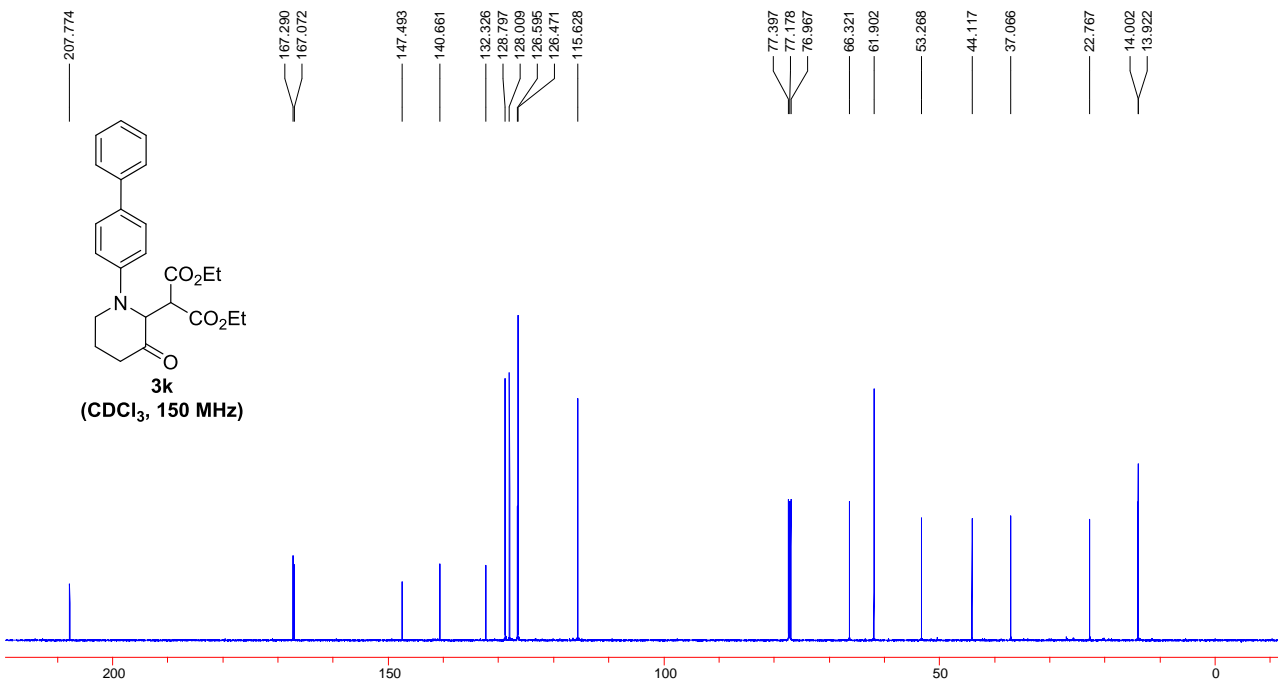

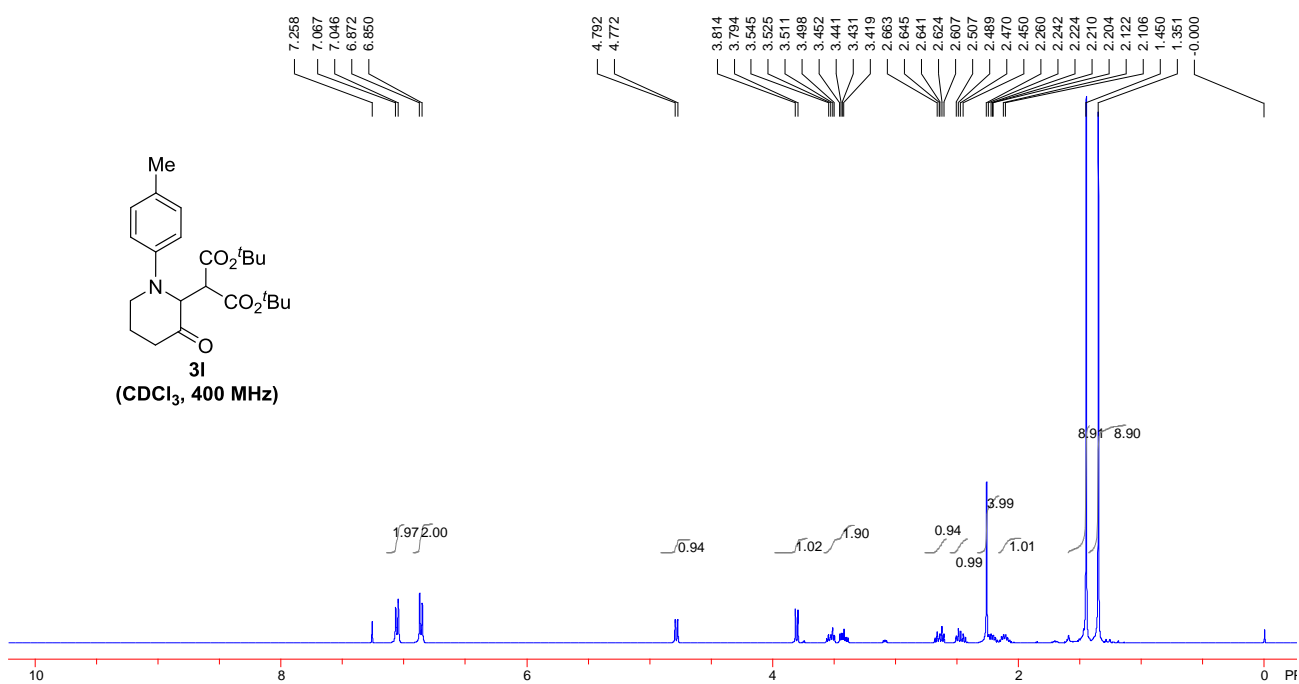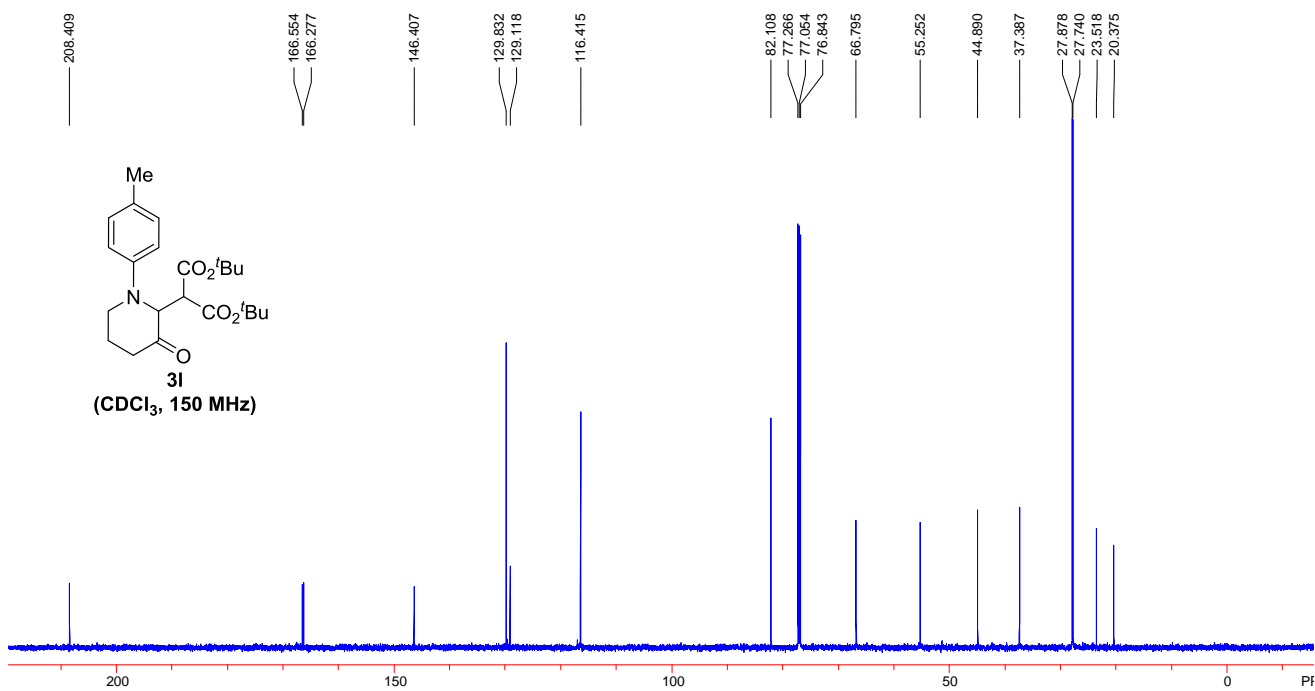



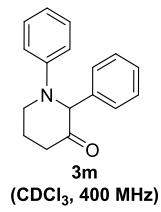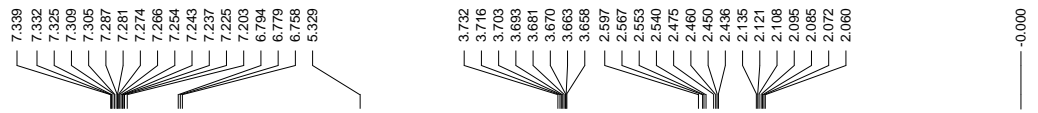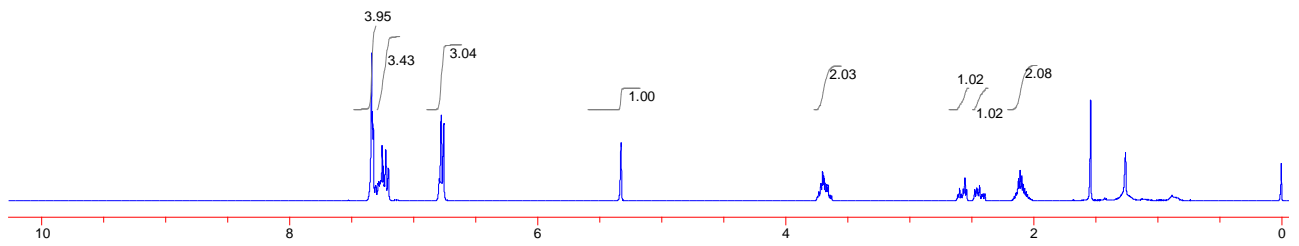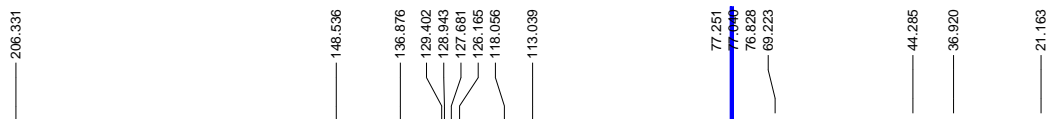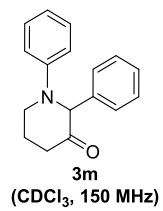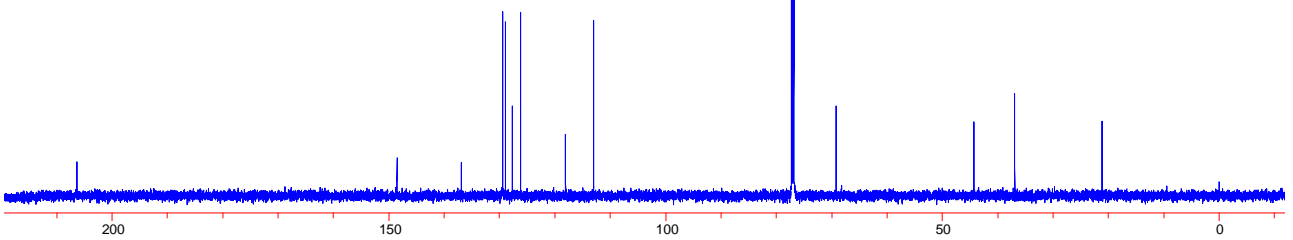

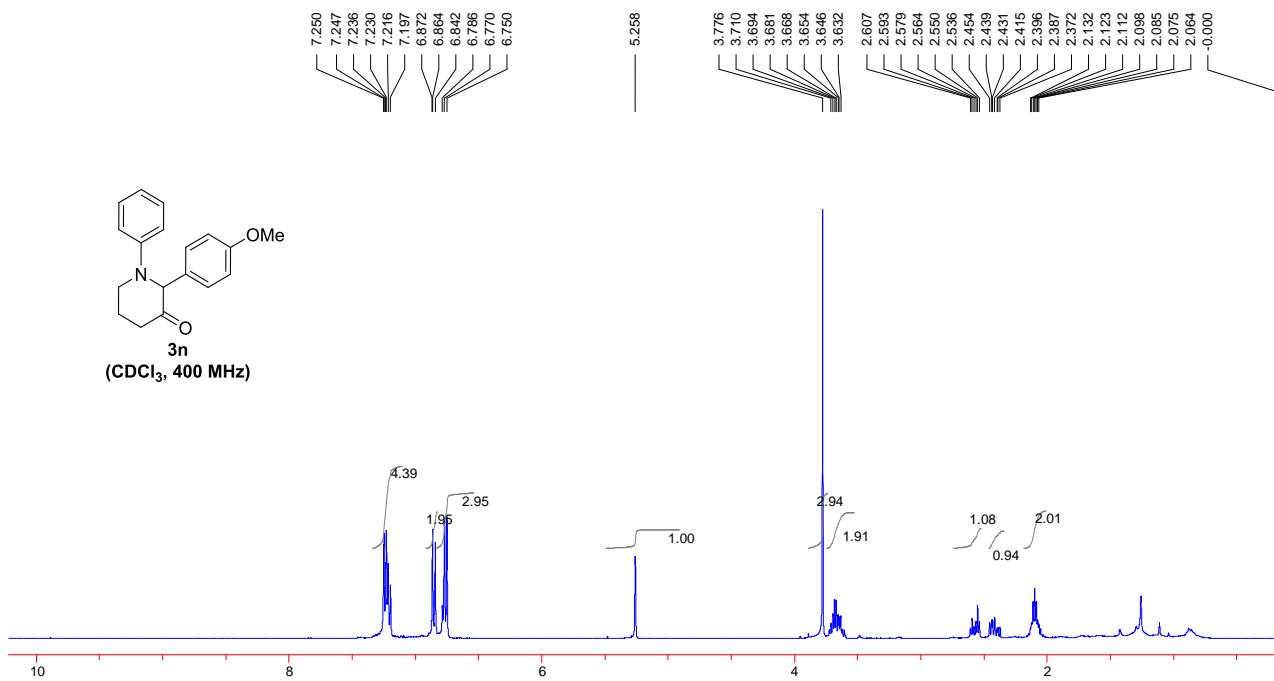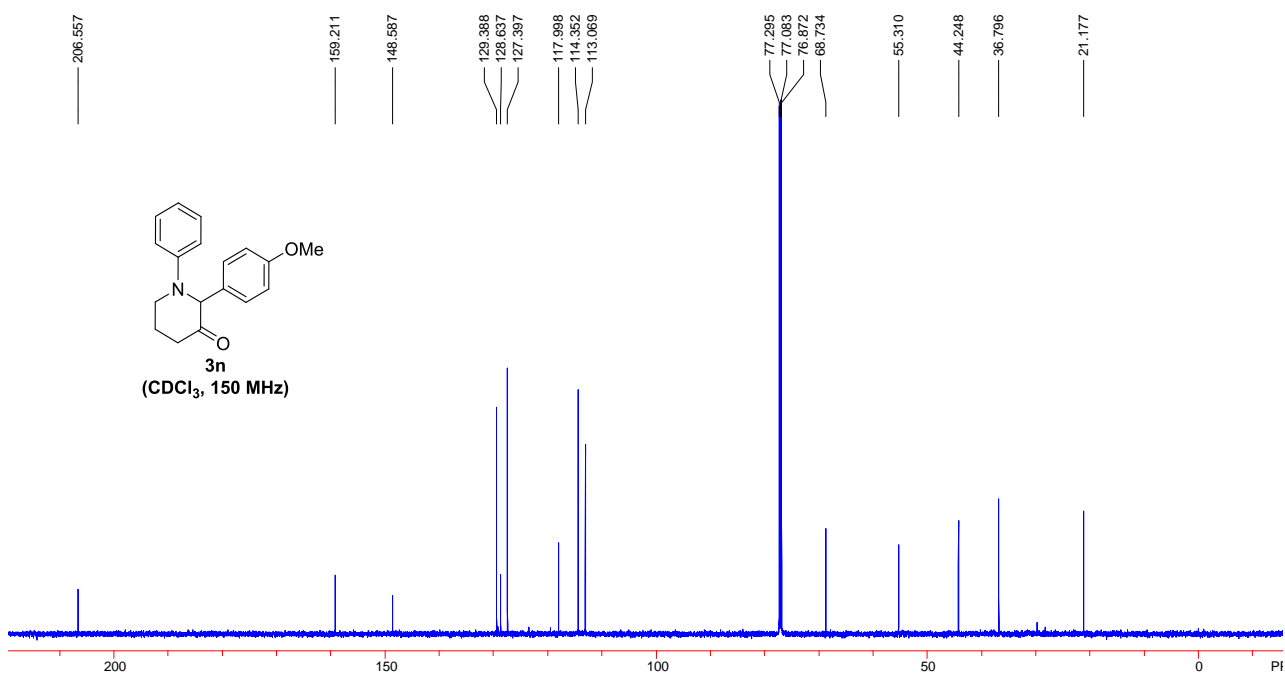

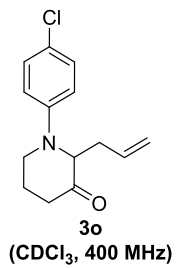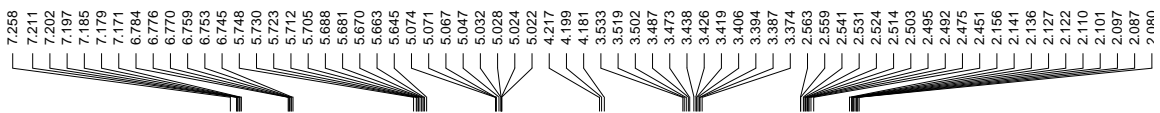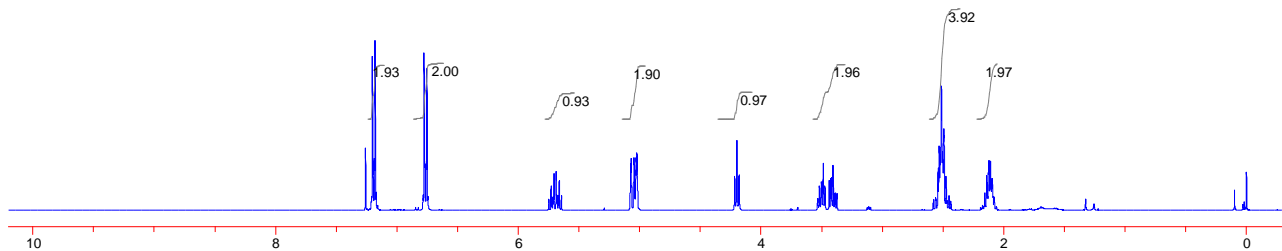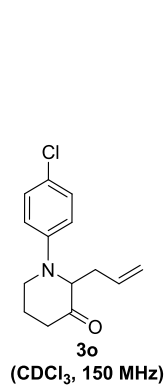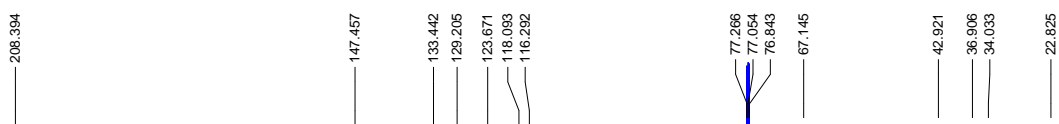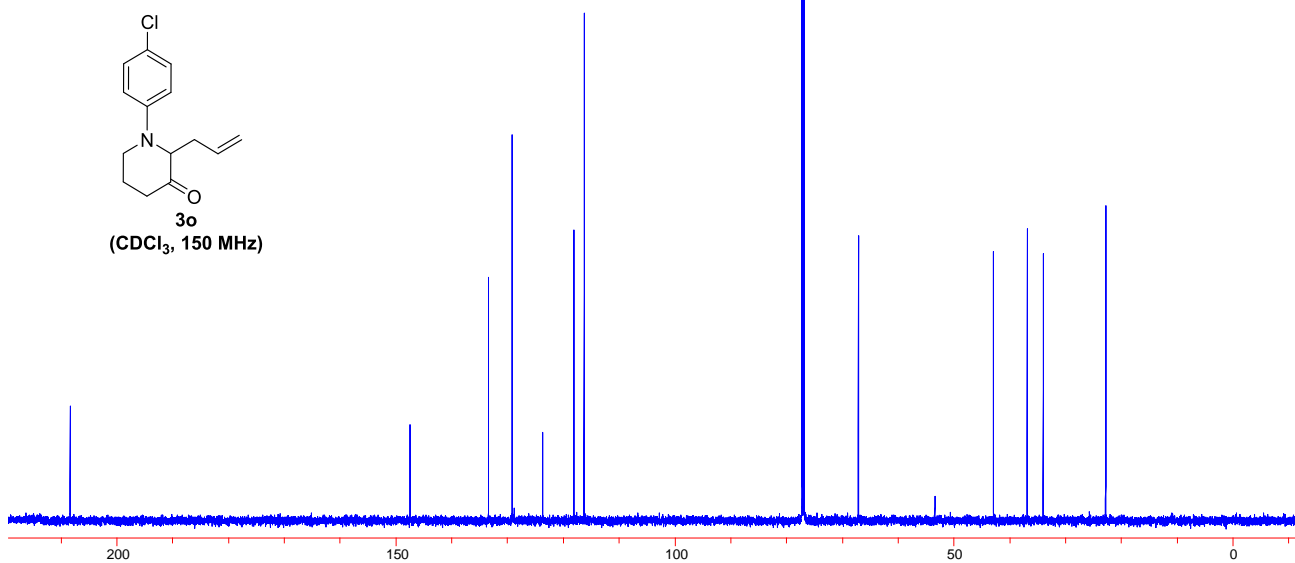

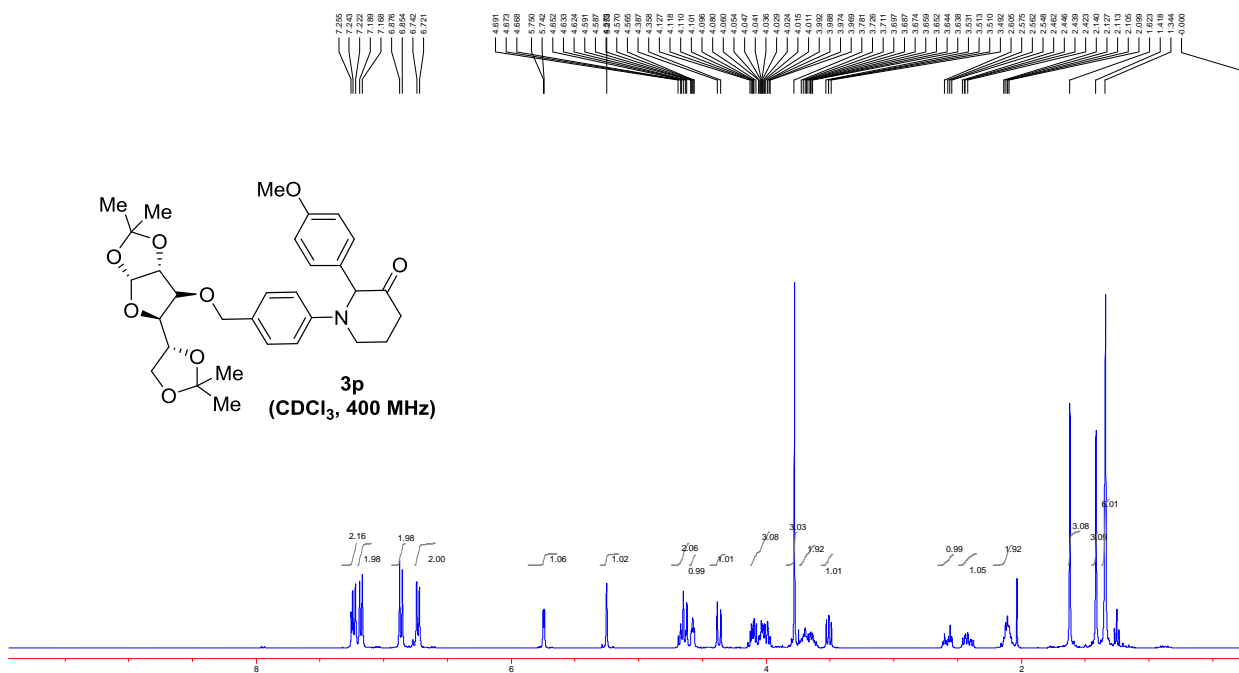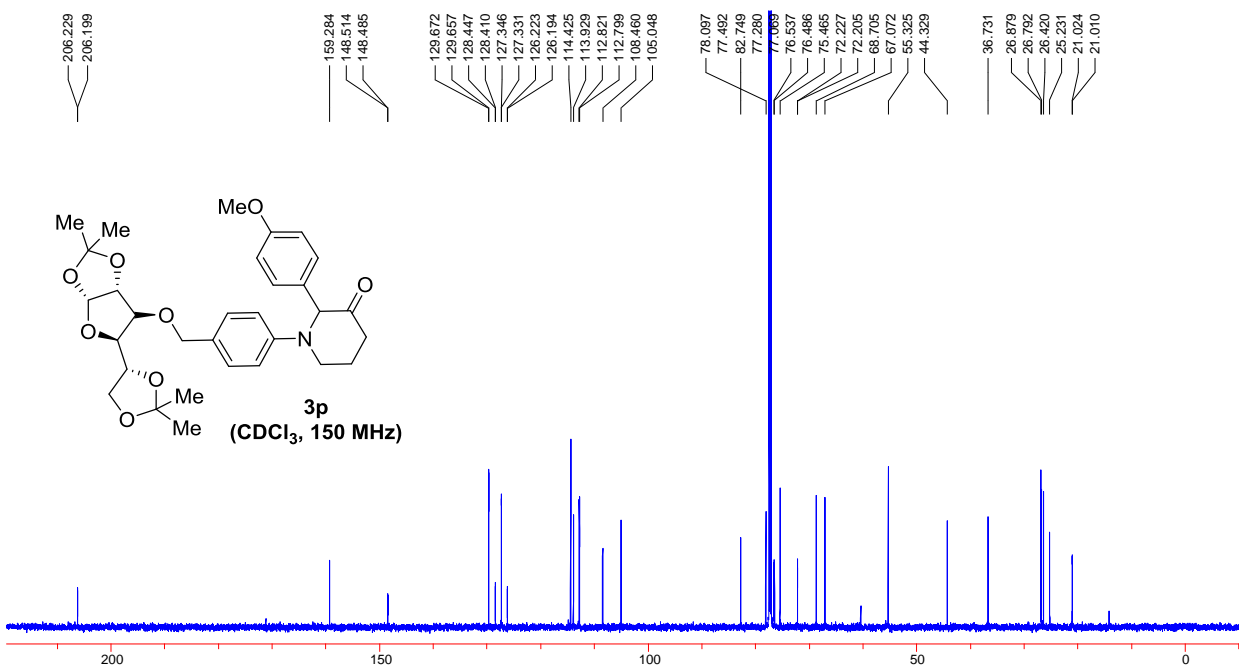

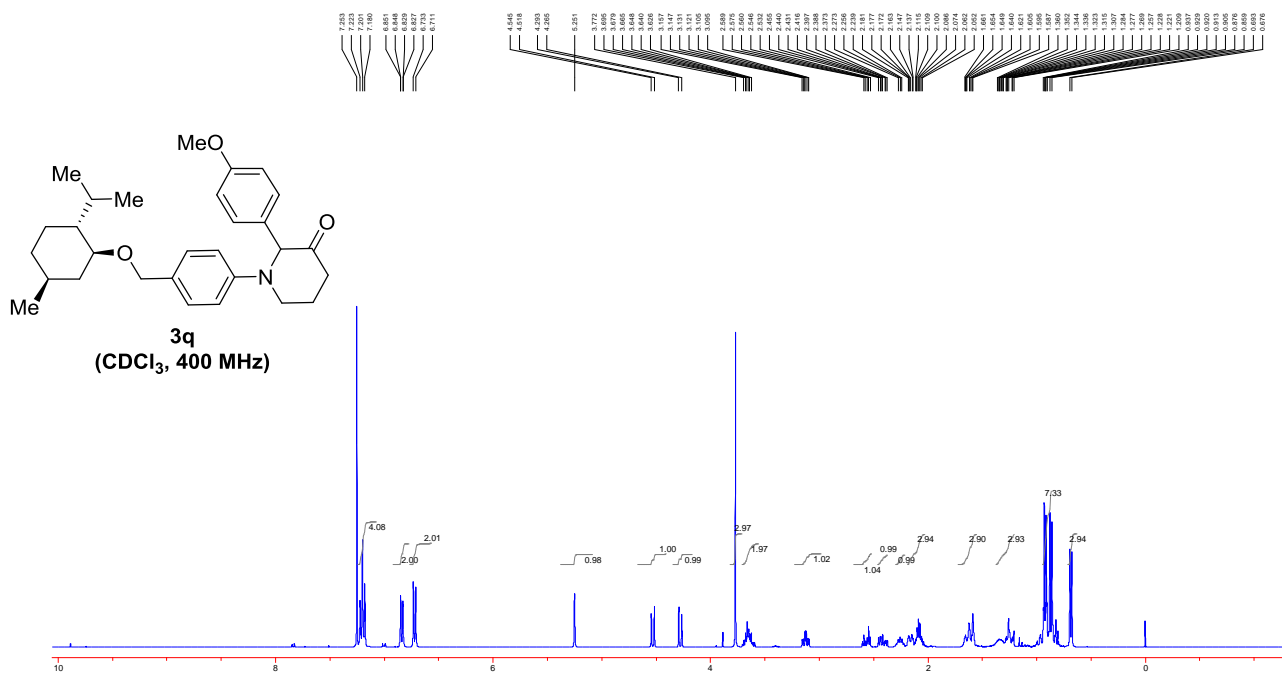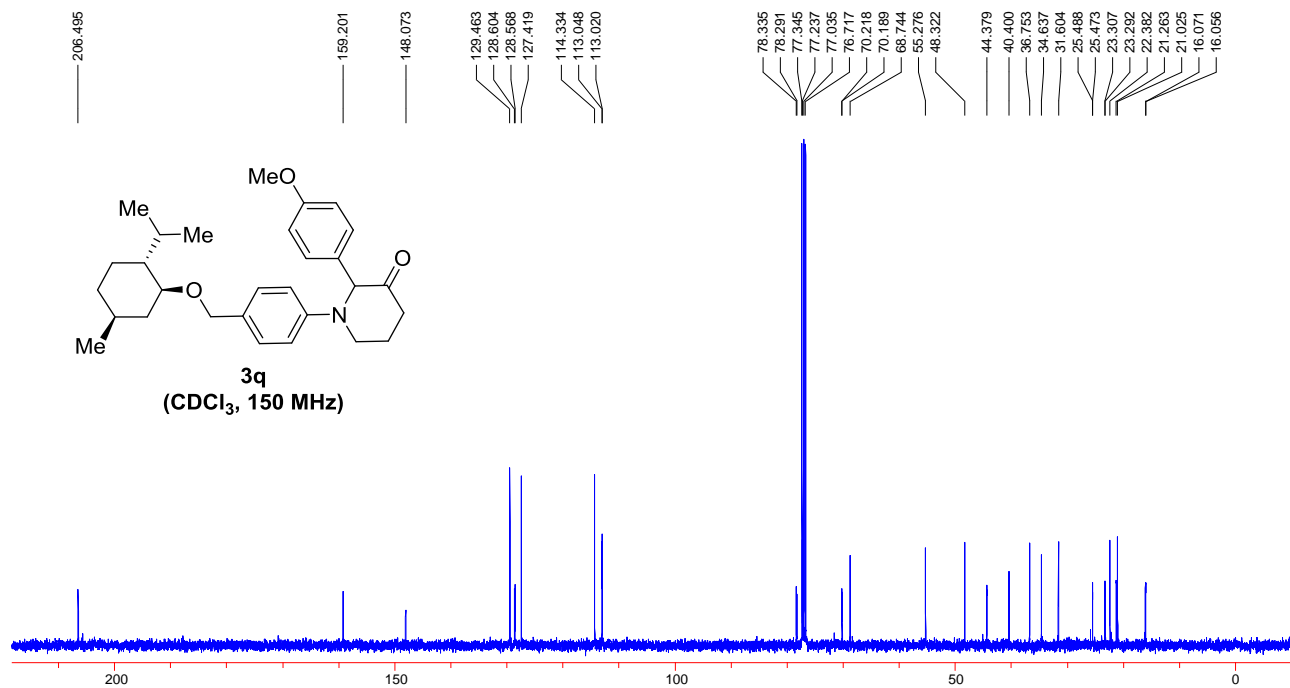

## IV. Copies of the NMR Spectra of 5a-5d

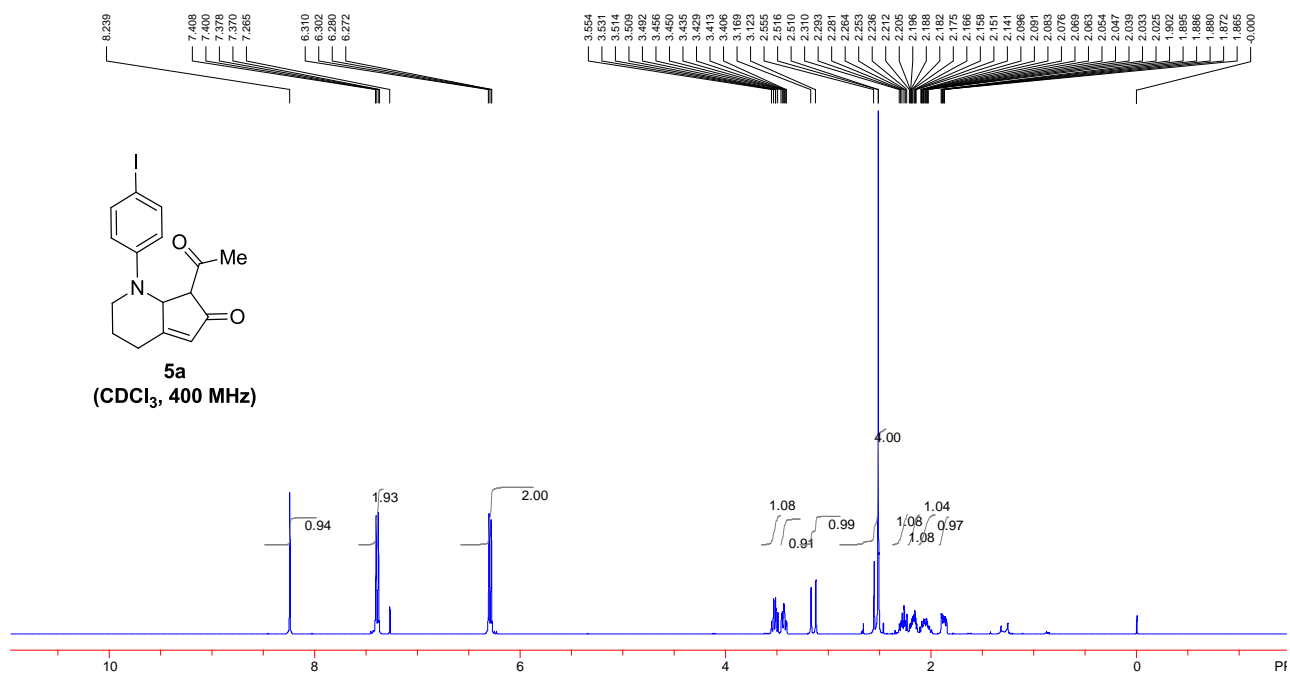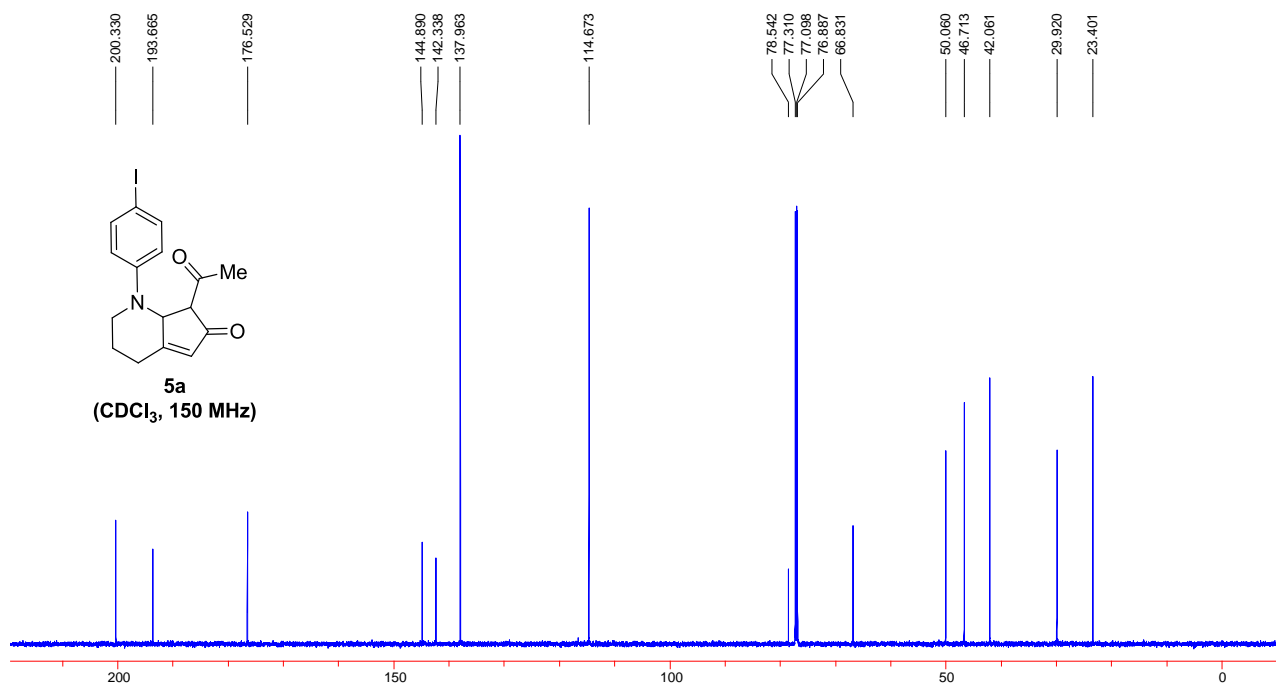

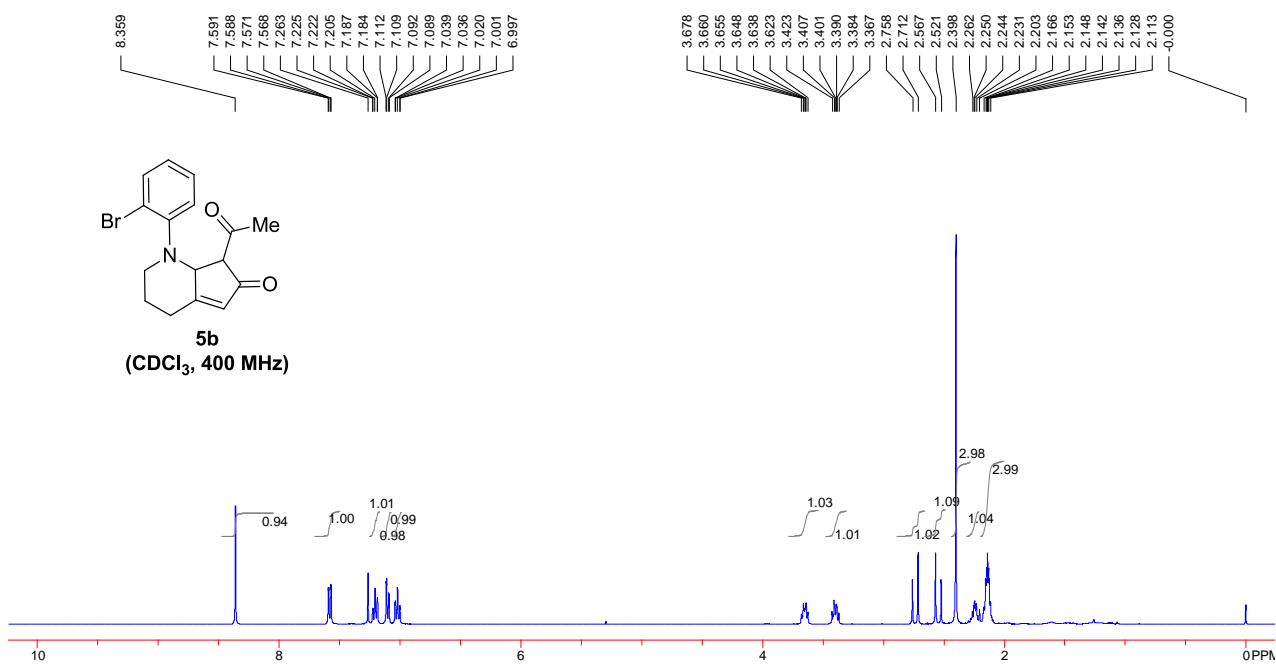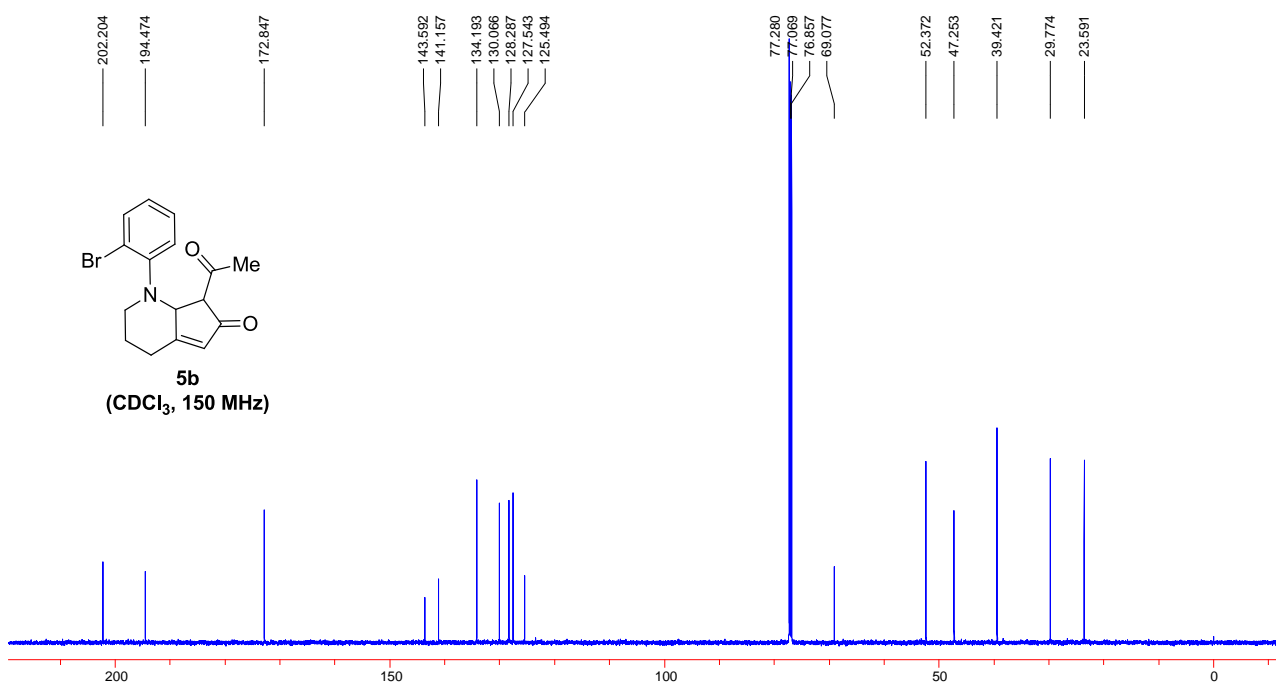

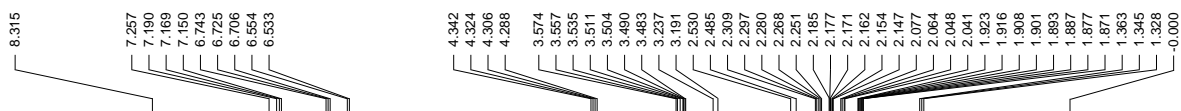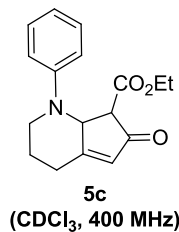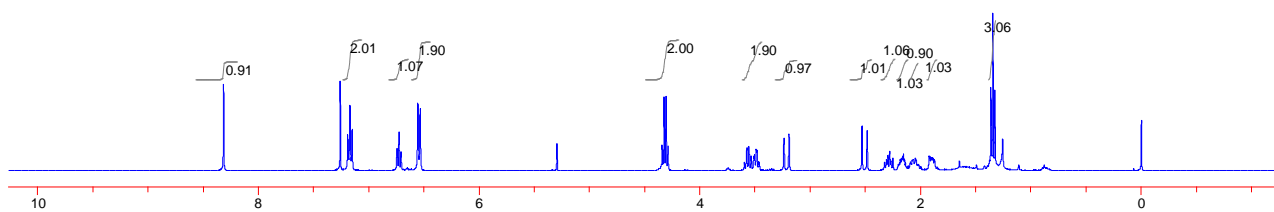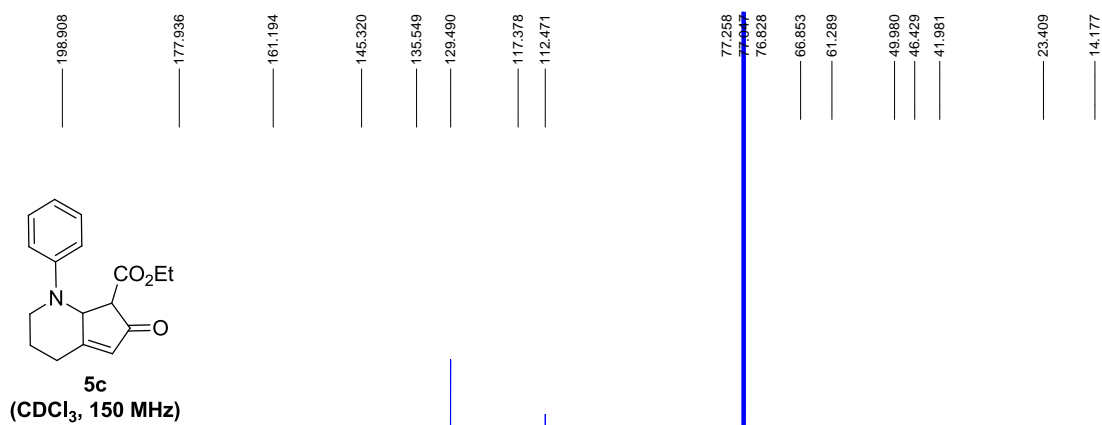



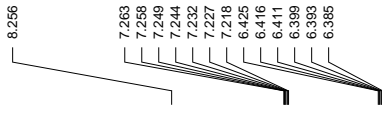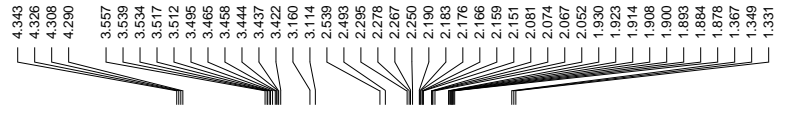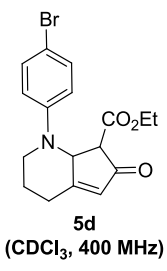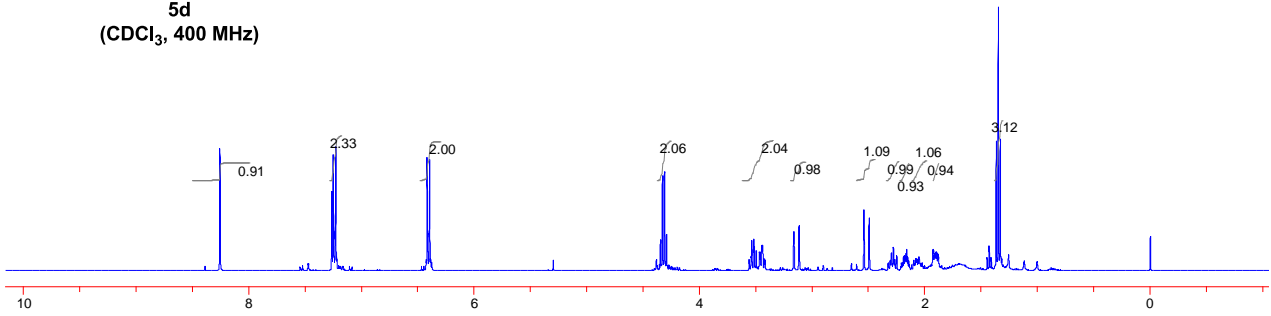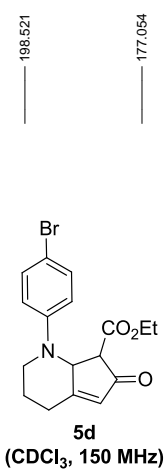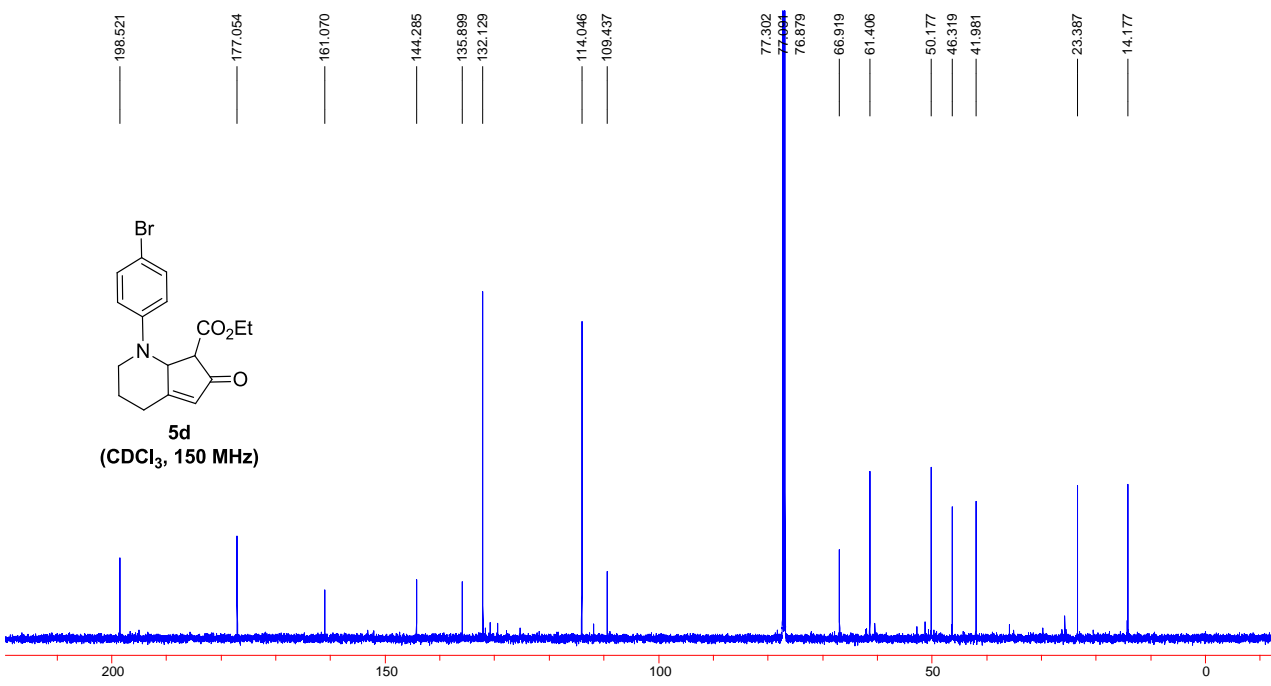

## V. Copies of the NMR Spectra of 7a-7b

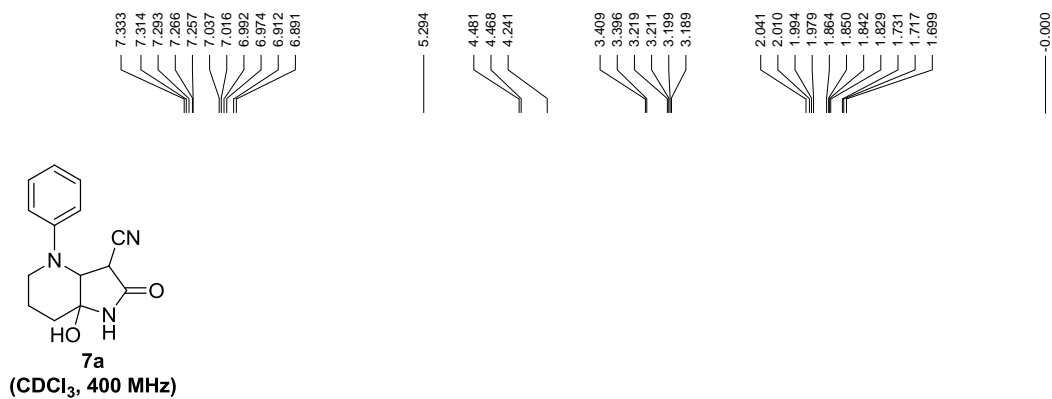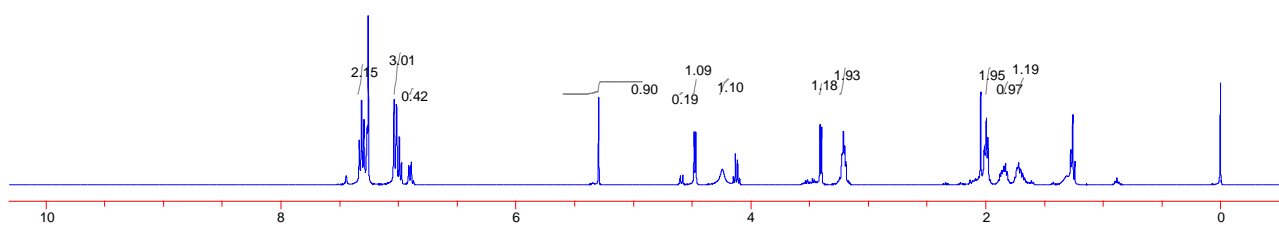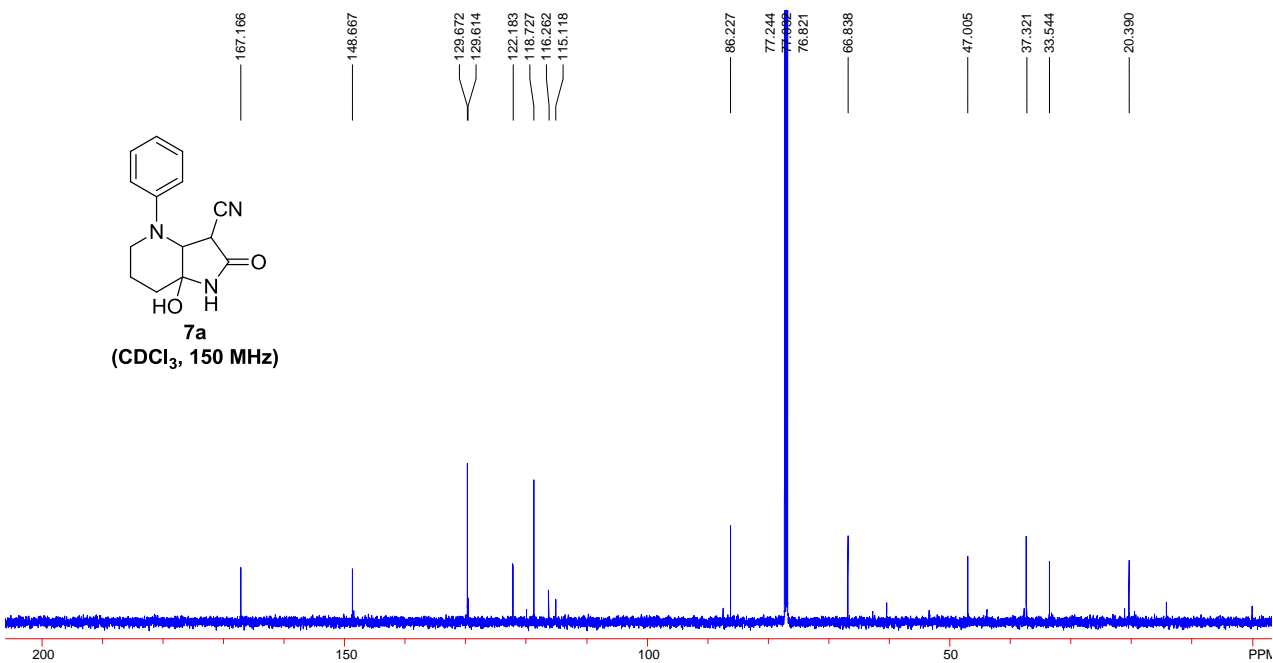

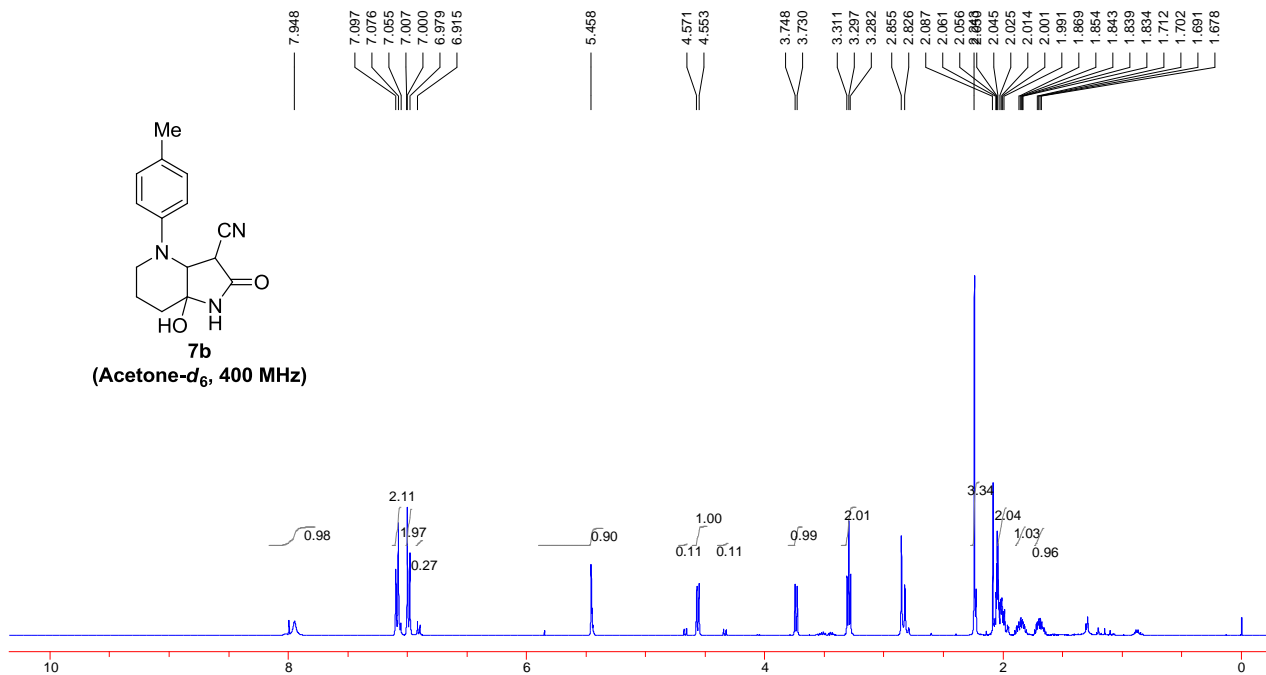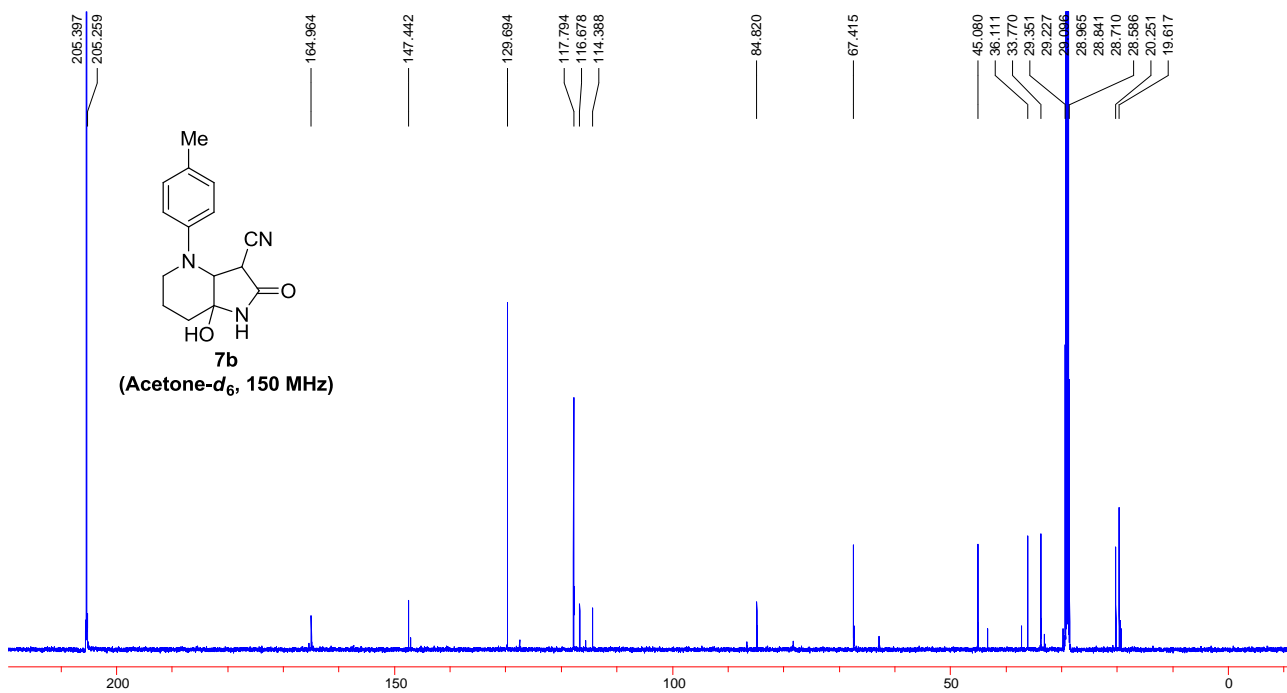

## VI. Copies of the NMR Spectra of 9a-9q

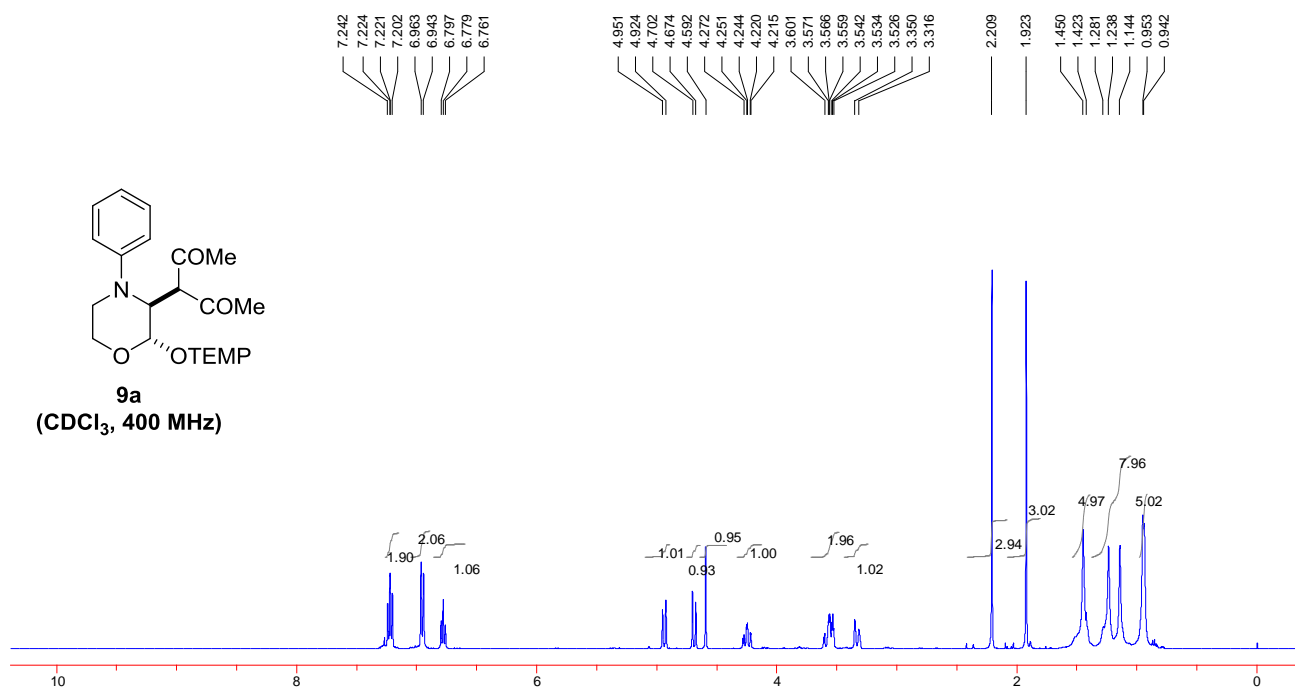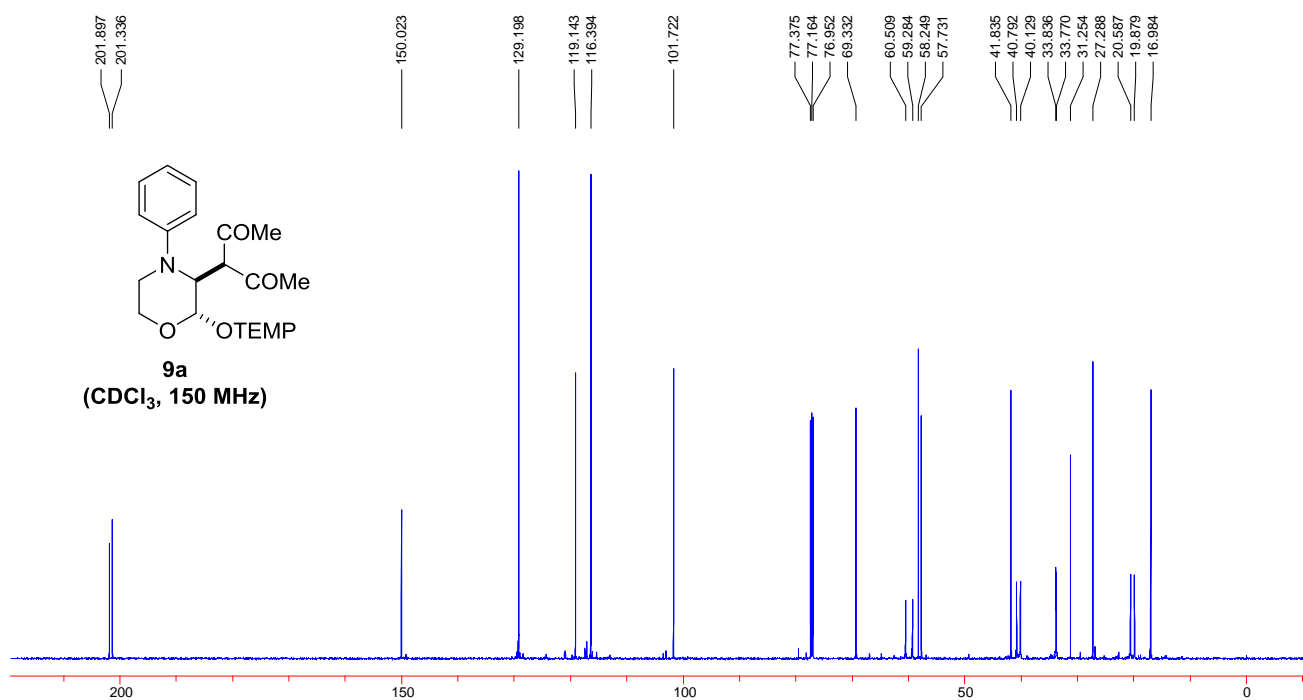

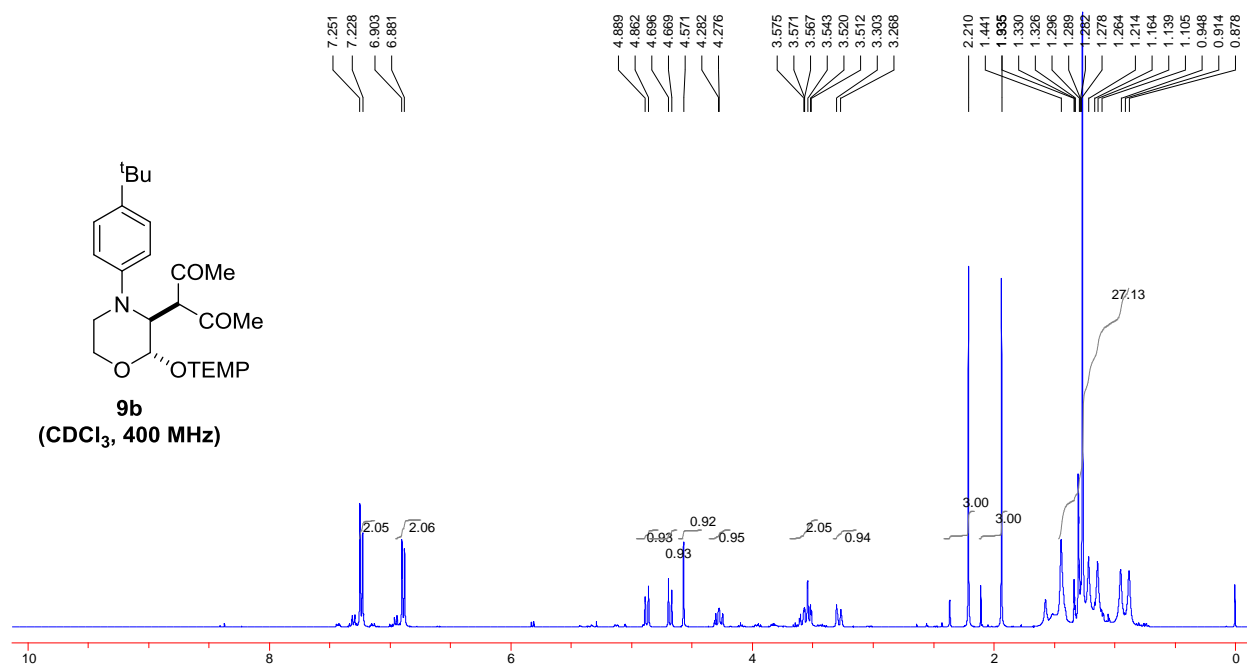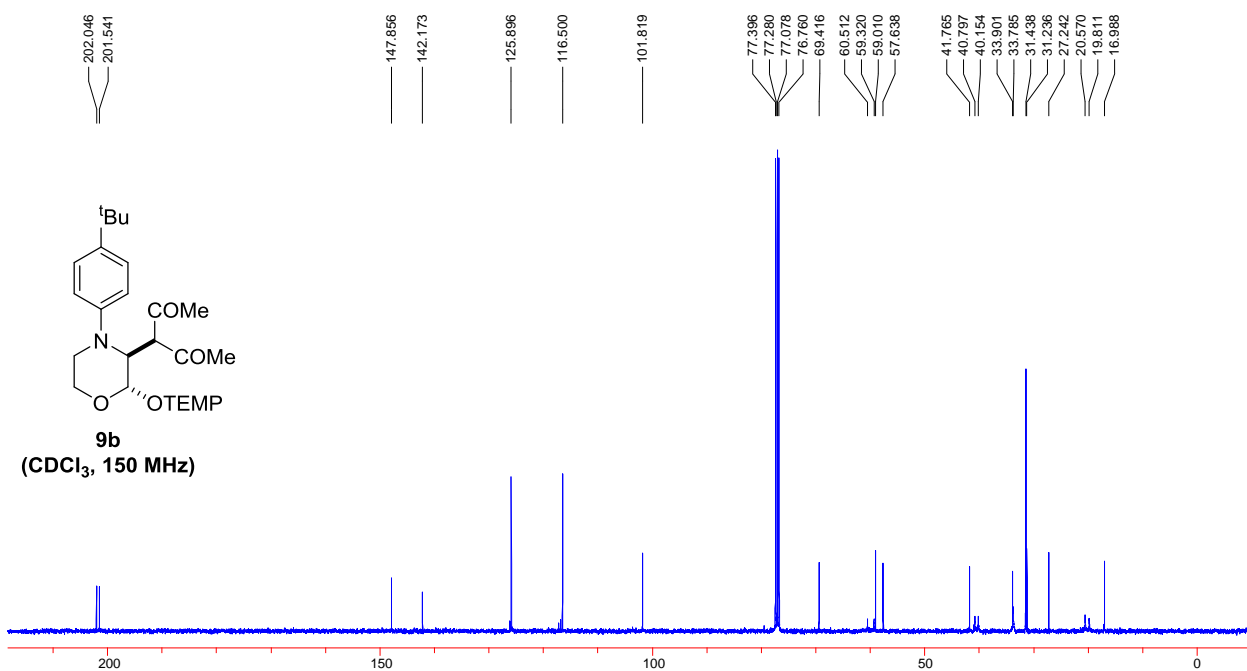

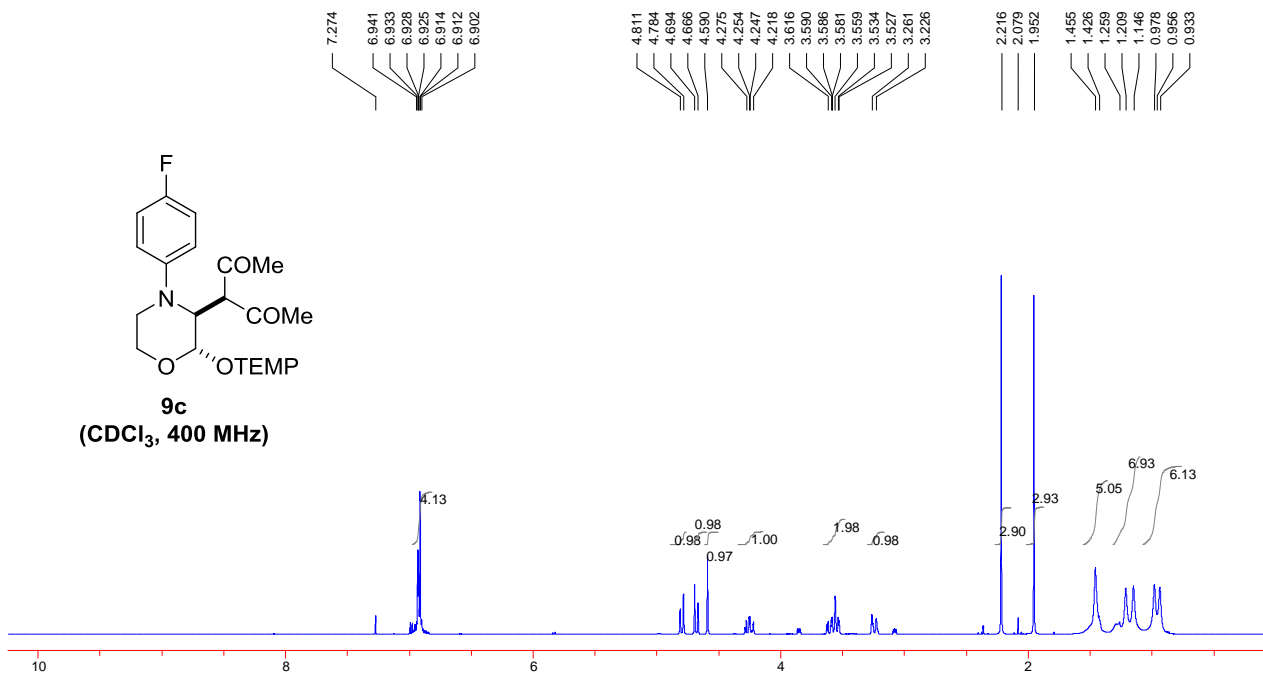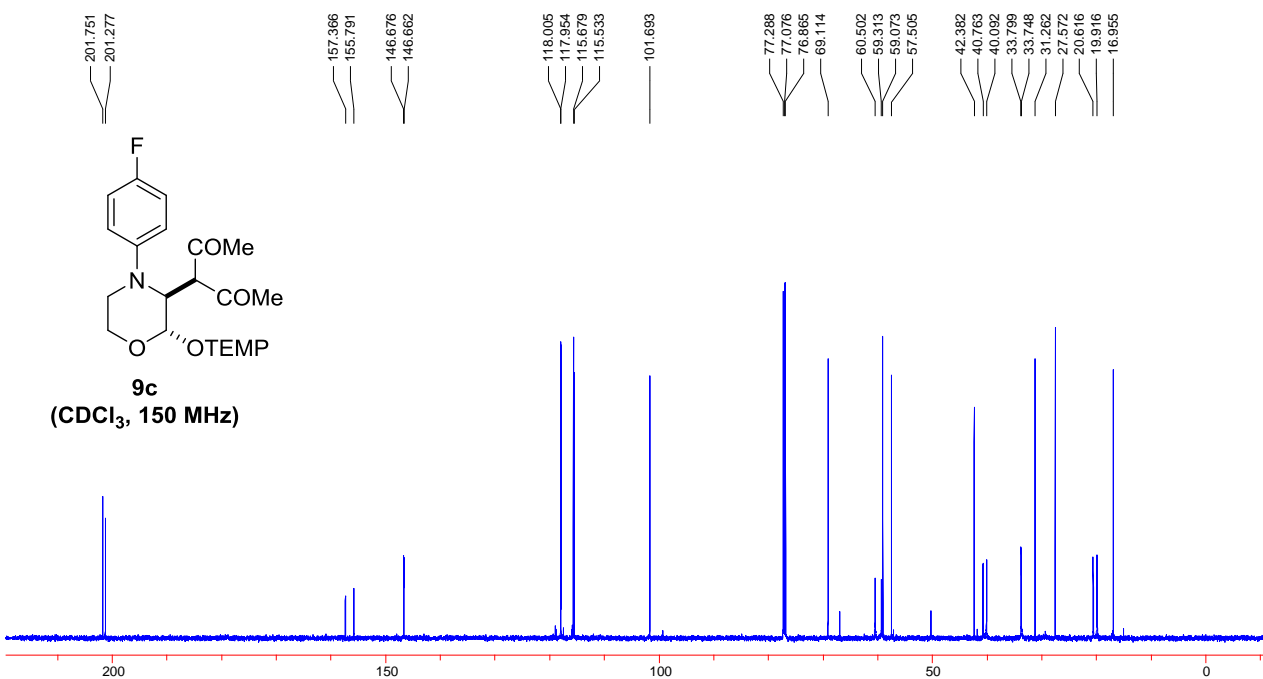

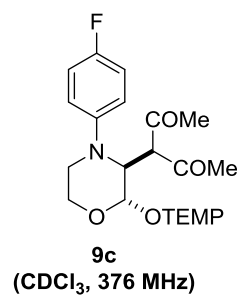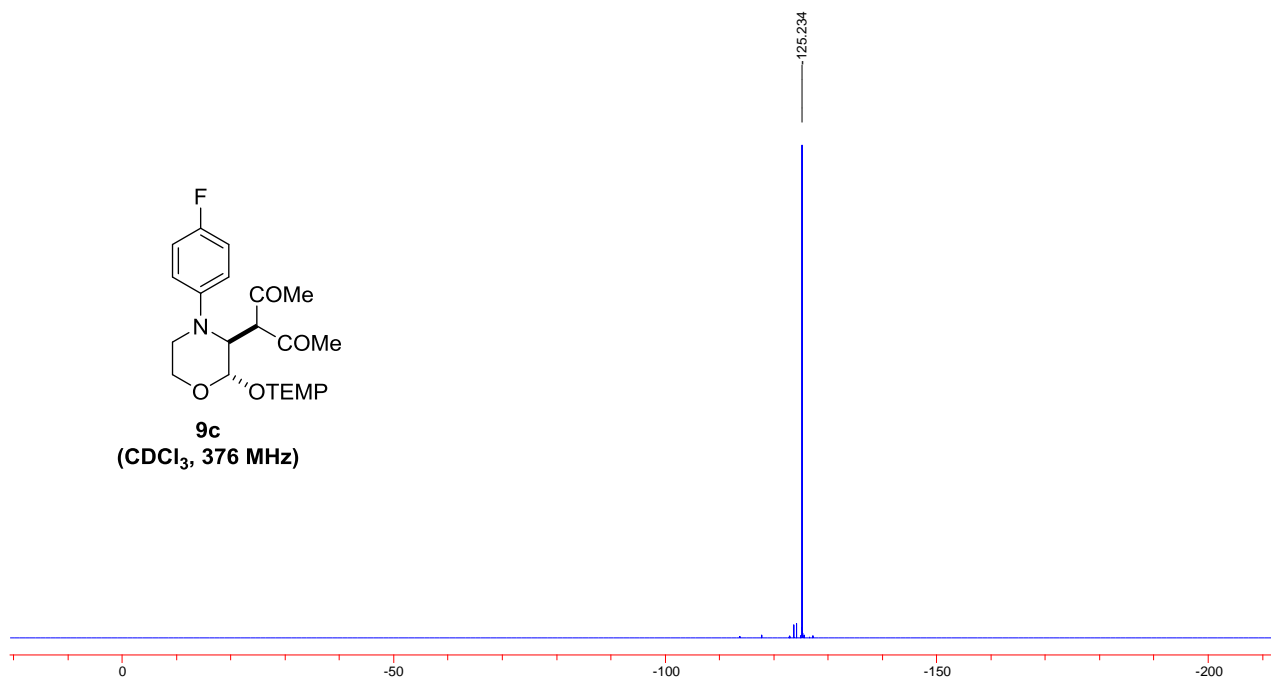

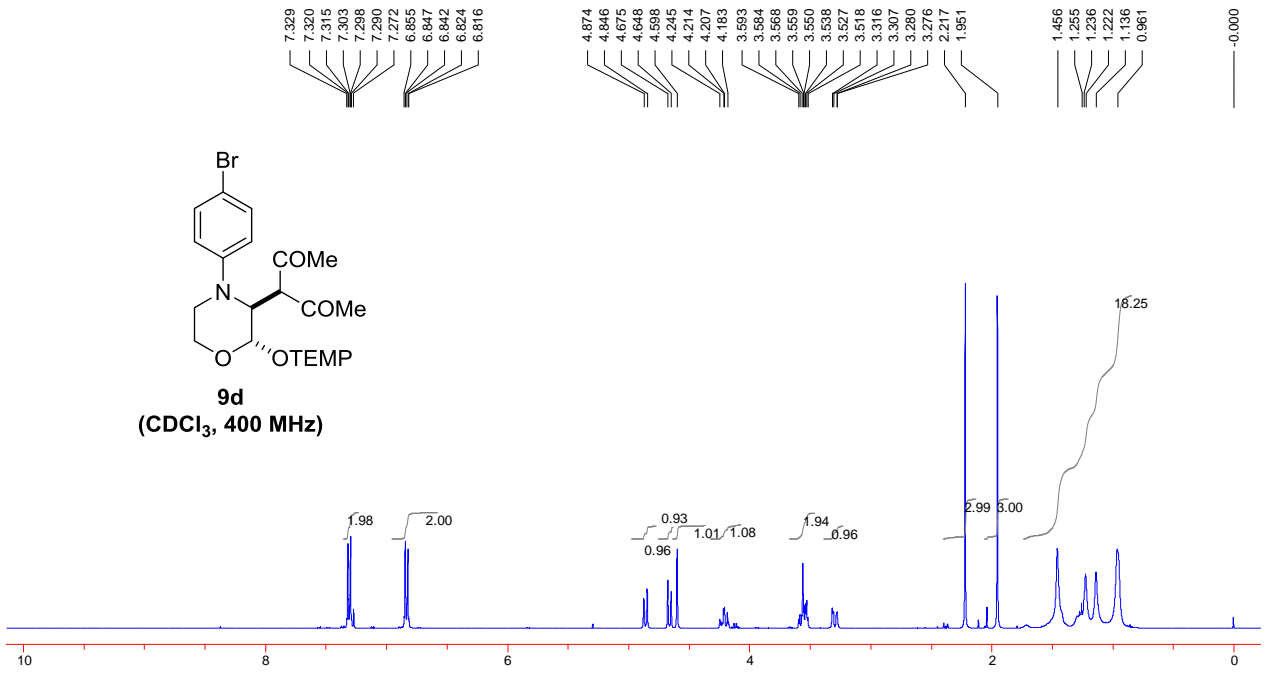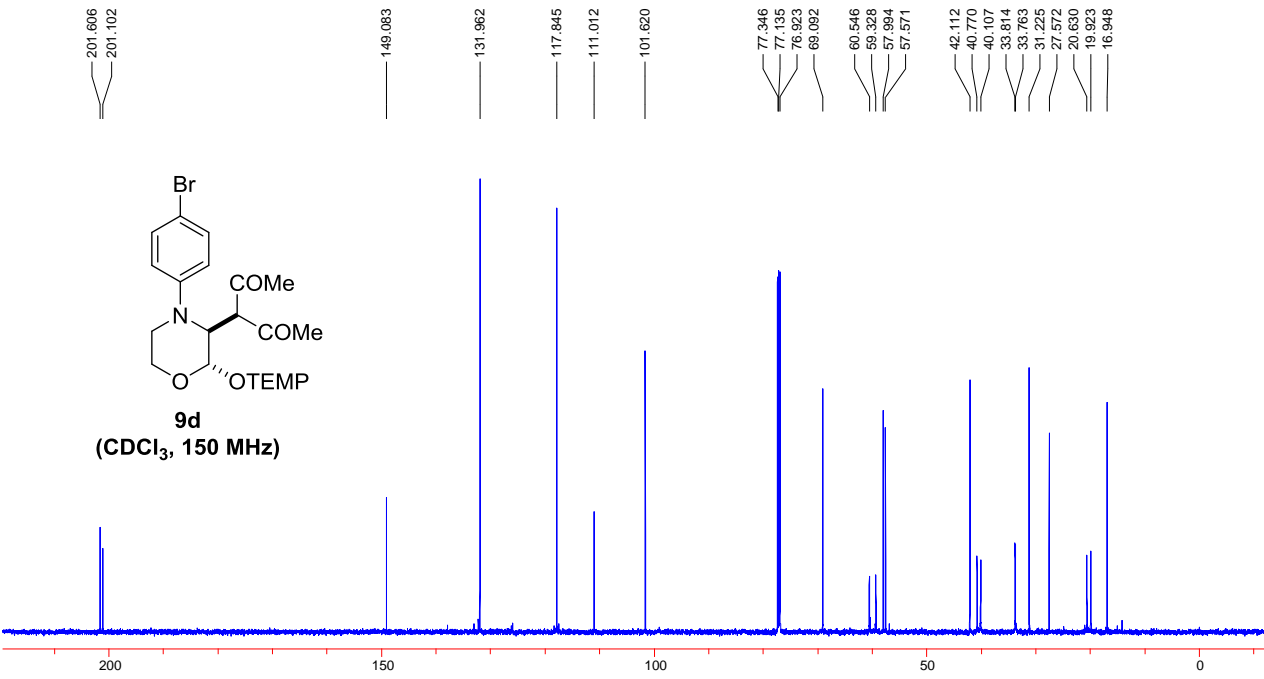



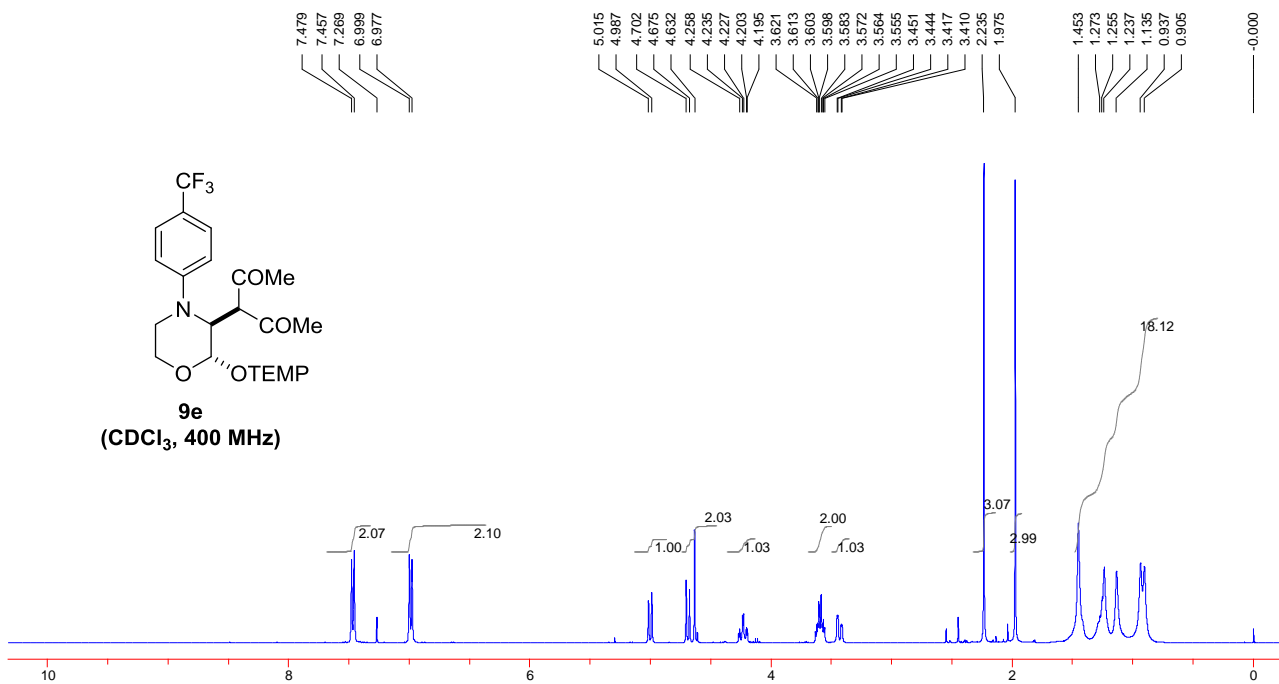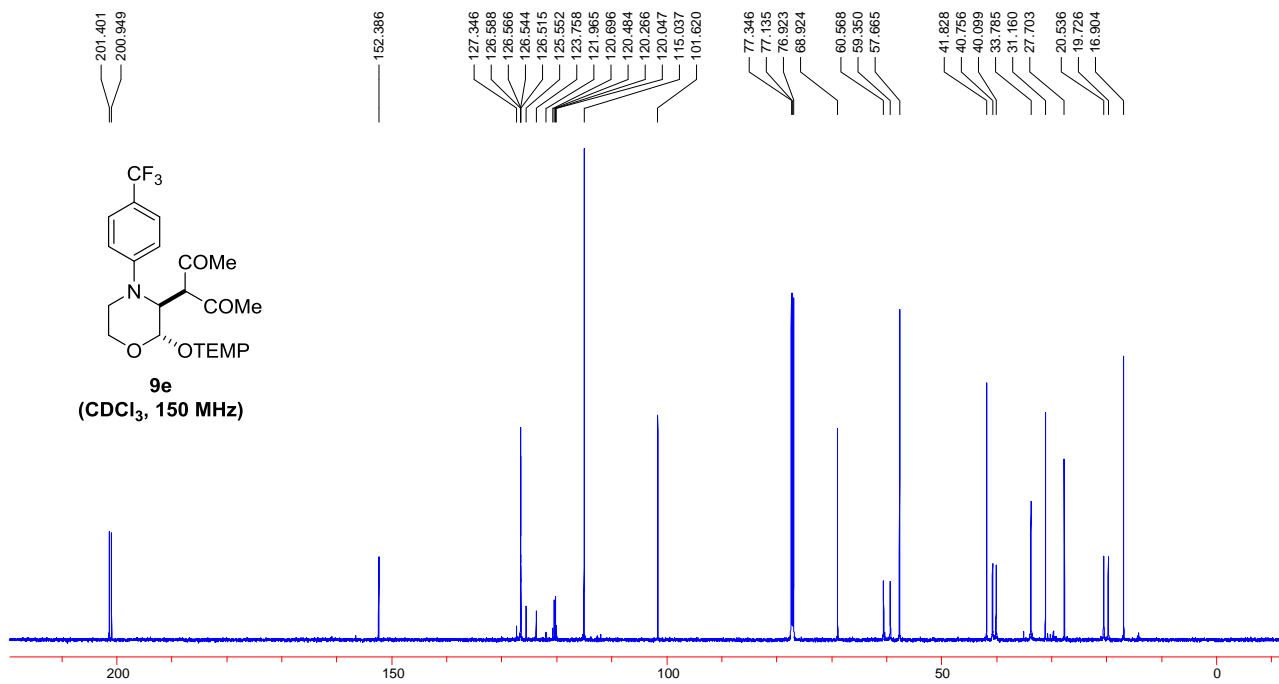

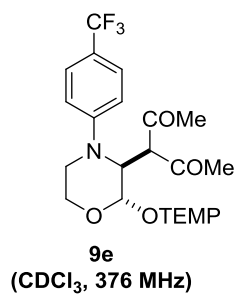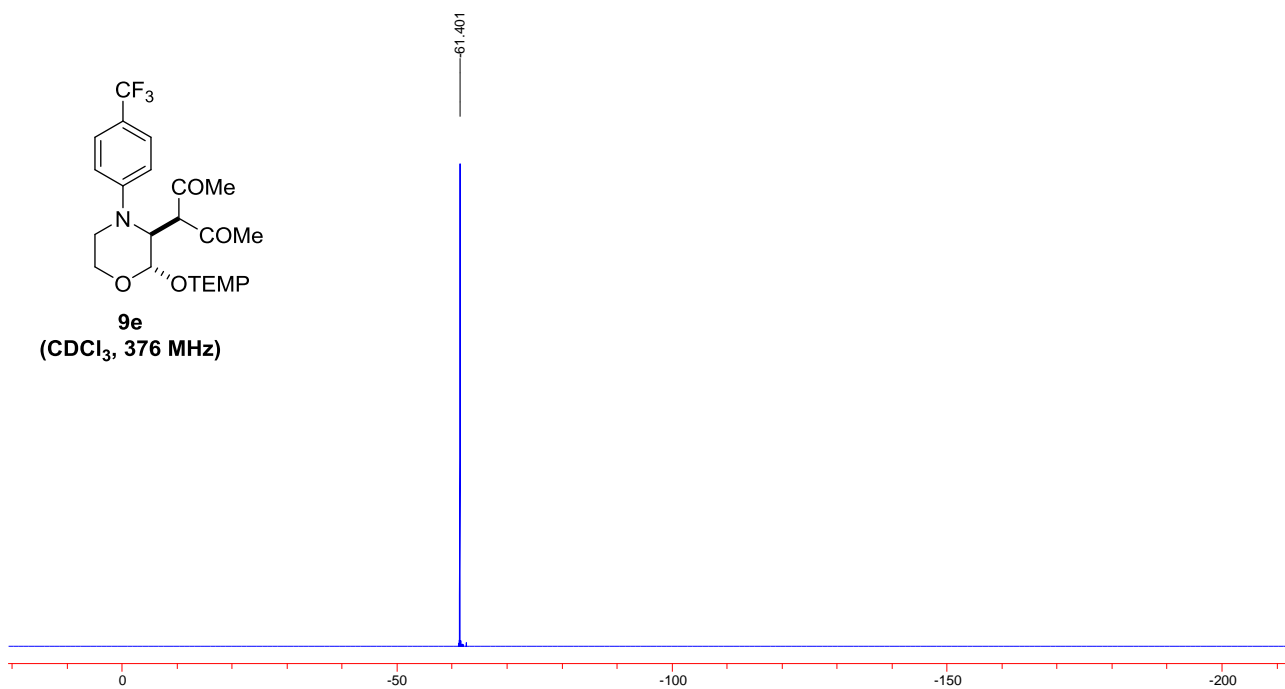

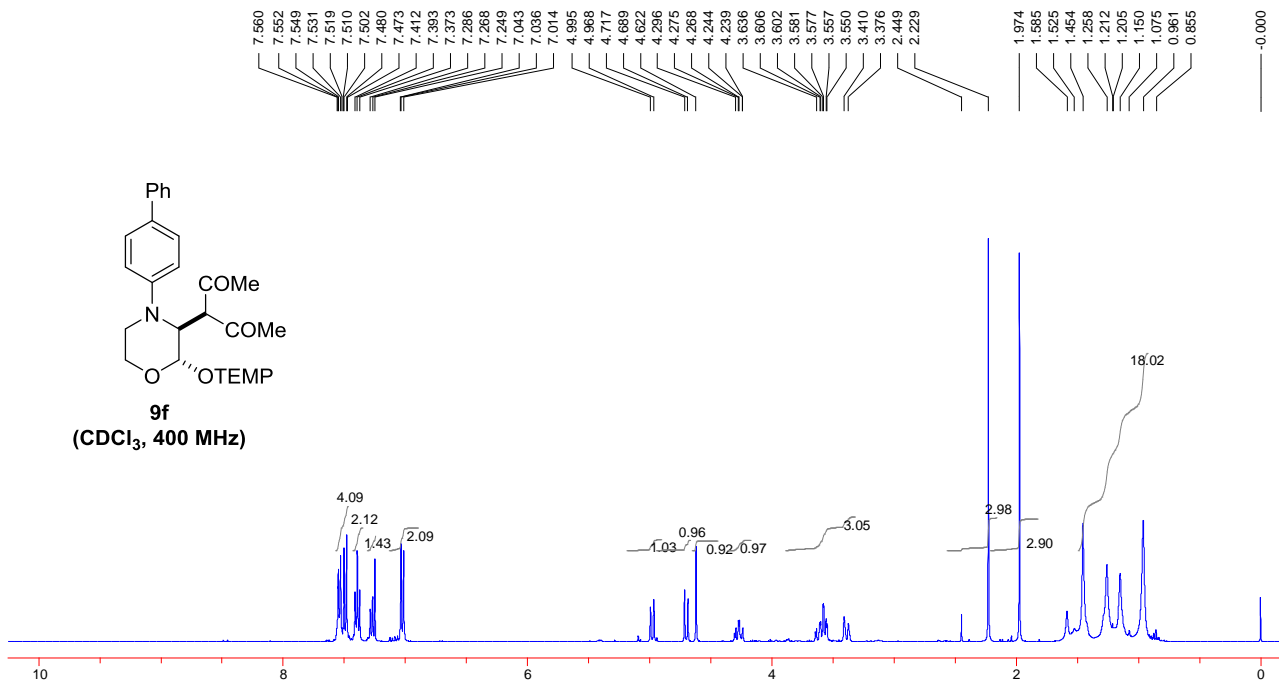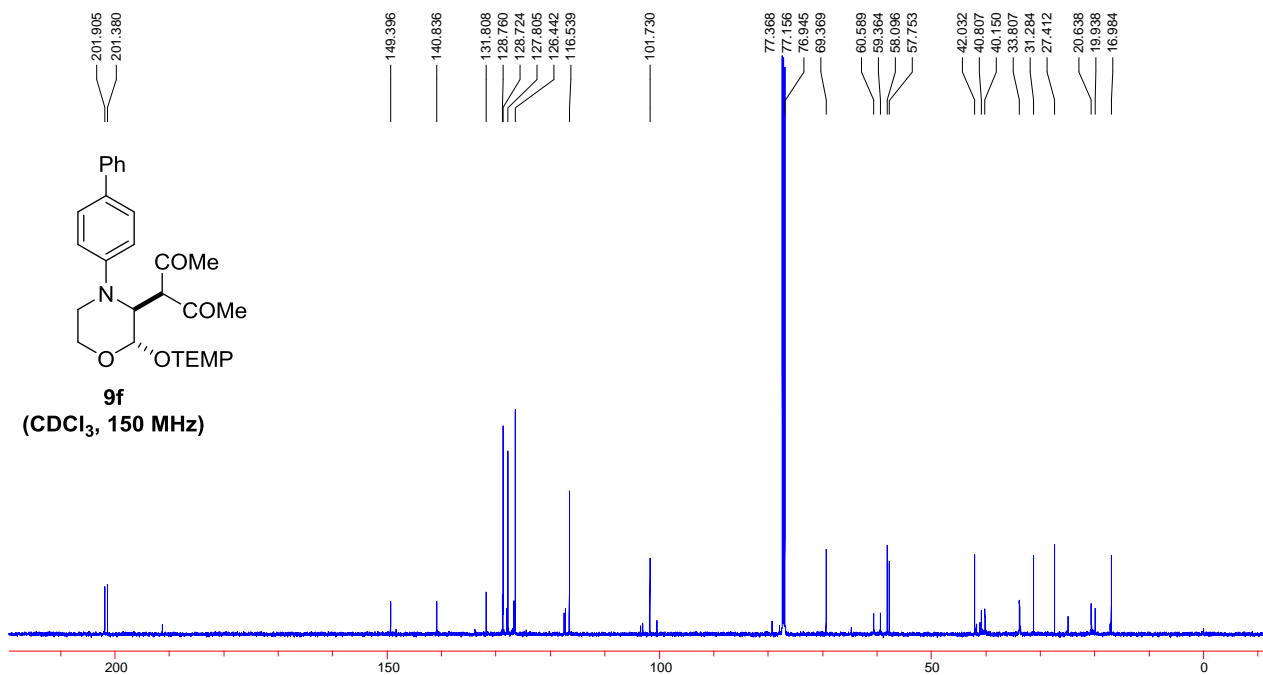

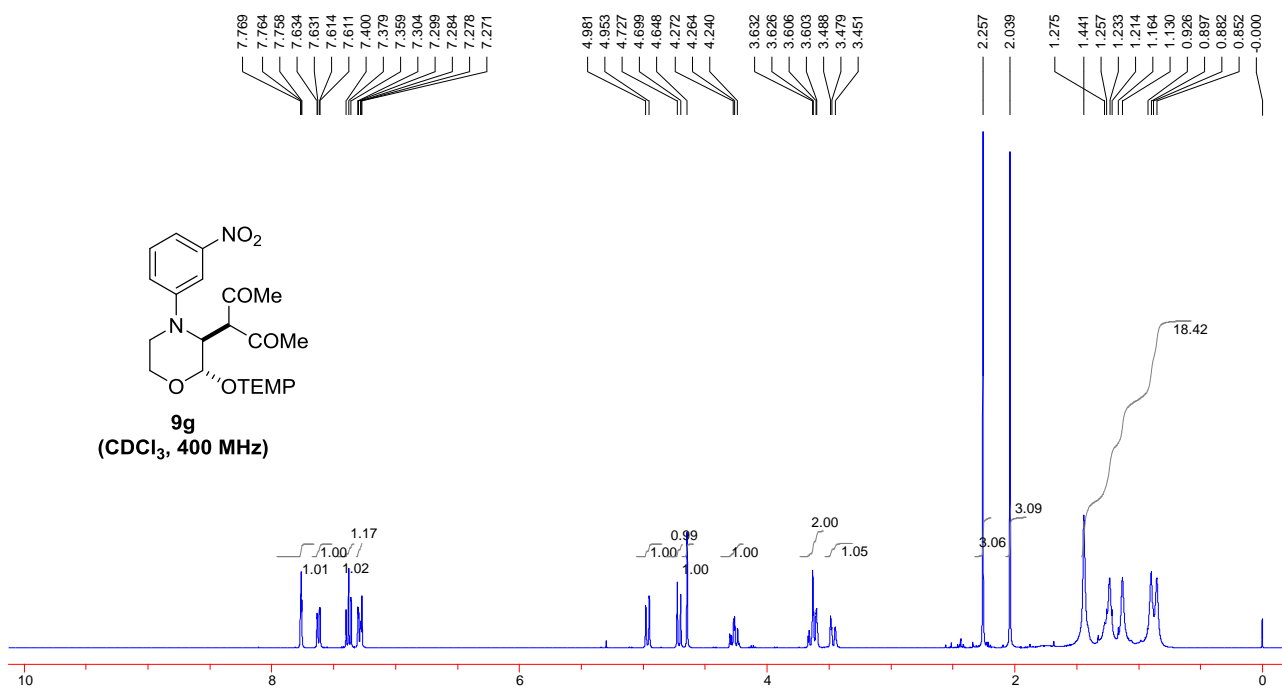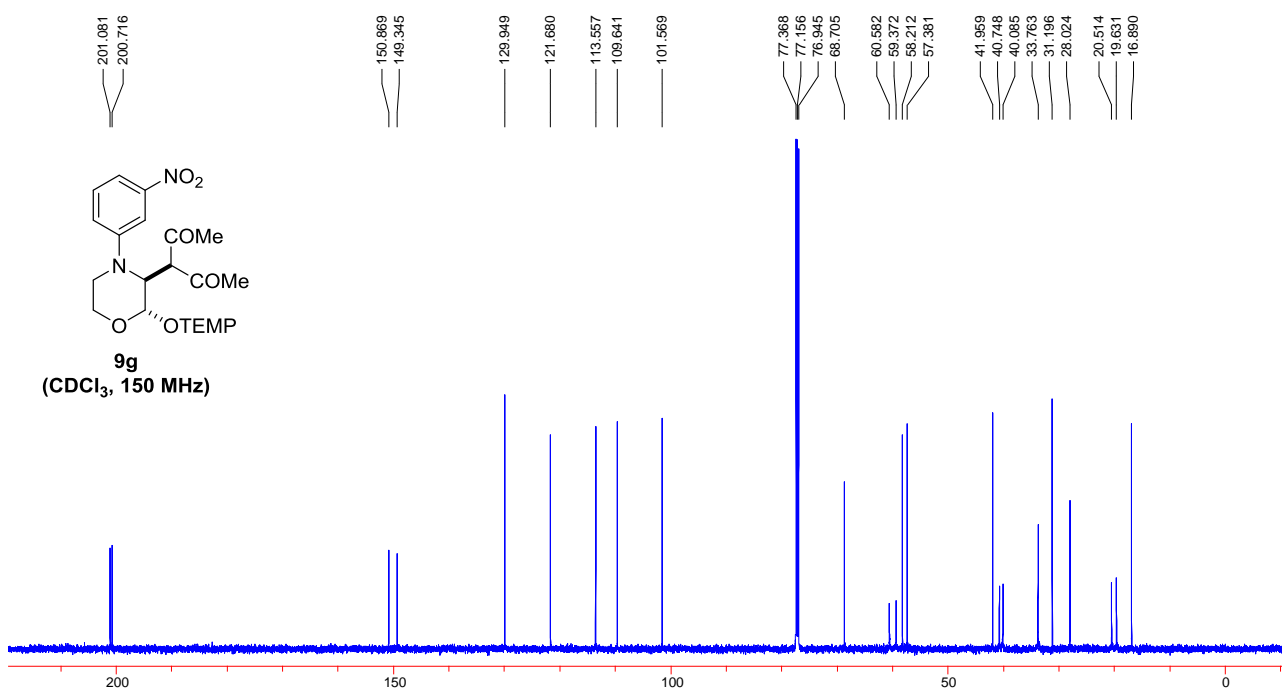

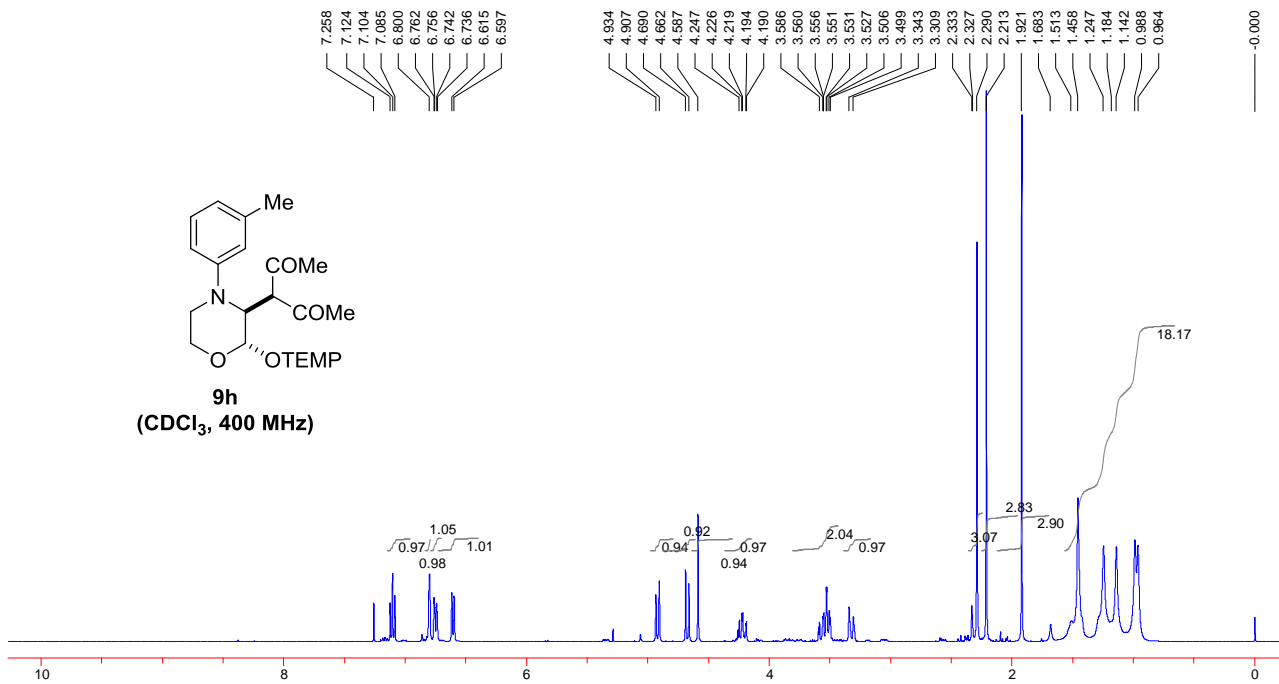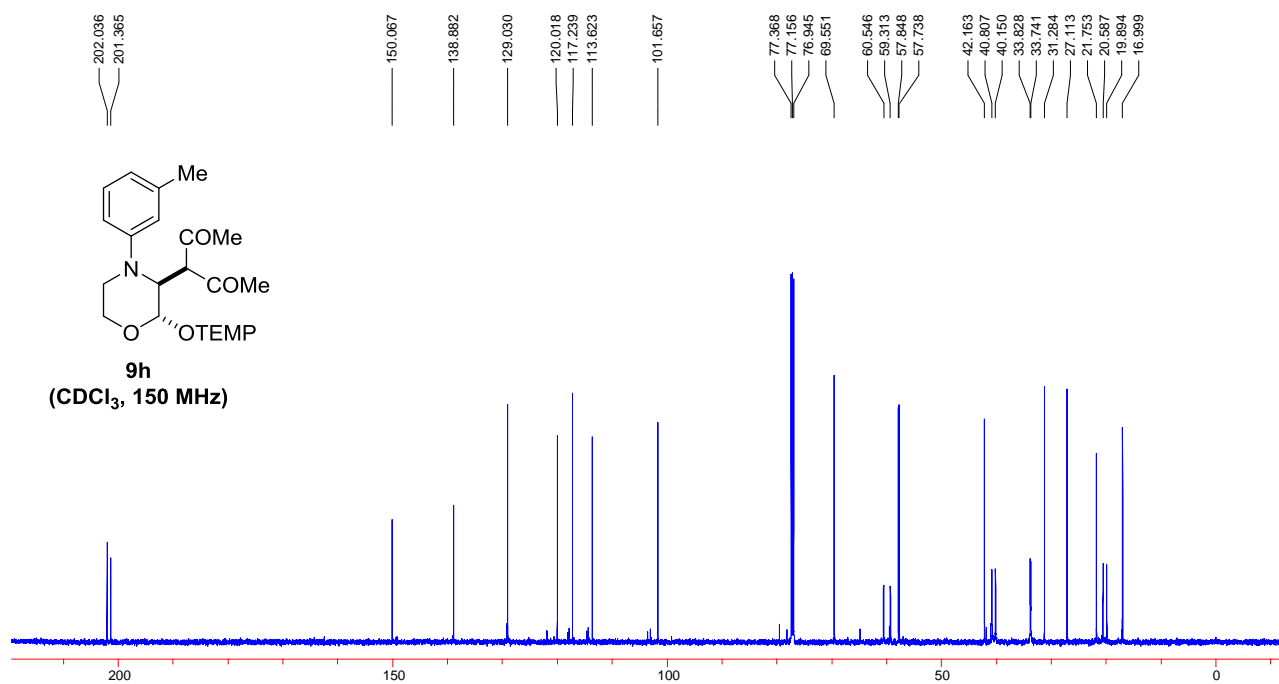

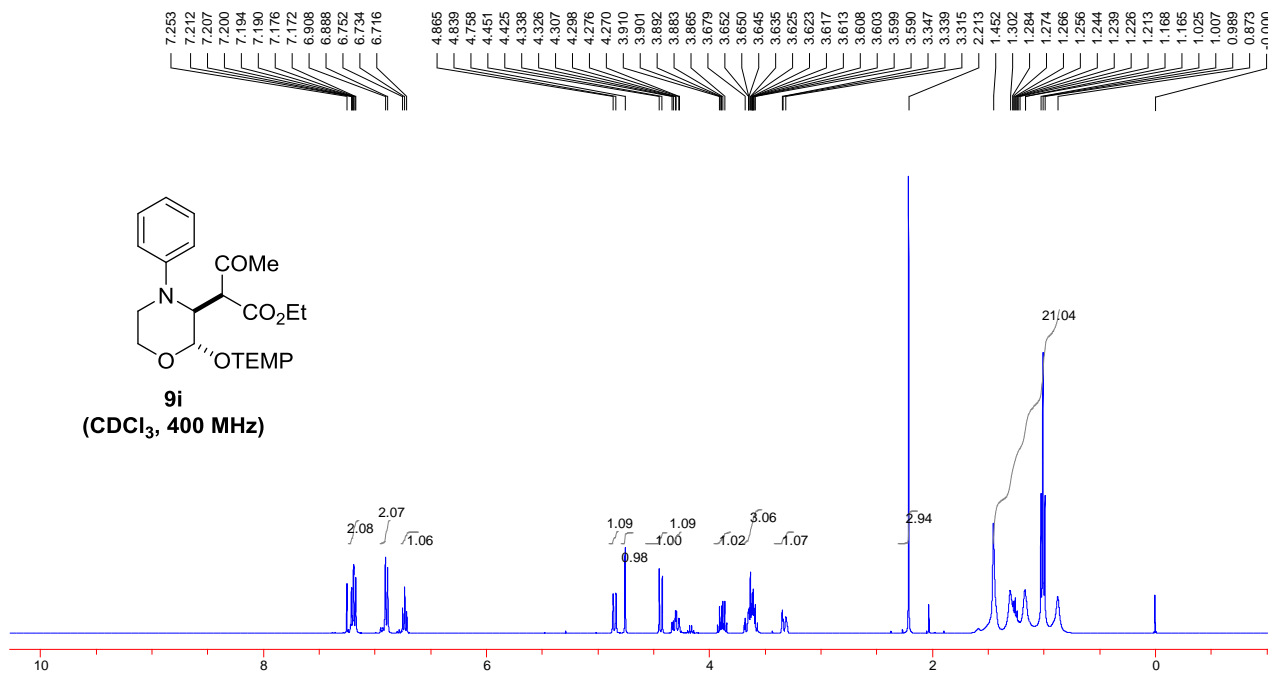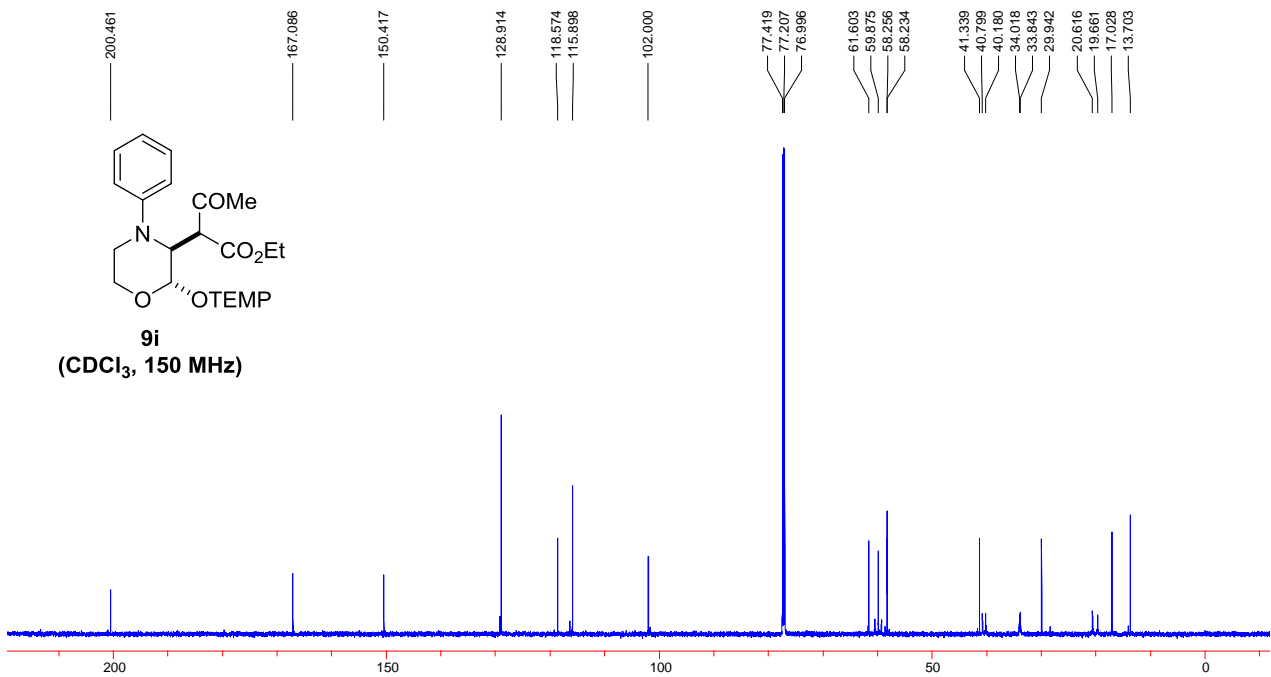

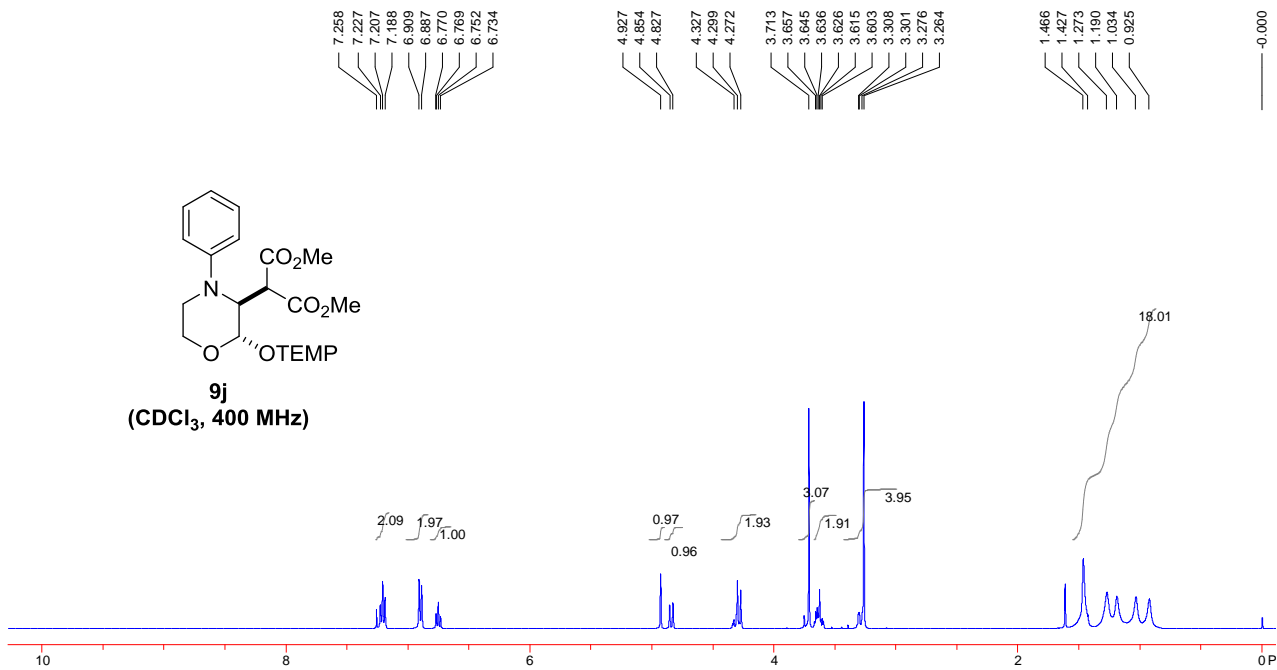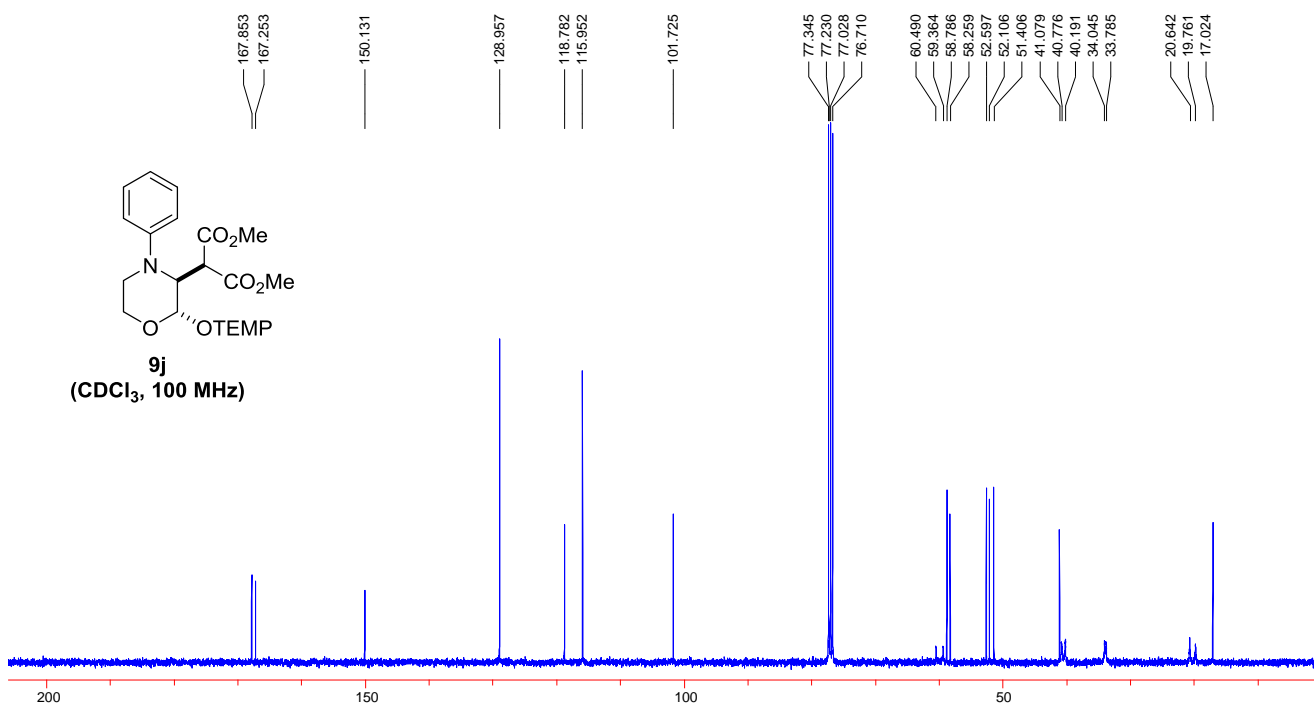

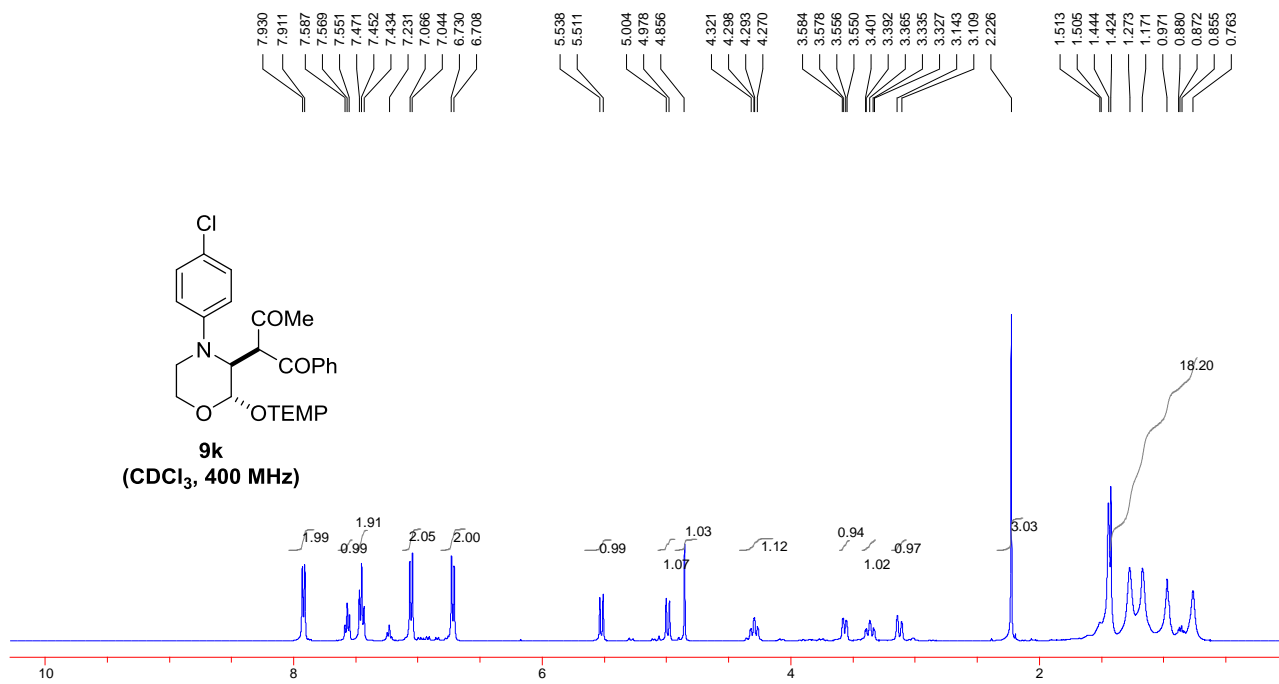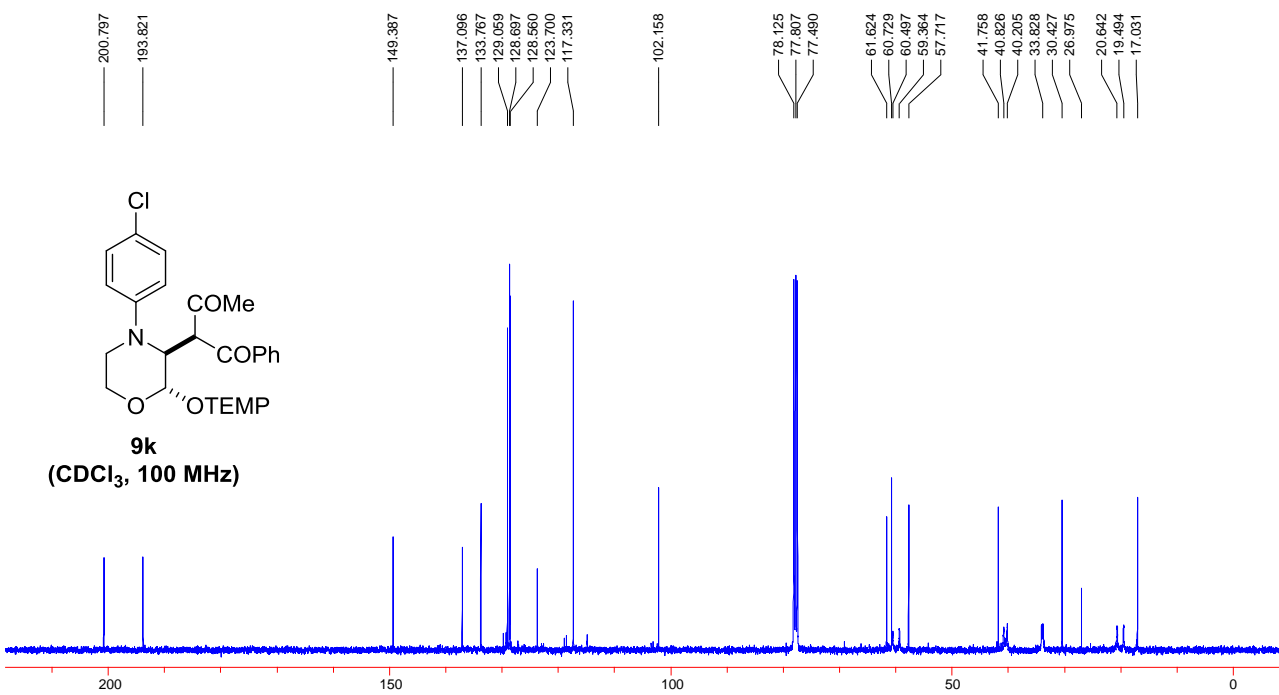



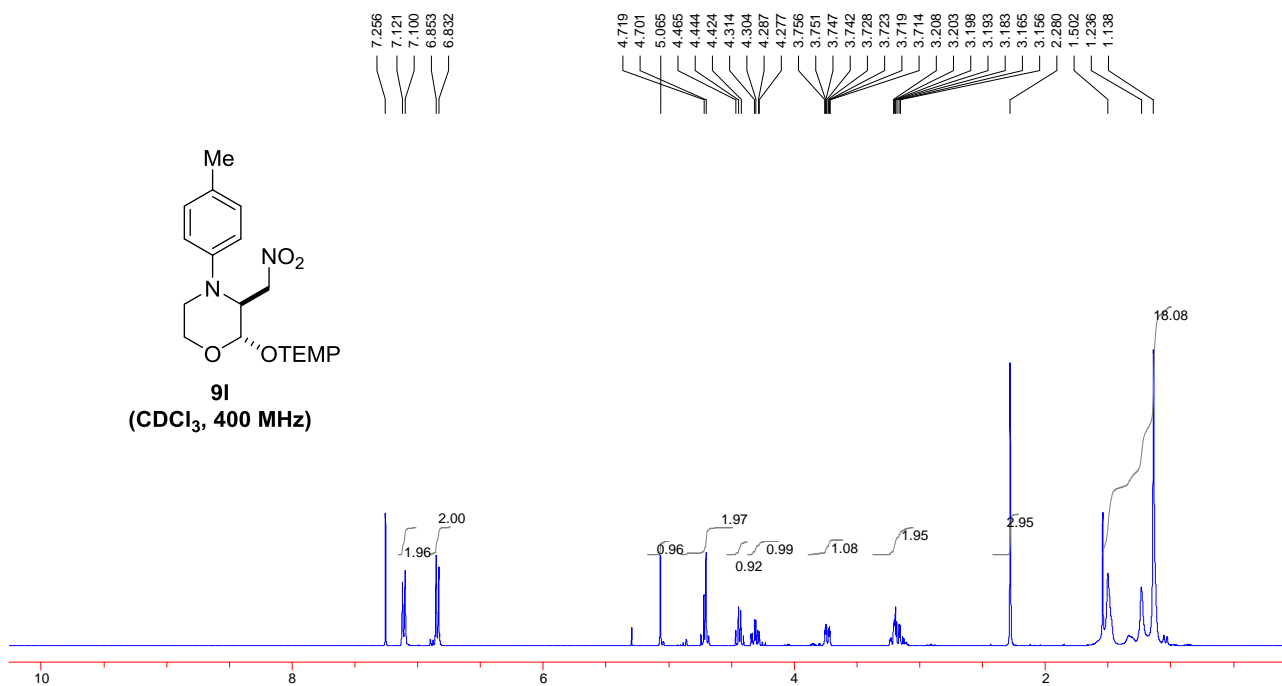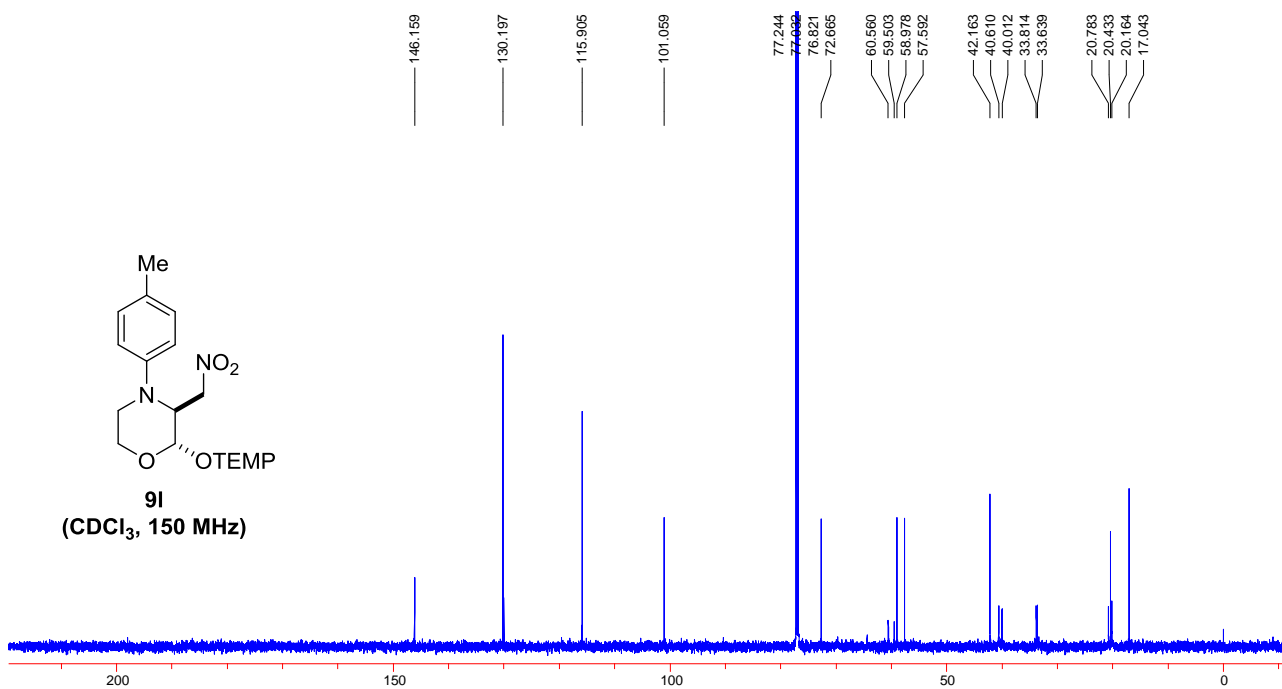

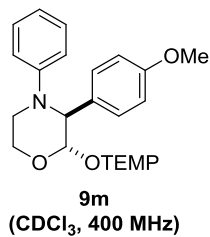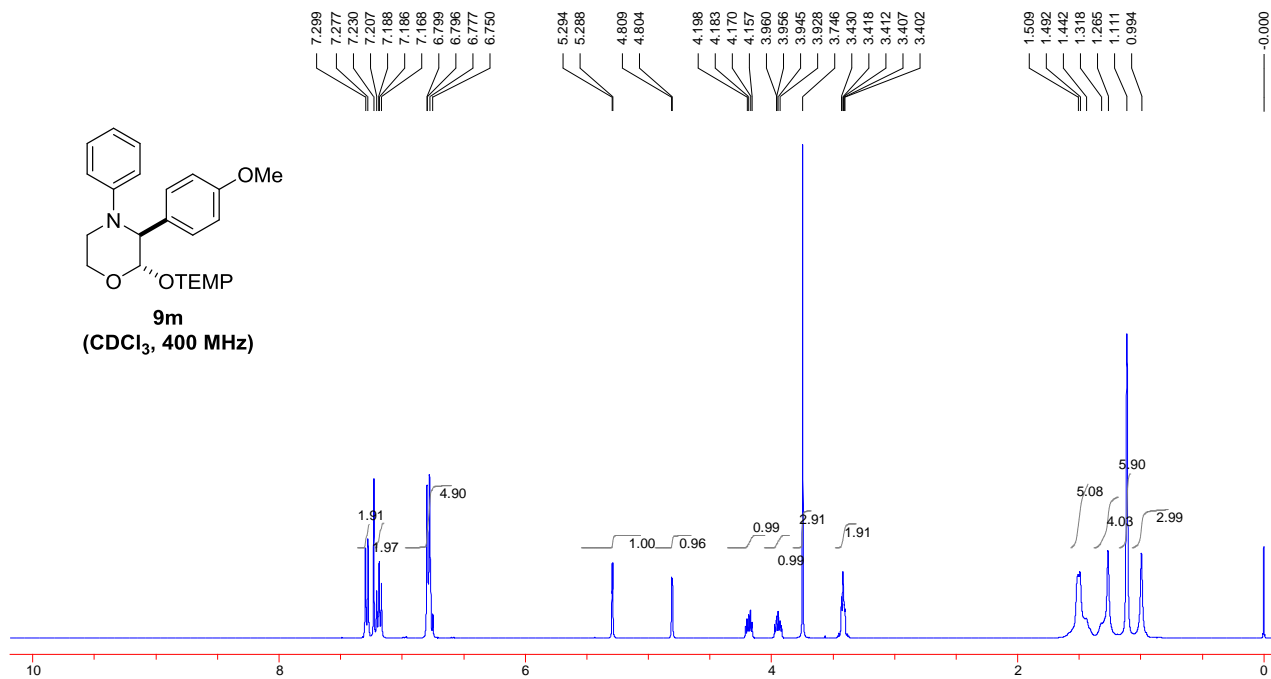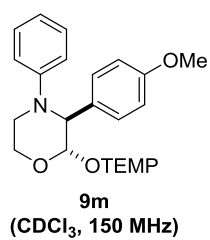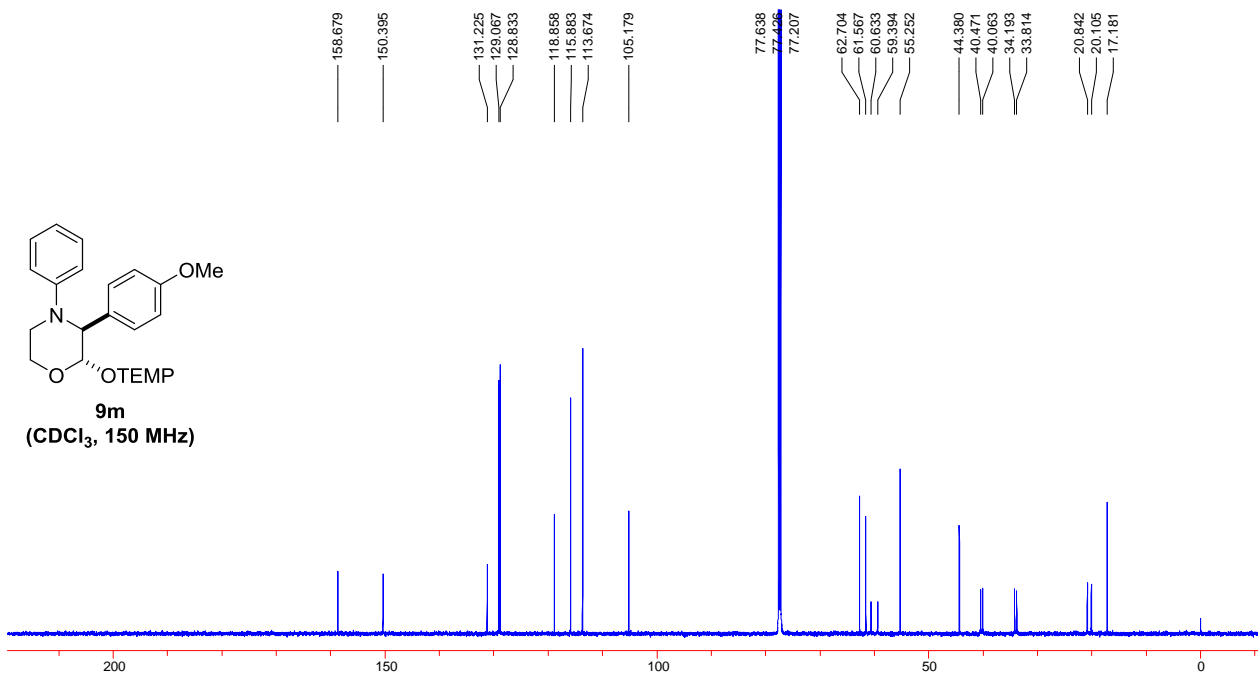

7.277  
7.272  
7.266  
7.258  
7.255  
7.250  
7.241  
7.236  
7.231  
6.981  
6.980  
6.840  
6.813  
6.795  
6.777  
5.763  
5.747  
5.741  
5.737  
5.726  
5.721  
5.716  
5.704  
5.689  
5.683  
5.683  
5.679  
5.674  
5.658  
5.658  
5.644  
5.641  
5.641  
5.095  
5.095  
5.009  
5.009  
4.978  
4.283  
4.274  
4.267  
4.246  
4.227  
4.218  
4.046  
4.037  
4.021  
4.021  
3.741  
3.735  
3.732  
3.727  
3.713  
3.708  
3.695  
3.689  
3.311  
3.301  
3.281  
3.272  
3.272  
3.252  
3.243  
3.213  
3.205  
3.199  
3.189  
3.183  
3.177  
3.169  
2.566  
2.566  
2.489  
2.477  
2.466  
2.442  
2.235  
2.225  
2.224  
2.220  
2.215  
2.209  
2.205  
2.200  
2.186  
2.186  
2.181  
2.175  
1.498  
1.326  
1.326  
1.290  
1.284  
1.241  
1.125

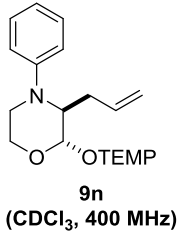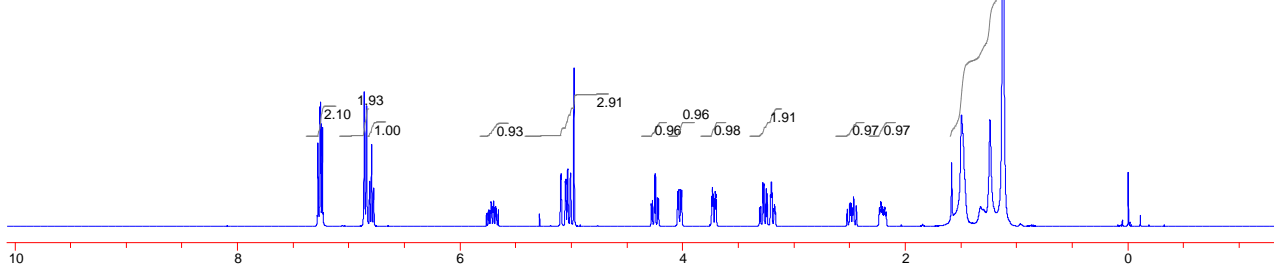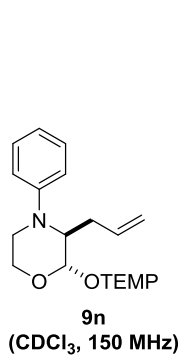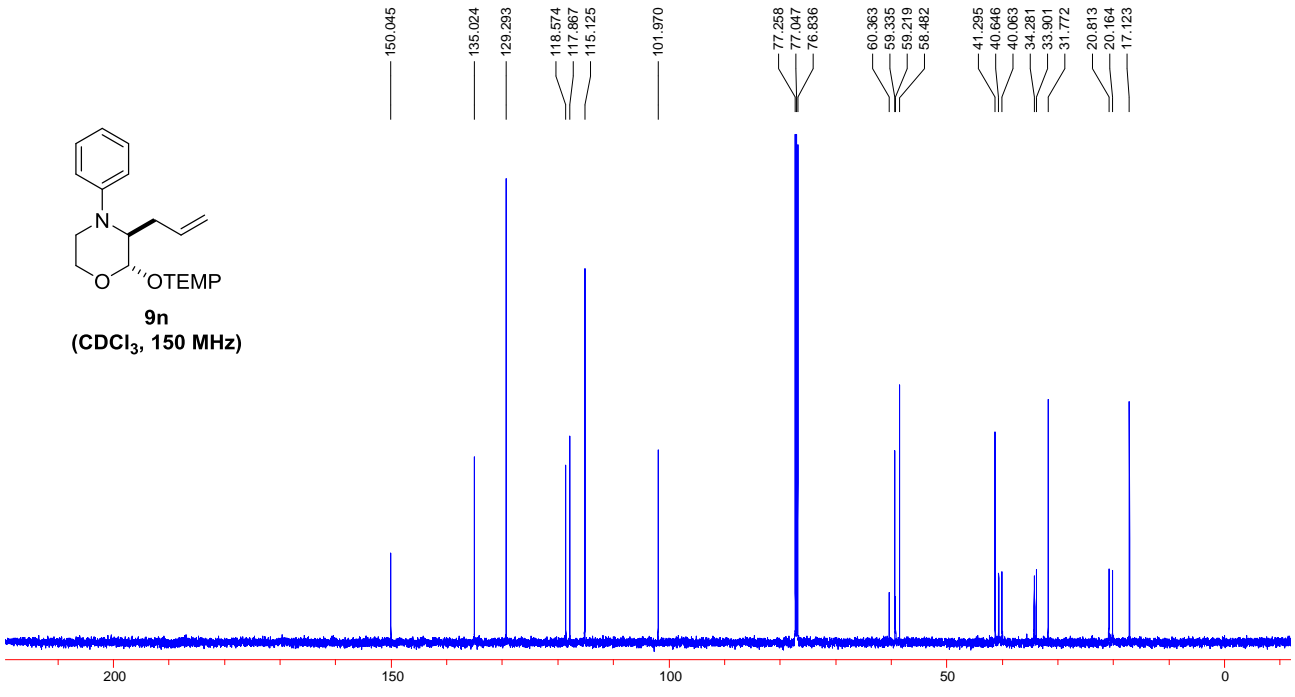

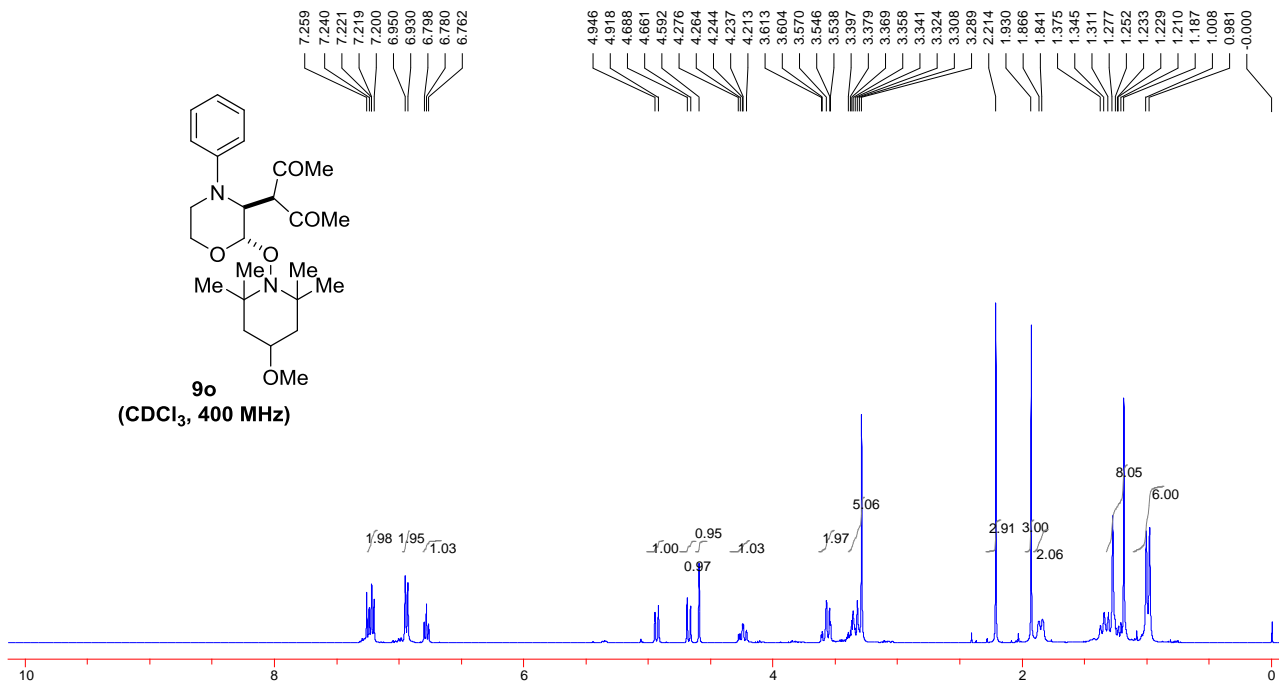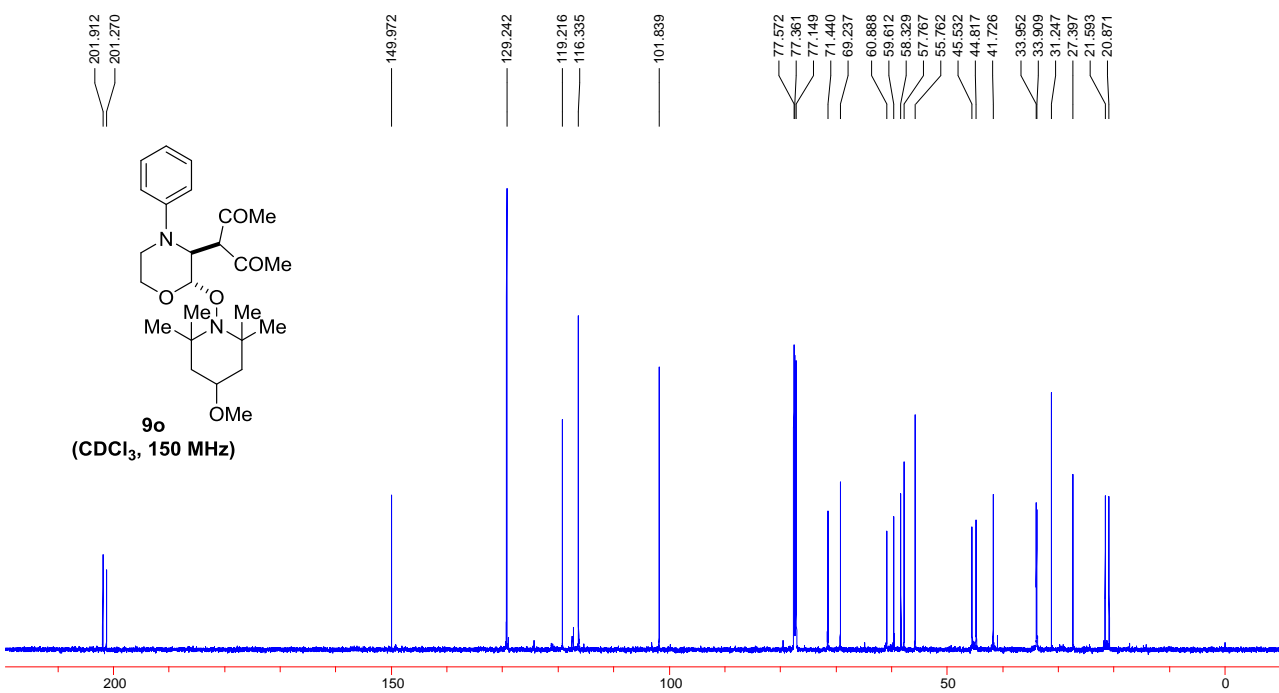

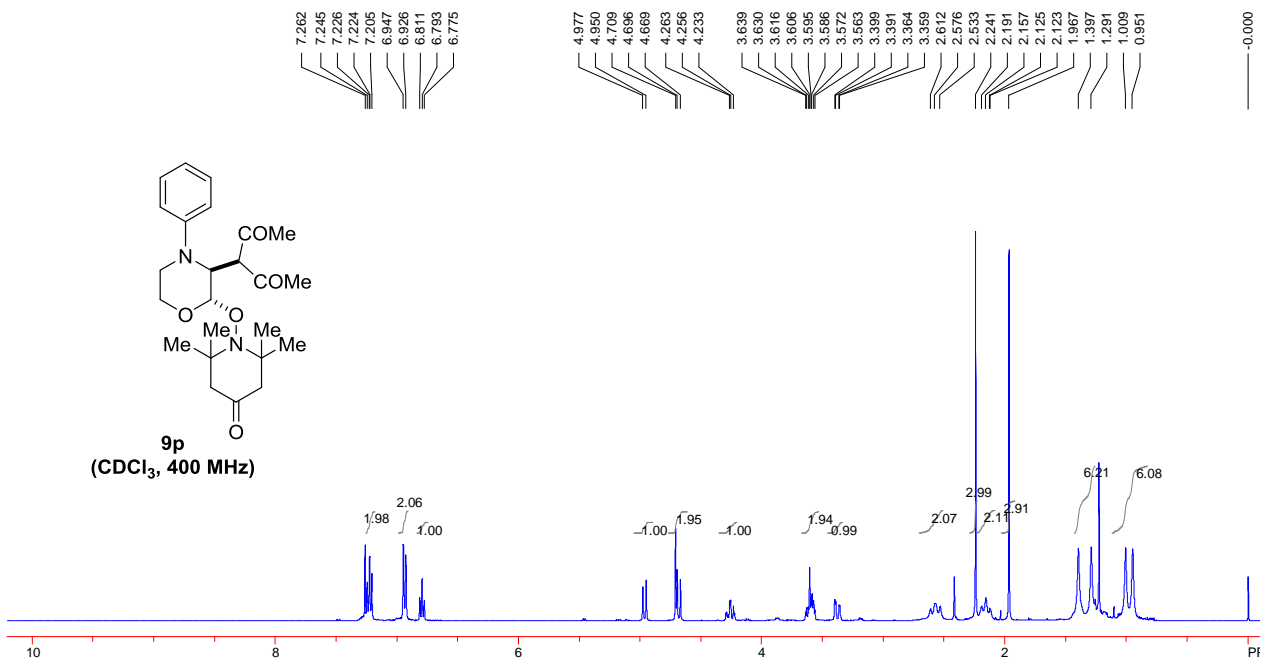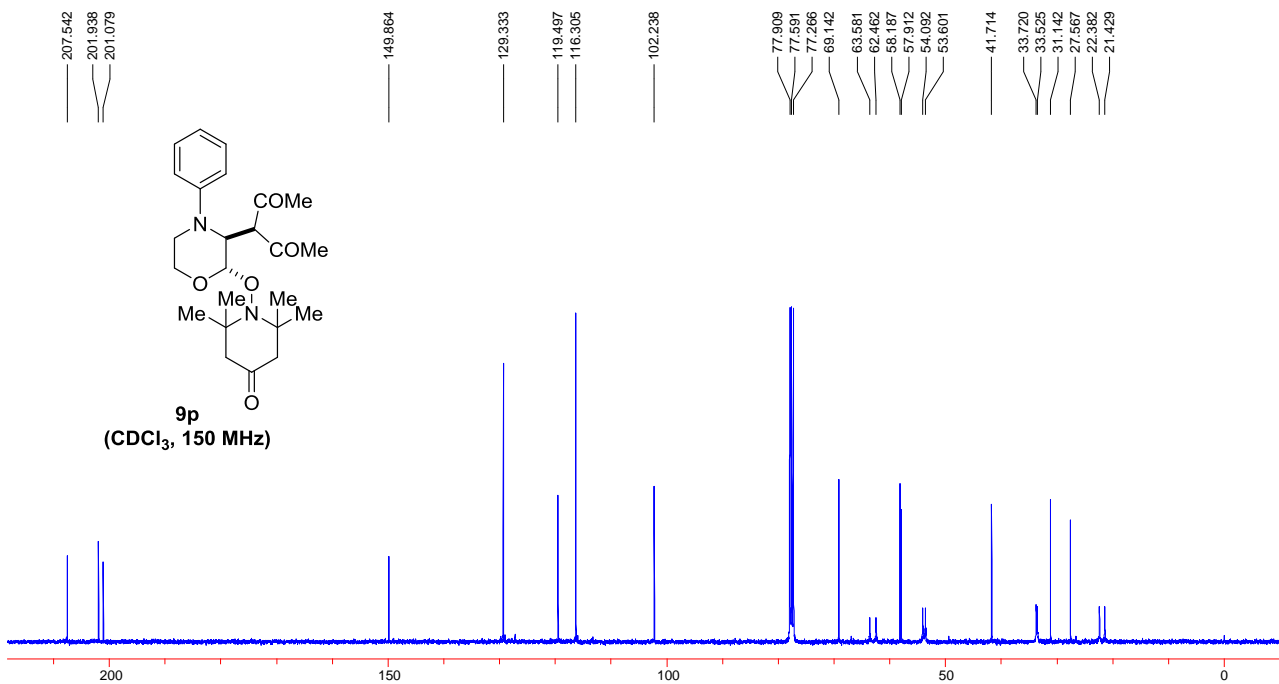

7.267  
7.239  
7.220  
7.218  
7.199  
6.946  
6.926  
6.900  
6.782  
6.764

4.940  
4.912  
4.688  
4.661  
4.588  
4.277  
4.246  
4.265  
4.239  
4.215  
4.142  
4.124  
4.106  
4.088  
3.909  
3.881  
3.852  
3.611  
3.602  
3.573  
3.548  
3.544  
3.362  
3.353  
3.327  
2.219  
2.034  
1.940  
1.881  
1.876  
1.871  
1.841  
1.814  
1.806  
1.793  
1.782  
1.445  
1.419  
1.392  
1.270  
1.252  
1.181  
1.004  
0.970

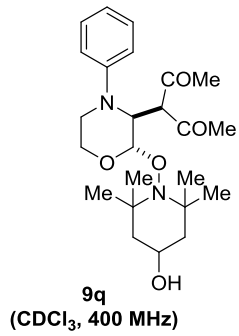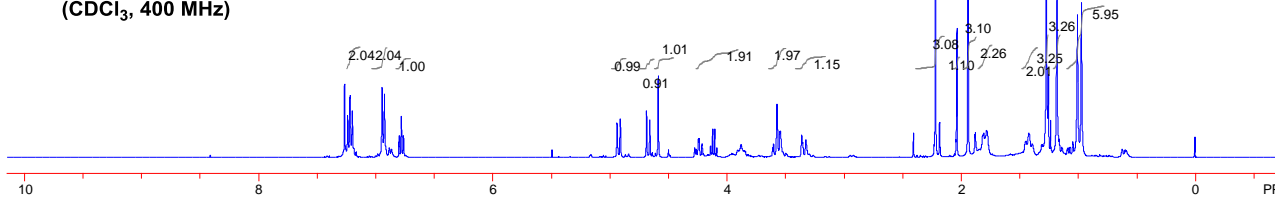

201.985  
201.343

149.936

129.242

119.252

116.321

101.839

77.368

77.156

76.945

69.179

62.799

60.998

59.707

58.951

57.746

49.127

48.449

41.674

33.850

33.792

31.218

27.434

21.505

20.791

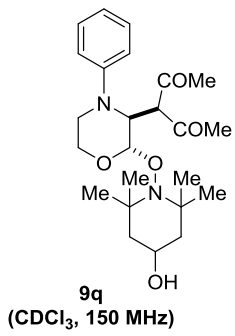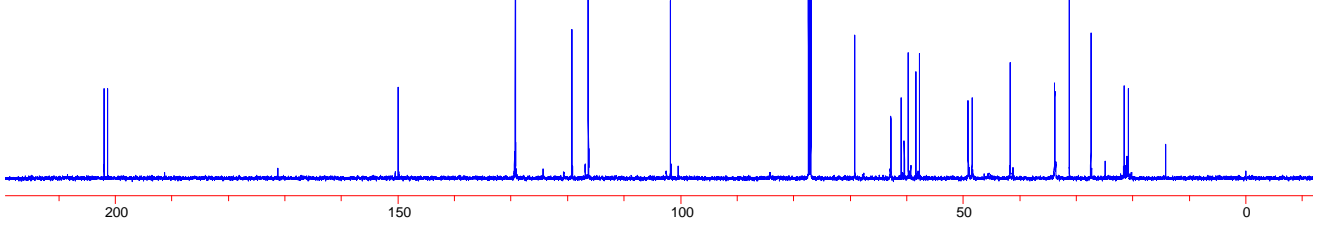

## VII. Copies of the NMR and HPLC Spectra of 10-13 and 15

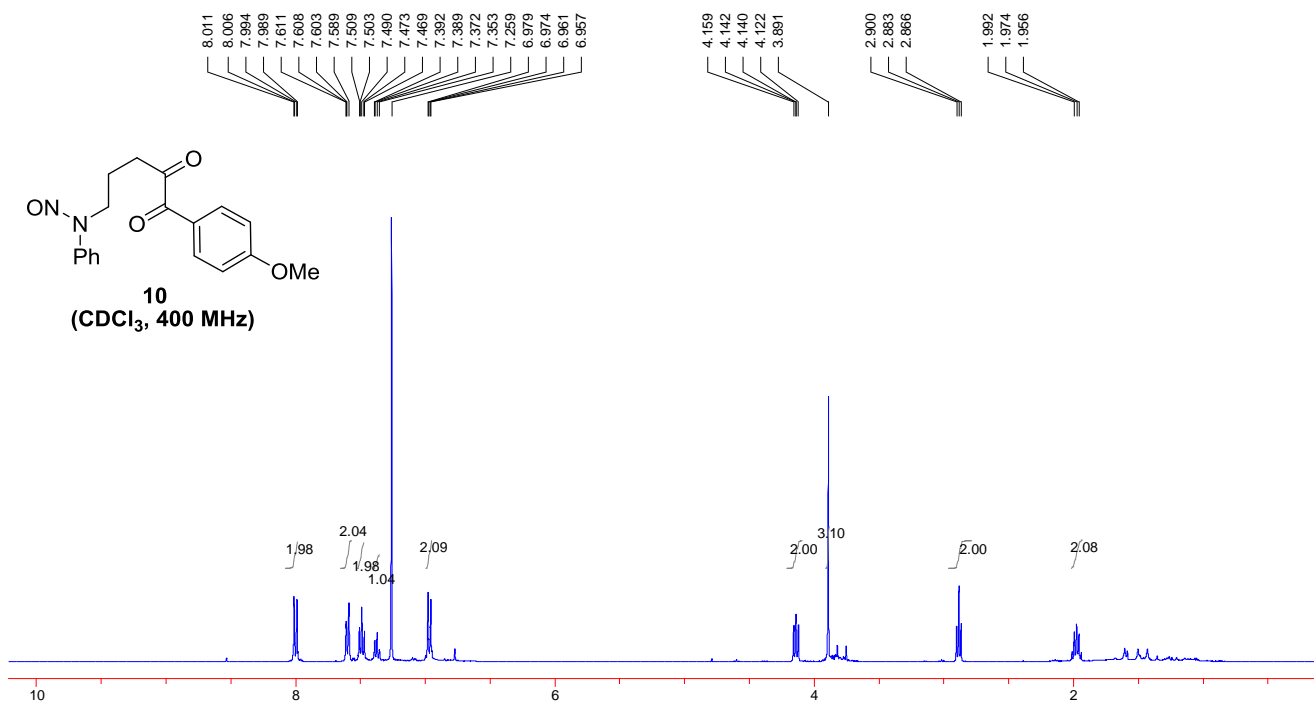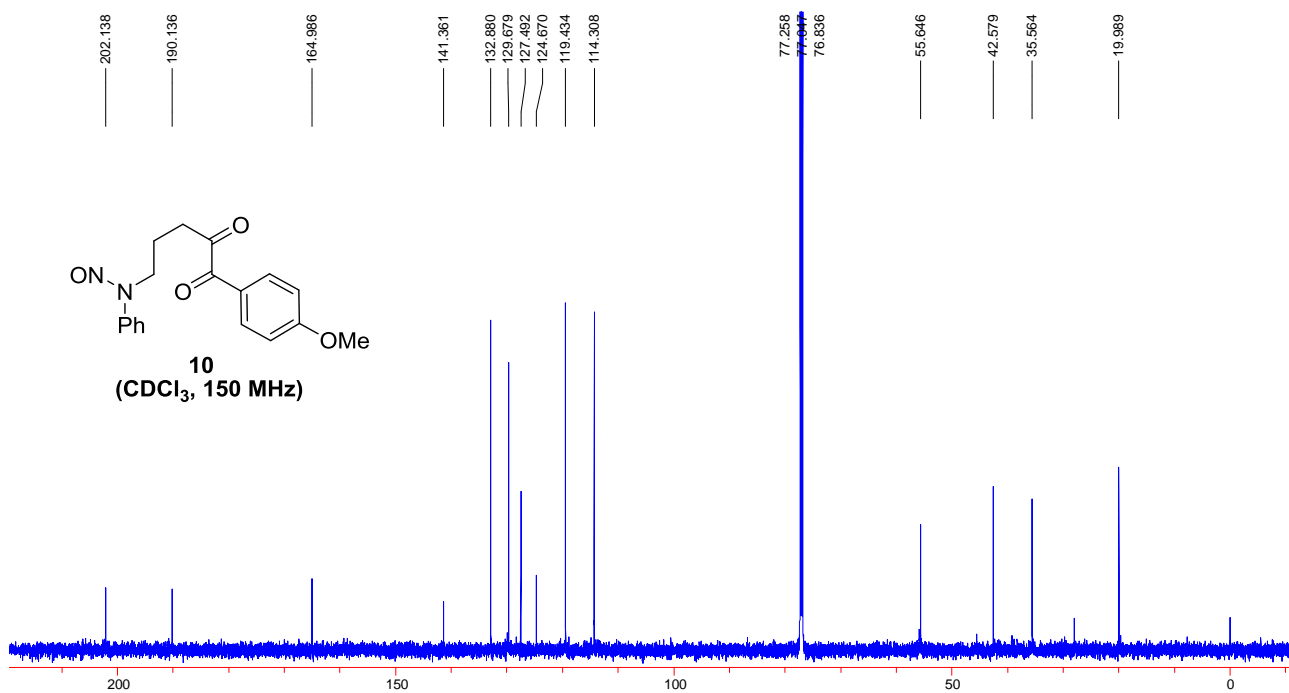

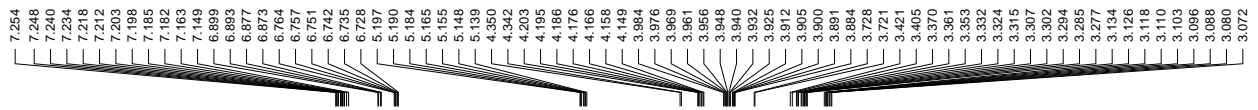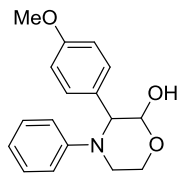

**11**  
(CDCl<sub>3</sub>, 400 MHz)

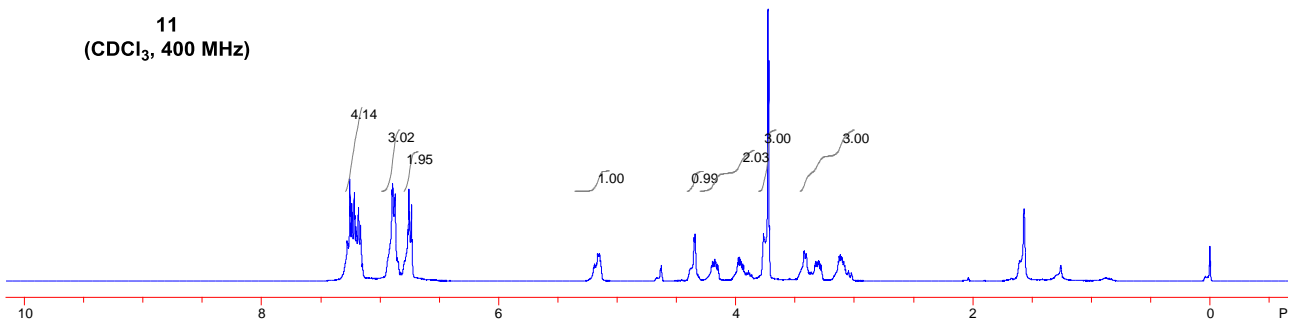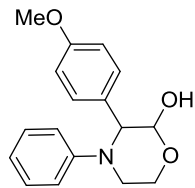

**11**  
(CDCl<sub>3</sub>, 100 MHz)

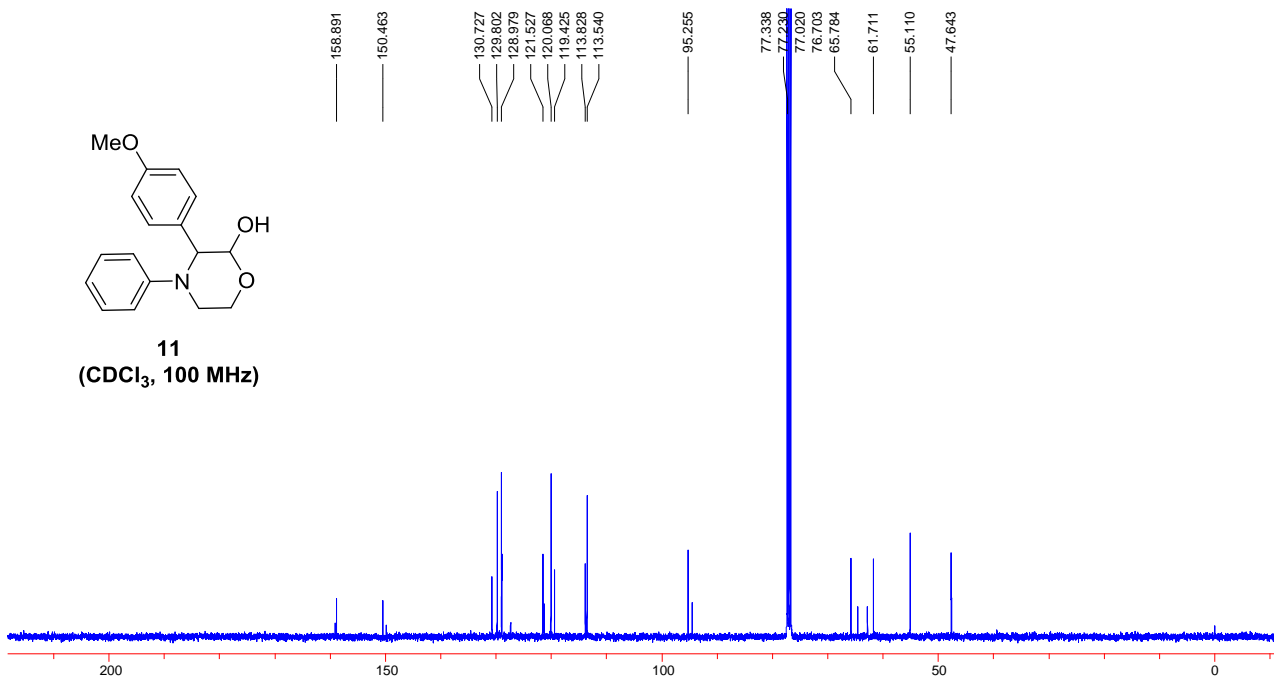



7.286 7.283 7.247 7.241 7.211 7.197 7.193 7.190 7.174 7.139 7.136 7.132 7.119 7.112 7.106 7.103 7.090 7.086 7.080 6.930 6.928 6.923 6.909 6.906 6.896 6.842 6.824 6.808 6.806 4.348 4.341 4.334 4.000 3.987 3.984 3.972 3.956 3.916 3.818 3.507 3.505 3.489 3.487 3.477 3.471 2.995 2.986 2.988 2.964 2.960 2.956 2.936 2.930 2.226 2.210 2.199 2.193 2.183 2.183 2.178 2.172 2.167 2.155 2.155 2.149 2.148 2.062 2.051 2.032 2.017 2.008 2.008 1.996 1.996 1.804 1.797 1.792 1.785 1.775 1.775 1.771 1.764 1.764 1.757 1.751 1.731 1.725 1.716 1.706 1.697 1.685 1.675 1.664

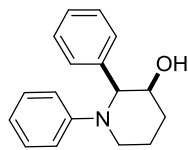

**12**  
(CDCl<sub>3</sub>, 400 MHz)

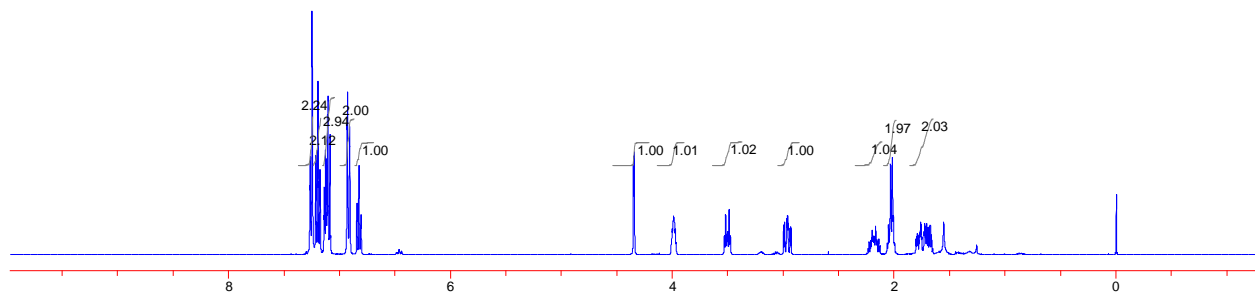

151.966 140.333 128.698 128.345 128.287 126.923 122.140 121.884 77.266 77.064 76.843 70.156 67.269 55.376 30.336 21.039

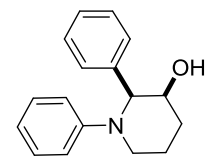

**12**  
(CDCl<sub>3</sub>, 150 MHz)

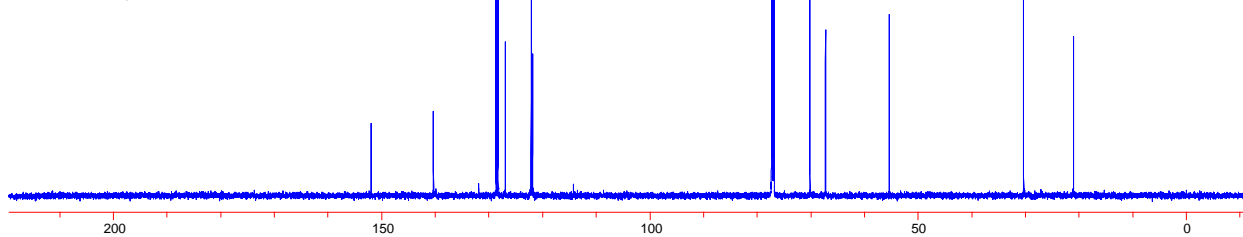

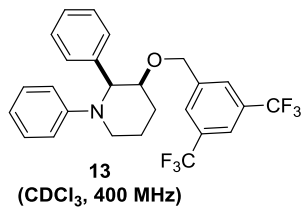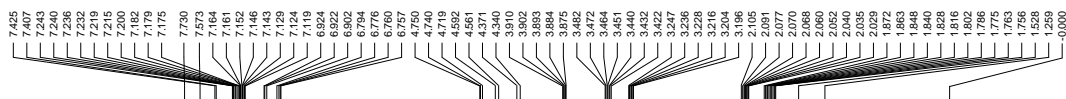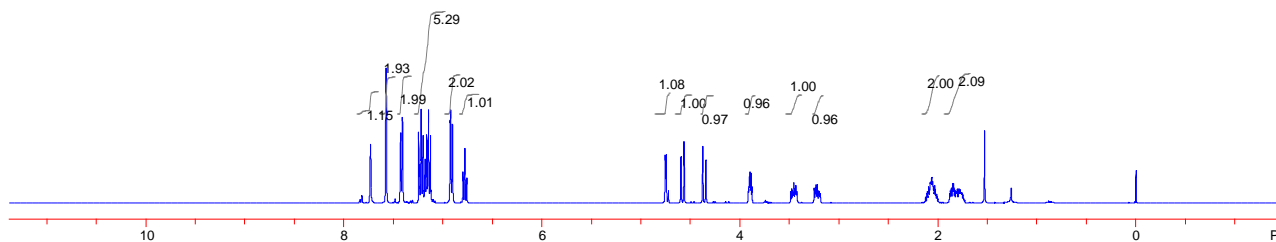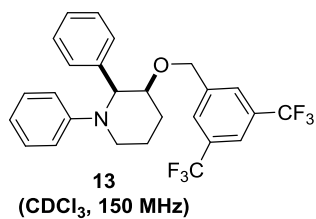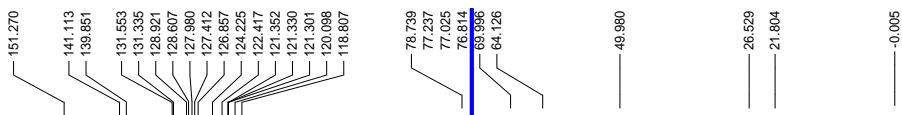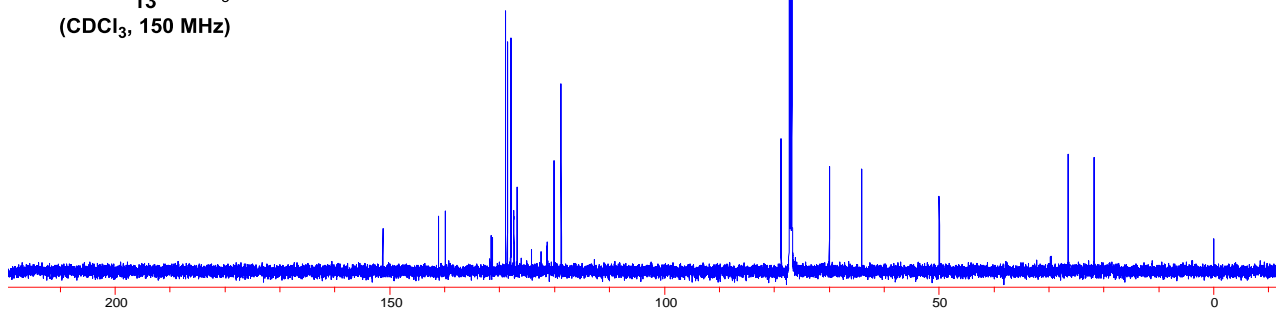

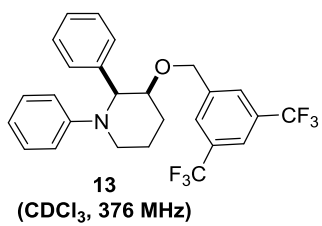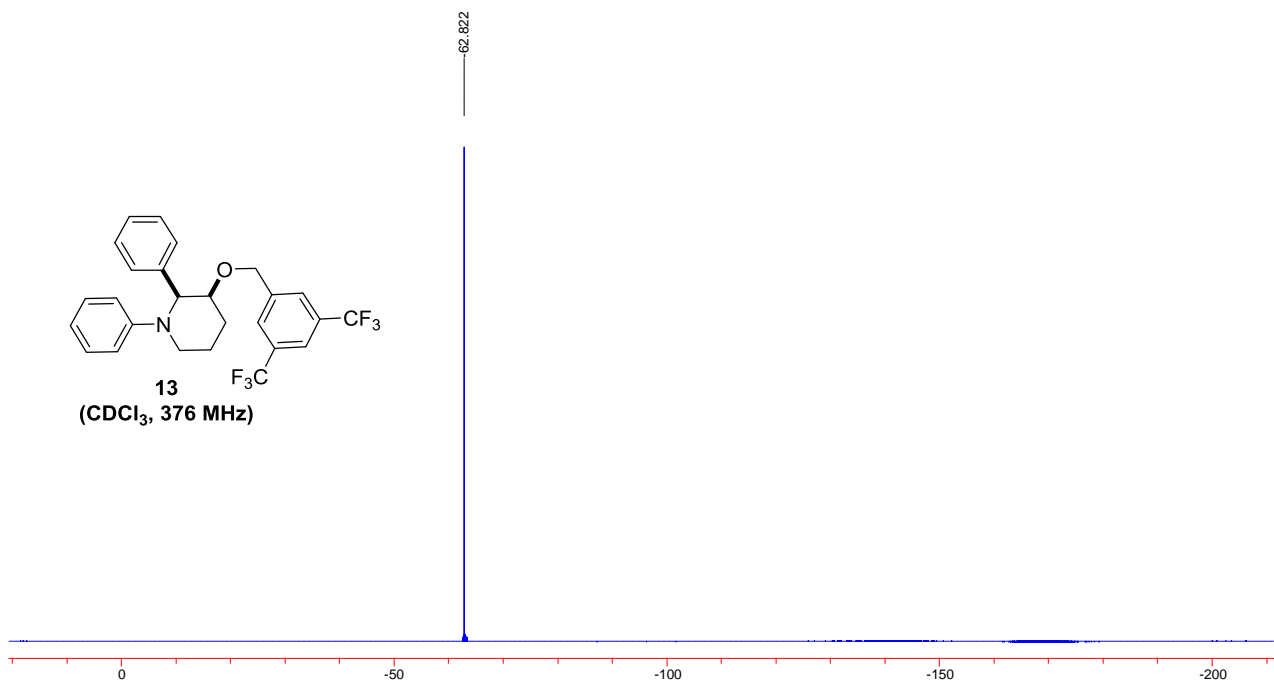

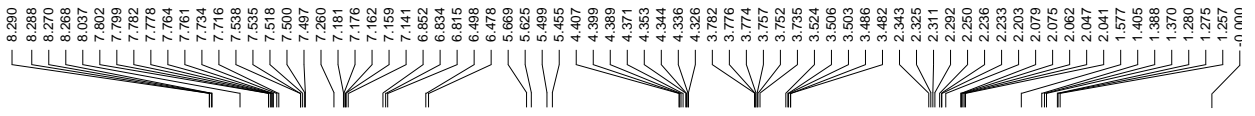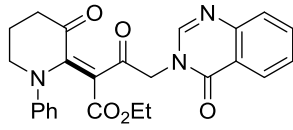

**15**  
(CDCl<sub>3</sub>, 400 MHz)

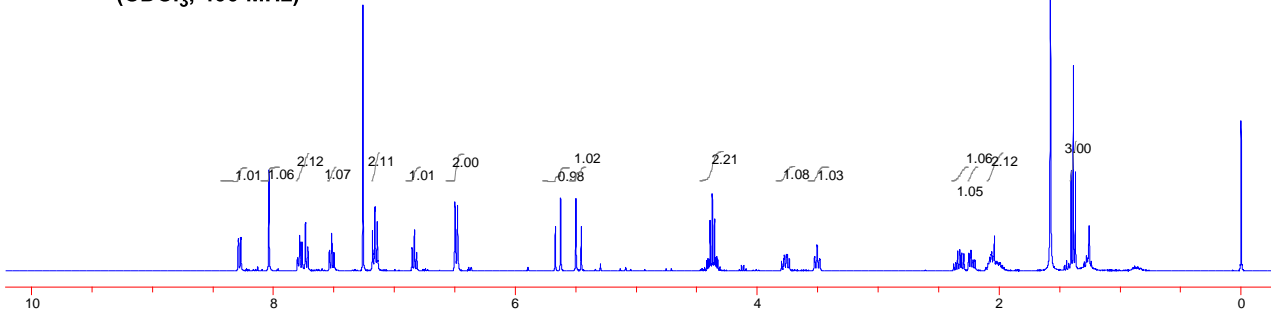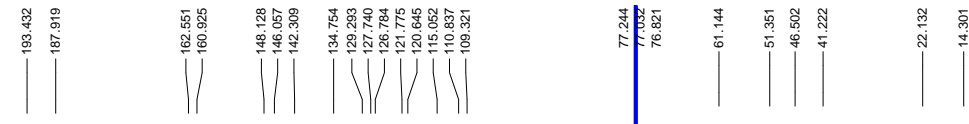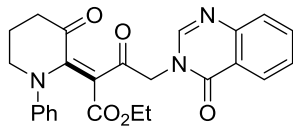

**15**  
(CDCl<sub>3</sub>, 150 MHz)

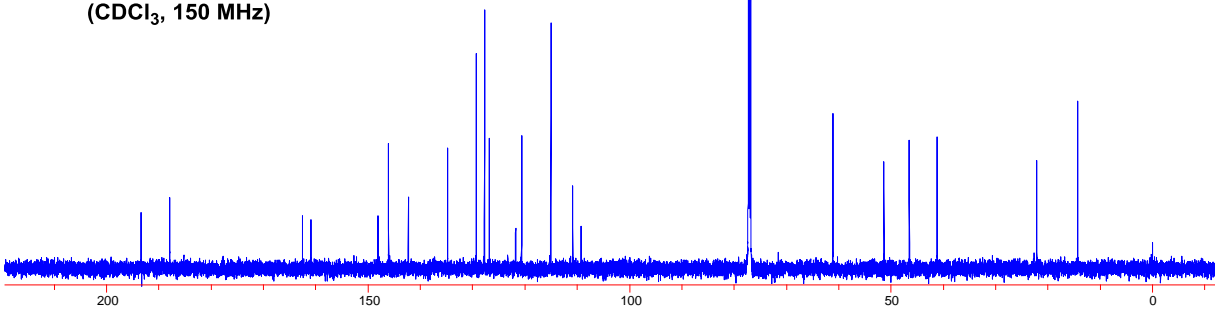

## VIII. X-ray Crystal Structures and Data of 7b and 9a

### 1. X-ray Crystal Structure and Data of 7b

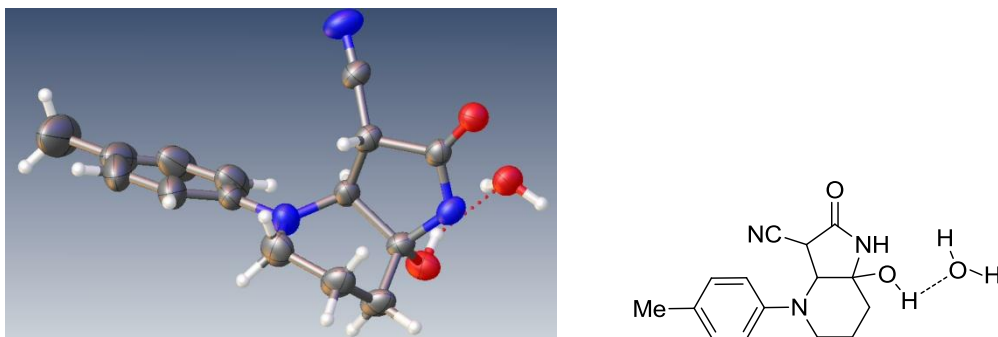

**Fig. S6** X-ray structure of **7b**

**X-ray structure determination.** Single crystals suitable for X-ray diffraction was obtained by slow evaporation of the solvent from a CH<sub>3</sub>CN solution of **7b**. Crystal data collection and refinement parameters of **7b** are summarized in Table S1. Intensity data were collected at 293 K on a SuperNova Dual diffractometer using mirror-monochromated Cu K $\alpha$  radiation,  $\lambda = 1.54184$  Å. The data were corrected for decay, Lorentz, and polarization effects as well as absorption and beam corrections based on the multi-scan technique. The structure was solved by a combination of direct methods in SHELXTL and the difference Fourier technique, and refined by full-matrix least-squares procedures. Nonhydrogen atoms were refined with anisotropic displacement parameters. The H-atoms were either located or calculated and subsequently treated with a riding model.

**Table S1** Crystallographic data and structure refinement results of **7b**

|                   |                                                               |
|-------------------|---------------------------------------------------------------|
| Empirical formula | C <sub>15</sub> H <sub>18</sub> N <sub>3</sub> O <sub>3</sub> |
| Formula weight    | 288.32                                                        |
| Temp, K           | 293(2)                                                        |
| Crystal system    | monoclinic                                                    |
| Space group       | P 2 <sub>1</sub> /c                                           |
| <i>a</i> , Å      | 19.019(4)                                                     |
| <i>b</i> , Å      | 10.378(2)                                                     |
| <i>c</i> , Å      | <i>c</i> =7.6447(13)                                          |
| $\alpha$ (°)      | 90                                                            |

|                                        |                |
|----------------------------------------|----------------|
| $\beta$ (°)                            | 100.068(17)    |
| $\gamma$ (°)                           | 90             |
| Volume, Å <sup>3</sup>                 | 1485.7(5)      |
| $Z$                                    | 4              |
| $d_{\text{calc}}$ , g cm <sup>-3</sup> | 1.289          |
| $\lambda$ , Å                          | 1.54184        |
| $\mu$ , mm <sup>-1</sup>               | 0.752          |
| No. of unique data                     | 2859/12/195    |
| $R_{\text{int}}$                       | 0.0601         |
| Goodness-of-fit on $F^2$               | 1.077          |
| $R_1$ , $wR_2$ ( $I > 2\sigma(I)$ )    | 0.1102, 0.3161 |
| $R_1$ , $wR_2$ (all data)              | 0.1292, 0.3429 |

## 2. X-ray Crystal Structure and Data of 9a

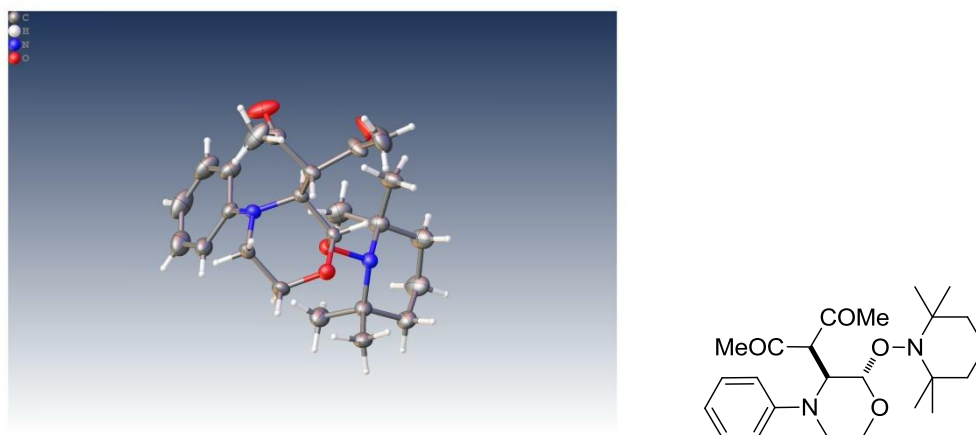

**Fig. S7** X-ray structure of **9a**

**X-ray structure determination.** Single crystals suitable for X-ray diffraction was obtained by slow evaporation of the solvent from a CH<sub>3</sub>CN solution of **9a**. Crystal data collection and refinement parameters of **9a** are summarized in Table S2. Intensity data were collected at 293 K on a SuperNova Dual diffractometer using mirror-monochromated Cu K $\alpha$  radiation,  $\lambda = 1.54184 \text{ \AA}$ . The data were corrected for decay, Lorentz, and polarization effects as well as absorption and beam corrections based on the multi-scan technique. The structure was solved by a combination of direct methods in SHELXTL and the difference Fourier technique, and refined by full-matrix least-squares procedures. Nonhydrogen atoms were refined with anisotropic displacement parameters. The H-atoms were either located or calculated and subsequently treated with a riding model.

**Table S2** Crystallographic data and structure refinement results of **9a**

|                   |                                                               |
|-------------------|---------------------------------------------------------------|
| Empirical formula | C <sub>24</sub> H <sub>36</sub> N <sub>2</sub> O <sub>4</sub> |
| Formula weight    | 416.55                                                        |
| Temp, K           | 293 (2)                                                       |
| Crystal system    | tetragonal                                                    |
| Space group       | I 4 <sub>1</sub> /a                                           |
| <i>a</i> , Å      | 33.7249(5)                                                    |
| <i>b</i> , Å      | 33.7249(5)                                                    |
| <i>c</i> , Å      | 8.3001(2)                                                     |
| $\alpha$ (°)      | 90                                                            |
| $\beta$ (°)       | 90                                                            |

|                                        |                |
|----------------------------------------|----------------|
| $\gamma$ (°)                           | 90             |
| Volume, Å <sup>3</sup>                 | 9440.3(4)      |
| Z                                      | 16             |
| $d_{\text{calc}}$ , g cm <sup>-3</sup> | 1.172          |
| $\lambda$ , Å                          | 1.54184        |
| $\mu$ , mm <sup>-1</sup>               | 0.634          |
| No. of unique data                     | 4404/0/277     |
| $R_{\text{int}}$                       | 0.0156         |
| Goodness-of-fit on $F^2$               | 1.053          |
| $R_1$ , $wR_2$ ( $I > 2\sigma(I)$ )    | 0.0508, 0.1304 |
| $R_1$ , $wR_2$ (all data)              | 0.0629, 0.1411 |



## IX. Details of DFT Calculations

All calculations have been performed using the DFT method implemented in the commercial Gaussian 16<sup>4</sup> program package. Molecular geometries of the model complexes were optimized applying the M062X(D3)<sup>5-6</sup> functional with the 6-31G(d)<sup>7</sup> basis set with the SMD<sup>8</sup> continuum solvation model in tetrahydrofuran. As soon as the convergences of optimizations were obtained, the frequency calculations at the same level have been performed to identify all the stationary points as minima. All transition states were further confirmed by vibrational analysis and characterized by the only one imaginary frequency. Furthermore intrinsic reaction coordinate (IRC)<sup>9</sup> calculations were performed to confirm that the optimized transition states correctly connect the relevant reactants and products. Additionally, the single-point energies for all stationary points have also been calculated at the M062x(D3)/6-311+G(d,p) level in tetrahydrofuran solvent to provide more accurate energy information. All energies discussed in the following parts are Gibbs free energies calculated at 298.15 K unless otherwise stated. All of the optimized geometries mentioned were built by Gaussview 6.0.<sup>10</sup>

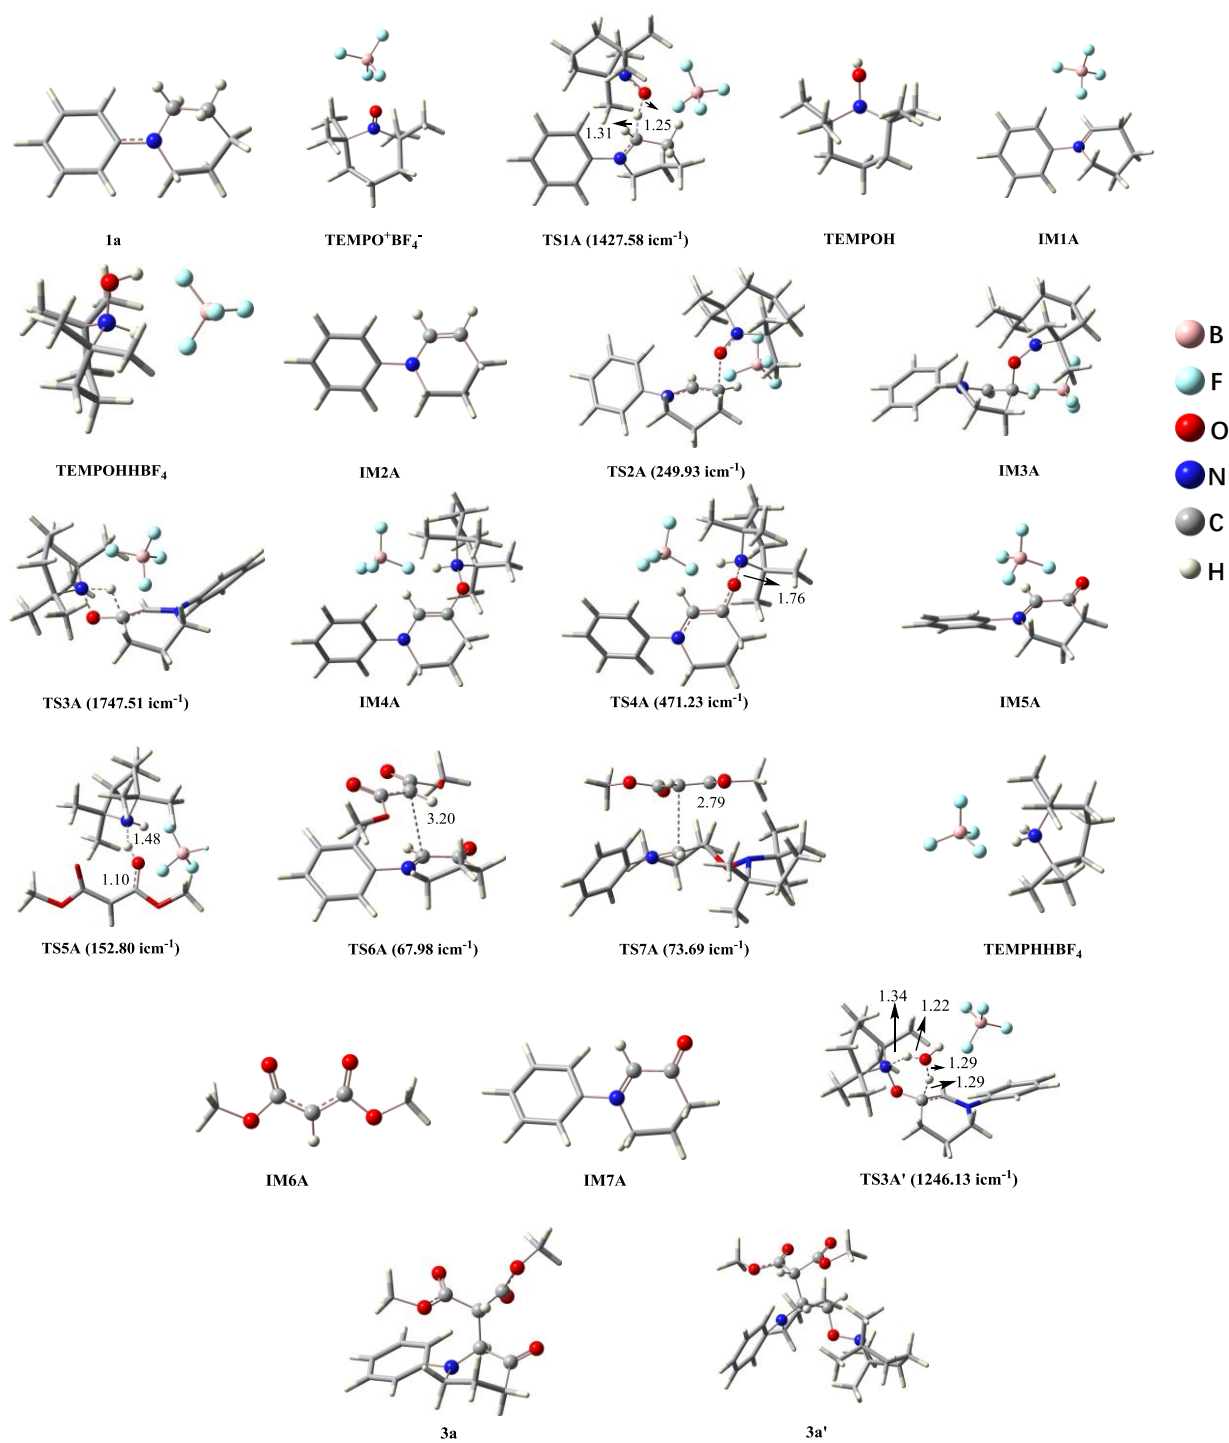

**Fig. S8** Optimized structures of key stationary states in Scheme 4

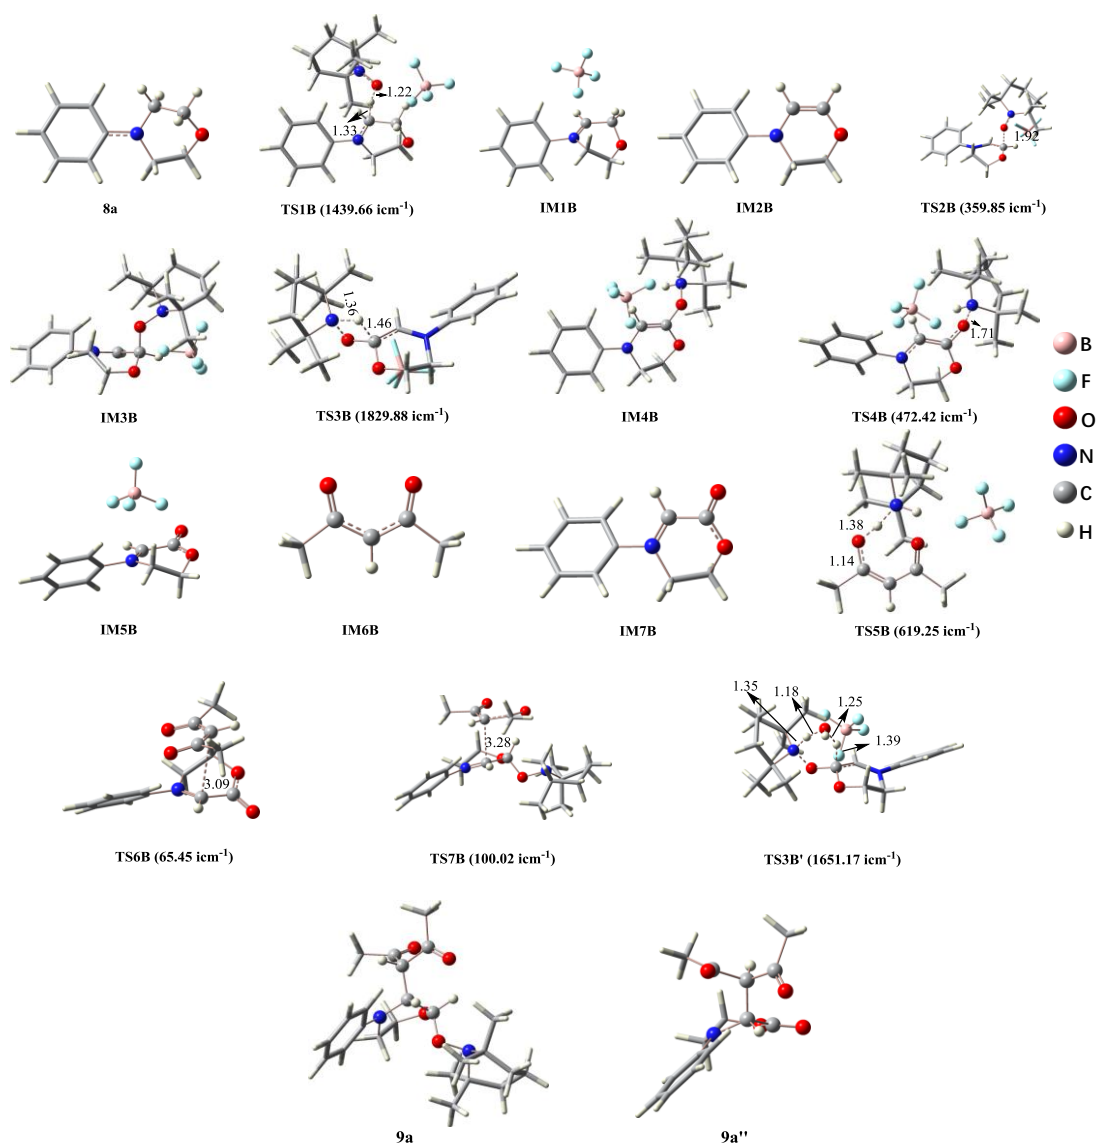

**Fig. S9** Optimized structures of key stationary states in Scheme 5

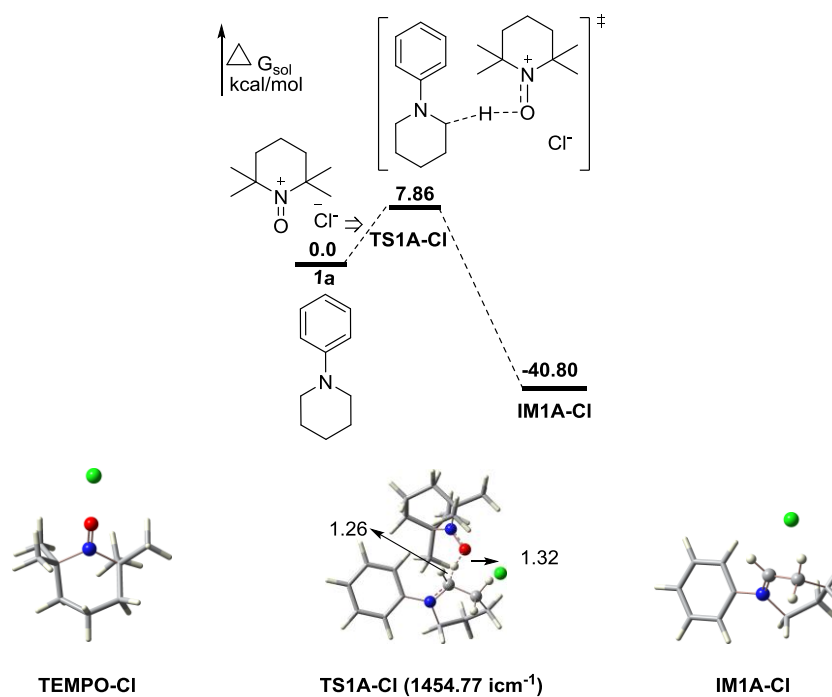

**Fig. S10** Computational investigation on the rate determining step for the formation of **3a** (with a chloride ion)

Considering that  $\text{CaCl}_2$  as additive can improve the yield of the reaction for the formation of **3a**, calculations of the rate determining step (hydride abstraction from  $\alpha$ -carbon of piperidine **1a** by  $\text{TEMPO}^+$  acts as the initial step for the formation of iminium intermediate **IM1A-Cl**) with a chloride ion was conducted. It requires a free energy barrier of 7.86 kcal/mol (**TS1A-Cl**), which is much lower than that with a  $\text{BF}_4^-$  (23.15 kcal/mol, **TS1A**). The result shows that chloride ion is favorable for rate determining step to further improve the formation of product **3a**.

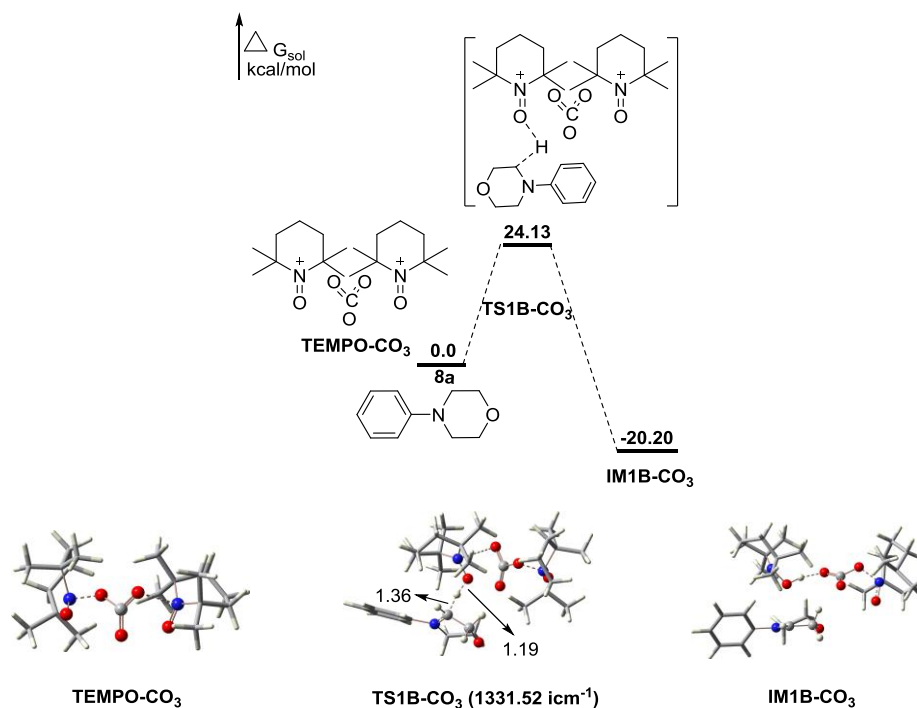

**Fig. S11** Computational investigation on the rate determining step for the formation of **9a** (with a carbonate ion)

Considering that  $\text{Na}_2\text{CO}_3$  as additive can improve the yield of the reaction for the formation of **9a**, calculations of the rate determining step (hydride abstraction from  $\alpha$ -carbon of morpholine **8a** by  $\text{TEMPO}^+$  acts as the initial step for the formation of iminium intermediate **IM1B-CO<sub>3</sub>**) with a carbonate ion was conducted. It requires a free energy barrier of 24.13 kcal/mol (**TS1B-CO<sub>3</sub>**), which is a little lower than that with a  $\text{BF}_4^-$  (24.30 kcal/mol, **TS1B**). In addition, we deduce  $\text{Na}_2\text{CO}_3$  might act as base to promote the deprotonation of nucleophile acetylacetone to improve the formation of product **9a**. The concrete role of  $\text{Na}_2\text{CO}_3$  will be further studied in our laboratory.

## Coordinates of Stationary Points

Cartesian coordinates (in Å),  $E_{\text{sol}}$  (in kcal/mol), Gibbs free energies ( $G_{\text{sol}}$ , in kcal/mol) and the number of imaginary vibrational frequencies ( $N_{\text{imag}}$ ) for the stationary points computed at the M062x(D3)/6-311+G(d,p) level in tetrahydrofuran solvent.

**Table S3**

|                                                     | $G_{\text{sol}}$ | Thermal<br>correction to<br>Gibbs Free<br>Energy (TCG) | $E_{\text{sol}}$ | $\Delta G_{\text{sol}}=E_{\text{sol}}+\text{TCG}$ | $N_{\text{imag}}$ |
|-----------------------------------------------------|------------------|--------------------------------------------------------|------------------|---------------------------------------------------|-------------------|
| <b>1a</b>                                           | -482.536329      | 0.205134                                               | -482.8702751     | -482.6651411                                      | 0                 |
| <b>TEMPOBF<sub>4</sub></b>                          | -907.564217      | 0.238674                                               | -908.0995694     | -907.8608954                                      | 0                 |
| <b>TS1A</b>                                         | -1390.062088     | 0.462093                                               | -1390.946769     | -1390.484676                                      | -1427.58          |
| <b>IM1A</b>                                         | -906.269569      | 0.201763                                               | -906.7555742     | -906.5538112                                      | 0                 |
| <b>TEMPOH</b>                                       | -483.861261      | 0.241587                                               | -484.2491599     | -484.0075729                                      | 0                 |
| <b>TEMPOH<sub>2</sub>BF<sub>4</sub></b>             | -908.794307      | 0.26409                                                | -909.3592486     | -909.0951586                                      | 0                 |
| <b>IM2A</b>                                         | -481.346596      | 0.182301                                               | -481.657465      | -481.475164                                       | 0                 |
| <b>TS2A</b>                                         | -1388.891123     | 0.444382                                               | -1389.753162     | -1389.30878                                       | -249.93           |
| <b>IM3A</b>                                         | -1388.928629     | 0.448976                                               | -1389.79415      | -1389.345174                                      | 0                 |
| <b>TS3A</b>                                         | -1388.889361     | 0.441478                                               | -1389.749217     | -1389.307739                                      | -1747.51          |
| <b>TS3A'</b>                                        | -1465.284723     | 0.468241                                               | -1466.227901     | -1465.75966                                       | -1246.13          |
| <b>IM4A</b>                                         | -1388.93773      | 0.450922                                               | -1389.805724     | -1389.354802                                      | 0                 |
| <b>TS4A</b>                                         | -1388.92543      | 0.447055                                               | -1389.789809     | -1389.342754                                      | -471.23           |
| <b>IM5A</b>                                         | -980.275116      | 0.182458                                               | -980.7649547     | -980.5824967                                      | 0                 |
| <b>TEMPH</b>                                        | -408.720732      | 0.239072                                               | -409.0789717     | -408.8398997                                      | 0                 |
| <b>CH<sub>2</sub>(CO<sub>2</sub>Me)<sub>2</sub></b> | -495.963773      | 0.098904                                               | -496.2220903     | -496.1231863                                      | 0                 |
| <b>TS5A</b>                                         | -1329.129965     | 0.366257                                               | -1329.933474     | -1329.567217                                      | -152.80           |
| <b>TEMPH<sub>2</sub>BF<sub>4</sub></b>              | -833.660814      | 0.261032                                               | -834.1973714     | -833.9363394                                      | 0                 |
| <b>IM6A</b>                                         | -495.475874      | 0.086212                                               | -495.734794      | -495.648582                                       | 0                 |
| <b>IM7A</b>                                         | -555.794917      | 0.175655                                               | -556.1171507     | -555.9414957                                      | 0                 |
| <b>TS6A</b>                                         | -1051.266833     | 0.285922                                               | -1051.866998     | -1051.581076                                      | -67.98            |
| <b>3a</b>                                           | -1051.330498     | 0.29047                                                | -1051.927167     | -1051.636697                                      | 0                 |
| <b>TS7A</b>                                         | -1459.930457     | 0.553396                                               | -1460.904556     | -1460.35116                                       | -73.69            |
| <b>3a'</b>                                          | -1459.975495     | 0.554597                                               | -1460.945216     | -1460.390619                                      | 0                 |

**1a**

Standard orientation:

---

| Center<br>Number | Atomic<br>Number | Atomic<br>Type | Coordinates (Angstroms) |           |           |
|------------------|------------------|----------------|-------------------------|-----------|-----------|
|                  |                  |                | X                       | Y         | Z         |
| 1                | 6                | 0              | -2.627068               | -1.034849 | 0.728272  |
| 2                | 6                | 0              | -1.290588               | -1.248985 | 0.021580  |
| 3                | 6                | 0              | -1.290582               | 1.248964  | -0.021599 |
| 4                | 6                | 0              | -2.627103               | 1.034865  | -0.728225 |
| 5                | 6                | 0              | -3.499836               | -0.000011 | 0.000022  |
| 6                | 1                | 0              | -0.711261               | -1.997745 | 0.570064  |
| 7                | 1                | 0              | -1.453507               | -1.642836 | -0.994604 |
| 8                | 1                | 0              | -4.152277               | -0.498259 | -0.724600 |
| 9                | 1                | 0              | -2.413312               | -0.693931 | 1.747918  |
| 10               | 1                | 0              | -1.453432               | 1.642786  | 0.994611  |
| 11               | 1                | 0              | -0.711285               | 1.997742  | -0.570094 |
| 12               | 1                | 0              | -2.413402               | 0.694002  | -1.747900 |
| 13               | 1                | 0              | -3.146437               | 1.994146  | -0.813607 |
| 14               | 1                | 0              | -4.152305               | 0.498210  | 0.724638  |
| 15               | 1                | 0              | -3.146399               | -1.994125 | 0.813738  |
| 16               | 7                | 0              | -0.534599               | -0.000009 | -0.000061 |
| 17               | 6                | 0              | 0.841660                | -0.000007 | -0.000036 |
| 18               | 6                | 0              | 1.575784                | -1.166974 | -0.311524 |
| 19               | 6                | 0              | 1.575756                | 1.166976  | 0.311478  |
| 20               | 6                | 0              | 2.966111                | -1.157784 | -0.304174 |
| 21               | 1                | 0              | 1.055791                | -2.077794 | -0.587120 |
| 22               | 6                | 0              | 2.966080                | 1.157801  | 0.304206  |
| 23               | 1                | 0              | 1.055728                | 2.077787  | 0.587034  |
| 24               | 6                | 0              | 3.680838                | 0.000010  | 0.000037  |

|    |   |   |          |           |           |
|----|---|---|----------|-----------|-----------|
| 25 | 1 | 0 | 3.495996 | -2.073318 | -0.554153 |
| 26 | 1 | 0 | 3.495947 | 2.073338  | 0.554209  |
| 27 | 1 | 0 | 4.766035 | 0.000020  | 0.000070  |

-----

**TEMPOBF<sub>4</sub>**

Standard orientation:

-----

| Center<br>Number | Atomic<br>Number | Atomic<br>Type | Coordinates (Angstroms) |           |           |
|------------------|------------------|----------------|-------------------------|-----------|-----------|
|                  |                  |                | X                       | Y         | Z         |
| 1                | 6                | 0              | 2.400011                | 1.062568  | 1.027451  |
| 2                | 6                | 0              | 1.253444                | 1.310492  | 0.034073  |
| 3                | 6                | 0              | 1.229739                | -1.342461 | -0.007296 |
| 4                | 6                | 0              | 2.756275                | -1.350661 | 0.300077  |
| 5                | 6                | 0              | 3.389385                | 0.038261  | 0.475678  |
| 6                | 1                | 0              | 3.764630                | 0.392999  | -0.491044 |
| 7                | 1                | 0              | 2.011398                | 0.749961  | 1.999854  |
| 8                | 1                | 0              | 3.263341                | -1.887787 | -0.505581 |
| 9                | 1                | 0              | 2.865338                | -1.941306 | 1.214216  |
| 10               | 1                | 0              | 4.253434                | -0.040657 | 1.139457  |
| 11               | 1                | 0              | 2.890889                | 2.028075  | 1.179903  |
| 12               | 7                | 0              | 0.935693                | -0.009724 | -0.654025 |
| 13               | 6                | 0              | 0.828030                | -2.431609 | -0.985501 |
| 14               | 1                | 0              | -0.249643               | -2.410462 | -1.166238 |
| 15               | 1                | 0              | 1.360938                | -2.337333 | -1.934952 |
| 16               | 1                | 0              | 1.095140                | -3.388540 | -0.530181 |
| 17               | 6                | 0              | 0.393890                | -1.453332 | 1.280683  |
| 18               | 1                | 0              | -0.662608               | -1.273065 | 1.083425  |
| 19               | 1                | 0              | 0.525949                | -2.483502 | 1.623368  |
| 20               | 1                | 0              | 0.741717                | -0.793347 | 2.075072  |



|    |   |   |           |           |           |
|----|---|---|-----------|-----------|-----------|
| 21 | 6 | 0 | 1.649218  | 2.296935  | -1.063930 |
| 22 | 1 | 0 | 0.828874  | 2.468533  | -1.762447 |
| 23 | 1 | 0 | 1.888673  | 3.242434  | -0.571990 |
| 24 | 1 | 0 | 2.529126  | 1.955827  | -1.616721 |
| 25 | 6 | 0 | -0.050631 | 1.767455  | 0.703943  |
| 26 | 1 | 0 | 0.181287  | 2.710005  | 1.208919  |
| 27 | 1 | 0 | -0.828275 | 1.940875  | -0.042108 |
| 28 | 1 | 0 | -0.419642 | 1.055446  | 1.443011  |
| 29 | 8 | 0 | 0.465010  | 0.020391  | -1.738275 |
| 30 | 9 | 0 | -3.141095 | 1.369258  | -0.184886 |
| 31 | 9 | 0 | -2.650393 | -0.155808 | 1.453319  |
| 32 | 9 | 0 | -4.044241 | -0.732255 | -0.268351 |
| 33 | 9 | 0 | -1.808242 | -0.430624 | -0.655034 |
| 34 | 5 | 0 | -2.922187 | 0.015152  | 0.088379  |

-----

### TS1A

Standard orientation:

-----

| Center | Atomic | Atomic | Coordinates (Angstroms) |          |           |
|--------|--------|--------|-------------------------|----------|-----------|
| Number | Number | Type   | X                       | Y        | Z         |
| 1      | 6      | 0      | 0.376907                | 3.744804 | 0.712385  |
| 2      | 6      | 0      | 0.949492                | 2.400483 | 1.185210  |
| 3      | 6      | 0      | 0.342416                | 1.705709 | -1.283683 |
| 4      | 6      | 0      | -0.779672               | 2.779146 | -1.314221 |
| 5      | 6      | 0      | -0.956139               | 3.554918 | -0.002843 |
| 6      | 1      | 0      | -1.646179               | 3.017648 | 0.658703  |
| 7      | 1      | 0      | 1.090753                | 4.244677 | 0.047577  |
| 8      | 1      | 0      | -1.726675               | 2.297205 | -1.579768 |
| 9      | 1      | 0      | -0.539099               | 3.474857 | -2.125272 |

|    |   |   |           |           |           |
|----|---|---|-----------|-----------|-----------|
| 10 | 1 | 0 | -1.417213 | 4.524743  | -0.211321 |
| 11 | 1 | 0 | 0.265179  | 4.383138  | 1.594668  |
| 12 | 7 | 0 | 0.709993  | 1.392224  | 0.122073  |
| 13 | 6 | 0 | -0.127440 | 0.421505  | -1.962823 |
| 14 | 1 | 0 | 0.675057  | -0.317132 | -2.012822 |
| 15 | 1 | 0 | -0.989579 | -0.006162 | -1.440587 |
| 16 | 1 | 0 | -0.443622 | 0.678207  | -2.978353 |
| 17 | 6 | 0 | 1.621283  | 2.196555  | -1.987417 |
| 18 | 1 | 0 | 2.414062  | 1.453862  | -1.863780 |
| 19 | 1 | 0 | 1.408475  | 2.328398  | -3.053364 |
| 20 | 1 | 0 | 1.965622  | 3.154830  | -1.589025 |
| 21 | 6 | 0 | 0.241758  | 1.926905  | 2.461659  |
| 22 | 1 | 0 | 0.618558  | 0.950645  | 2.780566  |
| 23 | 1 | 0 | 0.447858  | 2.646901  | 3.258628  |
| 24 | 1 | 0 | -0.842789 | 1.863517  | 2.328439  |
| 25 | 6 | 0 | 2.457335  | 2.490732  | 1.442310  |
| 26 | 1 | 0 | 2.638691  | 3.222299  | 2.236487  |
| 27 | 1 | 0 | 2.851285  | 1.519736  | 1.751646  |
| 28 | 1 | 0 | 2.988181  | 2.811681  | 0.541775  |
| 29 | 8 | 0 | 0.975271  | 0.185495  | 0.420992  |
| 30 | 9 | 0 | 2.907124  | -1.858771 | 0.559307  |
| 31 | 9 | 0 | 3.638190  | 0.149961  | -0.283747 |
| 32 | 9 | 0 | 4.714703  | -1.790669 | -0.837018 |
| 33 | 9 | 0 | 2.627340  | -1.376279 | -1.665734 |
| 34 | 5 | 0 | 3.469871  | -1.215626 | -0.551140 |
| 35 | 6 | 0 | 0.178580  | -2.332405 | 1.943698  |
| 36 | 6 | 0 | -0.820915 | -1.331062 | 1.375431  |
| 37 | 6 | 0 | -1.273801 | -2.850496 | -0.483021 |
| 38 | 6 | 0 | 0.181240  | -3.188543 | -0.221694 |
| 39 | 1 | 0 | -1.267620 | -0.673846 | 2.124404  |

|    |   |   |           |           |           |
|----|---|---|-----------|-----------|-----------|
| 40 | 1 | 0 | 0.008718  | -0.439861 | 0.833407  |
| 41 | 1 | 0 | -0.193090 | -2.651469 | 2.923902  |
| 42 | 1 | 0 | -1.895622 | -3.728936 | -0.280982 |
| 43 | 1 | 0 | -1.431544 | -2.534800 | -1.519549 |
| 44 | 1 | 0 | 0.851813  | -2.370515 | -0.514458 |
| 45 | 1 | 0 | 0.453364  | -4.085352 | -0.782009 |
| 46 | 1 | 0 | 1.144513  | -1.830691 | 2.082797  |
| 47 | 7 | 0 | -1.683713 | -1.753673 | 0.409904  |
| 48 | 6 | 0 | -2.870559 | -1.044025 | 0.113977  |
| 49 | 6 | 0 | -2.995479 | 0.310898  | 0.448483  |
| 50 | 6 | 0 | -3.921519 | -1.694717 | -0.542891 |
| 51 | 6 | 0 | -4.170125 | 0.993890  | 0.156548  |
| 52 | 1 | 0 | -2.160459 | 0.841564  | 0.897504  |
| 53 | 6 | 0 | -5.090580 | -0.997372 | -0.833029 |
| 54 | 1 | 0 | -3.838368 | -2.742251 | -0.810893 |
| 55 | 6 | 0 | -5.225424 | 0.344345  | -0.483135 |
| 56 | 1 | 0 | -4.248629 | 2.046133  | 0.413989  |
| 57 | 1 | 0 | -5.902417 | -1.514198 | -1.335245 |
| 58 | 1 | 0 | -6.138170 | 0.882578  | -0.717269 |
| 59 | 6 | 0 | 0.325894  | -3.487867 | 1.155430  |
| 60 | 1 | 0 | -0.417413 | -4.224096 | 1.379844  |
| 61 | 1 | 0 | 1.295173  | -3.877587 | 1.386766  |

-----

### IM1A

Standard orientation:

-----

| Center | Atomic | Atomic | Coordinates (Angstroms) |          |           |
|--------|--------|--------|-------------------------|----------|-----------|
| Number | Number | Type   | X                       | Y        | Z         |
| 1      | 6      | 0      | -1.335178               | 2.046256 | -0.554550 |

-----

|    |   |   |           |           |           |
|----|---|---|-----------|-----------|-----------|
| 2  | 6 | 0 | -0.360888 | 0.939368  | -0.694455 |
| 3  | 6 | 0 | 0.846437  | 2.016695  | 1.041778  |
| 4  | 6 | 0 | 0.685367  | 3.356421  | 0.328479  |
| 5  | 6 | 0 | -0.636340 | 3.421950  | -0.461878 |
| 6  | 1 | 0 | -0.481698 | 0.136948  | -1.416452 |
| 7  | 1 | 0 | -0.444541 | 3.786080  | -1.473437 |
| 8  | 1 | 0 | -1.875981 | 1.840347  | 0.379409  |
| 9  | 1 | 0 | 0.071042  | 1.866067  | 1.800811  |
| 10 | 1 | 0 | 1.822194  | 1.908764  | 1.510996  |
| 11 | 1 | 0 | 1.538880  | 3.483817  | -0.343860 |
| 12 | 1 | 0 | 0.737954  | 4.147322  | 1.080224  |
| 13 | 1 | 0 | -1.335434 | 4.117479  | 0.006899  |
| 14 | 1 | 0 | -2.059879 | 2.001174  | -1.365939 |
| 15 | 7 | 0 | 0.686288  | 0.922571  | 0.056979  |
| 16 | 6 | 0 | 1.653096  | -0.144397 | 0.000806  |
| 17 | 6 | 0 | 3.007699  | 0.176734  | -0.056869 |
| 18 | 6 | 0 | 1.208352  | -1.462906 | 0.000415  |
| 19 | 6 | 0 | 3.936979  | -0.855521 | -0.129442 |
| 20 | 1 | 0 | 3.328754  | 1.214103  | -0.065397 |
| 21 | 6 | 0 | 2.153366  | -2.483829 | -0.075593 |
| 22 | 1 | 0 | 0.147739  | -1.682441 | 0.072521  |
| 23 | 6 | 0 | 3.512072  | -2.184134 | -0.139193 |
| 24 | 1 | 0 | 4.994647  | -0.618964 | -0.183726 |
| 25 | 1 | 0 | 1.820899  | -3.516906 | -0.073740 |
| 26 | 1 | 0 | 4.242250  | -2.985433 | -0.193703 |
| 27 | 9 | 0 | -1.731034 | -0.565098 | 0.996278  |
| 28 | 9 | 0 | -2.856395 | -0.415827 | -0.986889 |
| 29 | 9 | 0 | -3.760406 | -1.597772 | 0.757150  |
| 30 | 9 | 0 | -1.922869 | -2.404958 | -0.345892 |
| 31 | 5 | 0 | -2.580055 | -1.252657 | 0.104749  |

-----  
**TEMPOH**

Standard orientation:

-----

| Center<br>Number | Atomic<br>Number | Atomic<br>Type | Coordinates (Angstroms) |           |           |
|------------------|------------------|----------------|-------------------------|-----------|-----------|
|                  |                  |                | X                       | Y         | Z         |
| 1                | 6                | 0              | -1.110475               | 1.408404  | 0.487161  |
| 2                | 6                | 0              | -1.271409               | -0.062506 | 0.054260  |
| 3                | 6                | 0              | 1.282922                | -0.030372 | 0.047960  |
| 4                | 6                | 0              | 1.310222                | 1.513617  | -0.133605 |
| 5                | 6                | 0              | -0.075527               | 2.124933  | -0.371653 |
| 6                | 1                | 0              | -0.350249               | 2.032363  | -1.428762 |
| 7                | 1                | 0              | -0.799294               | 1.457752  | 1.538715  |
| 8                | 1                | 0              | 1.970210                | 1.773192  | -0.968726 |
| 9                | 1                | 0              | 1.754369                | 1.954654  | 0.766835  |
| 10               | 1                | 0              | -0.054914               | 3.195084  | -0.140879 |
| 11               | 1                | 0              | -2.089974               | 1.896327  | 0.425259  |
| 12               | 7                | 0              | 0.013777                | -0.514630 | -0.546599 |
| 13               | 6                | 0              | 2.423651                | -0.644722 | -0.769146 |
| 14               | 1                | 0              | 2.512399                | -1.719667 | -0.589850 |
| 15               | 1                | 0              | 2.256785                | -0.477281 | -1.839153 |
| 16               | 1                | 0              | 3.370586                | -0.170268 | -0.490802 |
| 17               | 6                | 0              | 1.482075                | -0.425650 | 1.519291  |
| 18               | 1                | 0              | 1.305939                | -1.498037 | 1.652549  |
| 19               | 1                | 0              | 2.513612                | -0.208764 | 1.819755  |
| 20               | 1                | 0              | 0.821658                | 0.127421  | 2.192650  |
| 21               | 6                | 0              | -2.309222               | -0.165692 | -1.069206 |
| 22               | 1                | 0              | -2.328224               | -1.185056 | -1.468941 |
| 23               | 1                | 0              | -3.310314               | 0.076136  | -0.695963 |

|    |   |   |           |           |           |
|----|---|---|-----------|-----------|-----------|
| 24 | 1 | 0 | -2.067442 | 0.520261  | -1.888170 |
| 25 | 6 | 0 | -1.757036 | -0.908251 | 1.238838  |
| 26 | 1 | 0 | -2.678073 | -0.463591 | 1.633055  |
| 27 | 1 | 0 | -1.977064 | -1.932161 | 0.927565  |
| 28 | 1 | 0 | -1.027880 | -0.942118 | 2.051320  |
| 29 | 8 | 0 | 0.013058  | -1.939711 | -0.528756 |
| 30 | 1 | 0 | 0.125752  | -2.174719 | -1.463605 |

-----

### TEMPOH<sub>2</sub>BF<sub>4</sub>

Standard orientation:

-----

| Center<br>Number | Atomic<br>Number | Atomic<br>Type | Coordinates (Angstroms) |           |           |
|------------------|------------------|----------------|-------------------------|-----------|-----------|
|                  |                  |                | X                       | Y         | Z         |
| 1                | 6                | 0              | -2.191086               | 1.102556  | 1.147940  |
| 2                | 6                | 0              | -1.335850               | 1.315338  | -0.111755 |
| 3                | 6                | 0              | -1.315789               | -1.335182 | -0.084352 |
| 4                | 6                | 0              | -1.595710               | -1.328228 | 1.441221  |
| 5                | 6                | 0              | -1.571323               | 0.067383  | 2.081474  |
| 6                | 1                | 0              | -0.538706               | 0.352470  | 2.319497  |
| 7                | 1                | 0              | -3.201329               | 0.786364  | 0.864578  |
| 8                | 1                | 0              | -0.865731               | -1.970985 | 1.942317  |
| 9                | 1                | 0              | -2.581075               | -1.782437 | 1.586478  |
| 10               | 1                | 0              | -2.113504               | 0.039243  | 3.029964  |
| 11               | 1                | 0              | -2.285422               | 2.074471  | 1.642133  |
| 12               | 7                | 0              | -0.611971               | -0.014355 | -0.412006 |
| 13               | 6                | 0              | -0.329881               | -2.446303 | -0.437608 |
| 14               | 1                | 0              | -0.171134               | -2.522863 | -1.516372 |
| 15               | 1                | 0              | 0.631145                | -2.294266 | 0.062841  |
| 16               | 1                | 0              | -0.751331               | -3.391400 | -0.084423 |

|    |   |   |           |           |           |
|----|---|---|-----------|-----------|-----------|
| 17 | 6 | 0 | -2.581205 | -1.476722 | -0.920693 |
| 18 | 1 | 0 | -2.374146 | -1.305040 | -1.980694 |
| 19 | 1 | 0 | -2.936816 | -2.504833 | -0.805023 |
| 20 | 1 | 0 | -3.381735 | -0.811683 | -0.590915 |
| 21 | 6 | 0 | -0.212969 | 2.320635  | 0.136527  |
| 22 | 1 | 0 | 0.477803  | 2.347877  | -0.711277 |
| 23 | 1 | 0 | -0.653440 | 3.313769  | 0.256729  |
| 24 | 1 | 0 | 0.352891  | 2.078729  | 1.041679  |
| 25 | 6 | 0 | -2.176166 | 1.759993  | -1.301836 |
| 26 | 1 | 0 | -2.711889 | 2.661891  | -0.989450 |
| 27 | 1 | 0 | -1.552068 | 2.011308  | -2.161088 |
| 28 | 1 | 0 | -2.916918 | 1.016677  | -1.599452 |
| 29 | 8 | 0 | -0.180727 | 0.011730  | -1.744187 |
| 30 | 1 | 0 | 0.758138  | -0.285936 | -1.702809 |
| 31 | 1 | 0 | 0.235904  | -0.009355 | 0.185324  |
| 32 | 9 | 0 | 3.941860  | -0.566236 | 0.531406  |
| 33 | 9 | 0 | 1.781311  | -0.081871 | 1.129378  |
| 34 | 9 | 0 | 2.257763  | -0.682476 | -1.018212 |
| 35 | 9 | 0 | 2.944547  | 1.353684  | -0.223540 |
| 36 | 5 | 0 | 2.767906  | 0.023582  | 0.114140  |

-----

## IM2A

Standard orientation:

-----

| Center<br>Number | Atomic<br>Number | Atomic<br>Type | Coordinates (Angstroms) |           |           |
|------------------|------------------|----------------|-------------------------|-----------|-----------|
|                  |                  |                | X                       | Y         | Z         |
| 1                | 6                | 0              | 2.624607                | 1.277026  | -0.261151 |
| 2                | 6                | 0              | 1.305755                | 1.130992  | -0.457807 |
| 3                | 6                | 0              | 1.325843                | -1.101075 | 0.500765  |

|    |   |   |           |           |           |
|----|---|---|-----------|-----------|-----------|
| 4  | 6 | 0 | 2.768536  | -1.180969 | 0.013921  |
| 5  | 6 | 0 | 3.488875  | 0.149999  | 0.239317  |
| 6  | 1 | 0 | 0.713640  | 1.931827  | -0.889495 |
| 7  | 1 | 0 | 4.449803  | 0.150995  | -0.287862 |
| 8  | 1 | 0 | 1.310145  | -0.892925 | 1.581761  |
| 9  | 1 | 0 | 0.819847  | -2.053634 | 0.337558  |
| 10 | 1 | 0 | 2.766855  | -1.421595 | -1.055576 |
| 11 | 1 | 0 | 3.273965  | -1.997409 | 0.538053  |
| 12 | 1 | 0 | 3.724601  | 0.273415  | 1.305483  |
| 13 | 1 | 0 | 3.081388  | 2.222768  | -0.534871 |
| 14 | 7 | 0 | 0.596336  | -0.041861 | -0.205565 |
| 15 | 6 | 0 | -0.807978 | -0.006513 | -0.091359 |
| 16 | 6 | 0 | -1.558146 | -1.169237 | -0.332249 |
| 17 | 6 | 0 | -1.490706 | 1.170184  | 0.252038  |
| 18 | 6 | 0 | -2.944618 | -1.148955 | -0.235759 |
| 19 | 1 | 0 | -1.053953 | -2.086637 | -0.619315 |
| 20 | 6 | 0 | -2.881715 | 1.184388  | 0.327487  |
| 21 | 1 | 0 | -0.933556 | 2.072291  | 0.482550  |
| 22 | 6 | 0 | -3.619598 | 0.028261  | 0.088424  |
| 23 | 1 | 0 | -3.502332 | -2.060361 | -0.431403 |
| 24 | 1 | 0 | -3.387060 | 2.108239  | 0.594504  |
| 25 | 1 | 0 | -4.702820 | 0.041444  | 0.155801  |

-----

## TS2A

Standard orientation:

-----

| Center | Atomic | Atomic | Coordinates (Angstroms) |           |           |
|--------|--------|--------|-------------------------|-----------|-----------|
| Number | Number | Type   | X                       | Y         | Z         |
| 1      | 6      | 0      | -0.316929               | -0.644533 | -1.434334 |

-----



|    |   |   |           |           |           |
|----|---|---|-----------|-----------|-----------|
| 2  | 6 | 0 | -1.428526 | -0.075211 | -0.801728 |
| 3  | 6 | 0 | -2.779257 | -2.047067 | -1.228634 |
| 4  | 6 | 0 | -1.984479 | -2.161753 | -2.520215 |
| 5  | 6 | 0 | -0.503947 | -1.905439 | -2.239003 |
| 6  | 1 | 0 | -1.377584 | 0.938026  | -0.416964 |
| 7  | 1 | 0 | 0.065606  | -1.843828 | -3.170937 |
| 8  | 1 | 0 | -2.443450 | -2.789077 | -0.494484 |
| 9  | 1 | 0 | -3.845305 | -2.196482 | -1.397358 |
| 10 | 1 | 0 | -2.371191 | -1.433995 | -3.242355 |
| 11 | 1 | 0 | -2.132503 | -3.161632 | -2.936260 |
| 12 | 1 | 0 | -0.100032 | -2.753968 | -1.667967 |
| 13 | 1 | 0 | 0.472463  | 0.055113  | -1.677032 |
| 14 | 7 | 0 | -2.590481 | -0.707429 | -0.639345 |
| 15 | 6 | 0 | -3.642627 | -0.123347 | 0.127521  |
| 16 | 6 | 0 | -4.945638 | -0.101661 | -0.377695 |
| 17 | 6 | 0 | -3.362733 | 0.434202  | 1.376625  |
| 18 | 6 | 0 | -5.961434 | 0.483111  | 0.370885  |
| 19 | 1 | 0 | -5.159343 | -0.513111 | -1.359210 |
| 20 | 6 | 0 | -4.386098 | 1.025070  | 2.112964  |
| 21 | 1 | 0 | -2.354780 | 0.385616  | 1.777042  |
| 22 | 6 | 0 | -5.686844 | 1.049042  | 1.615684  |
| 23 | 1 | 0 | -6.970784 | 0.505301  | -0.027897 |
| 24 | 1 | 0 | -4.163570 | 1.454932  | 3.084591  |
| 25 | 1 | 0 | -6.483871 | 1.504683  | 2.194609  |
| 26 | 6 | 0 | 2.994793  | 0.073845  | 2.402755  |
| 27 | 6 | 0 | 1.594804  | -0.338627 | 1.932886  |
| 28 | 6 | 0 | 2.997166  | -1.402420 | -0.033694 |
| 29 | 6 | 0 | 4.090193  | -0.323743 | 0.169979  |
| 30 | 6 | 0 | 3.795407  | 0.701144  | 1.269422  |
| 31 | 1 | 0 | 3.233726  | 1.536907  | 0.842865  |

|    |   |   |           |           |           |
|----|---|---|-----------|-----------|-----------|
| 32 | 1 | 0 | 3.527474  | -0.791938 | 2.813371  |
| 33 | 1 | 0 | 4.244343  | 0.202358  | -0.775324 |
| 34 | 1 | 0 | 5.019217  | -0.857504 | 0.398874  |
| 35 | 1 | 0 | 4.736826  | 1.106739  | 1.652499  |
| 36 | 1 | 0 | 2.858509  | 0.781037  | 3.227928  |
| 37 | 7 | 0 | 1.697387  | -0.990951 | 0.588960  |
| 38 | 6 | 0 | 2.795193  | -1.658336 | -1.524638 |
| 39 | 1 | 0 | 2.103703  | -2.483301 | -1.706431 |
| 40 | 1 | 0 | 2.445416  | -0.757552 | -2.032170 |
| 41 | 1 | 0 | 3.769356  | -1.930386 | -1.942770 |
| 42 | 6 | 0 | 3.384107  | -2.731665 | 0.643289  |
| 43 | 1 | 0 | 2.569731  | -3.456318 | 0.539935  |
| 44 | 1 | 0 | 4.274733  | -3.132361 | 0.148525  |
| 45 | 1 | 0 | 3.613065  | -2.605504 | 1.704573  |
| 46 | 6 | 0 | 0.689586  | 0.886250  | 1.809619  |
| 47 | 1 | 0 | -0.257202 | 0.610272  | 1.344173  |
| 48 | 1 | 0 | 0.474460  | 1.259146  | 2.815915  |
| 49 | 1 | 0 | 1.148403  | 1.688584  | 1.229112  |
| 50 | 6 | 0 | 0.966380  | -1.350297 | 2.896655  |
| 51 | 1 | 0 | 0.929261  | -0.909468 | 3.897646  |
| 52 | 1 | 0 | -0.052285 | -1.600561 | 2.586663  |
| 53 | 1 | 0 | 1.560280  | -2.268408 | 2.942590  |
| 54 | 8 | 0 | 0.644888  | -1.482491 | 0.121751  |
| 55 | 5 | 0 | 1.510033  | 2.653421  | -1.234404 |
| 56 | 9 | 0 | 0.123485  | 2.471056  | -1.115723 |
| 57 | 9 | 0 | 2.132390  | 1.390762  | -1.294746 |
| 58 | 9 | 0 | 1.986303  | 3.342496  | -0.110576 |
| 59 | 9 | 0 | 1.797044  | 3.374217  | -2.391522 |

-----  
**IM3A**

Standard orientation:

---

| Center<br>Number | Atomic<br>Number | Atomic<br>Type | Coordinates (Angstroms) |           |           |
|------------------|------------------|----------------|-------------------------|-----------|-----------|
|                  |                  |                | X                       | Y         | Z         |
| 1                | 6                | 0              | -0.061651               | -0.232958 | -1.367108 |
| 2                | 6                | 0              | -1.311442               | 0.291011  | -0.700124 |
| 3                | 6                | 0              | -2.191659               | -1.902900 | -1.048982 |
| 4                | 6                | 0              | -1.625154               | -1.915694 | -2.473328 |
| 5                | 6                | 0              | -0.517944               | -0.863798 | -2.686677 |
| 6                | 1                | 0              | -1.418329               | 1.330256  | -0.399941 |
| 7                | 1                | 0              | -0.882419               | -0.053723 | -3.324956 |
| 8                | 1                | 0              | -1.525715               | -2.416036 | -0.353307 |
| 9                | 1                | 0              | -3.178270               | -2.357590 | -0.995582 |
| 10               | 1                | 0              | -2.441158               | -1.744188 | -3.179483 |
| 11               | 1                | 0              | -1.243926               | -2.923702 | -2.650464 |
| 12               | 1                | 0              | 0.355485                | -1.297970 | -3.177366 |
| 13               | 1                | 0              | 0.635077                | 0.589778  | -1.521465 |
| 14               | 7                | 0              | -2.311582               | -0.505056 | -0.553344 |
| 15               | 6                | 0              | -3.535188               | -0.079206 | 0.081489  |
| 16               | 6                | 0              | -4.748652               | -0.339814 | -0.551166 |
| 17               | 6                | 0              | -3.470705               | 0.586702  | 1.301186  |
| 18               | 6                | 0              | -5.923148               | 0.093101  | 0.054497  |
| 19               | 1                | 0              | -4.772441               | -0.850880 | -1.508733 |
| 20               | 6                | 0              | -4.656286               | 1.010616  | 1.896311  |
| 21               | 1                | 0              | -2.512703               | 0.752022  | 1.784562  |
| 22               | 6                | 0              | -5.878878               | 0.765581  | 1.275870  |
| 23               | 1                | 0              | -6.874356               | -0.093321 | -0.433122 |
| 24               | 1                | 0              | -4.619204               | 1.525052  | 2.850861  |
| 25               | 1                | 0              | -6.800056               | 1.095745  | 1.745217  |

|    |   |   |           |           |           |
|----|---|---|-----------|-----------|-----------|
| 26 | 6 | 0 | 2.577374  | -0.993233 | 2.490474  |
| 27 | 6 | 0 | 1.276234  | -0.870018 | 1.671461  |
| 28 | 6 | 0 | 2.856532  | -1.418344 | -0.264074 |
| 29 | 6 | 0 | 4.056421  | -0.771215 | 0.474924  |
| 30 | 6 | 0 | 3.706578  | -0.195671 | 1.853233  |
| 31 | 1 | 0 | 3.394288  | 0.847279  | 1.741008  |
| 32 | 1 | 0 | 2.871765  | -2.044530 | 2.585989  |
| 33 | 1 | 0 | 4.469795  | 0.027927  | -0.150515 |
| 34 | 1 | 0 | 4.835761  | -1.536841 | 0.567669  |
| 35 | 1 | 0 | 4.591353  | -0.198697 | 2.497936  |
| 36 | 1 | 0 | 2.365754  | -0.635586 | 3.504535  |
| 37 | 7 | 0 | 1.626630  | -0.732506 | 0.218993  |
| 38 | 6 | 0 | 3.006302  | -1.121387 | -1.758962 |
| 39 | 1 | 0 | 2.290632  | -1.692074 | -2.356815 |
| 40 | 1 | 0 | 2.870646  | -0.052627 | -1.951806 |
| 41 | 1 | 0 | 4.013870  | -1.406873 | -2.080339 |
| 42 | 6 | 0 | 2.826433  | -2.945853 | -0.091908 |
| 43 | 1 | 0 | 1.911954  | -3.356999 | -0.531864 |
| 44 | 1 | 0 | 3.681561  | -3.383804 | -0.618853 |
| 45 | 1 | 0 | 2.885668  | -3.262898 | 0.951776  |
| 46 | 6 | 0 | 0.568532  | 0.425897  | 2.078241  |
| 47 | 1 | 0 | -0.311831 | 0.603161  | 1.454213  |
| 48 | 1 | 0 | 0.230662  | 0.360472  | 3.118709  |
| 49 | 1 | 0 | 1.226489  | 1.290908  | 1.963389  |
| 50 | 6 | 0 | 0.351623  | -2.052739 | 1.980759  |
| 51 | 1 | 0 | 0.294738  | -2.178202 | 3.067815  |
| 52 | 1 | 0 | -0.663460 | -1.870091 | 1.613556  |
| 53 | 1 | 0 | 0.715231  | -2.988321 | 1.548131  |
| 54 | 8 | 0 | 0.537167  | -1.238261 | -0.556090 |
| 55 | 5 | 0 | 1.718492  | 2.971702  | -0.590121 |

|    |   |   |          |          |           |
|----|---|---|----------|----------|-----------|
| 56 | 9 | 0 | 0.402970 | 2.603021 | -0.250872 |
| 57 | 9 | 0 | 2.131863 | 2.219374 | -1.702756 |
| 58 | 9 | 0 | 2.569481 | 2.716248 | 0.492717  |
| 59 | 9 | 0 | 1.748585 | 4.329403 | -0.907718 |

-----

### TS3A

Standard orientation:

-----

| Center<br>Number | Atomic<br>Number | Atomic<br>Type | Coordinates (Angstroms) |           |           |
|------------------|------------------|----------------|-------------------------|-----------|-----------|
|                  |                  |                | X                       | Y         | Z         |
| 1                | 6                | 0              | -0.734474               | 0.088480  | 0.977987  |
| 2                | 6                | 0              | 0.472955                | -0.490991 | 0.333443  |
| 3                | 6                | 0              | 1.448406                | -0.535866 | 2.507978  |
| 4                | 6                | 0              | 0.897047                | 0.886407  | 2.739943  |
| 5                | 6                | 0              | -0.160250               | 1.320883  | 1.691306  |
| 6                | 1                | 0              | 0.599797                | -0.546859 | -0.747598 |
| 7                | 1                | 0              | 0.305494                | 1.961988  | 0.934373  |
| 8                | 1                | 0              | 0.816949                | -1.282709 | 2.988568  |
| 9                | 1                | 0              | 2.462562                | -0.645125 | 2.889952  |
| 10               | 1                | 0              | 1.728094                | 1.596680  | 2.753079  |
| 11               | 1                | 0              | 0.452049                | 0.871686  | 3.737495  |
| 12               | 1                | 0              | -0.950540               | 1.907946  | 2.163794  |
| 13               | 1                | 0              | -1.501563               | 0.483495  | -0.037572 |
| 14               | 7                | 0              | 1.486658                | -0.847850 | 1.057007  |
| 15               | 6                | 0              | 2.646577                | -1.468438 | 0.476015  |
| 16               | 6                | 0              | 3.915288                | -0.968487 | 0.765227  |
| 17               | 6                | 0              | 2.467779                | -2.546708 | -0.386050 |
| 18               | 6                | 0              | 5.021270                | -1.561467 | 0.165776  |
| 19               | 1                | 0              | 4.034984                | -0.116605 | 1.427372  |

|    |   |   |           |           |           |
|----|---|---|-----------|-----------|-----------|
| 20 | 6 | 0 | 3.584805  | -3.130350 | -0.978839 |
| 21 | 1 | 0 | 1.469025  | -2.932034 | -0.571143 |
| 22 | 6 | 0 | 4.859121  | -2.640313 | -0.703842 |
| 23 | 1 | 0 | 6.012833  | -1.174040 | 0.376253  |
| 24 | 1 | 0 | 3.454666  | -3.975227 | -1.647266 |
| 25 | 1 | 0 | 5.728028  | -3.100059 | -1.163906 |
| 26 | 6 | 0 | -4.244518 | -1.050159 | -1.745665 |
| 27 | 6 | 0 | -3.073233 | -1.370647 | -0.797947 |
| 28 | 6 | 0 | -3.895625 | 0.812573  | 0.353233  |
| 29 | 6 | 0 | -4.477253 | 1.329558  | -0.986954 |
| 30 | 6 | 0 | -4.213222 | 0.408408  | -2.183660 |
| 31 | 1 | 0 | -3.234290 | 0.635725  | -2.622868 |
| 32 | 1 | 0 | -5.200082 | -1.271015 | -1.257592 |
| 33 | 1 | 0 | -4.070440 | 2.324293  | -1.195453 |
| 34 | 1 | 0 | -5.556349 | 1.449681  | -0.841091 |
| 35 | 1 | 0 | -4.957973 | 0.592318  | -2.963191 |
| 36 | 1 | 0 | -4.165712 | -1.723774 | -2.604934 |
| 37 | 7 | 0 | -2.758877 | -0.123586 | 0.017269  |
| 38 | 6 | 0 | -3.324690 | 1.988778  | 1.143987  |
| 39 | 1 | 0 | -3.027676 | 1.682864  | 2.149980  |
| 40 | 1 | 0 | -2.468581 | 2.439713  | 0.631700  |
| 41 | 1 | 0 | -4.108862 | 2.747186  | 1.231575  |
| 42 | 6 | 0 | -4.938746 | 0.117148  | 1.228765  |
| 43 | 1 | 0 | -4.462494 | -0.356675 | 2.090526  |
| 44 | 1 | 0 | -5.634125 | 0.880988  | 1.593420  |
| 45 | 1 | 0 | -5.525440 | -0.629220 | 0.689589  |
| 46 | 6 | 0 | -1.825123 | -1.702903 | -1.620434 |
| 47 | 1 | 0 | -0.983033 | -1.975815 | -0.978729 |
| 48 | 1 | 0 | -2.045133 | -2.569789 | -2.250540 |
| 49 | 1 | 0 | -1.522823 | -0.871517 | -2.265535 |

|    |   |   |           |           |           |
|----|---|---|-----------|-----------|-----------|
| 50 | 6 | 0 | -3.396092 | -2.557957 | 0.107424  |
| 51 | 1 | 0 | -3.704403 | -3.389506 | -0.535779 |
| 52 | 1 | 0 | -2.516561 | -2.871282 | 0.675487  |
| 53 | 1 | 0 | -4.202633 | -2.352120 | 0.812985  |
| 54 | 8 | 0 | -1.969529 | -0.497714 | 1.285194  |
| 55 | 5 | 0 | 2.956134  | 2.472607  | -1.016887 |
| 56 | 9 | 0 | 4.048165  | 1.595799  | -1.104351 |
| 57 | 9 | 0 | 3.312544  | 3.714336  | -1.568751 |
| 58 | 9 | 0 | 2.599314  | 2.643735  | 0.323652  |
| 59 | 9 | 0 | 1.870554  | 1.941668  | -1.729011 |

-----

**TS3A'**

Standard orientation:

-----

| Center | Atomic | Atomic | Coordinates (Angstroms) |           |           |
|--------|--------|--------|-------------------------|-----------|-----------|
| Number | Number | Type   | X                       | Y         | Z         |
| 1      | 6      | 0      | -0.427322               | -1.342016 | -0.196124 |
| 2      | 6      | 0      | 0.908110                | -0.862903 | -0.189515 |
| 3      | 6      | 0      | 1.737271                | -3.101357 | -0.528721 |
| 4      | 6      | 0      | 0.346492                | -3.517127 | -0.074670 |
| 5      | 1      | 0      | 1.095763                | 0.194125  | -0.015109 |
| 6      | 1      | 0      | 1.853168                | -3.234006 | -1.607851 |
| 7      | 1      | 0      | 2.495029                | -3.693714 | -0.016521 |
| 8      | 1      | 0      | 0.288202                | -3.498527 | 1.022244  |
| 9      | 1      | 0      | 0.124659                | -4.525112 | -0.426537 |
| 10     | 1      | 0      | -0.755790               | -1.378633 | 1.155096  |
| 11     | 7      | 0      | 1.946178                | -1.673765 | -0.216593 |
| 12     | 6      | 0      | 3.279895                | -1.175740 | -0.026412 |
| 13     | 6      | 0      | 4.166893                | -1.863754 | 0.801294  |

|    |   |   |           |           |           |
|----|---|---|-----------|-----------|-----------|
| 14 | 6 | 0 | 3.664482  | 0.001993  | -0.664431 |
| 15 | 6 | 0 | 5.450629  | -1.359855 | 0.988925  |
| 16 | 1 | 0 | 3.856414  | -2.768133 | 1.314661  |
| 17 | 6 | 0 | 4.945647  | 0.504453  | -0.454773 |
| 18 | 1 | 0 | 2.964923  | 0.524289  | -1.309037 |
| 19 | 6 | 0 | 5.843007  | -0.176745 | 0.364369  |
| 20 | 1 | 0 | 6.141013  | -1.890838 | 1.636641  |
| 21 | 1 | 0 | 5.237544  | 1.429566  | -0.941406 |
| 22 | 1 | 0 | 6.844362  | 0.212864  | 0.518380  |
| 23 | 6 | 0 | -3.841669 | 1.823066  | 0.736645  |
| 24 | 6 | 0 | -2.434545 | 1.363194  | 0.305180  |
| 25 | 6 | 0 | -3.752616 | -0.701935 | -0.548546 |
| 26 | 6 | 0 | -4.880170 | -0.448005 | 0.489104  |
| 27 | 6 | 0 | -4.596339 | 0.710730  | 1.453521  |
| 28 | 1 | 0 | -4.003503 | 0.354605  | 2.306020  |
| 29 | 1 | 0 | -4.415797 | 2.154226  | -0.135897 |
| 30 | 1 | 0 | -5.052415 | -1.364939 | 1.062698  |
| 31 | 1 | 0 | -5.797541 | -0.246931 | -0.074757 |
| 32 | 1 | 0 | -5.537156 | 1.087321  | 1.864760  |
| 33 | 1 | 0 | -3.717115 | 2.697778  | 1.383237  |
| 34 | 7 | 0 | -2.490965 | -0.140614 | 0.060662  |
| 35 | 6 | 0 | -3.575312 | -2.208363 | -0.731701 |
| 36 | 1 | 0 | -2.874173 | -2.438484 | -1.535159 |
| 37 | 1 | 0 | -3.222374 | -2.689995 | 0.185680  |
| 38 | 1 | 0 | -4.552768 | -2.632650 | -0.981182 |
| 39 | 6 | 0 | -4.072392 | -0.094143 | -1.916530 |
| 40 | 1 | 0 | -3.201749 | -0.144287 | -2.577210 |
| 41 | 1 | 0 | -4.875311 | -0.685057 | -2.368867 |
| 42 | 1 | 0 | -4.420230 | 0.938421  | -1.856883 |
| 43 | 6 | 0 | -1.446742 | 1.588776  | 1.454287  |



|    |   |   |           |           |           |
|----|---|---|-----------|-----------|-----------|
| 44 | 1 | 0 | -0.459813 | 1.171073  | 1.234009  |
| 45 | 1 | 0 | -1.315888 | 2.665775  | 1.594548  |
| 46 | 1 | 0 | -1.808157 | 1.158137  | 2.392813  |
| 47 | 6 | 0 | -1.953909 | 2.147306  | -0.915736 |
| 48 | 1 | 0 | -2.015107 | 3.211251  | -0.662991 |
| 49 | 1 | 0 | -0.915124 | 1.917910  | -1.155963 |
| 50 | 1 | 0 | -2.573076 | 1.976485  | -1.797396 |
| 51 | 8 | 0 | -1.362848 | -0.477394 | -0.771324 |
| 52 | 5 | 0 | 1.772244  | 2.786096  | -0.210538 |
| 53 | 9 | 0 | 0.857165  | 3.806408  | 0.050313  |
| 54 | 9 | 0 | 1.342725  | 2.046993  | -1.334455 |
| 55 | 9 | 0 | 1.836515  | 1.918497  | 0.895924  |
| 56 | 9 | 0 | 3.036564  | 3.315565  | -0.467006 |
| 57 | 8 | 0 | -1.645398 | -1.351532 | 2.032613  |
| 58 | 1 | 0 | -1.989941 | -2.262009 | 2.111862  |
| 59 | 1 | 0 | -2.255191 | -0.774372 | 1.201922  |
| 60 | 6 | 0 | -0.630539 | -2.654085 | -0.635138 |
| 61 | 1 | 0 | -0.551482 | -2.705051 | -1.700995 |
| 62 | 1 | 0 | -1.615071 | -2.947608 | -0.336074 |

-----

#### IM4A

Standard orientation:

-----

| Center | Atomic | Atomic | Coordinates (Angstroms) |          |           |
|--------|--------|--------|-------------------------|----------|-----------|
| Number | Number | Type   | X                       | Y        | Z         |
| 1      | 6      | 0      | -0.128034               | 1.891648 | 0.445637  |
| 2      | 6      | 0      | 0.879423                | 1.013385 | 0.350846  |
| 3      | 6      | 0      | 2.413305                | 2.795544 | -0.310635 |
| 4      | 6      | 0      | 1.179201                | 3.527621 | -0.821923 |

|    |   |   |           |           |           |
|----|---|---|-----------|-----------|-----------|
| 5  | 6 | 0 | 0.011027  | 3.354642  | 0.150976  |
| 6  | 1 | 0 | 0.751571  | -0.046167 | 0.550626  |
| 7  | 1 | 0 | -0.919318 | 3.740240  | -0.277709 |
| 8  | 1 | 0 | 2.735615  | 3.233788  | 0.645577  |
| 9  | 1 | 0 | 3.231954  | 2.906375  | -1.023110 |
| 10 | 1 | 0 | 0.899266  | 3.125123  | -1.802514 |
| 11 | 1 | 0 | 1.425110  | 4.585186  | -0.948085 |
| 12 | 1 | 0 | 0.193846  | 3.921979  | 1.072361  |
| 13 | 1 | 0 | -1.243324 | -0.231508 | -0.075675 |
| 14 | 7 | 0 | 2.140318  | 1.365260  | -0.120609 |
| 15 | 6 | 0 | 3.242153  | 0.523857  | 0.159024  |
| 16 | 6 | 0 | 4.360737  | 0.546724  | -0.687331 |
| 17 | 6 | 0 | 3.250050  | -0.336321 | 1.264683  |
| 18 | 6 | 0 | 5.455338  | -0.271001 | -0.430199 |
| 19 | 1 | 0 | 4.362906  | 1.190407  | -1.561388 |
| 20 | 6 | 0 | 4.343426  | -1.165506 | 1.503171  |
| 21 | 1 | 0 | 2.404523  | -0.353710 | 1.944932  |
| 22 | 6 | 0 | 5.454126  | -1.136311 | 0.663806  |
| 23 | 1 | 0 | 6.309357  | -0.240617 | -1.100629 |
| 24 | 1 | 0 | 4.328040  | -1.827074 | 2.364534  |
| 25 | 1 | 0 | 6.307502  | -1.778415 | 0.857915  |
| 26 | 6 | 0 | -3.811441 | -1.266975 | 0.850452  |
| 27 | 6 | 0 | -2.696737 | -0.391124 | 1.443725  |
| 28 | 6 | 0 | -2.840689 | 0.731650  | -0.952545 |
| 29 | 6 | 0 | -3.367241 | -0.603994 | -1.541159 |
| 30 | 6 | 0 | -3.465467 | -1.766983 | -0.545129 |
| 31 | 1 | 0 | -2.517053 | -2.311697 | -0.517983 |
| 32 | 1 | 0 | -4.753966 | -0.709424 | 0.828887  |
| 33 | 1 | 0 | -2.722761 | -0.899257 | -2.373552 |
| 34 | 1 | 0 | -4.354738 | -0.380605 | -1.958032 |

|    |   |   |           |           |           |
|----|---|---|-----------|-----------|-----------|
| 35 | 1 | 0 | -4.226601 | -2.472981 | -0.888315 |
| 36 | 1 | 0 | -3.953508 | -2.103299 | 1.542412  |
| 37 | 7 | 0 | -2.003837 | 0.377334  | 0.282971  |
| 38 | 6 | 0 | -1.919700 | 1.395297  | -1.975141 |
| 39 | 1 | 0 | -1.635731 | 2.408136  | -1.682945 |
| 40 | 1 | 0 | -1.023645 | 0.794788  | -2.154584 |
| 41 | 1 | 0 | -2.478541 | 1.463408  | -2.913521 |
| 42 | 6 | 0 | -3.956695 | 1.696610  | -0.567178 |
| 43 | 1 | 0 | -3.560102 | 2.558216  | -0.022700 |
| 44 | 1 | 0 | -4.407355 | 2.059905  | -1.495367 |
| 45 | 1 | 0 | -4.746552 | 1.226415  | 0.020722  |
| 46 | 6 | 0 | -1.596305 | -1.242327 | 2.071555  |
| 47 | 1 | 0 | -0.740417 | -0.622607 | 2.361689  |
| 48 | 1 | 0 | -1.996012 | -1.712204 | 2.974309  |
| 49 | 1 | 0 | -1.253975 | -2.030168 | 1.393610  |
| 50 | 6 | 0 | -3.258205 | 0.578507  | 2.479093  |
| 51 | 1 | 0 | -3.841244 | -0.023653 | 3.183008  |
| 52 | 1 | 0 | -2.465912 | 1.083849  | 3.033138  |
| 53 | 1 | 0 | -3.924152 | 1.325194  | 2.043413  |
| 54 | 8 | 0 | -1.419933 | 1.527449  | 0.867983  |
| 55 | 5 | 0 | 0.329194  | -2.495590 | -0.816001 |
| 56 | 9 | 0 | -0.384979 | -1.335361 | -1.245925 |
| 57 | 9 | 0 | -0.592536 | -3.504343 | -0.530711 |
| 58 | 9 | 0 | 1.038311  | -2.169493 | 0.344478  |
| 59 | 9 | 0 | 1.192950  | -2.887368 | -1.826931 |

-----

**TS4A**

Standard orientation:

-----

| Center | Atomic | Atomic | Coordinates (Angstroms) |  |  |
|--------|--------|--------|-------------------------|--|--|
|--------|--------|--------|-------------------------|--|--|

| Number | Number | Type | X         | Y         | Z         |
|--------|--------|------|-----------|-----------|-----------|
| 1      | 6      | 0    | -0.141130 | 1.894688  | 0.774243  |
| 2      | 6      | 0    | 0.967083  | 1.071666  | 0.674705  |
| 3      | 6      | 0    | 2.365844  | 2.911874  | -0.064863 |
| 4      | 6      | 0    | 1.089324  | 3.534990  | -0.617596 |
| 5      | 6      | 0    | -0.070162 | 3.343384  | 0.361646  |
| 6      | 1      | 0    | 0.872019  | 0.011377  | 0.896102  |
| 7      | 1      | 0    | -1.023097 | 3.659180  | -0.073878 |
| 8      | 1      | 0    | 2.671498  | 3.416372  | 0.860099  |
| 9      | 1      | 0    | 3.180808  | 3.001791  | -0.782008 |
| 10     | 1      | 0    | 0.852367  | 3.063096  | -1.578239 |
| 11     | 1      | 0    | 1.276067  | 4.596215  | -0.800428 |
| 12     | 1      | 0    | 0.088886  | 3.970061  | 1.248847  |
| 13     | 1      | 0    | -1.312913 | -0.337132 | -0.055293 |
| 14     | 7      | 0    | 2.167647  | 1.485045  | 0.241329  |
| 15     | 6      | 0    | 3.273653  | 0.588840  | 0.214365  |
| 16     | 6      | 0    | 4.181212  | 0.625505  | -0.848830 |
| 17     | 6      | 0    | 3.442805  | -0.342918 | 1.242940  |
| 18     | 6      | 0    | 5.247133  | -0.268083 | -0.877749 |
| 19     | 1      | 0    | 4.043268  | 1.328339  | -1.663990 |
| 20     | 6      | 0    | 4.504990  | -1.240884 | 1.195939  |
| 21     | 1      | 0    | 2.753957  | -0.355447 | 2.081610  |
| 22     | 6      | 0    | 5.413072  | -1.206035 | 0.140038  |
| 23     | 1      | 0    | 5.943196  | -0.236890 | -1.710345 |
| 24     | 1      | 0    | 4.627982  | -1.960630 | 1.999396  |
| 25     | 1      | 0    | 6.244670  | -1.902960 | 0.110725  |
| 26     | 6      | 0    | -4.057525 | -1.277435 | 0.387708  |
| 27     | 6      | 0    | -2.986064 | -0.490558 | 1.175889  |
| 28     | 6      | 0    | -2.707368 | 0.755911  | -1.081825 |

|    |   |   |           |           |           |
|----|---|---|-----------|-----------|-----------|
| 29 | 6 | 0 | -3.243171 | -0.495686 | -1.854089 |
| 30 | 6 | 0 | -3.521271 | -1.715715 | -0.968864 |
| 31 | 1 | 0 | -2.595619 | -2.286914 | -0.829228 |
| 32 | 1 | 0 | -4.955355 | -0.662954 | 0.254011  |
| 33 | 1 | 0 | -2.516255 | -0.767111 | -2.625557 |
| 34 | 1 | 0 | -4.159221 | -0.179709 | -2.366240 |
| 35 | 1 | 0 | -4.232832 | -2.378603 | -1.469470 |
| 36 | 1 | 0 | -4.347370 | -2.137211 | 1.000982  |
| 37 | 7 | 0 | -2.118305 | 0.253025  | 0.193200  |
| 38 | 6 | 0 | -1.610570 | 1.402053  | -1.931975 |
| 39 | 1 | 0 | -1.347936 | 2.397908  | -1.575546 |
| 40 | 1 | 0 | -0.713763 | 0.776489  | -1.972674 |
| 41 | 1 | 0 | -1.999748 | 1.508178  | -2.949414 |
| 42 | 6 | 0 | -3.800147 | 1.787968  | -0.814314 |
| 43 | 1 | 0 | -3.427586 | 2.573001  | -0.148167 |
| 44 | 1 | 0 | -4.072957 | 2.248207  | -1.768886 |
| 45 | 1 | 0 | -4.705387 | 1.353344  | -0.385990 |
| 46 | 6 | 0 | -2.059536 | -1.457356 | 1.914409  |
| 47 | 1 | 0 | -1.219062 | -0.918528 | 2.361559  |
| 48 | 1 | 0 | -2.622549 | -1.946877 | 2.714552  |
| 49 | 1 | 0 | -1.667921 | -2.229178 | 1.244577  |
| 50 | 6 | 0 | -3.651312 | 0.448799  | 2.184947  |
| 51 | 1 | 0 | -4.368159 | -0.148227 | 2.758214  |
| 52 | 1 | 0 | -2.925205 | 0.873877  | 2.878874  |
| 53 | 1 | 0 | -4.199209 | 1.260674  | 1.704261  |
| 54 | 8 | 0 | -1.255724 | 1.371995  | 1.235665  |
| 55 | 5 | 0 | 0.492620  | -2.453892 | -0.475477 |
| 56 | 9 | 0 | -0.084351 | -1.298120 | -1.070945 |
| 57 | 9 | 0 | -0.484711 | -3.450308 | -0.399725 |
| 58 | 9 | 0 | 0.923970  | -2.117770 | 0.814647  |

59            9            0            1.564375   -2.877000   -1.249358

-----  
**IM5A**

Standard orientation:

-----

| Center<br>Number | Atomic<br>Number | Atomic<br>Type | Coordinates (Angstroms) |           |           |
|------------------|------------------|----------------|-------------------------|-----------|-----------|
|                  |                  |                | X                       | Y         | Z         |
| 1                | 6                | 0              | 2.065346                | -1.479217 | -0.744486 |
| 2                | 6                | 0              | 0.607866                | -1.080053 | -0.830370 |
| 3                | 6                | 0              | 0.433495                | -0.988745 | 1.581505  |
| 4                | 6                | 0              | 1.554748                | -2.012730 | 1.633732  |
| 5                | 6                | 0              | 2.651357                | -1.686416 | 0.622082  |
| 6                | 1                | 0              | 0.173462                | -0.952709 | -1.818397 |
| 7                | 1                | 0              | 3.405078                | -2.474586 | 0.558676  |
| 8                | 1                | 0              | 0.775803                | 0.020989  | 1.827883  |
| 9                | 1                | 0              | -0.394237               | -1.262304 | 2.234675  |
| 10               | 1                | 0              | 1.138706                | -3.006558 | 1.437063  |
| 11               | 1                | 0              | 1.962256                | -2.015589 | 2.646915  |
| 12               | 1                | 0              | 3.154571                | -0.750976 | 0.891521  |
| 13               | 7                | 0              | -0.129045               | -0.904714 | 0.203638  |
| 14               | 6                | 0              | -1.528696               | -0.583621 | 0.063414  |
| 15               | 6                | 0              | -2.311482               | -1.358305 | -0.786800 |
| 16               | 6                | 0              | -2.054841               | 0.475757  | 0.798908  |
| 17               | 6                | 0              | -3.664537               | -1.053701 | -0.909772 |
| 18               | 1                | 0              | -1.875353               | -2.198058 | -1.319593 |
| 19               | 6                | 0              | -3.407408               | 0.766261  | 0.660778  |
| 20               | 1                | 0              | -1.408163               | 1.083992  | 1.421851  |
| 21               | 6                | 0              | -4.211476               | 0.004313  | -0.187767 |
| 22               | 1                | 0              | -4.289477               | -1.654126 | -1.562539 |

|    |   |   |           |           |           |
|----|---|---|-----------|-----------|-----------|
| 23 | 1 | 0 | -3.832445 | 1.597141  | 1.214220  |
| 24 | 1 | 0 | -5.267401 | 0.236178  | -0.284002 |
| 25 | 8 | 0 | 2.650258  | -1.614832 | -1.792864 |
| 26 | 5 | 0 | 1.102302  | 2.078329  | -0.146142 |
| 27 | 9 | 0 | 0.566445  | 2.160650  | 1.150656  |
| 28 | 9 | 0 | 0.097932  | 1.717376  | -1.049860 |
| 29 | 9 | 0 | 2.095866  | 1.073147  | -0.150439 |
| 30 | 9 | 0 | 1.666503  | 3.294978  | -0.506742 |

-----

## TEMPH

Standard orientation:

-----

| Center<br>Number | Atomic<br>Number | Atomic<br>Type | Coordinates (Angstroms) |           |           |
|------------------|------------------|----------------|-------------------------|-----------|-----------|
|                  |                  |                | X                       | Y         | Z         |
| 1                | 6                | 0              | 1.105339                | 0.997699  | -0.822257 |
| 2                | 6                | 0              | 1.258901                | -0.247407 | 0.083903  |
| 3                | 6                | 0              | -1.275372               | -0.223329 | 0.095209  |
| 4                | 6                | 0              | -1.326033               | 1.291789  | -0.275718 |
| 5                | 6                | 0              | 0.060146                | 1.946104  | -0.242523 |
| 6                | 1                | 0              | 0.330619                | 2.189093  | 0.793356  |
| 7                | 1                | 0              | 0.799157                | 0.697518  | -1.833447 |
| 8                | 1                | 0              | -1.997189               | 1.822108  | 0.410570  |
| 9                | 1                | 0              | -1.755220               | 1.402859  | -1.279763 |
| 10               | 1                | 0              | 0.042330                | 2.893865  | -0.790790 |
| 11               | 1                | 0              | 2.079223                | 1.491644  | -0.923628 |
| 12               | 6                | 0              | -2.394150               | -0.547731 | 1.086711  |
| 13               | 1                | 0              | -2.405009               | -1.617096 | 1.323831  |
| 14               | 1                | 0              | -2.257254               | 0.011876  | 2.020097  |
| 15               | 1                | 0              | -3.368090               | -0.271958 | 0.668426  |

|    |   |   |           |           |           |
|----|---|---|-----------|-----------|-----------|
| 16 | 6 | 0 | -1.486466 | -1.081286 | -1.157405 |
| 17 | 1 | 0 | -1.351992 | -2.142812 | -0.921917 |
| 18 | 1 | 0 | -2.505051 | -0.935022 | -1.534050 |
| 19 | 1 | 0 | -0.799329 | -0.814569 | -1.965497 |
| 20 | 6 | 0 | 2.275691  | 0.048083  | 1.190916  |
| 21 | 1 | 0 | 2.307993  | -0.782053 | 1.905747  |
| 22 | 1 | 0 | 3.277347  | 0.179424  | 0.769694  |
| 23 | 1 | 0 | 2.012431  | 0.960407  | 1.739336  |
| 24 | 6 | 0 | 1.774683  | -1.440123 | -0.726946 |
| 25 | 1 | 0 | 2.726030  | -1.185175 | -1.208976 |
| 26 | 1 | 0 | 1.939997  | -2.302270 | -0.071251 |
| 27 | 1 | 0 | 1.072000  | -1.736422 | -1.509797 |
| 28 | 7 | 0 | -0.012625 | -0.600884 | 0.764698  |
| 29 | 1 | 0 | -0.016057 | -0.118027 | 1.663828  |

-----

**CH<sub>2</sub>(CO<sub>2</sub>Me)<sub>2</sub>**

Standard orientation:

-----

| Center | Atomic | Atomic | Coordinates (Angstroms) |           |           |
|--------|--------|--------|-------------------------|-----------|-----------|
| Number | Number | Type   | X                       | Y         | Z         |
| 1      | 6      | 0      | -0.061875               | 0.992395  | -0.526233 |
| 2      | 1      | 0      | -0.111434               | 0.931390  | -1.616378 |
| 3      | 1      | 0      | -0.260598               | 2.023478  | -0.222892 |
| 4      | 6      | 0      | -1.121361               | 0.095428  | 0.077855  |
| 5      | 8      | 0      | -0.931330               | -0.680398 | 0.984837  |
| 6      | 8      | 0      | -2.303466               | 0.289299  | -0.506418 |
| 7      | 6      | 0      | -3.386270               | -0.485939 | 0.025364  |
| 8      | 1      | 0      | -4.263581               | -0.204235 | -0.554733 |
| 9      | 1      | 0      | -3.180379               | -1.552209 | -0.089036 |



|    |   |   |           |           |           |
|----|---|---|-----------|-----------|-----------|
| 10 | 1 | 0 | -3.536600 | -0.252602 | 1.081504  |
| 11 | 6 | 0 | 1.300927  | 0.578305  | -0.026247 |
| 12 | 8 | 0 | 1.943285  | 1.171897  | 0.806088  |
| 13 | 8 | 0 | 1.707523  | -0.546220 | -0.620038 |
| 14 | 6 | 0 | 2.967824  | -1.055028 | -0.169466 |
| 15 | 1 | 0 | 3.142952  | -1.964368 | -0.742311 |
| 16 | 1 | 0 | 3.761200  | -0.328485 | -0.357911 |
| 17 | 1 | 0 | 2.924876  | -1.280566 | 0.898365  |

-----

### TS5A

Standard orientation:

-----

| Center<br>Number | Atomic<br>Number | Atomic<br>Type | Coordinates (Angstroms) |           |           |
|------------------|------------------|----------------|-------------------------|-----------|-----------|
|                  |                  |                | X                       | Y         | Z         |
| 1                | 5                | 0              | -0.742962               | 2.581550  | -1.448608 |
| 2                | 9                | 0              | -0.631850               | 2.801004  | -2.824094 |
| 3                | 9                | 0              | 0.036966                | 1.445493  | -1.088737 |
| 4                | 9                | 0              | -2.090187               | 2.338615  | -1.119113 |
| 5                | 9                | 0              | -0.263958               | 3.701571  | -0.743418 |
| 6                | 6                | 0              | 3.019600                | 0.528055  | 0.762926  |
| 7                | 1                | 0              | 3.759984                | 1.311927  | 0.659758  |
| 8                | 1                | 0              | 0.095665                | -0.695720 | 1.008634  |
| 9                | 6                | 0              | 1.800307                | 0.864306  | 1.394172  |
| 10               | 8                | 0              | 0.814445                | 0.138608  | 1.641009  |
| 11               | 8                | 0              | 1.812951                | 2.178720  | 1.801608  |
| 12               | 6                | 0              | 0.561311                | 2.781706  | 2.140449  |
| 13               | 1                | 0              | 0.803322                | 3.692117  | 2.696959  |
| 14               | 1                | 0              | 0.039990                | 3.045075  | 1.215847  |
| 15               | 1                | 0              | -0.049344               | 2.127812  | 2.766353  |

|    |   |   |           |           |           |
|----|---|---|-----------|-----------|-----------|
| 16 | 6 | 0 | 3.309350  | -0.726520 | 0.173508  |
| 17 | 8 | 0 | 2.628813  | -1.759069 | 0.121687  |
| 18 | 8 | 0 | 4.559400  | -0.704246 | -0.439881 |
| 19 | 6 | 0 | 4.907720  | -1.878173 | -1.172625 |
| 20 | 1 | 0 | 5.843395  | -1.643394 | -1.686505 |
| 21 | 1 | 0 | 5.061458  | -2.739624 | -0.512254 |
| 22 | 1 | 0 | 4.140015  | -2.137632 | -1.908864 |
| 23 | 6 | 0 | -2.383684 | -2.311702 | -1.384871 |
| 24 | 6 | 0 | -0.999382 | -2.102245 | -0.698467 |
| 25 | 6 | 0 | -2.337674 | -0.781292 | 1.210546  |
| 26 | 6 | 0 | -3.616263 | -1.209832 | 0.437101  |
| 27 | 6 | 0 | -3.381093 | -1.186982 | -1.074733 |
| 28 | 1 | 0 | -2.997125 | -0.209302 | -1.397675 |
| 29 | 1 | 0 | -2.818329 | -3.248965 | -1.012787 |
| 30 | 1 | 0 | -4.462282 | -0.587526 | 0.746082  |
| 31 | 1 | 0 | -3.868837 | -2.242060 | 0.709371  |
| 32 | 1 | 0 | -4.319879 | -1.342685 | -1.617107 |
| 33 | 1 | 0 | -2.236959 | -2.434148 | -2.462769 |
| 34 | 6 | 0 | -2.414413 | 0.696103  | 1.611563  |
| 35 | 1 | 0 | -1.499328 | 1.006101  | 2.119422  |
| 36 | 1 | 0 | -2.571069 | 1.339208  | 0.741247  |
| 37 | 1 | 0 | -3.261846 | 0.826470  | 2.292491  |
| 38 | 6 | 0 | -2.114058 | -1.640578 | 2.460263  |
| 39 | 1 | 0 | -1.118269 | -1.479181 | 2.888652  |
| 40 | 1 | 0 | -2.854922 | -1.355642 | 3.215202  |
| 41 | 1 | 0 | -2.246890 | -2.706540 | 2.258426  |
| 42 | 6 | 0 | 0.093572  | -1.749678 | -1.720525 |
| 43 | 1 | 0 | 1.072475  | -1.755008 | -1.229617 |
| 44 | 1 | 0 | 0.104809  | -2.535655 | -2.483934 |
| 45 | 1 | 0 | -0.093282 | -0.793437 | -2.217458 |

|    |   |   |           |           |           |
|----|---|---|-----------|-----------|-----------|
| 46 | 6 | 0 | -0.540606 | -3.344714 | 0.068957  |
| 47 | 1 | 0 | -0.415141 | -4.169090 | -0.642885 |
| 48 | 1 | 0 | 0.432607  | -3.158521 | 0.538741  |
| 49 | 1 | 0 | -1.263177 | -3.682224 | 0.813330  |
| 50 | 7 | 0 | -1.121612 | -0.902765 | 0.259580  |
| 51 | 1 | 0 | -1.122676 | -0.063733 | -0.339387 |

-----

**TEMPH<sub>2</sub>BF<sub>4</sub>**

Standard orientation:

-----

| Center<br>Number | Atomic<br>Number | Atomic<br>Type | Coordinates (Angstroms) |           |           |
|------------------|------------------|----------------|-------------------------|-----------|-----------|
|                  |                  |                | X                       | Y         | Z         |
| 1                | 6                | 0              | 2.551557                | 1.315867  | -0.027767 |
| 2                | 6                | 0              | 1.030670                | 1.321983  | 0.186259  |
| 3                | 6                | 0              | 1.374059                | -1.297719 | 0.121571  |
| 4                | 6                | 0              | 2.691112                | -1.121558 | -0.670492 |
| 5                | 6                | 0              | 2.946792                | 0.323623  | -1.119771 |
| 6                | 1                | 0              | 2.375935                | 0.537338  | -2.032359 |
| 7                | 1                | 0              | 3.064955                | 1.060327  | 0.906907  |
| 8                | 1                | 0              | 2.681061                | -1.780489 | -1.544281 |
| 9                | 1                | 0              | 3.512693                | -1.453834 | -0.027133 |
| 10               | 1                | 0              | 4.002745                | 0.441454  | -1.377256 |
| 11               | 1                | 0              | 2.854272                | 2.333996  | -0.292139 |
| 12               | 6                | 0              | 0.555852                | -2.478599 | -0.396764 |
| 13               | 1                | 0              | -0.376849               | -2.584809 | 0.167303  |
| 14               | 1                | 0              | 0.315962                | -2.354271 | -1.458265 |
| 15               | 1                | 0              | 1.141016                | -3.395222 | -0.281751 |
| 16               | 6                | 0              | 1.615632                | -1.460295 | 1.620015  |
| 17               | 1                | 0              | 0.669981                | -1.436683 | 2.173494  |

|    |   |   |           |           |           |
|----|---|---|-----------|-----------|-----------|
| 18 | 1 | 0 | 2.085151  | -2.434590 | 1.784859  |
| 19 | 1 | 0 | 2.286349  | -0.697018 | 2.020968  |
| 20 | 6 | 0 | 0.328529  | 2.241004  | -0.813086 |
| 21 | 1 | 0 | -0.758279 | 2.139662  | -0.727123 |
| 22 | 1 | 0 | 0.600314  | 3.277920  | -0.598080 |
| 23 | 1 | 0 | 0.625154  | 2.012140  | -1.842670 |
| 24 | 6 | 0 | 0.631970  | 1.717708  | 1.603657  |
| 25 | 1 | 0 | 0.982112  | 2.737474  | 1.789607  |
| 26 | 1 | 0 | -0.458238 | 1.703232  | 1.711868  |
| 27 | 1 | 0 | 1.073625  | 1.064711  | 2.359322  |
| 28 | 7 | 0 | 0.496558  | -0.079882 | -0.107553 |
| 29 | 1 | 0 | 0.191024  | -0.107435 | -1.088324 |
| 30 | 5 | 0 | -2.761633 | -0.084470 | -0.115384 |
| 31 | 9 | 0 | -2.047177 | -0.551705 | 1.023058  |
| 32 | 9 | 0 | -2.006090 | -0.413655 | -1.254221 |
| 33 | 9 | 0 | -4.003969 | -0.695654 | -0.165161 |
| 34 | 9 | 0 | -2.889089 | 1.301775  | -0.021959 |
| 35 | 1 | 0 | -0.376834 | -0.221321 | 0.427653  |

-----

## IM6A

Standard orientation:

-----

| Center | Atomic | Atomic | Coordinates (Angstroms) |           |           |
|--------|--------|--------|-------------------------|-----------|-----------|
| Number | Number | Type   | X                       | Y         | Z         |
| 1      | 6      | 0      | -0.007969               | -0.568170 | 0.024161  |
| 2      | 1      | 0      | 0.002430                | -1.652066 | 0.015866  |
| 3      | 6      | 0      | -1.255333               | 0.079815  | -0.030207 |
| 4      | 8      | 0      | -1.516637               | 1.297135  | 0.095701  |
| 5      | 8      | 0      | -2.289008               | -0.803913 | -0.120361 |

|    |   |   |           |           |           |
|----|---|---|-----------|-----------|-----------|
| 6  | 6 | 0 | -3.585815 | -0.250631 | 0.036813  |
| 7  | 1 | 0 | -4.272468 | -1.099104 | 0.009985  |
| 8  | 1 | 0 | -3.676561 | 0.275442  | 0.990248  |
| 9  | 1 | 0 | -3.818433 | 0.442482  | -0.774816 |
| 10 | 6 | 0 | 1.256349  | 0.098470  | -0.004822 |
| 11 | 8 | 0 | 1.525107  | 1.291542  | -0.101801 |
| 12 | 8 | 0 | 2.282648  | -0.812806 | 0.069933  |
| 13 | 6 | 0 | 3.586269  | -0.254095 | 0.010701  |
| 14 | 1 | 0 | 4.279285  | -1.093614 | 0.087492  |
| 15 | 1 | 0 | 3.750455  | 0.275523  | -0.932386 |
| 16 | 1 | 0 | 3.757399  | 0.443327  | 0.835964  |

-----

### IM7A

Standard orientation:

-----

| Center | Atomic | Atomic | Coordinates (Angstroms) |           |           |
|--------|--------|--------|-------------------------|-----------|-----------|
| Number | Number | Type   | X                       | Y         | Z         |
| 1      | 6      | 0      | -2.605723               | 0.780357  | -0.305463 |
| 2      | 6      | 0      | -1.093855               | 0.848069  | -0.330492 |
| 3      | 6      | 0      | -0.924393               | -1.506388 | 0.202138  |
| 4      | 6      | 0      | -2.272964               | -1.378537 | 0.890245  |
| 5      | 6      | 0      | -3.238173               | -0.529723 | 0.065409  |
| 6      | 1      | 0      | -0.632057               | 1.801038  | -0.574855 |
| 7      | 1      | 0      | -4.169624               | -0.324914 | 0.598118  |
| 8      | 1      | 0      | -0.995902               | -1.998267 | -0.772738 |
| 9      | 1      | 0      | -0.201865               | -2.033497 | 0.824002  |
| 10     | 1      | 0      | -2.126586               | -0.934735 | 1.880738  |
| 11     | 1      | 0      | -2.676791               | -2.383428 | 1.030702  |
| 12     | 1      | 0      | -3.484545               | -1.035245 | -0.875132 |

|    |   |   |           |           |           |
|----|---|---|-----------|-----------|-----------|
| 13 | 7 | 0 | -0.346395 | -0.157969 | -0.061897 |
| 14 | 6 | 0 | 1.089915  | -0.022405 | -0.041329 |
| 15 | 6 | 0 | 1.653375  | 1.024615  | 0.681177  |
| 16 | 6 | 0 | 1.865479  | -0.954970 | -0.726081 |
| 17 | 6 | 0 | 3.040249  | 1.144791  | 0.709493  |
| 18 | 1 | 0 | 1.019715  | 1.714061  | 1.231088  |
| 19 | 6 | 0 | 3.248373  | -0.816822 | -0.688277 |
| 20 | 1 | 0 | 1.392516  | -1.735411 | -1.312099 |
| 21 | 6 | 0 | 3.835670  | 0.226743  | 0.028084  |
| 22 | 1 | 0 | 3.494518  | 1.951236  | 1.275577  |
| 23 | 1 | 0 | 3.868829  | -1.524849 | -1.227767 |
| 24 | 1 | 0 | 4.916476  | 0.322147  | 0.055600  |
| 25 | 8 | 0 | -3.195954 | 1.799158  | -0.576171 |

-----

### TS6A

Standard orientation:

-----

| Center<br>Number | Atomic<br>Number | Atomic<br>Type | Coordinates (Angstroms) |          |           |
|------------------|------------------|----------------|-------------------------|----------|-----------|
|                  |                  |                | X                       | Y        | Z         |
| 1                | 6                | 0              | -0.784409               | 2.618248 | -0.604888 |
| 2                | 6                | 0              | 1.373388                | 2.037361 | 1.209491  |
| 3                | 6                | 0              | 0.019765                | 2.507685 | 1.734424  |
| 4                | 6                | 0              | -0.649187               | 3.388982 | 0.684422  |
| 5                | 1                | 0              | -0.035410               | 4.272847 | 0.462513  |
| 6                | 1                | 0              | 1.855752                | 1.348205 | 1.904333  |
| 7                | 1                | 0              | 2.054933                | 2.869457 | 1.010247  |
| 8                | 1                | 0              | 0.156380                | 3.027022 | 2.683854  |
| 9                | 1                | 0              | -0.607748               | 1.623281 | 1.855363  |
| 10               | 1                | 0              | -1.636132               | 3.744617 | 0.992731  |

|    |   |   |           |           |           |
|----|---|---|-----------|-----------|-----------|
| 11 | 7 | 0 | 1.180364  | 1.261695  | -0.050263 |
| 12 | 6 | 0 | 2.207555  | 0.328774  | -0.440661 |
| 13 | 6 | 0 | 1.863167  | -0.915501 | -0.963147 |
| 14 | 6 | 0 | 3.539971  | 0.720946  | -0.317626 |
| 15 | 6 | 0 | 2.879565  | -1.779946 | -1.360823 |
| 16 | 1 | 0 | 0.821192  | -1.217948 | -1.007133 |
| 17 | 6 | 0 | 4.542915  | -0.156879 | -0.719176 |
| 18 | 1 | 0 | 3.794433  | 1.705726  | 0.058227  |
| 19 | 6 | 0 | 4.216551  | -1.407755 | -1.238898 |
| 20 | 1 | 0 | 2.618571  | -2.756209 | -1.757262 |
| 21 | 1 | 0 | 5.581172  | 0.146292  | -0.631189 |
| 22 | 1 | 0 | 5.002235  | -2.090584 | -1.546592 |
| 23 | 8 | 0 | -1.426988 | 2.977399  | -1.569610 |
| 24 | 6 | 0 | 0.098868  | 1.415552  | -0.759170 |
| 25 | 1 | 0 | -0.016406 | 0.832868  | -1.668824 |
| 26 | 6 | 0 | -1.933172 | -0.904164 | 0.749044  |
| 27 | 1 | 0 | -2.141373 | -0.217539 | 1.521023  |
| 28 | 6 | 0 | -0.811173 | -1.770605 | 0.858635  |
| 29 | 8 | 0 | -0.457877 | -2.683076 | 0.126447  |
| 30 | 8 | 0 | -0.096673 | -1.484504 | 1.998493  |
| 31 | 6 | 0 | -2.949310 | -1.127530 | -0.262752 |
| 32 | 8 | 0 | -2.910646 | -1.825575 | -1.269793 |
| 33 | 8 | 0 | -4.076886 | -0.437293 | 0.068010  |
| 34 | 6 | 0 | -5.090372 | -0.419374 | -0.926166 |
| 35 | 1 | 0 | -5.489468 | -1.421460 | -1.105134 |
| 36 | 1 | 0 | -5.878161 | 0.229478  | -0.541427 |
| 37 | 1 | 0 | -4.705321 | -0.016472 | -1.867659 |
| 38 | 6 | 0 | 1.115097  | -2.218517 | 2.129226  |
| 39 | 1 | 0 | 1.757268  | -1.628869 | 2.785263  |
| 40 | 1 | 0 | 0.929688  | -3.197263 | 2.584377  |

|    |   |   |          |           |          |
|----|---|---|----------|-----------|----------|
| 41 | 1 | 0 | 1.593087 | -2.364589 | 1.159154 |
|----|---|---|----------|-----------|----------|

---

### 3a

Standard orientation:

---

| Center<br>Number | Atomic<br>Number | Atomic<br>Type | Coordinates (Angstroms) |           |           |
|------------------|------------------|----------------|-------------------------|-----------|-----------|
|                  |                  |                | X                       | Y         | Z         |
| 1                | 6                | 0              | -1.521393               | 2.025799  | -0.666159 |
| 2                | 6                | 0              | 1.065208                | 2.291415  | 0.709012  |
| 3                | 6                | 0              | -0.172078               | 3.131968  | 0.998520  |
| 4                | 6                | 0              | -0.958000               | 3.367096  | -0.296599 |
| 5                | 1                | 0              | -0.282320               | 3.719097  | -1.086692 |
| 6                | 1                | 0              | 1.467888                | 1.865915  | 1.638366  |
| 7                | 1                | 0              | 1.833420                | 2.947157  | 0.282030  |
| 8                | 1                | 0              | 0.141097                | 4.080381  | 1.441152  |
| 9                | 1                | 0              | -0.817126               | 2.629777  | 1.729679  |
| 10               | 1                | 0              | -1.776970               | 4.079813  | -0.181605 |
| 11               | 7                | 0              | 0.793010                | 1.229208  | -0.261596 |
| 12               | 6                | 0              | 1.830212                | 0.349105  | -0.566384 |
| 13               | 6                | 0              | 1.614340                | -0.843512 | -1.290060 |
| 14               | 6                | 0              | 3.148856                | 0.622646  | -0.144895 |
| 15               | 6                | 0              | 2.671928                | -1.696245 | -1.591158 |
| 16               | 1                | 0              | 0.619236                | -1.138155 | -1.604236 |
| 17               | 6                | 0              | 4.193611                | -0.241668 | -0.456832 |
| 18               | 1                | 0              | 3.370165                | 1.514189  | 0.428163  |
| 19               | 6                | 0              | 3.972587                | -1.408702 | -1.183950 |
| 20               | 1                | 0              | 2.463157                | -2.605625 | -2.147849 |
| 21               | 1                | 0              | 5.195187                | 0.007461  | -0.117122 |
| 22               | 1                | 0              | 4.790920                | -2.081011 | -1.420234 |



|    |   |   |           |           |           |
|----|---|---|-----------|-----------|-----------|
| 23 | 8 | 0 | -2.682084 | 1.821101  | -0.951883 |
| 24 | 6 | 0 | -0.564644 | 0.834334  | -0.547052 |
| 25 | 1 | 0 | -0.584590 | 0.370859  | -1.537292 |
| 26 | 6 | 0 | -1.243351 | -0.183302 | 0.435802  |
| 27 | 1 | 0 | -1.709316 | 0.362824  | 1.262294  |
| 28 | 6 | 0 | -0.283808 | -1.184533 | 1.061434  |
| 29 | 8 | 0 | -0.297675 | -2.375645 | 0.857258  |
| 30 | 8 | 0 | 0.556687  | -0.577147 | 1.897601  |
| 31 | 6 | 0 | -2.301893 | -0.966742 | -0.318823 |
| 32 | 8 | 0 | -2.170797 | -1.360681 | -1.453842 |
| 33 | 8 | 0 | -3.374030 | -1.196497 | 0.434466  |
| 34 | 6 | 0 | -4.409023 | -1.964975 | -0.192713 |
| 35 | 1 | 0 | -4.030388 | -2.948994 | -0.476836 |
| 36 | 1 | 0 | -5.198452 | -2.060887 | 0.550997  |
| 37 | 1 | 0 | -4.779894 | -1.444365 | -1.078165 |
| 38 | 6 | 0 | 1.605320  | -1.402050 | 2.420296  |
| 39 | 1 | 0 | 2.242742  | -0.737181 | 3.001566  |
| 40 | 1 | 0 | 1.190347  | -2.186639 | 3.056733  |
| 41 | 1 | 0 | 2.169784  | -1.851903 | 1.598789  |

-----

### TS7A

Standard orientation:

-----

| Center<br>Number | Atomic<br>Number | Atomic<br>Type | Coordinates (Angstroms) |           |          |
|------------------|------------------|----------------|-------------------------|-----------|----------|
|                  |                  |                | X                       | Y         | Z        |
| 1                | 6                | 0              | 0.479078                | -0.867926 | 1.065069 |
| 2                | 6                | 0              | -0.471892               | 0.004826  | 0.282279 |
| 3                | 6                | 0              | -1.984480               | 0.301339  | 2.156840 |
| 4                | 6                | 0              | -0.855878               | -0.188839 | 3.050417 |

|    |   |   |           |           |           |
|----|---|---|-----------|-----------|-----------|
| 5  | 6 | 0 | -0.120436 | -1.343703 | 2.375708  |
| 6  | 1 | 0 | -0.246426 | 0.222089  | -0.758460 |
| 7  | 1 | 0 | -0.818815 | -2.160772 | 2.165421  |
| 8  | 1 | 0 | -2.440940 | 1.213974  | 2.539435  |
| 9  | 1 | 0 | -2.769888 | -0.452552 | 2.038049  |
| 10 | 1 | 0 | -1.288513 | -0.500955 | 4.004907  |
| 11 | 1 | 0 | -0.158349 | 0.632706  | 3.251812  |
| 12 | 1 | 0 | 0.688130  | -1.722418 | 3.007059  |
| 13 | 1 | 0 | 0.764958  | -1.693436 | 0.418070  |
| 14 | 7 | 0 | -1.506104 | 0.592034  | 0.781718  |
| 15 | 6 | 0 | -2.228495 | 1.591207  | 0.013438  |
| 16 | 6 | 0 | -2.358611 | 2.860694  | 0.577013  |
| 17 | 6 | 0 | -2.693903 | 1.300539  | -1.263438 |
| 18 | 6 | 0 | -2.990512 | 3.862229  | -0.150559 |
| 19 | 1 | 0 | -1.948956 | 3.074972  | 1.560127  |
| 20 | 6 | 0 | -3.322250 | 2.320196  | -1.976072 |
| 21 | 1 | 0 | -2.572548 | 0.296853  | -1.662640 |
| 22 | 6 | 0 | -3.478194 | 3.589572  | -1.427059 |
| 23 | 1 | 0 | -3.092852 | 4.853809  | 0.277879  |
| 24 | 1 | 0 | -3.699233 | 2.108122  | -2.971117 |
| 25 | 1 | 0 | -3.976073 | 4.370202  | -1.993604 |
| 26 | 6 | 0 | 3.910597  | 1.958015  | -0.658356 |
| 27 | 6 | 0 | 2.657908  | 1.686997  | 0.203351  |
| 28 | 6 | 0 | 3.614959  | -0.675693 | 0.253211  |
| 29 | 6 | 0 | 4.363943  | -0.455095 | -1.089467 |
| 30 | 6 | 0 | 4.071498  | 0.899912  | -1.740792 |
| 31 | 1 | 0 | 3.151108  | 0.842082  | -2.332943 |
| 32 | 1 | 0 | 4.808828  | 1.972722  | -0.029526 |
| 33 | 1 | 0 | 4.104932  | -1.259273 | -1.786418 |
| 34 | 1 | 0 | 5.438813  | -0.544402 | -0.890215 |

|    |   |   |           |           |           |
|----|---|---|-----------|-----------|-----------|
| 35 | 1 | 0 | 4.876258  | 1.167867  | -2.432291 |
| 36 | 1 | 0 | 3.819905  | 2.960789  | -1.089046 |
| 37 | 7 | 0 | 2.409960  | 0.206376  | 0.225109  |
| 38 | 6 | 0 | 3.169390  | -2.141200 | 0.307404  |
| 39 | 1 | 0 | 2.723858  | -2.392388 | 1.275631  |
| 40 | 1 | 0 | 2.459792  | -2.380881 | -0.490352 |
| 41 | 1 | 0 | 4.053152  | -2.774498 | 0.176939  |
| 42 | 6 | 0 | 4.531972  | -0.441569 | 1.467009  |
| 43 | 1 | 0 | 3.945006  | -0.461305 | 2.390369  |
| 44 | 1 | 0 | 5.272968  | -1.246125 | 1.518277  |
| 45 | 1 | 0 | 5.081013  | 0.500988  | 1.416302  |
| 46 | 6 | 0 | 1.448761  | 2.350903  | -0.468252 |
| 47 | 1 | 0 | 0.551076  | 2.261461  | 0.151099  |
| 48 | 1 | 0 | 1.636838  | 3.421315  | -0.599537 |
| 49 | 1 | 0 | 1.245198  | 1.911386  | -1.450472 |
| 50 | 6 | 0 | 2.829096  | 2.325769  | 1.589535  |
| 51 | 1 | 0 | 3.066817  | 3.386754  | 1.454705  |
| 52 | 1 | 0 | 1.908383  | 2.252562  | 2.172521  |
| 53 | 1 | 0 | 3.635224  | 1.870527  | 2.166199  |
| 54 | 8 | 0 | 1.621022  | -0.066636 | 1.386385  |
| 55 | 6 | 0 | -1.660785 | -2.515319 | -0.622820 |
| 56 | 1 | 0 | -1.358413 | -3.392955 | -0.066704 |
| 57 | 6 | 0 | -0.780462 | -2.043147 | -1.627154 |
| 58 | 8 | 0 | -0.887218 | -1.101380 | -2.411561 |
| 59 | 8 | 0 | 0.400831  | -2.771202 | -1.607912 |
| 60 | 6 | 0 | 1.417200  | -2.275039 | -2.459553 |
| 61 | 1 | 0 | 2.216691  | -3.019157 | -2.441956 |
| 62 | 1 | 0 | 1.049369  | -2.134182 | -3.477787 |
| 63 | 1 | 0 | 1.800203  | -1.315624 | -2.085390 |
| 64 | 6 | 0 | -2.881244 | -1.900269 | -0.258084 |

|    |   |   |           |           |           |
|----|---|---|-----------|-----------|-----------|
| 65 | 8 | 0 | -3.421703 | -0.883921 | -0.688350 |
| 66 | 8 | 0 | -3.459363 | -2.563125 | 0.821106  |
| 67 | 6 | 0 | -4.803513 | -2.204512 | 1.079459  |
| 68 | 1 | 0 | -5.080341 | -2.704270 | 2.008947  |
| 69 | 1 | 0 | -4.926942 | -1.121634 | 1.175392  |
| 70 | 1 | 0 | -5.458265 | -2.542455 | 0.269406  |

-----

**3a'**

Standard orientation:

-----

| Center<br>Number | Atomic<br>Number | Atomic<br>Type | Coordinates (Angstroms) |           |           |
|------------------|------------------|----------------|-------------------------|-----------|-----------|
|                  |                  |                | X                       | Y         | Z         |
| 1                | 6                | 0              | -0.479478               | -0.727901 | -0.233451 |
| 2                | 6                | 0              | 0.696782                | 0.091018  | 0.251812  |
| 3                | 6                | 0              | 1.165433                | 0.472295  | -2.071746 |
| 4                | 6                | 0              | 0.975964                | -1.019193 | -2.323020 |
| 5                | 6                | 0              | -0.012466               | -1.668790 | -1.340935 |
| 6                | 1                | 0              | 0.460399                | 0.794754  | 1.039206  |
| 7                | 1                | 0              | 0.439786                | -2.533873 | -0.854585 |
| 8                | 1                | 0              | 0.273960                | 1.043833  | -2.341041 |
| 9                | 1                | 0              | 2.014284                | 0.873695  | -2.622478 |
| 10               | 1                | 0              | 1.952154                | -1.506004 | -2.240942 |
| 11               | 1                | 0              | 0.641184                | -1.140987 | -3.356664 |
| 12               | 1                | 0              | -0.900620               | -2.031175 | -1.854506 |
| 13               | 1                | 0              | -0.968128               | -1.291717 | 0.574369  |
| 14               | 7                | 0              | 1.400345                | 0.720698  | -0.627953 |
| 15               | 6                | 0              | 2.432754                | 1.638016  | -0.226897 |
| 16               | 6                | 0              | 3.704467                | 1.515496  | -0.784864 |
| 17               | 6                | 0              | 2.151866                | 2.618287  | 0.721401  |

|    |   |   |           |           |           |
|----|---|---|-----------|-----------|-----------|
| 18 | 6 | 0 | 4.705194  | 2.394936  | -0.383108 |
| 19 | 1 | 0 | 3.914263  | 0.727293  | -1.500882 |
| 20 | 6 | 0 | 3.163607  | 3.487467  | 1.120216  |
| 21 | 1 | 0 | 1.147337  | 2.712983  | 1.123794  |
| 22 | 6 | 0 | 4.437907  | 3.379280  | 0.567468  |
| 23 | 1 | 0 | 5.698557  | 2.303537  | -0.810453 |
| 24 | 1 | 0 | 2.948049  | 4.258209  | 1.853111  |
| 25 | 1 | 0 | 5.222725  | 4.063073  | 0.875129  |
| 26 | 6 | 0 | -4.492112 | 1.274905  | 0.988513  |
| 27 | 6 | 0 | -2.965166 | 1.118312  | 0.828320  |
| 28 | 6 | 0 | -3.645719 | 0.065577  | -1.397666 |
| 29 | 6 | 0 | -5.050683 | -0.307856 | -0.840709 |
| 30 | 6 | 0 | -5.192215 | -0.036610 | 0.657626  |
| 31 | 1 | 0 | -4.727600 | -0.851922 | 1.222298  |
| 32 | 1 | 0 | -4.869186 | 2.066949  | 0.330074  |
| 33 | 1 | 0 | -5.264921 | -1.359628 | -1.051936 |
| 34 | 1 | 0 | -5.789507 | 0.292566  | -1.385732 |
| 35 | 1 | 0 | -6.249336 | -0.009910 | 0.941281  |
| 36 | 1 | 0 | -4.695344 | 1.597312  | 2.015937  |
| 37 | 7 | 0 | -2.710826 | 0.089623  | -0.234707 |
| 38 | 6 | 0 | -3.206096 | -1.036524 | -2.361723 |
| 39 | 1 | 0 | -2.266410 | -0.782351 | -2.858915 |
| 40 | 1 | 0 | -3.095173 | -1.986611 | -1.833438 |
| 41 | 1 | 0 | -3.975190 | -1.152177 | -3.133438 |
| 42 | 6 | 0 | -3.689843 | 1.378384  | -2.196957 |
| 43 | 1 | 0 | -2.684237 | 1.658373  | -2.529440 |
| 44 | 1 | 0 | -4.312746 | 1.233580  | -3.086658 |
| 45 | 1 | 0 | -4.115888 | 2.209961  | -1.631841 |
| 46 | 6 | 0 | -2.409507 | 0.571219  | 2.149374  |
| 47 | 1 | 0 | -1.354626 | 0.292387  | 2.060970  |

|    |   |   |           |           |           |
|----|---|---|-----------|-----------|-----------|
| 48 | 1 | 0 | -2.479441 | 1.341399  | 2.925022  |
| 49 | 1 | 0 | -2.964770 | -0.314469 | 2.478943  |
| 50 | 6 | 0 | -2.301022 | 2.474483  | 0.568127  |
| 51 | 1 | 0 | -2.632719 | 3.180562  | 1.337440  |
| 52 | 1 | 0 | -1.211473 | 2.394179  | 0.630977  |
| 53 | 1 | 0 | -2.557382 | 2.890679  | -0.407747 |
| 54 | 8 | 0 | -1.391226 | 0.270776  | -0.729997 |
| 55 | 6 | 0 | 1.712939  | -1.117539 | 0.831415  |
| 56 | 1 | 0 | 2.396476  | -0.421834 | 1.298755  |
| 57 | 6 | 0 | 2.429491  | -1.960874 | -0.051851 |
| 58 | 8 | 0 | 2.197486  | -3.138239 | -0.364198 |
| 59 | 8 | 0 | 3.496515  | -1.317825 | -0.611666 |
| 60 | 6 | 0 | 4.236415  | -2.091082 | -1.552363 |
| 61 | 1 | 0 | 5.109609  | -1.495152 | -1.819143 |
| 62 | 1 | 0 | 4.545469  | -3.039338 | -1.107046 |
| 63 | 1 | 0 | 3.638823  | -2.301360 | -2.445796 |
| 64 | 6 | 0 | 0.886728  | -1.858179 | 1.702122  |
| 65 | 8 | 0 | 0.367886  | -2.959676 | 1.521851  |
| 66 | 8 | 0 | 0.616195  | -1.147530 | 2.842277  |
| 67 | 6 | 0 | -0.153318 | -1.832757 | 3.825651  |
| 68 | 1 | 0 | -0.381514 | -1.094048 | 4.595583  |
| 69 | 1 | 0 | -1.068516 | -2.238905 | 3.396693  |
| 70 | 1 | 0 | 0.428650  | -2.650385 | 4.265049  |

---

**Table S4**

|                                         | Gsol         | Thermal<br>correction to<br>Gibbs Free<br>Energy (TCG) | Esol         | $\Delta$ Gsol=Esol+TCG | $N_{\text{imag}}$ |
|-----------------------------------------|--------------|--------------------------------------------------------|--------------|------------------------|-------------------|
| <b>8a</b>                               | -518.444088  | 0.18331                                                | -518.7723446 | -518.5890346           | 0                 |
| <b>TEMPOBF<sub>4</sub></b>              | -907.564217  | 0.238674                                               | -908.0995694 | -907.8608954           | 0                 |
| <b>TS1B</b>                             | -1425.968    | 0.438133                                               | -1426.844874 | -1426.406741           | -1439.66          |
| <b>IM1B</b>                             | -942.168961  | 0.179246                                               | -942.646842  | -942.467596            | 0                 |
| <b>TEMPOH</b>                           | -483.861261  | 0.241587                                               | -484.2491599 | -484.0075729           | 0                 |
| <b>TEMPOH<sub>2</sub>BF<sub>4</sub></b> | -908.794307  | 0.26409                                                | -909.3592486 | -909.0951586           | 0                 |
| <b>IM2B</b>                             | -517.260351  | 0.15879                                                | -517.5625698 | -517.4037798           | 0                 |
| <b>TS2B</b>                             | -1424.800746 | 0.422584                                               | -1425.655158 | -1425.232574           | -359.85           |
| <b>IM3B</b>                             | -1424.842128 | 0.424884                                               | -1425.696686 | -1425.271802           | 0                 |
| <b>TS3B</b>                             | -1424.788530 | 0.420778                                               | -1425.6423   | -1425.221522           | -1829.88          |
| <b>H<sub>2</sub>O</b>                   | -76.378136   | 0.003586                                               | -76.42967634 | -76.42609034           | 0                 |
| <b>TS3B'</b>                            | -1501.184865 | 0.440176                                               | -1502.107236 | -1501.66706            | -1651.17          |
| <b>IM4B</b>                             | -1424.853944 | 0.426031                                               | -1425.710099 | -1425.284068           | 0                 |
| <b>TS4B</b>                             | -1424.84601  | 0.422463                                               | -1425.699917 | -1425.277454           | -472.42           |
| <b>IM5B</b>                             | -1016.198939 | 0.160879                                               | -1016.680966 | -1016.520087           | 0                 |
| <b>TEMPH</b>                            | -408.720732  | 0.239072                                               | -409.0789717 | -408.8398997           | 0                 |
| <b>CH<sub>2</sub>(COMe)<sub>2</sub></b> | -345.556812  | 0.092316                                               | -345.762425  | -345.670109            | 0                 |
| <b>TS5B</b>                             | -1178.742368 | 0.355179                                               | -1179.487127 | -1179.131948           | -619.25           |
| <b>TEMPH<sub>2</sub>BF<sub>4</sub></b>  | -833.660814  | 0.261032                                               | -834.1973714 | -833.9363394           | 0                 |
| <b>IM6B</b>                             | -345.070962  | 0.077536                                               | -345.2749306 | -345.1973946           | 0                 |
| <b>IM7B</b>                             | -591.718895  | 0.153282                                               | -592.0322447 | -591.8789627           | 0                 |
| <b>TS6B</b>                             | -936.799902  | 0.253792                                               | -937.3299883 | -937.0761963           | -65.45            |
| <b>9a''</b>                             | -936.857865  | 0.256417                                               | -937.3869978 | -937.1305808           | 0                 |
| <b>TS7B</b>                             | -1345.441902 | 0.516095                                               | -1346.345309 | -1345.829214           | -100.02           |
| <b>9a</b>                               | -1345.497156 | 0.522603                                               | -1346.400619 | -1345.878016           | 0                 |

**8a**Standard orientation:  
-----

| Center<br>Number | Atomic<br>Number | Atomic<br>Type | Coordinates (Angstroms) |           |           |
|------------------|------------------|----------------|-------------------------|-----------|-----------|
|                  |                  |                | X                       | Y         | Z         |
| 1                | 6                | 0              | -2.659525               | -0.982120 | 0.670825  |
| 2                | 6                | 0              | -1.313932               | -1.236292 | 0.007905  |
| 3                | 6                | 0              | -1.313940               | 1.236286  | -0.007944 |
| 4                | 6                | 0              | -2.659575               | 0.982117  | -0.670779 |
| 5                | 1                | 0              | -0.787779               | -1.994656 | 0.596643  |
| 6                | 1                | 0              | -1.458679               | -1.639924 | -1.005635 |
| 7                | 1                | 0              | -2.486959               | -0.675215 | 1.712462  |
| 8                | 1                | 0              | -1.458622               | 1.639894  | 1.005616  |
| 9                | 1                | 0              | -0.787833               | 1.994667  | -0.596699 |
| 10               | 1                | 0              | -2.487075               | 0.675231  | -1.712433 |
| 11               | 1                | 0              | -3.246859               | 1.904680  | -0.680301 |
| 12               | 1                | 0              | -3.246802               | -1.904686 | 0.680402  |
| 13               | 7                | 0              | -0.545529               | 0.000000  | -0.000063 |
| 14               | 6                | 0              | 0.831399                | 0.000004  | -0.000030 |
| 15               | 6                | 0              | 1.561419                | -1.175920 | -0.278684 |
| 16               | 6                | 0              | 1.561407                | 1.175928  | 0.278655  |
| 17               | 6                | 0              | 2.951848                | -1.166252 | -0.272153 |
| 18               | 1                | 0              | 1.039999                | -2.094440 | -0.525021 |
| 19               | 6                | 0              | 2.951837                | 1.166259  | 0.272181  |
| 20               | 1                | 0              | 1.039980                | 2.094449  | 0.524970  |
| 21               | 6                | 0              | 3.665567                | 0.000004  | 0.000029  |
| 22               | 1                | 0              | 3.482196                | -2.088261 | -0.495383 |
| 23               | 1                | 0              | 3.482178                | 2.088268  | 0.495434  |
| 24               | 1                | 0              | 4.750744                | 0.000003  | 0.000052  |



25            8            0            -3.434351    -0.000012    0.000038

---

**TS1B**

Standard orientation:

---

| Center<br>Number | Atomic<br>Number | Atomic<br>Type | Coordinates (Angstroms) |           |           |
|------------------|------------------|----------------|-------------------------|-----------|-----------|
|                  |                  |                | X                       | Y         | Z         |
| 1                | 6                | 0              | 0.385660                | 3.742250  | 0.696225  |
| 2                | 6                | 0              | 0.955167                | 2.399053  | 1.175913  |
| 3                | 6                | 0              | 0.347639                | 1.693422  | -1.289787 |
| 4                | 6                | 0              | -0.772135               | 2.769093  | -1.326096 |
| 5                | 6                | 0              | -0.947490               | 3.551694  | -0.018631 |
| 6                | 1                | 0              | -1.638956               | 3.019167  | 0.645257  |
| 7                | 1                | 0              | 1.100853                | 4.237313  | 0.029269  |
| 8                | 1                | 0              | -1.720056               | 2.287877  | -1.589672 |
| 9                | 1                | 0              | -0.529733               | 3.460283  | -2.140461 |
| 10               | 1                | 0              | -1.406399               | 4.521464  | -0.232083 |
| 11               | 1                | 0              | 0.274929                | 4.385161  | 1.575305  |
| 12               | 7                | 0              | 0.713955                | 1.386082  | 0.117654  |
| 13               | 6                | 0              | -0.124681               | 0.406895  | -1.962794 |
| 14               | 1                | 0              | 0.676254                | -0.333694 | -2.008809 |
| 15               | 1                | 0              | -0.987952               | -0.016348 | -1.438828 |
| 16               | 1                | 0              | -0.439887               | 0.659266  | -2.979712 |
| 17               | 6                | 0              | 1.627849                | 2.178058  | -1.995382 |
| 18               | 1                | 0              | 2.418984                | 1.434289  | -1.867747 |
| 19               | 1                | 0              | 1.415771                | 2.305102  | -3.062057 |
| 20               | 1                | 0              | 1.974072                | 3.137546  | -1.601568 |
| 21               | 6                | 0              | 0.245886                | 1.933285  | 2.454376  |
| 22               | 1                | 0              | 0.620461                | 0.957805  | 2.778250  |

|    |   |   |           |           |           |
|----|---|---|-----------|-----------|-----------|
| 23 | 1 | 0 | 0.453193  | 2.656757  | 3.247876  |
| 24 | 1 | 0 | -0.838739 | 1.871562  | 2.321004  |
| 25 | 6 | 0 | 2.463092  | 2.487342  | 1.433213  |
| 26 | 1 | 0 | 2.645681  | 3.222424  | 2.223854  |
| 27 | 1 | 0 | 2.854832  | 1.517042  | 1.747499  |
| 28 | 1 | 0 | 2.995001  | 2.802714  | 0.531336  |
| 29 | 8 | 0 | 0.976523  | 0.180276  | 0.422628  |
| 30 | 9 | 0 | 2.903937  | -1.867411 | 0.571843  |
| 31 | 9 | 0 | 3.639655  | 0.135574  | -0.280783 |
| 32 | 9 | 0 | 4.712242  | -1.810057 | -0.824024 |
| 33 | 9 | 0 | 2.626119  | -1.395292 | -1.655668 |
| 34 | 5 | 0 | 3.468525  | -1.230951 | -0.541518 |
| 35 | 6 | 0 | 0.173805  | -2.328380 | 1.957378  |
| 36 | 6 | 0 | -0.823305 | -1.327714 | 1.383755  |
| 37 | 6 | 0 | -1.278665 | -2.855315 | -0.467383 |
| 38 | 6 | 0 | 0.175539  | -3.195181 | -0.203769 |
| 39 | 1 | 0 | -1.268916 | -0.665861 | 2.129289  |
| 40 | 1 | 0 | 0.008461  | -0.440971 | 0.837704  |
| 41 | 1 | 0 | -0.198958 | -2.641815 | 2.938982  |
| 42 | 1 | 0 | -1.902450 | -3.731416 | -0.261286 |
| 43 | 1 | 0 | -1.435297 | -2.544393 | -1.505521 |
| 44 | 1 | 0 | 0.847985  | -2.380042 | -0.500271 |
| 45 | 1 | 0 | 0.445977  | -4.095321 | -0.759542 |
| 46 | 1 | 0 | 1.140752  | -1.828054 | 2.094418  |
| 47 | 7 | 0 | -1.686602 | -1.753231 | 0.419951  |
| 48 | 6 | 0 | -2.871801 | -1.042512 | 0.120022  |
| 49 | 6 | 0 | -2.993960 | 0.314307  | 0.447795  |
| 50 | 6 | 0 | -3.923877 | -1.694184 | -0.534084 |
| 51 | 6 | 0 | -4.167019 | 0.998363  | 0.151994  |
| 52 | 1 | 0 | -2.157994 | 0.845391  | 0.894555  |

|    |   |   |           |           |           |
|----|---|---|-----------|-----------|-----------|
| 53 | 6 | 0 | -5.091320 | -0.995778 | -0.828156 |
| 54 | 1 | 0 | -3.842857 | -2.743201 | -0.796886 |
| 55 | 6 | 0 | -5.223438 | 0.347933  | -0.484935 |
| 56 | 1 | 0 | -4.243377 | 2.052027  | 0.404214  |
| 57 | 1 | 0 | -5.904051 | -1.513334 | -1.328169 |
| 58 | 1 | 0 | -6.134931 | 0.886957  | -0.722109 |
| 59 | 8 | 0 | 0.318975  | -3.488025 | 1.174875  |

-----

### IM1B

Standard orientation:

-----

| Center<br>Number | Atomic<br>Number | Atomic<br>Type | Coordinates (Angstroms) |           |           |
|------------------|------------------|----------------|-------------------------|-----------|-----------|
|                  |                  |                | X                       | Y         | Z         |
| 1                | 6                | 0              | -1.506214               | 1.880320  | -0.738975 |
| 2                | 6                | 0              | -0.420985               | 0.857123  | -0.867840 |
| 3                | 6                | 0              | 0.403425                | 1.899153  | 1.071118  |
| 4                | 6                | 0              | -0.001919               | 3.261463  | 0.507906  |
| 5                | 1                | 0              | -0.384684               | 0.111248  | -1.656207 |
| 6                | 1                | 0              | -2.147786               | 1.600385  | 0.108055  |
| 7                | 1                | 0              | -0.371388               | 1.487502  | 1.725354  |
| 8                | 1                | 0              | 1.340392                | 1.963715  | 1.621185  |
| 9                | 1                | 0              | 0.879860                | 3.784877  | 0.128264  |
| 10               | 1                | 0              | -0.443088               | 3.848335  | 1.320848  |
| 11               | 1                | 0              | -2.109357               | 1.907745  | -1.645103 |
| 12               | 7                | 0              | 0.547552                | 0.923773  | -0.026474 |
| 13               | 6                | 0              | 1.660607                | 0.008250  | -0.042401 |
| 14               | 6                | 0              | 2.951527                | 0.524906  | 0.030617  |
| 15               | 6                | 0              | 1.410641                | -1.357596 | -0.125764 |
| 16               | 6                | 0              | 4.024669                | -0.358929 | -0.000241 |

|    |   |   |           |           |           |
|----|---|---|-----------|-----------|-----------|
| 17 | 1 | 0 | 3.111245  | 1.597616  | 0.091601  |
| 18 | 6 | 0 | 2.498826  | -2.227287 | -0.156996 |
| 19 | 1 | 0 | 0.391166  | -1.732058 | -0.144754 |
| 20 | 6 | 0 | 3.799451  | -1.732479 | -0.095342 |
| 21 | 1 | 0 | 5.037413  | 0.027762  | 0.045779  |
| 22 | 1 | 0 | 2.323196  | -3.296434 | -0.218386 |
| 23 | 1 | 0 | 4.641072  | -2.417601 | -0.116269 |
| 24 | 9 | 0 | -1.591643 | -0.653161 | 1.034951  |
| 25 | 9 | 0 | -2.699052 | -0.595762 | -0.961496 |
| 26 | 9 | 0 | -3.561761 | -1.795241 | 0.791190  |
| 27 | 9 | 0 | -1.672025 | -2.523635 | -0.278090 |
| 28 | 5 | 0 | -2.392542 | -1.401966 | 0.149989  |
| 29 | 8 | 0 | -0.917254 | 3.155123  | -0.574560 |

-----

## IM2B

Standard orientation:

-----

| Center<br>Number | Atomic<br>Number | Atomic<br>Type | Coordinates (Angstroms) |           |           |
|------------------|------------------|----------------|-------------------------|-----------|-----------|
|                  |                  |                | X                       | Y         | Z         |
| 1                | 6                | 0              | -2.693604               | 1.144246  | -0.336301 |
| 2                | 6                | 0              | -1.355590               | 1.143461  | -0.403665 |
| 3                | 6                | 0              | -1.382199               | -1.231294 | -0.080834 |
| 4                | 6                | 0              | -2.666167               | -0.935406 | 0.691664  |
| 5                | 1                | 0              | -0.827338               | 2.029984  | -0.730693 |
| 6                | 1                | 0              | -1.629971               | -1.613511 | -1.080212 |
| 7                | 1                | 0              | -0.820087               | -1.995702 | 0.459448  |
| 8                | 1                | 0              | -2.407942               | -0.602310 | 1.705115  |
| 9                | 1                | 0              | -3.292691               | -1.826922 | 0.752678  |
| 10               | 1                | 0              | -3.290726               | 2.005797  | -0.607668 |

|    |   |   |           |           |           |
|----|---|---|-----------|-----------|-----------|
| 11 | 7 | 0 | -0.601254 | -0.009267 | -0.165021 |
| 12 | 6 | 0 | 0.785844  | 0.005336  | -0.070547 |
| 13 | 6 | 0 | 1.535322  | -1.159360 | -0.316870 |
| 14 | 6 | 0 | 1.475411  | 1.184011  | 0.270272  |
| 15 | 6 | 0 | 2.922790  | -1.139092 | -0.217316 |
| 16 | 1 | 0 | 1.035582  | -2.076426 | -0.610511 |
| 17 | 6 | 0 | 2.863589  | 1.190729  | 0.348480  |
| 18 | 1 | 0 | 0.922812  | 2.087733  | 0.504481  |
| 19 | 6 | 0 | 3.602626  | 0.032780  | 0.109678  |
| 20 | 1 | 0 | 3.476493  | -2.052825 | -0.414619 |
| 21 | 1 | 0 | 3.370000  | 2.113720  | 0.617122  |
| 22 | 1 | 0 | 4.685510  | 0.043388  | 0.179351  |
| 23 | 8 | 0 | -3.442625 | 0.067433  | 0.051661  |

-----

**TS2B**

Standard orientation:

-----

| Center<br>Number | Atomic<br>Number | Atomic<br>Type | Coordinates (Angstroms) |           |           |
|------------------|------------------|----------------|-------------------------|-----------|-----------|
|                  |                  |                | X                       | Y         | Z         |
| 1                | 6                | 0              | 0.213979                | 0.100143  | 1.491305  |
| 2                | 6                | 0              | 1.308454                | 0.327453  | 0.641193  |
| 3                | 6                | 0              | 2.506808                | -1.268939 | 1.933399  |
| 4                | 1                | 0              | 1.246366                | 1.057017  | -0.159287 |
| 5                | 1                | 0              | 1.991992                | -2.186216 | 1.617271  |
| 6                | 1                | 0              | 3.543247                | -1.490315 | 2.174878  |
| 7                | 1                | 0              | -0.580251               | 0.830256  | 1.409053  |
| 8                | 7                | 0              | 2.456342                | -0.320762 | 0.797103  |
| 9                | 6                | 0              | 3.580520                | -0.118400 | -0.056217 |
| 10               | 6                | 0              | 4.868609                | -0.075493 | 0.484480  |

|    |   |   |           |           |           |
|----|---|---|-----------|-----------|-----------|
| 11 | 6 | 0 | 3.387012  | 0.059547  | -1.428608 |
| 12 | 6 | 0 | 5.957357  | 0.137498  | -0.354948 |
| 13 | 1 | 0 | 5.024122  | -0.175511 | 1.553380  |
| 14 | 6 | 0 | 4.483986  | 0.282697  | -2.254695 |
| 15 | 1 | 0 | 2.387901  | 0.013036  | -1.849536 |
| 16 | 6 | 0 | 5.771911  | 0.316393  | -1.724524 |
| 17 | 1 | 0 | 6.955030  | 0.174784  | 0.070881  |
| 18 | 1 | 0 | 4.326784  | 0.417503  | -3.320186 |
| 19 | 1 | 0 | 6.625535  | 0.482308  | -2.373834 |
| 20 | 6 | 0 | -2.641053 | -1.212645 | -2.288101 |
| 21 | 6 | 0 | -1.439208 | -1.669301 | -1.444698 |
| 22 | 6 | 0 | -3.063696 | -1.041489 | 0.519777  |
| 23 | 6 | 0 | -3.786518 | -0.012559 | -0.387803 |
| 24 | 6 | 0 | -3.176609 | 0.123621  | -1.788339 |
| 25 | 1 | 0 | -2.363816 | 0.854502  | -1.756834 |
| 26 | 1 | 0 | -3.432122 | -1.970646 | -2.268367 |
| 27 | 1 | 0 | -3.772533 | 0.967297  | 0.098774  |
| 28 | 1 | 0 | -4.834292 | -0.324380 | -0.462283 |
| 29 | 1 | 0 | -3.929774 | 0.517319  | -2.477663 |
| 30 | 1 | 0 | -2.302439 | -1.139717 | -3.326520 |
| 31 | 7 | 0 | -1.693346 | -1.311198 | -0.015641 |
| 32 | 6 | 0 | -2.969590 | -0.511006 | 1.947904  |
| 33 | 1 | 0 | -2.451572 | -1.209359 | 2.610681  |
| 34 | 1 | 0 | -2.487487 | 0.467002  | 1.984516  |
| 35 | 1 | 0 | -3.993567 | -0.386716 | 2.313556  |
| 36 | 6 | 0 | -3.808033 | -2.389744 | 0.556351  |
| 37 | 1 | 0 | -3.238041 | -3.120500 | 1.139592  |
| 38 | 1 | 0 | -4.777677 | -2.235826 | 1.040457  |
| 39 | 1 | 0 | -3.992451 | -2.797444 | -0.439648 |
| 40 | 6 | 0 | -0.164182 | -0.951883 | -1.887191 |

|    |   |   |           |           |           |
|----|---|---|-----------|-----------|-----------|
| 41 | 1 | 0 | 0.695844  | -1.323970 | -1.323310 |
| 42 | 1 | 0 | 0.005535  | -1.168379 | -2.945822 |
| 43 | 1 | 0 | -0.241485 | 0.131052  | -1.754047 |
| 44 | 6 | 0 | -1.224464 | -3.183789 | -1.537805 |
| 45 | 1 | 0 | -0.991535 | -3.444752 | -2.575496 |
| 46 | 1 | 0 | -0.384815 | -3.489231 | -0.905757 |
| 47 | 1 | 0 | -2.117484 | -3.736824 | -1.235363 |
| 48 | 8 | 0 | -0.734872 | -1.438662 | 0.787594  |
| 49 | 5 | 0 | -1.591414 | 3.014120  | -0.030484 |
| 50 | 9 | 0 | -0.701194 | 2.083976  | -0.612523 |
| 51 | 9 | 0 | -1.911890 | 2.579071  | 1.267826  |
| 52 | 9 | 0 | -2.754397 | 3.081708  | -0.799839 |
| 53 | 9 | 0 | -0.979758 | 4.264015  | 0.029827  |
| 54 | 6 | 0 | 1.903572  | -0.692648 | 3.042531  |
| 55 | 1 | 0 | 2.034643  | -1.316250 | 3.902090  |
| 56 | 1 | 0 | 2.391059  | 0.245877  | 3.205099  |
| 57 | 8 | 0 | 0.503796  | -0.521894 | 2.835432  |

-----

### IM3B

Standard orientation:

-----

| Center<br>Number | Atomic<br>Number | Atomic<br>Type | Coordinates (Angstroms) |           |           |
|------------------|------------------|----------------|-------------------------|-----------|-----------|
|                  |                  |                | X                       | Y         | Z         |
| 1                | 6                | 0              | -0.079589               | -0.180700 | -1.279503 |
| 2                | 6                | 0              | -1.353401               | 0.327643  | -0.630460 |
| 3                | 6                | 0              | -2.200743               | -1.791589 | -1.230229 |
| 4                | 6                | 0              | -1.504111               | -1.615889 | -2.573990 |
| 5                | 1                | 0              | -1.428259               | 1.327667  | -0.213118 |
| 6                | 1                | 0              | -1.612062               | -2.394528 | -0.535619 |

|    |   |   |           |           |           |
|----|---|---|-----------|-----------|-----------|
| 7  | 1 | 0 | -3.181006 | -2.245119 | -1.364052 |
| 8  | 1 | 0 | -2.209814 | -1.212459 | -3.305776 |
| 9  | 1 | 0 | -1.153921 | -2.593278 | -2.913798 |
| 10 | 1 | 0 | 0.625321  | 0.636275  | -1.421765 |
| 11 | 7 | 0 | -2.366377 | -0.460062 | -0.603081 |
| 12 | 6 | 0 | -3.601003 | -0.108217 | 0.052564  |
| 13 | 6 | 0 | -4.806526 | -0.310565 | -0.613759 |
| 14 | 6 | 0 | -3.544573 | 0.428226  | 1.335161  |
| 15 | 6 | 0 | -5.986897 | 0.048903  | 0.028078  |
| 16 | 1 | 0 | -4.821874 | -0.716723 | -1.620428 |
| 17 | 6 | 0 | -4.735773 | 0.779897  | 1.963735  |
| 18 | 1 | 0 | -2.588082 | 0.545113  | 1.836802  |
| 19 | 6 | 0 | -5.952984 | 0.591010  | 1.312894  |
| 20 | 1 | 0 | -6.934526 | -0.092390 | -0.480970 |
| 21 | 1 | 0 | -4.708480 | 1.191521  | 2.967162  |
| 22 | 1 | 0 | -6.879176 | 0.863030  | 1.808963  |
| 23 | 6 | 0 | 2.791503  | -1.005183 | 2.395750  |
| 24 | 6 | 0 | 1.420090  | -0.901091 | 1.698599  |
| 25 | 6 | 0 | 2.811681  | -1.442707 | -0.386818 |
| 26 | 6 | 0 | 4.092651  | -0.850875 | 0.262110  |
| 27 | 6 | 0 | 3.853411  | -0.218729 | 1.638466  |
| 28 | 1 | 0 | 3.520517  | 0.816675  | 1.513700  |
| 29 | 1 | 0 | 3.097609  | -2.055709 | 2.472026  |
| 30 | 1 | 0 | 4.522572  | -0.099592 | -0.409285 |
| 31 | 1 | 0 | 4.827225  | -1.660605 | 0.344864  |
| 32 | 1 | 0 | 4.790242  | -0.191646 | 2.204264  |
| 33 | 1 | 0 | 2.677175  | -0.636176 | 3.421050  |
| 34 | 7 | 0 | 1.655459  | -0.732945 | 0.228579  |
| 35 | 6 | 0 | 2.823350  | -1.103591 | -1.880124 |
| 36 | 1 | 0 | 1.990727  | -1.575705 | -2.409508 |



|    |   |   |           |           |           |
|----|---|---|-----------|-----------|-----------|
| 37 | 1 | 0 | 2.768660  | -0.019956 | -2.024060 |
| 38 | 1 | 0 | 3.759149  | -1.464529 | -2.319837 |
| 39 | 6 | 0 | 2.754910  | -2.971236 | -0.246205 |
| 40 | 1 | 0 | 1.788587  | -3.351579 | -0.593717 |
| 41 | 1 | 0 | 3.538168  | -3.417587 | -0.868855 |
| 42 | 1 | 0 | 2.918659  | -3.309146 | 0.780024  |
| 43 | 6 | 0 | 0.706888  | 0.369195  | 2.170138  |
| 44 | 1 | 0 | -0.239857 | 0.502889  | 1.634583  |
| 45 | 1 | 0 | 0.474655  | 0.295143  | 3.238250  |
| 46 | 1 | 0 | 1.318891  | 1.257141  | 1.992153  |
| 47 | 6 | 0 | 0.550592  | -2.110020 | 2.066351  |
| 48 | 1 | 0 | 0.540314  | -2.210632 | 3.157407  |
| 49 | 1 | 0 | -0.482198 | -1.973085 | 1.730917  |
| 50 | 1 | 0 | 0.931666  | -3.042986 | 1.644882  |
| 51 | 8 | 0 | 0.467441  | -1.170417 | -0.433665 |
| 52 | 5 | 0 | 1.671334  | 2.997407  | -0.498818 |
| 53 | 9 | 0 | 0.371991  | 2.581361  | -0.147259 |
| 54 | 9 | 0 | 2.105361  | 2.247403  | -1.604710 |
| 55 | 9 | 0 | 2.534591  | 2.785753  | 0.583325  |
| 56 | 9 | 0 | 1.646767  | 4.350511  | -0.831260 |
| 57 | 8 | 0 | -0.391986 | -0.717099 | -2.522343 |

-----

**TS3B**

Standard orientation:

-----

| Center | Atomic | Atomic | Coordinates (Angstroms) |           |          |
|--------|--------|--------|-------------------------|-----------|----------|
| Number | Number | Type   | X                       | Y         | Z        |
| 1      | 6      | 0      | 0.465279                | 0.167058  | 0.813528 |
| 2      | 6      | 0      | -0.751959               | -0.273009 | 0.231692 |

-----

|    |   |   |           |           |           |
|----|---|---|-----------|-----------|-----------|
| 3  | 6 | 0 | -1.963286 | 0.405715  | 2.180414  |
| 4  | 6 | 0 | -0.598872 | 0.385055  | 2.852112  |
| 5  | 1 | 0 | -0.744221 | -0.700977 | -0.762237 |
| 6  | 1 | 0 | -2.271873 | 1.426076  | 1.942420  |
| 7  | 1 | 0 | -2.709427 | -0.064597 | 2.820072  |
| 8  | 1 | 0 | -0.342037 | -0.641987 | 3.145187  |
| 9  | 1 | 0 | -0.605971 | 1.020765  | 3.738283  |
| 10 | 1 | 0 | 1.482572  | -0.883443 | 0.811809  |
| 11 | 7 | 0 | -1.877793 | -0.333422 | 0.908736  |
| 12 | 6 | 0 | -3.029824 | -1.014179 | 0.392548  |
| 13 | 6 | 0 | -3.751806 | -1.865254 | 1.228696  |
| 14 | 6 | 0 | -3.398908 | -0.834589 | -0.940218 |
| 15 | 6 | 0 | -4.854501 | -2.545441 | 0.719776  |
| 16 | 1 | 0 | -3.446413 | -2.012615 | 2.259965  |
| 17 | 6 | 0 | -4.497084 | -1.530074 | -1.438437 |
| 18 | 1 | 0 | -2.843366 | -0.137967 | -1.558845 |
| 19 | 6 | 0 | -5.228297 | -2.382294 | -0.613008 |
| 20 | 1 | 0 | -5.414983 | -3.212198 | 1.367479  |
| 21 | 1 | 0 | -4.789569 | -1.390904 | -2.474575 |
| 22 | 1 | 0 | -6.088350 | -2.915477 | -1.005831 |
| 23 | 6 | 0 | 4.070796  | -1.540100 | -1.475996 |
| 24 | 6 | 0 | 2.625818  | -1.025489 | -1.335734 |
| 25 | 6 | 0 | 3.683176  | 0.220190  | 0.686375  |
| 26 | 6 | 0 | 4.709968  | -0.924458 | 0.871947  |
| 27 | 6 | 0 | 4.605824  | -2.061135 | -0.150697 |
| 28 | 1 | 0 | 3.937225  | -2.842237 | 0.228444  |
| 29 | 1 | 0 | 4.724359  | -0.752984 | -1.864604 |
| 30 | 1 | 0 | 4.604743  | -1.332586 | 1.881948  |
| 31 | 1 | 0 | 5.700400  | -0.459411 | 0.820014  |
| 32 | 1 | 0 | 5.584965  | -2.527793 | -0.290360 |

|    |   |   |           |           |           |
|----|---|---|-----------|-----------|-----------|
| 33 | 1 | 0 | 4.053872  | -2.333265 | -2.230255 |
| 34 | 7 | 0 | 2.452642  | -0.352186 | 0.026924  |
| 35 | 6 | 0 | 3.305554  | 0.752791  | 2.067640  |
| 36 | 1 | 0 | 2.688188  | 1.649631  | 2.005586  |
| 37 | 1 | 0 | 2.769528  | -0.003010 | 2.650461  |
| 38 | 1 | 0 | 4.234549  | 0.998631  | 2.592014  |
| 39 | 6 | 0 | 4.242481  | 1.387709  | -0.136534 |
| 40 | 1 | 0 | 3.459274  | 2.124295  | -0.337613 |
| 41 | 1 | 0 | 5.022497  | 1.875810  | 0.456502  |
| 42 | 1 | 0 | 4.690762  | 1.077528  | -1.081294 |
| 43 | 6 | 0 | 1.677154  | -2.227430 | -1.379334 |
| 44 | 1 | 0 | 0.630754  | -1.931473 | -1.307373 |
| 45 | 1 | 0 | 1.806313  | -2.739414 | -2.337246 |
| 46 | 1 | 0 | 1.890946  | -2.937661 | -0.574887 |
| 47 | 6 | 0 | 2.287316  | -0.062401 | -2.473235 |
| 48 | 1 | 0 | 2.496480  | -0.578932 | -3.415723 |
| 49 | 1 | 0 | 1.233112  | 0.223126  | -2.461054 |
| 50 | 1 | 0 | 2.896922  | 0.843860  | -2.439395 |
| 51 | 8 | 0 | 1.433402  | 0.668520  | -0.062125 |
| 52 | 5 | 0 | -1.827135 | 2.475183  | -0.902038 |
| 53 | 9 | 0 | -1.929372 | 3.699391  | -1.565575 |
| 54 | 9 | 0 | -0.913388 | 2.575067  | 0.150894  |
| 55 | 9 | 0 | -1.381832 | 1.490832  | -1.811027 |
| 56 | 9 | 0 | -3.078581 | 2.101942  | -0.394188 |
| 57 | 8 | 0 | 0.391107  | 0.904164  | 1.981067  |

-----

## H<sub>2</sub>O

Standard orientation:

-----

| Center | Atomic | Atomic | Coordinates (Angstroms) |  |  |
|--------|--------|--------|-------------------------|--|--|
|--------|--------|--------|-------------------------|--|--|

| Number | Number | Type | X         | Y         | Z         |
|--------|--------|------|-----------|-----------|-----------|
| 1      | 8      | 0    | 0.000000  | 0.000000  | 0.110812  |
| 2      | 1      | 0    | -0.000000 | 0.783976  | -0.443248 |
| 3      | 1      | 0    | -0.000000 | -0.783976 | -0.443248 |

### TS3B'

Standard orientation:

| Center<br>Number | Atomic<br>Number | Atomic<br>Type | Coordinates (Angstroms) |           |           |
|------------------|------------------|----------------|-------------------------|-----------|-----------|
|                  |                  |                | X                       | Y         | Z         |
| 1                | 6                | 0              | -0.428260               | -1.343848 | -0.204201 |
| 2                | 6                | 0              | 0.906084                | -0.861747 | -0.195512 |
| 3                | 6                | 0              | 1.740415                | -3.097175 | -0.541922 |
| 4                | 6                | 0              | 0.350421                | -3.517602 | -0.089761 |
| 5                | 1                | 0              | 1.091289                | 0.195111  | -0.017499 |
| 6                | 1                | 0              | 1.856987                | -3.225944 | -1.621450 |
| 7                | 1                | 0              | 2.499331                | -3.689533 | -0.031441 |
| 8                | 1                | 0              | 0.291708                | -3.502810 | 1.007188  |
| 9                | 1                | 0              | 0.130987                | -4.524900 | -0.445082 |
| 10               | 1                | 0              | -0.757114               | -1.385734 | 1.146772  |
| 11               | 7                | 0              | 1.945990                | -1.670169 | -0.224939 |
| 12               | 6                | 0              | 3.278513                | -1.169775 | -0.032616 |
| 13               | 6                | 0              | 4.166774                | -1.858556 | 0.793095  |
| 14               | 6                | 0              | 3.660661                | 0.010954  | -0.666549 |
| 15               | 6                | 0              | 5.449304                | -1.352393 | 0.982869  |
| 16               | 1                | 0              | 3.858160                | -2.765349 | 1.303318  |
| 17               | 6                | 0              | 4.940616                | 0.515599  | -0.454753 |
| 18               | 1                | 0              | 2.960149                | 0.533828  | -1.309649 |

|    |   |   |           |           |           |
|----|---|---|-----------|-----------|-----------|
| 19 | 6 | 0 | 5.839227  | -0.166314 | 0.362420  |
| 20 | 1 | 0 | 6.140660  | -1.883984 | 1.629048  |
| 21 | 1 | 0 | 5.230592  | 1.442994  | -0.938180 |
| 22 | 1 | 0 | 6.839646  | 0.225035  | 0.518092  |
| 23 | 6 | 0 | -3.850069 | 1.810377  | 0.737955  |
| 24 | 6 | 0 | -2.441760 | 1.355130  | 0.305451  |
| 25 | 6 | 0 | -3.754868 | -0.710095 | -0.555658 |
| 26 | 6 | 0 | -4.883353 | -0.462189 | 0.482437  |
| 27 | 6 | 0 | -4.602475 | 0.693944  | 1.450832  |
| 28 | 1 | 0 | -4.009133 | 0.336303  | 2.302343  |
| 29 | 1 | 0 | -4.424640 | 2.143163  | -0.133676 |
| 30 | 1 | 0 | -5.053727 | -1.381427 | 1.052894  |
| 31 | 1 | 0 | -5.800980 | -0.261298 | -0.081073 |
| 32 | 1 | 0 | -5.544283 | 1.067031  | 1.862996  |
| 33 | 1 | 0 | -3.727715 | 2.683196  | 1.387519  |
| 34 | 7 | 0 | -2.494700 | -0.147973 | 0.055876  |
| 35 | 6 | 0 | -3.574100 | -2.215497 | -0.743796 |
| 36 | 1 | 0 | -2.872164 | -2.441341 | -1.547772 |
| 37 | 1 | 0 | -3.220394 | -2.699403 | 0.172091  |
| 38 | 1 | 0 | -4.550508 | -2.641150 | -0.995045 |
| 39 | 6 | 0 | -4.075540 | -0.098445 | -1.921711 |
| 40 | 1 | 0 | -3.204557 | -0.144409 | -2.582246 |
| 41 | 1 | 0 | -4.876966 | -0.689650 | -2.376310 |
| 42 | 1 | 0 | -4.425730 | 0.933126  | -1.858728 |
| 43 | 6 | 0 | -1.454869 | 1.579089  | 1.455659  |
| 44 | 1 | 0 | -0.466923 | 1.164354  | 1.234333  |
| 45 | 1 | 0 | -1.326496 | 2.655904  | 1.599574  |
| 46 | 1 | 0 | -1.815637 | 1.144492  | 2.392608  |
| 47 | 6 | 0 | -1.962472 | 2.144413  | -0.912660 |
| 48 | 1 | 0 | -2.026160 | 3.207364  | -0.656373 |

|    |   |   |           |           |           |
|----|---|---|-----------|-----------|-----------|
| 49 | 1 | 0 | -0.923088 | 1.918168  | -1.153285 |
| 50 | 1 | 0 | -2.580945 | 1.975151  | -1.795107 |
| 51 | 8 | 0 | -1.365536 | -0.479416 | -0.776833 |
| 52 | 5 | 0 | 1.761984  | 2.789243  | -0.204002 |
| 53 | 9 | 0 | 0.844513  | 3.806607  | 0.059942  |
| 54 | 9 | 0 | 1.334526  | 2.052943  | -1.330541 |
| 55 | 9 | 0 | 1.827829  | 1.918088  | 0.899570  |
| 56 | 9 | 0 | 3.025194  | 3.322420  | -0.458245 |
| 57 | 8 | 0 | -0.628361 | -2.654893 | -0.647681 |
| 58 | 8 | 0 | -1.647086 | -1.363582 | 2.024059  |
| 59 | 1 | 0 | -1.989600 | -2.275095 | 2.100134  |
| 60 | 1 | 0 | -2.257892 | -0.785019 | 1.195090  |

-----

#### IM4B

Standard orientation:

-----

| Center | Atomic | Atomic | Coordinates (Angstroms) |           |           |
|--------|--------|--------|-------------------------|-----------|-----------|
| Number | Number | Type   | X                       | Y         | Z         |
| 1      | 6      | 0      | -0.013210               | -1.517952 | 0.175253  |
| 2      | 6      | 0      | -1.111373               | -0.854036 | 0.570757  |
| 3      | 6      | 0      | -2.420096               | -2.223468 | -0.914778 |
| 4      | 6      | 0      | -1.112853               | -2.306801 | -1.693620 |
| 5      | 1      | 0      | -1.066523               | -0.144334 | 1.382923  |
| 6      | 1      | 0      | -2.589528               | -3.159045 | -0.366397 |
| 7      | 1      | 0      | -3.241675               | -2.073953 | -1.618868 |
| 8      | 1      | 0      | -0.970642               | -1.394163 | -2.280784 |
| 9      | 1      | 0      | -1.107224               | -3.180053 | -2.345817 |
| 10     | 1      | 0      | 1.482199                | 0.322678  | -0.085941 |
| 11     | 7      | 0      | -2.347259               | -1.086959 | -0.008369 |

|    |   |   |           |           |           |
|----|---|---|-----------|-----------|-----------|
| 12 | 6 | 0 | -3.494506 | -0.385399 | 0.382490  |
| 13 | 6 | 0 | -4.760253 | -0.980088 | 0.264386  |
| 14 | 6 | 0 | -3.402027 | 0.919726  | 0.893388  |
| 15 | 6 | 0 | -5.901056 | -0.282343 | 0.651096  |
| 16 | 1 | 0 | -4.854730 | -1.994009 | -0.109761 |
| 17 | 6 | 0 | -4.550192 | 1.595520  | 1.291531  |
| 18 | 1 | 0 | -2.440228 | 1.418784  | 0.931653  |
| 19 | 6 | 0 | -5.808126 | 1.005261  | 1.174013  |
| 20 | 1 | 0 | -6.870328 | -0.762594 | 0.552212  |
| 21 | 1 | 0 | -4.457453 | 2.605939  | 1.679454  |
| 22 | 1 | 0 | -6.700288 | 1.542658  | 1.479060  |
| 23 | 6 | 0 | 3.785959  | 1.105251  | 1.584191  |
| 24 | 6 | 0 | 2.442230  | 0.387343  | 1.800427  |
| 25 | 6 | 0 | 3.186618  | -0.804806 | -0.440430 |
| 26 | 6 | 0 | 4.001828  | 0.455942  | -0.834432 |
| 27 | 6 | 0 | 3.934906  | 1.619694  | 0.160911  |
| 28 | 1 | 0 | 3.086250  | 2.265084  | -0.086844 |
| 29 | 1 | 0 | 4.615840  | 0.435991  | 1.832579  |
| 30 | 1 | 0 | 3.663270  | 0.800050  | -1.814786 |
| 31 | 1 | 0 | 5.036842  | 0.116608  | -0.947338 |
| 32 | 1 | 0 | 4.837314  | 2.230110  | 0.072098  |
| 33 | 1 | 0 | 3.817992  | 1.928098  | 2.304695  |
| 34 | 7 | 0 | 2.050818  | -0.338733 | 0.480163  |
| 35 | 6 | 0 | 2.568878  | -1.408557 | -1.698405 |
| 36 | 1 | 0 | 2.156513  | -2.399639 | -1.515223 |
| 37 | 1 | 0 | 1.788649  | -0.758604 | -2.108621 |
| 38 | 1 | 0 | 3.368993  | -1.492082 | -2.440152 |
| 39 | 6 | 0 | 4.026622  | -1.864850 | 0.266224  |
| 40 | 1 | 0 | 3.395660  | -2.669034 | 0.654784  |
| 41 | 1 | 0 | 4.698697  | -2.295030 | -0.482166 |

|    |   |   |           |           |           |
|----|---|---|-----------|-----------|-----------|
| 42 | 1 | 0 | 4.643576  | -1.464128 | 1.071740  |
| 43 | 6 | 0 | 1.331561  | 1.399756  | 2.069372  |
| 44 | 1 | 0 | 0.379804  | 0.903270  | 2.268962  |
| 45 | 1 | 0 | 1.599689  | 1.968022  | 2.964030  |
| 46 | 1 | 0 | 1.198772  | 2.097280  | 1.237557  |
| 47 | 6 | 0 | 2.537111  | -0.601339 | 2.957597  |
| 48 | 1 | 0 | 2.922705  | -0.039686 | 3.814312  |
| 49 | 1 | 0 | 1.561129  | -1.008765 | 3.225466  |
| 50 | 1 | 0 | 3.227311  | -1.422568 | 2.756094  |
| 51 | 8 | 0 | 1.185378  | -1.429677 | 0.847525  |
| 52 | 5 | 0 | -0.071424 | 1.891738  | -1.658952 |
| 53 | 9 | 0 | 1.287183  | 1.517215  | -1.428737 |
| 54 | 9 | 0 | -0.696749 | 2.002324  | -0.413567 |
| 55 | 9 | 0 | -0.676806 | 0.898780  | -2.428015 |
| 56 | 9 | 0 | -0.093880 | 3.108444  | -2.325126 |
| 57 | 8 | 0 | -0.007910 | -2.464039 | -0.801715 |

-----

### TS4B

Standard orientation:

-----

| Center<br>Number | Atomic<br>Number | Atomic<br>Type | Coordinates (Angstroms) |          |           |
|------------------|------------------|----------------|-------------------------|----------|-----------|
|                  |                  |                | X                       | Y        | Z         |
| 1                | 6                | 0              | -0.139369               | 1.895705 | 0.785578  |
| 2                | 6                | 0              | 0.966429                | 1.069913 | 0.682198  |
| 3                | 6                | 0              | 2.370733                | 2.909570 | -0.048181 |
| 4                | 6                | 0              | 1.096148                | 3.539134 | -0.598064 |
| 5                | 1                | 0              | 0.868203                | 0.008843 | 0.898411  |
| 6                | 1                | 0              | 2.677720                | 3.408651 | 0.879276  |
| 7                | 1                | 0              | 3.186078                | 3.000577 | -0.764755 |



|    |   |   |           |           |           |
|----|---|---|-----------|-----------|-----------|
| 8  | 1 | 0 | 0.857960  | 3.072628  | -1.561031 |
| 9  | 1 | 0 | 1.286050  | 4.600682  | -0.775694 |
| 10 | 1 | 0 | -1.317589 | -0.328580 | -0.055003 |
| 11 | 7 | 0 | 2.168279  | 1.481857  | 0.251024  |
| 12 | 6 | 0 | 3.271642  | 0.582536  | 0.219861  |
| 13 | 6 | 0 | 4.179482  | 0.621704  | -0.843005 |
| 14 | 6 | 0 | 3.437875  | -0.354719 | 1.243908  |
| 15 | 6 | 0 | 5.242769  | -0.274872 | -0.876117 |
| 16 | 1 | 0 | 4.043747  | 1.328906  | -1.654751 |
| 17 | 6 | 0 | 4.497416  | -1.255574 | 1.192693  |
| 18 | 1 | 0 | 2.748854  | -0.369303 | 2.082403  |
| 19 | 6 | 0 | 5.405772  | -1.218258 | 0.137112  |
| 20 | 1 | 0 | 5.939059  | -0.241675 | -1.708445 |
| 21 | 1 | 0 | 4.618152  | -1.979586 | 1.992651  |
| 22 | 1 | 0 | 6.235316  | -1.917481 | 0.104529  |
| 23 | 6 | 0 | -4.065035 | -1.262932 | 0.382993  |
| 24 | 6 | 0 | -2.991390 | -0.483069 | 1.175162  |
| 25 | 6 | 0 | -2.708645 | 0.773560  | -1.076408 |
| 26 | 6 | 0 | -3.248007 | -0.472673 | -1.854844 |
| 27 | 6 | 0 | -3.529850 | -1.696176 | -0.975617 |
| 28 | 1 | 0 | -2.605910 | -2.270776 | -0.838626 |
| 29 | 1 | 0 | -4.961027 | -0.645162 | 0.252156  |
| 30 | 1 | 0 | -2.521767 | -0.742478 | -2.627515 |
| 31 | 1 | 0 | -4.163037 | -0.151504 | -2.365588 |
| 32 | 1 | 0 | -4.243280 | -2.354515 | -1.479556 |
| 33 | 1 | 0 | -4.357516 | -2.124828 | 0.992026  |
| 34 | 7 | 0 | -2.121279 | 0.262732  | 0.196241  |
| 35 | 6 | 0 | -1.609805 | 1.420600  | -1.923232 |
| 36 | 1 | 0 | -1.344295 | 2.413927  | -1.561914 |
| 37 | 1 | 0 | -0.714840 | 0.792599  | -1.966843 |

|    |   |   |           |           |           |
|----|---|---|-----------|-----------|-----------|
| 38 | 1 | 0 | -1.998499 | 1.532829  | -2.940201 |
| 39 | 6 | 0 | -3.798420 | 1.807520  | -0.804036 |
| 40 | 1 | 0 | -3.423657 | 2.588195  | -0.134015 |
| 41 | 1 | 0 | -4.069713 | 2.273207  | -1.756395 |
| 42 | 1 | 0 | -4.705009 | 1.373485  | -0.377973 |
| 43 | 6 | 0 | -2.067839 | -1.456182 | 1.909103  |
| 44 | 1 | 0 | -1.225854 | -0.922021 | 2.359001  |
| 45 | 1 | 0 | -2.632426 | -1.947934 | 2.706765  |
| 46 | 1 | 0 | -1.678390 | -2.225883 | 1.235577  |
| 47 | 6 | 0 | -3.654033 | 0.453318  | 2.188685  |
| 48 | 1 | 0 | -4.372732 | -0.144378 | 2.758927  |
| 49 | 1 | 0 | -2.926791 | 0.872866  | 2.884786  |
| 50 | 1 | 0 | -4.199454 | 1.269138  | 1.711879  |
| 51 | 8 | 0 | -1.255576 | 1.374060  | 1.244278  |
| 52 | 5 | 0 | 0.481764  | -2.448583 | -0.485224 |
| 53 | 9 | 0 | -0.091697 | -1.288227 | -1.075140 |
| 54 | 9 | 0 | -0.498513 | -3.442470 | -0.414477 |
| 55 | 9 | 0 | 0.913889  | -2.120026 | 0.806588  |
| 56 | 9 | 0 | 1.552396  | -2.871074 | -1.260995 |
| 57 | 8 | 0 | -0.064061 | 3.346179  | 0.380057  |

-----

## IM5B

Standard orientation:

-----

| Center | Atomic | Atomic | Coordinates (Angstroms) |           |           |
|--------|--------|--------|-------------------------|-----------|-----------|
| Number | Number | Type   | X                       | Y         | Z         |
| 1      | 6      | 0      | 2.025202                | -1.511921 | -0.673839 |
| 2      | 6      | 0      | 0.568723                | -1.144684 | -0.814685 |
| 3      | 6      | 0      | 0.431662                | -0.934690 | 1.555921  |

|    |   |   |           |           |           |
|----|---|---|-----------|-----------|-----------|
| 4  | 6 | 0 | 1.493788  | -2.007654 | 1.576229  |
| 5  | 1 | 0 | 0.163206  | -1.067334 | -1.818728 |
| 6  | 1 | 0 | 0.825592  | 0.063392  | 1.759710  |
| 7  | 1 | 0 | -0.359683 | -1.179955 | 2.263491  |
| 8  | 1 | 0 | 1.048645  | -2.997624 | 1.443062  |
| 9  | 1 | 0 | 2.040420  | -1.973912 | 2.516906  |
| 10 | 7 | 0 | -0.169970 | -0.896672 | 0.200136  |
| 11 | 6 | 0 | -1.559987 | -0.543502 | 0.056628  |
| 12 | 6 | 0 | -2.362778 | -1.308319 | -0.784084 |
| 13 | 6 | 0 | -2.053074 | 0.539914  | 0.779522  |
| 14 | 6 | 0 | -3.705982 | -0.966144 | -0.910311 |
| 15 | 1 | 0 | -1.951671 | -2.167260 | -1.305518 |
| 16 | 6 | 0 | -3.396812 | 0.866827  | 0.637087  |
| 17 | 1 | 0 | -1.389626 | 1.137469  | 1.395338  |
| 18 | 6 | 0 | -4.221690 | 0.116746  | -0.201765 |
| 19 | 1 | 0 | -4.348432 | -1.556993 | -1.554606 |
| 20 | 1 | 0 | -3.798091 | 1.716096  | 1.180032  |
| 21 | 1 | 0 | -5.270716 | 0.376829  | -0.300765 |
| 22 | 8 | 0 | 2.723454  | -1.523863 | -1.650487 |
| 23 | 5 | 0 | 1.202283  | 2.013318  | -0.139968 |
| 24 | 9 | 0 | 0.594447  | 2.202567  | 1.113883  |
| 25 | 9 | 0 | 0.233411  | 1.639371  | -1.078739 |
| 26 | 9 | 0 | 2.140935  | 0.965642  | -0.017571 |
| 27 | 9 | 0 | 1.844873  | 3.176453  | -0.540880 |
| 28 | 8 | 0 | 2.474224  | -1.805679 | 0.538678  |

-----

**CH<sub>2</sub>(COMe)<sub>2</sub>**

Standard orientation:

-----

| Center | Atomic | Atomic | Coordinates (Angstroms) |  |  |
|--------|--------|--------|-------------------------|--|--|
|--------|--------|--------|-------------------------|--|--|

| Number | Number | Type | X         | Y         | Z         |
|--------|--------|------|-----------|-----------|-----------|
| 1      | 6      | 0    | 0.028224  | -0.861503 | -0.043642 |
| 2      | 1      | 0    | -0.019233 | -1.556434 | 0.798624  |
| 3      | 6      | 0    | -1.227748 | -0.016685 | -0.071937 |
| 4      | 6      | 0    | 1.240149  | 0.031937  | 0.064470  |
| 5      | 8      | 0    | 1.210551  | 1.211737  | 0.319331  |
| 6      | 6      | 0    | 2.535970  | -0.762610 | -0.182804 |
| 7      | 1      | 0    | 3.177370  | -0.205428 | -0.833229 |
| 8      | 1      | 0    | 3.033541  | -0.932446 | 0.749119  |
| 9      | 1      | 0    | 2.297341  | -1.702010 | -0.636106 |
| 10     | 6      | 0    | -2.486882 | -0.891364 | 0.073381  |
| 11     | 1      | 0    | -2.495273 | -1.635051 | -0.695878 |
| 12     | 1      | 0    | -2.480955 | -1.368769 | 1.030956  |
| 13     | 1      | 0    | -3.359270 | -0.278005 | -0.013967 |
| 14     | 8      | 0    | -1.250786 | 1.403550  | -0.237168 |
| 15     | 1      | 0    | -0.369917 | 1.757196  | -0.093627 |

### TS5B

Standard orientation:

| Center<br>Number | Atomic<br>Number | Atomic<br>Type | Coordinates (Angstroms) |          |           |
|------------------|------------------|----------------|-------------------------|----------|-----------|
|                  |                  |                | X                       | Y        | Z         |
| 1                | 5                | 0              | -2.991798               | 1.388749 | -0.217271 |
| 2                | 9                | 0              | -4.022404               | 1.292869 | -1.151566 |
| 3                | 9                | 0              | -2.742849               | 2.730555 | 0.081778  |
| 4                | 9                | 0              | -1.822973               | 0.802395 | -0.758077 |
| 5                | 9                | 0              | -3.337599               | 0.690248 | 0.946988  |
| 6                | 6                | 0              | 2.640738                | 2.148670 | -0.070206 |

|    |   |   |           |           |           |
|----|---|---|-----------|-----------|-----------|
| 7  | 1 | 0 | 3.131981  | 3.007772  | -0.516441 |
| 8  | 1 | 0 | 1.518542  | -0.455197 | 0.364880  |
| 9  | 6 | 0 | 1.359373  | 2.362804  | 0.518909  |
| 10 | 8 | 0 | 0.697063  | 1.516693  | 1.148142  |
| 11 | 6 | 0 | 3.344108  | 0.931733  | -0.057081 |
| 12 | 8 | 0 | 2.859662  | -0.197862 | 0.350813  |
| 13 | 6 | 0 | -1.081639 | -2.050714 | -1.596298 |
| 14 | 6 | 0 | 0.333204  | -1.515026 | -1.270304 |
| 15 | 6 | 0 | -0.049594 | -1.894940 | 1.282744  |
| 16 | 6 | 0 | -1.037226 | -2.954697 | 0.764623  |
| 17 | 6 | 0 | -1.912950 | -2.381872 | -0.347364 |
| 18 | 1 | 0 | -2.403249 | -1.471397 | 0.016592  |
| 19 | 1 | 0 | -0.962822 | -2.947915 | -2.214229 |
| 20 | 1 | 0 | -1.647766 | -3.285653 | 1.611469  |
| 21 | 1 | 0 | -0.497731 | -3.836673 | 0.399825  |
| 22 | 1 | 0 | -2.706175 | -3.087897 | -0.610387 |
| 23 | 1 | 0 | -1.618319 | -1.310842 | -2.197398 |
| 24 | 6 | 0 | -0.712676 | -1.008728 | 2.338796  |
| 25 | 1 | 0 | -0.030783 | -0.212321 | 2.647571  |
| 26 | 1 | 0 | -1.626301 | -0.543529 | 1.952957  |
| 27 | 1 | 0 | -0.970497 | -1.620419 | 3.208429  |
| 28 | 6 | 0 | 1.212993  | -2.518081 | 1.872392  |
| 29 | 1 | 0 | 1.910132  | -1.739413 | 2.196666  |
| 30 | 1 | 0 | 0.930151  | -3.119912 | 2.742169  |
| 31 | 1 | 0 | 1.726712  | -3.170920 | 1.163255  |
| 32 | 6 | 0 | 0.699994  | -0.342871 | -2.181336 |
| 33 | 1 | 0 | 1.728307  | -0.015008 | -2.000053 |
| 34 | 1 | 0 | 0.616156  | -0.666076 | -3.223826 |
| 35 | 1 | 0 | 0.020056  | 0.498783  | -2.025446 |
| 36 | 6 | 0 | 1.410237  | -2.591845 | -1.406170 |

|    |   |   |           |           |           |
|----|---|---|-----------|-----------|-----------|
| 37 | 1 | 0 | 1.527306  | -2.824555 | -2.469485 |
| 38 | 1 | 0 | 2.365982  | -2.219217 | -1.022928 |
| 39 | 1 | 0 | 1.150951  | -3.520725 | -0.893601 |
| 40 | 7 | 0 | 0.329748  | -0.968288 | 0.136972  |
| 41 | 1 | 0 | -0.314586 | -0.163977 | 0.145519  |
| 42 | 6 | 0 | 0.773466  | 3.766667  | 0.404996  |
| 43 | 1 | 0 | 1.139914  | 4.389543  | 1.230183  |
| 44 | 1 | 0 | 1.047772  | 4.259450  | -0.532228 |
| 45 | 1 | 0 | -0.313556 | 3.695454  | 0.486137  |
| 46 | 6 | 0 | 4.761071  | 0.930682  | -0.612354 |
| 47 | 1 | 0 | 5.102800  | 1.919597  | -0.926963 |
| 48 | 1 | 0 | 5.445092  | 0.542755  | 0.150234  |
| 49 | 1 | 0 | 4.812728  | 0.246617  | -1.467134 |

-----

### IM6B

Standard orientation:

-----

| Center<br>Number | Atomic<br>Number | Atomic<br>Type | Coordinates (Angstroms) |           |           |
|------------------|------------------|----------------|-------------------------|-----------|-----------|
|                  |                  |                | X                       | Y         | Z         |
| 1                | 6                | 0              | -0.001176               | -0.598964 | -0.024024 |
| 2                | 1                | 0              | 0.014596                | -1.683501 | 0.013171  |
| 3                | 6                | 0              | 1.280101                | 0.077645  | 0.021818  |
| 4                | 8                | 0              | 1.421907                | 1.288459  | 0.202316  |
| 5                | 6                | 0              | -1.233416               | 0.009317  | -0.037416 |
| 6                | 8                | 0              | -1.483672               | 1.281496  | -0.195667 |
| 7                | 6                | 0              | 2.513091                | -0.801598 | -0.097792 |
| 8                | 1                | 0              | 2.768190                | -1.205266 | 0.889839  |
| 9                | 1                | 0              | 2.344906                | -1.648618 | -0.769022 |
| 10               | 1                | 0              | 3.351084                | -0.200100 | -0.455775 |

|    |   |   |           |           |           |
|----|---|---|-----------|-----------|-----------|
| 11 | 6 | 0 | -2.483128 | -0.819184 | 0.109464  |
| 12 | 1 | 0 | -2.265905 | -1.875405 | 0.278350  |
| 13 | 1 | 0 | -3.073004 | -0.435777 | 0.949096  |
| 14 | 1 | 0 | -3.098574 | -0.714267 | -0.791151 |

-----

**IM7B**

Standard orientation:

-----

| Center<br>Number | Atomic<br>Number | Atomic<br>Type | Coordinates (Angstroms) |           |           |
|------------------|------------------|----------------|-------------------------|-----------|-----------|
|                  |                  |                | X                       | Y         | Z         |
| 1                | 6                | 0              | 2.622943                | -0.707729 | -0.291239 |
| 2                | 6                | 0              | 1.120494                | -0.842945 | -0.271364 |
| 3                | 6                | 0              | 0.953815                | 1.495349  | 0.161367  |
| 4                | 6                | 0              | 2.272884                | 1.319335  | 0.874706  |
| 5                | 1                | 0              | 0.699573                | -1.820971 | -0.483070 |
| 6                | 1                | 0              | 1.056192                | 1.957914  | -0.822722 |
| 7                | 1                | 0              | 0.269118                | 2.073590  | 0.780935  |
| 8                | 1                | 0              | 2.119761                | 0.924042  | 1.882784  |
| 9                | 1                | 0              | 2.797764                | 2.271372  | 0.928972  |
| 10               | 7                | 0              | 0.352025                | 0.155367  | -0.048054 |
| 11               | 6                | 0              | -1.082704               | 0.018171  | -0.033851 |
| 12               | 6                | 0              | -1.649006               | -1.029371 | 0.685991  |
| 13               | 6                | 0              | -1.850839               | 0.950698  | -0.726573 |
| 14               | 6                | 0              | -3.035543               | -1.149674 | 0.701980  |
| 15               | 1                | 0              | -1.020127               | -1.717421 | 1.242571  |
| 16               | 6                | 0              | -3.233799               | 0.810973  | -0.700291 |
| 17               | 1                | 0              | -1.374002               | 1.731587  | -1.309069 |
| 18               | 6                | 0              | -3.825398               | -0.232532 | 0.012328  |
| 19               | 1                | 0              | -3.494363               | -1.955257 | 1.265435  |

|    |   |   |           |           |           |
|----|---|---|-----------|-----------|-----------|
| 20 | 1 | 0 | -3.850333 | 1.518106  | -1.245196 |
| 21 | 1 | 0 | -4.906279 | -0.328623 | 0.031358  |
| 22 | 8 | 0 | 3.287206  | -1.614388 | -0.713453 |
| 23 | 8 | 0 | 3.147975  | 0.422443  | 0.161711  |

-----

**TS6B**

Standard orientation:

-----

| Center<br>Number | Atomic<br>Number | Atomic<br>Type | Coordinates (Angstroms) |           |           |
|------------------|------------------|----------------|-------------------------|-----------|-----------|
|                  |                  |                | X                       | Y         | Z         |
| 1                | 6                | 0              | 1.376106                | 1.668127  | -1.083067 |
| 2                | 6                | 0              | 0.610483                | 0.482082  | -0.500773 |
| 3                | 6                | 0              | -0.738338               | 2.218601  | 0.667299  |
| 4                | 6                | 0              | 0.633405                | 2.823788  | 0.836486  |
| 5                | 1                | 0              | 0.376017                | -0.138333 | -1.365734 |
| 6                | 1                | 0              | -1.316300               | 2.841030  | -0.031708 |
| 7                | 1                | 0              | -1.248833               | 2.233678  | 1.636835  |
| 8                | 1                | 0              | 1.231516                | 2.286916  | 1.580078  |
| 9                | 1                | 0              | 0.553789                | 3.868023  | 1.136354  |
| 10               | 7                | 0              | -0.625418               | 0.850171  | 0.180242  |
| 11               | 6                | 0              | -1.803685               | 0.158454  | -0.124254 |
| 12               | 6                | 0              | -1.776514               | -1.127360 | -0.701012 |
| 13               | 6                | 0              | -3.059385               | 0.722383  | 0.170131  |
| 14               | 6                | 0              | -2.959507               | -1.798565 | -0.987956 |
| 15               | 1                | 0              | -0.833470               | -1.625091 | -0.897343 |
| 16               | 6                | 0              | -4.233625               | 0.031567  | -0.118218 |
| 17               | 1                | 0              | -3.132132               | 1.703382  | 0.623627  |
| 18               | 6                | 0              | -4.200366               | -1.229506 | -0.705683 |
| 19               | 1                | 0              | -2.902794               | -2.787993 | -1.433037 |



|    |   |   |           |           |           |
|----|---|---|-----------|-----------|-----------|
| 20 | 1 | 0 | -5.185562 | 0.498412  | 0.119026  |
| 21 | 1 | 0 | -5.118829 | -1.761442 | -0.931774 |
| 22 | 8 | 0 | 2.041995  | 1.566578  | -2.083082 |
| 23 | 6 | 0 | 1.900212  | -0.551544 | 0.610033  |
| 24 | 1 | 0 | 2.499909  | 0.283611  | 0.991437  |
| 25 | 6 | 0 | 2.465456  | -1.437562 | -0.504159 |
| 26 | 8 | 0 | 1.811410  | -1.701281 | -1.489406 |
| 27 | 6 | 0 | 0.862874  | -1.181823 | 1.561211  |
| 28 | 8 | 0 | 0.299014  | -2.208997 | 1.252023  |
| 29 | 8 | 0 | 1.332422  | 2.829379  | -0.419274 |
| 30 | 6 | 0 | 3.849982  | -1.976079 | -0.272626 |
| 31 | 1 | 0 | 3.928999  | -2.405448 | 0.732419  |
| 32 | 1 | 0 | 4.097735  | -2.726068 | -1.024911 |
| 33 | 1 | 0 | 4.564567  | -1.146432 | -0.327577 |
| 34 | 6 | 0 | 0.619127  | -0.479848 | 2.867306  |
| 35 | 1 | 0 | 0.285240  | 0.546966  | 2.684769  |
| 36 | 1 | 0 | -0.134929 | -1.018054 | 3.443698  |
| 37 | 1 | 0 | 1.556922  | -0.426082 | 3.431735  |

-----  
**9a''**

Standard orientation:

| Center<br>Number | Atomic<br>Number | Atomic<br>Type | Coordinates (Angstroms) |           |           |
|------------------|------------------|----------------|-------------------------|-----------|-----------|
|                  |                  |                | X                       | Y         | Z         |
| 1                | 6                | 0              | 1.410279                | 1.608424  | -1.096862 |
| 2                | 6                | 0              | 0.614620                | 0.443455  | -0.511969 |
| 3                | 6                | 0              | -0.655658               | 2.215319  | 0.689984  |
| 4                | 6                | 0              | 0.738430                | 2.771727  | 0.844885  |
| 5                | 1                | 0              | 0.343060                | -0.159742 | -1.378509 |

|    |   |   |           |           |           |
|----|---|---|-----------|-----------|-----------|
| 6  | 1 | 0 | -1.221605 | 2.862557  | 0.003652  |
| 7  | 1 | 0 | -1.151938 | 2.240529  | 1.666725  |
| 8  | 1 | 0 | 1.327474  | 2.209077  | 1.576697  |
| 9  | 1 | 0 | 0.698599  | 3.815905  | 1.152744  |
| 10 | 7 | 0 | -0.595720 | 0.847794  | 0.192652  |
| 11 | 6 | 0 | -1.798906 | 0.191676  | -0.089395 |
| 12 | 6 | 0 | -1.818238 | -1.096474 | -0.661521 |
| 13 | 6 | 0 | -3.032625 | 0.793272  | 0.222759  |
| 14 | 6 | 0 | -3.024653 | -1.734475 | -0.925617 |
| 15 | 1 | 0 | -0.892865 | -1.620983 | -0.872585 |
| 16 | 6 | 0 | -4.230831 | 0.135280  | -0.042908 |
| 17 | 1 | 0 | -3.069255 | 1.778552  | 0.671362  |
| 18 | 6 | 0 | -4.243666 | -1.128849 | -0.624657 |
| 19 | 1 | 0 | -3.004026 | -2.726909 | -1.367122 |
| 20 | 1 | 0 | -5.164910 | 0.630419  | 0.207596  |
| 21 | 1 | 0 | -5.180739 | -1.635127 | -0.832553 |
| 22 | 8 | 0 | 2.053573  | 1.494279  | -2.110195 |
| 23 | 6 | 0 | 1.614092  | -0.407650 | 0.330150  |
| 24 | 1 | 0 | 2.365240  | 0.230224  | 0.811447  |
| 25 | 6 | 0 | 2.320456  | -1.439858 | -0.553397 |
| 26 | 8 | 0 | 1.797218  | -1.868126 | -1.558854 |
| 27 | 6 | 0 | 0.871320  | -1.175762 | 1.442457  |
| 28 | 8 | 0 | 0.392638  | -2.265555 | 1.214841  |
| 29 | 8 | 0 | 1.421589  | 2.762574  | -0.419620 |
| 30 | 6 | 0 | 3.667593  | -1.902514 | -0.072084 |
| 31 | 1 | 0 | 3.620899  | -2.174947 | 0.988212  |
| 32 | 1 | 0 | 4.013602  | -2.749916 | -0.665348 |
| 33 | 1 | 0 | 4.378328  | -1.072678 | -0.162403 |
| 34 | 6 | 0 | 0.802453  | -0.522066 | 2.793857  |
| 35 | 1 | 0 | 0.301936  | 0.448606  | 2.715553  |

|    |   |   |          |           |          |
|----|---|---|----------|-----------|----------|
| 36 | 1 | 0 | 0.259735 | -1.163623 | 3.489873 |
| 37 | 1 | 0 | 1.818369 | -0.340919 | 3.162633 |

-----

**TS7B**

Standard orientation:

-----

| Center<br>Number | Atomic<br>Number | Atomic<br>Type | Coordinates (Angstroms) |           |           |
|------------------|------------------|----------------|-------------------------|-----------|-----------|
|                  |                  |                | X                       | Y         | Z         |
| 1                | 6                | 0              | -0.338823               | 0.266473  | 0.751405  |
| 2                | 6                | 0              | 0.937746                | -0.084262 | 0.019426  |
| 3                | 6                | 0              | 1.528755                | -1.397653 | 1.919065  |
| 4                | 6                | 0              | 0.904363                | -0.291999 | 2.742043  |
| 5                | 1                | 0              | 1.030872                | 0.170307  | -1.028709 |
| 6                | 1                | 0              | 0.865025                | -2.262086 | 1.825564  |
| 7                | 1                | 0              | 2.475960                | -1.705571 | 2.361021  |
| 8                | 1                | 0              | 1.642497                | 0.494377  | 2.933375  |
| 9                | 1                | 0              | 0.590491                | -0.711202 | 3.701322  |
| 10               | 1                | 0              | -0.710100               | 1.246777  | 0.436313  |
| 11               | 7                | 0              | 1.795113                | -0.891783 | 0.550952  |
| 12               | 6                | 0              | 2.936644                | -1.385987 | -0.172897 |
| 13               | 6                | 0              | 3.360794                | -2.696028 | 0.041577  |
| 14               | 6                | 0              | 3.590799                | -0.548365 | -1.073743 |
| 15               | 6                | 0              | 4.455880                | -3.172275 | -0.672829 |
| 16               | 1                | 0              | 2.838321                | -3.344002 | 0.737302  |
| 17               | 6                | 0              | 4.686289                | -1.038923 | -1.777523 |
| 18               | 1                | 0              | 3.262153                | 0.478394  | -1.198367 |
| 19               | 6                | 0              | 5.119375                | -2.348639 | -1.580652 |
| 20               | 1                | 0              | 4.786566                | -4.194149 | -0.518628 |
| 21               | 1                | 0              | 5.205174                | -0.388645 | -2.474257 |

|    |   |   |           |           |           |
|----|---|---|-----------|-----------|-----------|
| 22 | 1 | 0 | 5.975344  | -2.726340 | -2.130635 |
| 23 | 6 | 0 | -4.203336 | -0.409355 | -1.799644 |
| 24 | 6 | 0 | -2.690604 | -0.404031 | -1.498983 |
| 25 | 6 | 0 | -3.472693 | -1.033653 | 0.852946  |
| 26 | 6 | 0 | -4.864348 | -0.383327 | 0.611317  |
| 27 | 6 | 0 | -4.980500 | 0.347248  | -0.730894 |
| 28 | 1 | 0 | -4.580379 | 1.363607  | -0.640628 |
| 29 | 1 | 0 | -4.573698 | -1.440702 | -1.854255 |
| 30 | 1 | 0 | -5.082951 | 0.316240  | 1.425240  |
| 31 | 1 | 0 | -5.618006 | -1.177900 | 0.666089  |
| 32 | 1 | 0 | -6.033789 | 0.443113  | -1.013519 |
| 33 | 1 | 0 | -4.354931 | 0.031461  | -2.791232 |
| 34 | 7 | 0 | -2.508971 | -0.301859 | -0.014415 |
| 35 | 6 | 0 | -3.078354 | -0.798941 | 2.311901  |
| 36 | 1 | 0 | -2.164650 | -1.336664 | 2.576185  |
| 37 | 1 | 0 | -2.915357 | 0.266596  | 2.500215  |
| 38 | 1 | 0 | -3.891902 | -1.149091 | 2.956531  |
| 39 | 6 | 0 | -3.511939 | -2.552223 | 0.617674  |
| 40 | 1 | 0 | -2.501563 | -2.972559 | 0.656396  |
| 41 | 1 | 0 | -4.104403 | -3.021448 | 1.411121  |
| 42 | 1 | 0 | -3.971673 | -2.822782 | -0.335976 |
| 43 | 6 | 0 | -2.052754 | 0.854412  | -2.095952 |
| 44 | 1 | 0 | -0.987238 | 0.904860  | -1.851222 |
| 45 | 1 | 0 | -2.145476 | 0.841066  | -3.187809 |
| 46 | 1 | 0 | -2.519430 | 1.765081  | -1.708573 |
| 47 | 6 | 0 | -2.023478 | -1.625576 | -2.144797 |
| 48 | 1 | 0 | -2.290018 | -1.641445 | -3.207681 |
| 49 | 1 | 0 | -0.934013 | -1.570147 | -2.070838 |
| 50 | 1 | 0 | -2.352282 | -2.568111 | -1.702999 |
| 51 | 8 | 0 | -1.192001 | -0.767699 | 0.279512  |

|    |   |   |           |          |           |
|----|---|---|-----------|----------|-----------|
| 52 | 6 | 0 | 1.765559  | 2.659749 | -0.290029 |
| 53 | 1 | 0 | 2.623897  | 2.513935 | -0.941928 |
| 54 | 6 | 0 | 2.012848  | 2.631930 | 1.116406  |
| 55 | 8 | 0 | 1.189018  | 2.841581 | 2.019411  |
| 56 | 6 | 0 | 0.551536  | 3.057736 | -0.926772 |
| 57 | 8 | 0 | -0.530949 | 3.295463 | -0.364442 |
| 58 | 8 | 0 | -0.250399 | 0.257107 | 2.134941  |
| 59 | 6 | 0 | 3.459970  | 2.339722 | 1.521454  |
| 60 | 1 | 0 | 3.473975  | 1.789326 | 2.465091  |
| 61 | 1 | 0 | 4.014934  | 1.779005 | 0.762951  |
| 62 | 1 | 0 | 3.984966  | 3.288925 | 1.686534  |
| 63 | 6 | 0 | 0.622263  | 3.183804 | -2.450550 |
| 64 | 1 | 0 | 1.255218  | 4.033451 | -2.733612 |
| 65 | 1 | 0 | 1.062930  | 2.289837 | -2.906899 |
| 66 | 1 | 0 | -0.380756 | 3.341354 | -2.854315 |

-----

**9a**

Standard orientation:

-----

| Center<br>Number | Atomic<br>Number | Atomic<br>Type | Coordinates (Angstroms) |           |           |
|------------------|------------------|----------------|-------------------------|-----------|-----------|
|                  |                  |                | X                       | Y         | Z         |
| 1                | 6                | 0              | -0.313154               | -0.915323 | -0.480823 |
| 2                | 6                | 0              | 1.044409                | -0.479933 | 0.119083  |
| 3                | 6                | 0              | 1.311502                | 0.361191  | -2.208363 |
| 4                | 6                | 0              | 0.789086                | -1.000036 | -2.626575 |
| 5                | 1                | 0              | 0.794507                | 0.142786  | 0.980416  |
| 6                | 1                | 0              | 0.527762                | 1.122618  | -2.325935 |
| 7                | 1                | 0              | 2.127212                | 0.607268  | -2.893353 |
| 8                | 1                | 0              | 1.617482                | -1.708955 | -2.727376 |

|    |   |   |           |           |           |
|----|---|---|-----------|-----------|-----------|
| 9  | 1 | 0 | 0.307912  | -0.909283 | -3.606302 |
| 10 | 1 | 0 | -0.818640 | -1.624369 | 0.171825  |
| 11 | 7 | 0 | 1.810669  | 0.337839  | -0.829471 |
| 12 | 6 | 0 | 2.513727  | 1.459106  | -0.358459 |
| 13 | 6 | 0 | 2.913715  | 2.493152  | -1.237884 |
| 14 | 6 | 0 | 2.876920  | 1.595992  | 1.002659  |
| 15 | 6 | 0 | 3.646818  | 3.587075  | -0.778697 |
| 16 | 1 | 0 | 2.646368  | 2.461442  | -2.286343 |
| 17 | 6 | 0 | 3.605007  | 2.699828  | 1.446288  |
| 18 | 1 | 0 | 2.597086  | 0.849307  | 1.735710  |
| 19 | 6 | 0 | 4.004016  | 3.706339  | 0.565405  |
| 20 | 1 | 0 | 3.931683  | 4.358753  | -1.489982 |
| 21 | 1 | 0 | 3.861803  | 2.763960  | 2.501013  |
| 22 | 1 | 0 | 4.572998  | 4.561927  | 0.917681  |
| 23 | 6 | 0 | -4.032176 | 1.367261  | 1.460675  |
| 24 | 6 | 0 | -2.535481 | 1.106376  | 1.143388  |
| 25 | 6 | 0 | -3.500654 | 0.115814  | -1.036606 |
| 26 | 6 | 0 | -4.861223 | -0.196406 | -0.329826 |
| 27 | 6 | 0 | -4.907667 | 0.154286  | 1.166591  |
| 28 | 1 | 0 | -4.570482 | -0.702837 | 1.758646  |
| 29 | 1 | 0 | -4.393631 | 2.223977  | 0.878435  |
| 30 | 1 | 0 | -5.086556 | -1.261998 | -0.442875 |
| 31 | 1 | 0 | -5.645235 | 0.350145  | -0.868389 |
| 32 | 1 | 0 | -5.943508 | 0.355155  | 1.467955  |
| 33 | 1 | 0 | -4.108949 | 1.658397  | 2.515111  |
| 34 | 7 | 0 | -2.441861 | 0.092683  | 0.024766  |
| 35 | 6 | 0 | -3.228287 | -1.029632 | -2.023781 |
| 36 | 1 | 0 | -2.305554 | -0.880396 | -2.586467 |
| 37 | 1 | 0 | -3.155388 | -1.983415 | -1.490401 |
| 38 | 1 | 0 | -4.063035 | -1.095817 | -2.731970 |

|    |   |   |           |           |           |
|----|---|---|-----------|-----------|-----------|
| 39 | 6 | 0 | -3.571214 | 1.434619  | -1.838988 |
| 40 | 1 | 0 | -2.586237 | 1.698051  | -2.238724 |
| 41 | 1 | 0 | -4.255574 | 1.312843  | -2.687461 |
| 42 | 1 | 0 | -3.938751 | 2.274255  | -1.243075 |
| 43 | 6 | 0 | -1.865846 | 0.462431  | 2.374736  |
| 44 | 1 | 0 | -0.793955 | 0.309529  | 2.206893  |
| 45 | 1 | 0 | -1.966405 | 1.118771  | 3.247405  |
| 46 | 1 | 0 | -2.315777 | -0.507861 | 2.606985  |
| 47 | 6 | 0 | -1.842391 | 2.453822  | 0.857429  |
| 48 | 1 | 0 | -1.919096 | 3.085924  | 1.750798  |
| 49 | 1 | 0 | -0.782645 | 2.323909  | 0.627474  |
| 50 | 1 | 0 | -2.310273 | 2.993578  | 0.029660  |
| 51 | 8 | 0 | -1.136030 | 0.252843  | -0.594769 |
| 52 | 6 | 0 | 1.892485  | -1.677069 | 0.727866  |
| 53 | 1 | 0 | 2.779729  | -1.196419 | 1.144810  |
| 54 | 6 | 0 | 2.416714  | -2.727620 | -0.261135 |
| 55 | 8 | 0 | 1.822904  | -3.767353 | -0.511440 |
| 56 | 6 | 0 | 1.122533  | -2.306317 | 1.898598  |
| 57 | 8 | 0 | 0.217312  | -3.103851 | 1.718364  |
| 58 | 8 | 0 | -0.167578 | -1.561642 | -1.717204 |
| 59 | 6 | 0 | 3.770663  | -2.460588 | -0.890285 |
| 60 | 1 | 0 | 3.675178  | -2.461047 | -1.981847 |
| 61 | 1 | 0 | 4.218126  | -1.519227 | -0.568208 |
| 62 | 1 | 0 | 4.440520  | -3.288110 | -0.625813 |
| 63 | 6 | 0 | 1.515376  | -1.847862 | 3.282969  |
| 64 | 1 | 0 | 2.602729  | -1.797990 | 3.399076  |
| 65 | 1 | 0 | 1.113511  | -0.837130 | 3.446074  |
| 66 | 1 | 0 | 1.081290  | -2.510413 | 4.036298  |

-----

**Table S5**

|                 | Gsol         | Thermal<br>correction to<br>Gibbs Free<br>Energy (TCG) | Esol         | $\Delta$ Gsol=Esol+TCG | $N_{\text{imag}}$ |
|-----------------|--------------|--------------------------------------------------------|--------------|------------------------|-------------------|
| <b>TEMPO-CI</b> | -932.654097  | 0.256733                                               | -943.8368671 | -943.5801341           | 0                 |
| <b>TS1A-CI</b>  | -1425.925062 | 0.450571                                               | -1426.683321 | -1426.23275            | -1454.77          |
| <b>IM1A-CI</b>  | -942.137184  | 0.192871                                               | -942.4955872 | -942.3027162           | 0                 |

**TEMPO-CI**

Standard orientation:

| Center<br>Number | Atomic<br>Number | Atomic<br>Type | Coordinates (Angstroms) |           |           |
|------------------|------------------|----------------|-------------------------|-----------|-----------|
|                  |                  |                | X                       | Y         | Z         |
| 1                | 6                | 0              | -2.096665               | -0.797504 | 0.716404  |
| 2                | 6                | 0              | -0.783757               | -1.266094 | 0.076990  |
| 3                | 6                | 0              | -0.319907               | 1.355885  | 0.030118  |
| 4                | 6                | 0              | -1.848889               | 1.614302  | 0.015812  |
| 5                | 6                | 0              | -2.709726               | 0.350376  | -0.079348 |
| 6                | 1                | 0              | -2.811492               | 0.050321  | -1.128840 |
| 7                | 1                | 0              | -1.933322               | -0.497888 | 1.756508  |
| 8                | 1                | 0              | -2.077640               | 2.279228  | -0.821451 |
| 9                | 1                | 0              | -2.079378               | 2.155530  | 0.938619  |
| 10               | 1                | 0              | -3.715358               | 0.571259  | 0.286535  |
| 11               | 1                | 0              | -2.763300               | -1.664665 | 0.735143  |
| 12               | 7                | 0              | -0.053848               | -0.044891 | -0.469907 |
| 13               | 6                | 0              | 0.437639                | 2.319534  | -0.868702 |
| 14               | 1                | 0              | 1.516152                | 2.158809  | -0.798990 |
| 15               | 1                | 0              | 0.118611                | 2.221286  | -1.910389 |
| 16               | 1                | 0              | 0.202033                | 3.331066  | -0.527632 |
| 17               | 6                | 0              | 0.267968                | 1.392571  | 1.454934  |



|    |    |   |           |           |           |
|----|----|---|-----------|-----------|-----------|
| 18 | 1  | 0 | 1.305354  | 1.044151  | 1.447775  |
| 19 | 1  | 0 | 0.242023  | 2.441067  | 1.765578  |
| 20 | 1  | 0 | -0.320401 | 0.813932  | 2.168501  |
| 21 | 6  | 0 | -1.027349 | -2.189221 | -1.119015 |
| 22 | 1  | 0 | -0.085582 | -2.510691 | -1.567267 |
| 23 | 1  | 0 | -1.554775 | -3.070350 | -0.746476 |
| 24 | 1  | 0 | -1.644687 | -1.707498 | -1.882515 |
| 25 | 6  | 0 | 0.168864  | -1.935934 | 1.073047  |
| 26 | 1  | 0 | -0.319741 | -2.857895 | 1.401972  |
| 27 | 1  | 0 | 1.120557  | -2.176715 | 0.593196  |
| 28 | 1  | 0 | 0.356241  | -1.309450 | 1.947143  |
| 29 | 8  | 0 | 0.806292  | -0.218345 | -1.266736 |
| 30 | 17 | 0 | 3.284838  | -0.251411 | 0.115552  |

-----

### TS1A-CI

Standard orientation:

-----

| Center<br>Number | Atomic<br>Number | Atomic<br>Type | Coordinates (Angstroms) |           |           |
|------------------|------------------|----------------|-------------------------|-----------|-----------|
|                  |                  |                | X                       | Y         | Z         |
| 1                | 6                | 0              | -2.419135               | -2.525905 | 0.839279  |
| 2                | 6                | 0              | -2.269818               | -1.026751 | 1.137590  |
| 3                | 6                | 0              | -1.319054               | -1.021792 | -1.319973 |
| 4                | 6                | 0              | -0.856109               | -2.493776 | -1.148930 |
| 5                | 6                | 0              | -1.144136               | -3.100151 | 0.231456  |
| 6                | 1                | 0              | -0.304734               | -2.903935 | 0.909381  |
| 7                | 1                | 0              | -3.265386               | -2.692042 | 0.163181  |
| 8                | 1                | 0              | 0.217911                | -2.555109 | -1.354068 |
| 9                | 1                | 0              | -1.361088               | -3.080581 | -1.923727 |
| 10               | 1                | 0              | -1.223355               | -4.187577 | 0.143170  |

|    |   |   |           |           |           |
|----|---|---|-----------|-----------|-----------|
| 11 | 1 | 0 | -2.665154 | -3.024868 | 1.782074  |
| 12 | 7 | 0 | -1.531443 | -0.395741 | 0.012445  |
| 13 | 6 | 0 | -0.270244 | -0.210466 | -2.076773 |
| 14 | 1 | 0 | -0.625430 | 0.801913  | -2.279089 |
| 15 | 1 | 0 | 0.671497  | -0.163423 | -1.519908 |
| 16 | 1 | 0 | -0.076165 | -0.720033 | -3.025394 |
| 17 | 6 | 0 | -2.655368 | -0.926503 | -2.079780 |
| 18 | 1 | 0 | -2.994722 | 0.112805  | -2.091435 |
| 19 | 1 | 0 | -2.499169 | -1.270010 | -3.107607 |
| 20 | 1 | 0 | -3.431218 | -1.550112 | -1.627863 |
| 21 | 6 | 0 | -1.462119 | -0.801004 | 2.422361  |
| 22 | 1 | 0 | -1.334964 | 0.266991  | 2.622007  |
| 23 | 1 | 0 | -2.013044 | -1.240471 | 3.258593  |
| 24 | 1 | 0 | -0.475299 | -1.272218 | 2.373914  |
| 25 | 6 | 0 | -3.634519 | -0.342099 | 1.266817  |
| 26 | 1 | 0 | -4.176792 | -0.790223 | 2.105779  |
| 27 | 1 | 0 | -3.509759 | 0.727691  | 1.449799  |
| 28 | 1 | 0 | -4.225640 | -0.474289 | 0.356435  |
| 29 | 8 | 0 | -1.177247 | 0.808271  | 0.175470  |
| 30 | 6 | 0 | 0.703267  | 2.760014  | 1.590071  |
| 31 | 6 | 0 | 1.099188  | 1.351752  | 1.170180  |
| 32 | 6 | 0 | 2.371302  | 2.187967  | -0.773156 |
| 33 | 6 | 0 | 1.259861  | 3.224751  | -0.805104 |
| 34 | 1 | 0 | 1.134366  | 0.630607  | 1.990216  |
| 35 | 1 | 0 | -0.016365 | 0.943655  | 0.620843  |
| 36 | 1 | 0 | 1.160731  | 2.943497  | 2.569117  |
| 37 | 1 | 0 | 3.329529  | 2.677779  | -0.559130 |
| 38 | 1 | 0 | 2.465259  | 1.664425  | -1.730026 |
| 39 | 1 | 0 | 0.311311  | 2.769177  | -1.113449 |
| 40 | 1 | 0 | 1.525771  | 3.982912  | -1.547761 |

|    |    |   |           |           |           |
|----|----|---|-----------|-----------|-----------|
| 41 | 1  | 0 | -0.381011 | 2.767174  | 1.735945  |
| 42 | 7  | 0 | 2.111664  | 1.173378  | 0.265293  |
| 43 | 6  | 0 | 2.777052  | -0.068808 | 0.161817  |
| 44 | 6  | 0 | 2.135262  | -1.258067 | 0.532337  |
| 45 | 6  | 0 | 4.083259  | -0.118676 | -0.340207 |
| 46 | 6  | 0 | 2.804266  | -2.472672 | 0.435004  |
| 47 | 1  | 0 | 1.096960  | -1.237539 | 0.852967  |
| 48 | 6  | 0 | 4.740246  | -1.341531 | -0.439177 |
| 49 | 1  | 0 | 4.591467  | 0.793923  | -0.632682 |
| 50 | 6  | 0 | 4.111105  | -2.522076 | -0.048561 |
| 51 | 1  | 0 | 2.288436  | -3.385849 | 0.718330  |
| 52 | 1  | 0 | 5.755900  | -1.366344 | -0.821941 |
| 53 | 1  | 0 | 4.628521  | -3.472297 | -0.132558 |
| 54 | 6  | 0 | 1.107984  | 3.840602  | 0.580272  |
| 55 | 1  | 0 | 2.063719  | 4.289416  | 0.874866  |
| 56 | 1  | 0 | 0.356289  | 4.632040  | 0.570521  |
| 57 | 17 | 0 | -3.449158 | 2.039084  | -0.764210 |

-----

### IM1A-CI

Standard orientation:

-----

| Center<br>Number | Atomic<br>Number | Atomic<br>Type | Coordinates (Angstroms) |           |           |
|------------------|------------------|----------------|-------------------------|-----------|-----------|
|                  |                  |                | X                       | Y         | Z         |
| 1                | 6                | 0              | 2.188617                | -0.505201 | 1.477569  |
| 2                | 6                | 0              | 0.889873                | 0.170359  | 1.102584  |
| 3                | 6                | 0              | 0.676784                | -1.600429 | -0.552618 |
| 4                | 6                | 0              | 2.086307                | -1.186694 | -0.968314 |
| 5                | 1                | 0              | 0.478576                | 1.002099  | 1.681019  |
| 6                | 1                | 0              | 1.916674                | -1.374712 | 2.091014  |

|    |    |   |           |           |           |
|----|----|---|-----------|-----------|-----------|
| 7  | 1  | 0 | 0.696535  | -2.531582 | 0.029418  |
| 8  | 1  | 0 | 0.044254  | -1.752423 | -1.428193 |
| 9  | 1  | 0 | 2.006098  | -0.265259 | -1.555242 |
| 10 | 1  | 0 | 2.497466  | -1.956352 | -1.626783 |
| 11 | 1  | 0 | 2.764848  | 0.170215  | 2.114403  |
| 12 | 7  | 0 | 0.074097  | -0.533548 | 0.261061  |
| 13 | 6  | 0 | -1.290843 | -0.211553 | 0.125576  |
| 14 | 6  | 0 | -1.729067 | 1.101457  | 0.343460  |
| 15 | 6  | 0 | -2.217375 | -1.202376 | -0.222176 |
| 16 | 6  | 0 | -3.079151 | 1.412994  | 0.235109  |
| 17 | 1  | 0 | -1.005286 | 1.884109  | 0.557442  |
| 18 | 6  | 0 | -3.565179 | -0.875492 | -0.335700 |
| 19 | 1  | 0 | -1.891390 | -2.225863 | -0.375366 |
| 20 | 6  | 0 | -4.004752 | 0.427215  | -0.105707 |
| 21 | 1  | 0 | -3.402214 | 2.437419  | 0.397715  |
| 22 | 1  | 0 | -4.277100 | -1.651901 | -0.598326 |
| 23 | 1  | 0 | -5.057287 | 0.674128  | -0.199674 |
| 24 | 6  | 0 | 2.997400  | -0.959309 | 0.246804  |
| 25 | 1  | 0 | 3.530486  | -1.879819 | 0.499570  |
| 26 | 1  | 0 | 3.750964  | -0.208255 | -0.005316 |
| 27 | 17 | 0 | 2.336060  | 1.881600  | -0.675802 |

**Table S6**

|                             | Gsol         | Thermal<br>correction to<br>Gibbs Free<br>Energy (TCG) | Esol         | $\Delta$ Gsol=Esol+TCG | $N_{\text{imag}}$ |
|-----------------------------|--------------|--------------------------------------------------------|--------------|------------------------|-------------------|
| <b>TEMPO-CO<sub>3</sub></b> | -1230.120953 | 0.499015                                               | -1230.984126 | -1230.485111           | 0                 |
| <b>TS1B-CO<sub>3</sub></b>  | -1748.518314 | 0.69871                                                | -1749.729939 | -1749.031229           | -1331.52          |
| <b>IM1B-CO<sub>3</sub></b>  | -1748.595616 | 0.701989                                               | -1749.808327 | -1749.106338           | 0                 |

## TEMPO-CO<sub>3</sub>

Standard orientation:

---

| Center<br>Number | Atomic<br>Number | Atomic<br>Type | Coordinates (Angstroms) |           |           |
|------------------|------------------|----------------|-------------------------|-----------|-----------|
|                  |                  |                | X                       | Y         | Z         |
| 1                | 6                | 0              | 3.710447                | 1.918539  | 0.340941  |
| 2                | 6                | 0              | 2.281281                | 1.342497  | 0.118770  |
| 3                | 6                | 0              | 3.620357                | -0.959259 | 0.224259  |
| 4                | 6                | 0              | 4.937105                | -0.227749 | -0.207108 |
| 5                | 6                | 0              | 4.742647                | 1.254659  | -0.566530 |
| 6                | 1                | 0              | 4.418814                | 1.348450  | -1.610659 |
| 7                | 1                | 0              | 4.000217                | 1.800657  | 1.389456  |
| 8                | 1                | 0              | 5.371885                | -0.760644 | -1.057136 |
| 9                | 1                | 0              | 5.627367                | -0.322846 | 0.636637  |
| 10               | 1                | 0              | 5.700740                | 1.774415  | -0.489278 |
| 11               | 1                | 0              | 3.641857                | 2.992666  | 0.142565  |
| 12               | 7                | 0              | 2.536098                | -0.082705 | -0.389891 |
| 13               | 6                | 0              | 3.499861                | -2.338662 | -0.405211 |
| 14               | 1                | 0              | 2.509983                | -2.749992 | -0.192794 |
| 15               | 1                | 0              | 3.660428                | -2.309902 | -1.484130 |
| 16               | 1                | 0              | 4.270447                | -2.972839 | 0.041245  |
| 17               | 6                | 0              | 3.491125                | -1.050293 | 1.745539  |
| 18               | 1                | 0              | 2.497231                | -1.413709 | 2.019850  |
| 19               | 1                | 0              | 4.249253                | -1.767223 | 2.072978  |
| 20               | 1                | 0              | 3.697153                | -0.106409 | 2.250595  |
| 21               | 6                | 0              | 1.543381                | 2.064101  | -0.999095 |
| 22               | 1                | 0              | 0.600271                | 1.560156  | -1.230981 |
| 23               | 1                | 0              | 1.321110                | 3.071513  | -0.638723 |
| 24               | 1                | 0              | 2.142890                | 2.140565  | -1.910495 |

|    |   |   |           |           |           |
|----|---|---|-----------|-----------|-----------|
| 25 | 6 | 0 | 1.448622  | 1.402614  | 1.400418  |
| 26 | 1 | 0 | 1.468672  | 2.451125  | 1.716828  |
| 27 | 1 | 0 | 0.417897  | 1.096718  | 1.210998  |
| 28 | 1 | 0 | 1.853391  | 0.792772  | 2.204865  |
| 29 | 8 | 0 | 2.191498  | -0.356253 | -1.496525 |
| 30 | 6 | 0 | -0.072606 | -1.143821 | -0.293952 |
| 31 | 8 | 0 | -0.017081 | -1.646707 | -1.409484 |
| 32 | 8 | 0 | -1.051163 | -0.096235 | -0.070098 |
| 33 | 8 | 0 | 0.705170  | -1.289788 | 0.675207  |
| 34 | 6 | 0 | -3.635530 | 1.566974  | -0.790757 |
| 35 | 6 | 0 | -3.224033 | 0.142052  | -1.202548 |
| 36 | 6 | 0 | -2.891953 | -0.082468 | 1.392681  |
| 37 | 6 | 0 | -2.610009 | 1.430622  | 1.510668  |
| 38 | 6 | 0 | -2.653938 | 2.205193  | 0.184980  |
| 39 | 1 | 0 | -1.656456 | 2.218299  | -0.266147 |
| 40 | 1 | 0 | -4.640646 | 1.562725  | -0.355164 |
| 41 | 1 | 0 | -1.636583 | 1.579984  | 1.988128  |
| 42 | 1 | 0 | -3.363615 | 1.834336  | 2.197149  |
| 43 | 1 | 0 | -2.937208 | 3.245715  | 0.373285  |
| 44 | 1 | 0 | -3.701618 | 2.160643  | -1.710155 |
| 45 | 7 | 0 | -2.490502 | -0.594456 | -0.018928 |
| 46 | 6 | 0 | -2.058617 | -0.864299 | 2.399839  |
| 47 | 1 | 0 | -2.312835 | -1.925621 | 2.364092  |
| 48 | 1 | 0 | -0.992107 | -0.748306 | 2.198594  |
| 49 | 1 | 0 | -2.287287 | -0.481017 | 3.399835  |
| 50 | 6 | 0 | -4.364522 | -0.424485 | 1.636446  |
| 51 | 1 | 0 | -4.547670 | -1.471882 | 1.385131  |
| 52 | 1 | 0 | -4.566471 | -0.284261 | 2.703178  |
| 53 | 1 | 0 | -5.064199 | 0.209106  | 1.089780  |
| 54 | 6 | 0 | -2.273225 | 0.182727  | -2.394423 |

|    |   |   |           |           |           |
|----|---|---|-----------|-----------|-----------|
| 55 | 1 | 0 | -1.754237 | -0.771663 | -2.495375 |
| 56 | 1 | 0 | -2.865351 | 0.388328  | -3.292544 |
| 57 | 1 | 0 | -1.522990 | 0.969575  | -2.289143 |
| 58 | 6 | 0 | -4.446649 | -0.684301 | -1.596405 |
| 59 | 1 | 0 | -4.991133 | -0.121334 | -2.362154 |
| 60 | 1 | 0 | -4.139759 | -1.644066 | -2.013078 |
| 61 | 1 | 0 | -5.128109 | -0.866024 | -0.764721 |
| 62 | 8 | 0 | -2.568795 | -1.879483 | -0.118081 |

-----

### TS1B-CO<sub>3</sub>

Standard orientation:

-----

| Center | Atomic | Atomic | Coordinates (Angstroms) |           |           |
|--------|--------|--------|-------------------------|-----------|-----------|
| Number | Number | Type   | X                       | Y         | Z         |
| 1      | 6      | 0      | 1.626890                | -3.055104 | 1.498433  |
| 2      | 6      | 0      | 0.489929                | -2.051195 | 1.200120  |
| 3      | 6      | 0      | 1.808885                | -1.756559 | -1.024225 |
| 4      | 6      | 0      | 3.136218                | -2.220923 | -0.349480 |
| 5      | 6      | 0      | 2.983234                | -2.434165 | 1.161318  |
| 6      | 1      | 0      | 3.067766                | -1.466579 | 1.676197  |
| 7      | 1      | 0      | 1.486725                | -3.981821 | 0.931381  |
| 8      | 1      | 0      | 3.927424                | -1.488124 | -0.541501 |
| 9      | 1      | 0      | 3.443418                | -3.156796 | -0.829817 |
| 10     | 1      | 0      | 3.800842                | -3.058953 | 1.533570  |
| 11     | 1      | 0      | 1.568777                | -3.321962 | 2.558687  |
| 12     | 7      | 0      | 0.904025                | -1.228486 | 0.027001  |
| 13     | 6      | 0      | 2.043802                | -0.652938 | -2.048924 |
| 14     | 1      | 0      | 1.089366                | -0.359397 | -2.497527 |
| 15     | 1      | 0      | 2.513165                | 0.223926  | -1.595775 |

|    |   |   |           |           |           |
|----|---|---|-----------|-----------|-----------|
| 16 | 1 | 0 | 2.717360  | -1.040432 | -2.819837 |
| 17 | 6 | 0 | 1.109902  | -2.927472 | -1.733516 |
| 18 | 1 | 0 | 0.120314  | -2.607914 | -2.070431 |
| 19 | 1 | 0 | 1.719030  | -3.206075 | -2.599651 |
| 20 | 1 | 0 | 1.020290  | -3.812476 | -1.099989 |
| 21 | 6 | 0 | 0.285185  | -1.122396 | 2.399591  |
| 22 | 1 | 0 | -0.472901 | -0.363947 | 2.188225  |
| 23 | 1 | 0 | -0.055704 | -1.731076 | 3.241211  |
| 24 | 1 | 0 | 1.213772  | -0.624040 | 2.696484  |
| 25 | 6 | 0 | -0.847880 | -2.728050 | 0.872381  |
| 26 | 1 | 0 | -1.554684 | -1.972899 | 0.512438  |
| 27 | 1 | 0 | -0.739326 | -3.499017 | 0.106583  |
| 28 | 1 | 0 | -1.242642 | -3.199468 | 1.779660  |
| 29 | 8 | 0 | 0.694791  | 0.024583  | 0.072252  |
| 30 | 6 | 0 | -1.663930 | 0.256794  | -1.472999 |
| 31 | 8 | 0 | -1.320635 | 1.434350  | -1.572792 |
| 32 | 8 | 0 | -2.592106 | -0.068670 | -0.374273 |
| 33 | 8 | 0 | -1.303294 | -0.761176 | -2.081915 |
| 34 | 6 | 0 | -4.623305 | 0.569457  | 1.934456  |
| 35 | 6 | 0 | -4.215729 | 1.390954  | 0.697657  |
| 36 | 6 | 0 | -4.795474 | -0.865061 | -0.506900 |
| 37 | 6 | 0 | -4.468278 | -1.663907 | 0.772764  |
| 38 | 6 | 0 | -3.991642 | -0.817393 | 1.961237  |
| 39 | 1 | 0 | -2.902193 | -0.716667 | 1.928274  |
| 40 | 1 | 0 | -5.714242 | 0.476393  | 1.986490  |
| 41 | 1 | 0 | -3.715470 | -2.423578 | 0.540748  |
| 42 | 1 | 0 | -5.382571 | -2.202997 | 1.050068  |
| 43 | 1 | 0 | -4.243477 | -1.322367 | 2.899717  |
| 44 | 1 | 0 | -4.321906 | 1.144172  | 2.818238  |
| 45 | 7 | 0 | -3.975620 | 0.455856  | -0.546608 |



|    |   |   |           |           |           |
|----|---|---|-----------|-----------|-----------|
| 46 | 6 | 0 | -4.408882 | -1.662820 | -1.747426 |
| 47 | 1 | 0 | -4.750658 | -1.155218 | -2.652433 |
| 48 | 1 | 0 | -3.326245 | -1.796223 | -1.802121 |
| 49 | 1 | 0 | -4.898817 | -2.641002 | -1.687811 |
| 50 | 6 | 0 | -6.283903 | -0.526819 | -0.609861 |
| 51 | 1 | 0 | -6.445057 | 0.183772  | -1.424010 |
| 52 | 1 | 0 | -6.821845 | -1.451462 | -0.843353 |
| 53 | 1 | 0 | -6.710337 | -0.128317 | 0.312419  |
| 54 | 6 | 0 | -2.920366 | 2.153720  | 0.953044  |
| 55 | 1 | 0 | -2.501743 | 2.491116  | 0.003079  |
| 56 | 1 | 0 | -3.144626 | 3.010692  | 1.597828  |
| 57 | 1 | 0 | -2.172844 | 1.526949  | 1.446796  |
| 58 | 6 | 0 | -5.300704 | 2.403695  | 0.338574  |
| 59 | 1 | 0 | -5.495337 | 3.009260  | 1.230643  |
| 60 | 1 | 0 | -4.962248 | 3.056563  | -0.466840 |
| 61 | 1 | 0 | -6.239402 | 1.937018  | 0.039196  |
| 62 | 8 | 0 | -4.142448 | 1.087733  | -1.664627 |
| 63 | 6 | 0 | 1.426914  | 2.582243  | 1.626686  |
| 64 | 6 | 0 | 2.419907  | 1.523453  | 1.215525  |
| 65 | 6 | 0 | 3.039250  | 3.088324  | -0.514968 |
| 66 | 6 | 0 | 1.551617  | 3.102434  | -0.857615 |
| 67 | 1 | 0 | 2.776564  | 0.835345  | 1.984135  |
| 68 | 1 | 0 | 1.595437  | 0.660933  | 0.621980  |
| 69 | 1 | 0 | 1.995505  | 3.375327  | 2.131898  |
| 70 | 1 | 0 | 3.307494  | 3.980929  | 0.066384  |
| 71 | 1 | 0 | 3.656581  | 3.081259  | -1.410708 |
| 72 | 1 | 0 | 1.304483  | 2.198785  | -1.425655 |
| 73 | 1 | 0 | 1.353569  | 3.960418  | -1.506163 |
| 74 | 1 | 0 | 0.738057  | 2.155948  | 2.360354  |
| 75 | 7 | 0 | 3.361180  | 1.906636  | 0.302763  |

|    |   |   |          |           |           |
|----|---|---|----------|-----------|-----------|
| 76 | 6 | 0 | 4.543067 | 1.152806  | 0.099415  |
| 77 | 6 | 0 | 5.164904 | 0.523551  | 1.187314  |
| 78 | 6 | 0 | 5.084072 | 0.994050  | -1.184226 |
| 79 | 6 | 0 | 6.276584 | -0.286704 | 0.984142  |
| 80 | 1 | 0 | 4.792917 | 0.678909  | 2.194665  |
| 81 | 6 | 0 | 6.204574 | 0.191692  | -1.372279 |
| 82 | 1 | 0 | 4.613652 | 1.455855  | -2.045195 |
| 83 | 6 | 0 | 6.799750 | -0.463780 | -0.295739 |
| 84 | 1 | 0 | 6.743512 | -0.768851 | 1.837562  |
| 85 | 1 | 0 | 6.602160 | 0.067319  | -2.374827 |
| 86 | 1 | 0 | 7.668631 | -1.095307 | -0.450646 |
| 87 | 8 | 0 | 0.676548 | 3.152767  | 0.406394  |

-----

### IM1B-CO<sub>3</sub>

Standard orientation:

-----

| Center<br>Number | Atomic<br>Number | Atomic<br>Type | Coordinates (Angstroms) |          |           |
|------------------|------------------|----------------|-------------------------|----------|-----------|
|                  |                  |                | X                       | Y        | Z         |
| 1                | 6                | 0              | 2.730603                | 3.966698 | -0.406927 |
| 2                | 6                | 0              | 2.040069                | 2.679295 | -0.904185 |
| 3                | 6                | 0              | 2.468176                | 1.892039 | 1.483206  |
| 4                | 6                | 0              | 3.668479                | 2.865008 | 1.650117  |
| 5                | 6                | 0              | 4.002864                | 3.643633 | 0.369639  |
| 6                | 1                | 0              | 4.668873                | 3.045500 | -0.263514 |
| 7                | 1                | 0              | 2.048544                | 4.537230 | 0.235586  |
| 8                | 1                | 0              | 4.552975                | 2.300124 | 1.967170  |
| 9                | 1                | 0              | 3.433234                | 3.564340 | 2.461414  |
| 10               | 1                | 0              | 4.545060                | 4.561418 | 0.620599  |
| 11               | 1                | 0              | 2.946683                | 4.601545 | -1.274253 |

|    |   |   |           |           |           |
|----|---|---|-----------|-----------|-----------|
| 12 | 7 | 0 | 2.386189  | 1.584582  | 0.037274  |
| 13 | 6 | 0 | 2.778806  | 0.586371  | 2.220937  |
| 14 | 1 | 0 | 1.911474  | -0.080402 | 2.238243  |
| 15 | 1 | 0 | 3.613991  | 0.063325  | 1.742899  |
| 16 | 1 | 0 | 3.058714  | 0.814471  | 3.255331  |
| 17 | 6 | 0 | 1.187609  | 2.482496  | 2.103540  |
| 18 | 1 | 0 | 0.315030  | 1.865478  | 1.864148  |
| 19 | 1 | 0 | 1.299748  | 2.510751  | 3.194098  |
| 20 | 1 | 0 | 0.996484  | 3.506105  | 1.770087  |
| 21 | 6 | 0 | 2.629096  | 2.267478  | -2.259046 |
| 22 | 1 | 0 | 2.256773  | 1.277015  | -2.540530 |
| 23 | 1 | 0 | 2.341905  | 2.980766  | -3.039530 |
| 24 | 1 | 0 | 3.723445  | 2.226181  | -2.213649 |
| 25 | 6 | 0 | 0.533440  | 2.912842  | -1.083944 |
| 26 | 1 | 0 | 0.387240  | 3.766656  | -1.756361 |
| 27 | 1 | 0 | 0.040845  | 2.040230  | -1.523722 |
| 28 | 1 | 0 | 0.035014  | 3.141719  | -0.138499 |
| 29 | 8 | 0 | 1.587943  | 0.451619  | -0.218008 |
| 30 | 6 | 0 | 0.438788  | -2.126738 | -1.335757 |
| 31 | 6 | 0 | 1.907480  | -1.911367 | -1.293536 |
| 32 | 6 | 0 | 2.037824  | -2.902891 | 0.900293  |
| 33 | 6 | 0 | 0.563551  | -2.543089 | 0.943477  |
| 34 | 1 | 0 | 2.393885  | -1.433849 | -2.139247 |
| 35 | 1 | 0 | 0.634757  | 0.613378  | 0.055255  |
| 36 | 1 | 0 | 0.214677  | -2.641301 | -2.277971 |
| 37 | 1 | 0 | 2.184237  | -3.984671 | 0.853365  |
| 38 | 1 | 0 | 2.579548  | -2.498859 | 1.757853  |
| 39 | 1 | 0 | 0.422459  | -1.467795 | 1.111534  |
| 40 | 1 | 0 | 0.072524  | -3.106204 | 1.739174  |
| 41 | 1 | 0 | -0.049954 | -1.136554 | -1.379952 |

|    |   |   |           |           |           |
|----|---|---|-----------|-----------|-----------|
| 42 | 7 | 0 | 2.643523  | -2.304579 | -0.315928 |
| 43 | 6 | 0 | 4.069281  | -2.085233 | -0.323383 |
| 44 | 6 | 0 | 4.554650  | -0.821586 | -0.648359 |
| 45 | 6 | 0 | 4.914685  | -3.138431 | 0.012735  |
| 46 | 6 | 0 | 5.933036  | -0.620855 | -0.655770 |
| 47 | 1 | 0 | 3.860817  | -0.004089 | -0.835194 |
| 48 | 6 | 0 | 6.289365  | -2.919153 | 0.000265  |
| 49 | 1 | 0 | 4.508935  | -4.113755 | 0.262921  |
| 50 | 6 | 0 | 6.798724  | -1.665285 | -0.335996 |
| 51 | 1 | 0 | 6.326703  | 0.361128  | -0.900027 |
| 52 | 1 | 0 | 6.961802  | -3.733250 | 0.250518  |
| 53 | 1 | 0 | 7.871665  | -1.501037 | -0.340886 |
| 54 | 6 | 0 | -1.808742 | 0.395482  | -0.325690 |
| 55 | 8 | 0 | -0.929731 | 0.428155  | 0.584583  |
| 56 | 8 | 0 | -3.090926 | 0.540517  | 0.196018  |
| 57 | 8 | 0 | -1.639804 | 0.317116  | -1.547251 |
| 58 | 6 | 0 | -6.194531 | 1.025460  | 0.090962  |
| 59 | 6 | 0 | -5.267578 | 0.421823  | -0.977843 |
| 60 | 6 | 0 | -4.557946 | -1.090829 | 1.068415  |
| 61 | 6 | 0 | -4.947767 | 0.029274  | 2.055547  |
| 62 | 6 | 0 | -5.485768 | 1.315573  | 1.408651  |
| 63 | 1 | 0 | -4.658903 | 2.006811  | 1.226454  |
| 64 | 1 | 0 | -7.045955 | 0.358691  | 0.269583  |
| 65 | 1 | 0 | -4.081654 | 0.274500  | 2.676249  |
| 66 | 1 | 0 | -5.708948 | -0.393682 | 2.722127  |
| 67 | 1 | 0 | -6.179166 | 1.810145  | 2.096405  |
| 68 | 1 | 0 | -6.609948 | 1.948599  | -0.329838 |
| 69 | 7 | 0 | -4.181242 | -0.498379 | -0.317776 |
| 70 | 6 | 0 | -3.335859 | -1.855139 | 1.569303  |
| 71 | 1 | 0 | -3.089943 | -2.677388 | 0.893724  |

|    |   |   |           |           |           |
|----|---|---|-----------|-----------|-----------|
| 72 | 1 | 0 | -2.472804 | -1.191759 | 1.662502  |
| 73 | 1 | 0 | -3.575047 | -2.268563 | 2.554806  |
| 74 | 6 | 0 | -5.695724 | -2.092422 | 0.854971  |
| 75 | 1 | 0 | -5.448949 | -2.775294 | 0.038197  |
| 76 | 1 | 0 | -5.804014 | -2.675814 | 1.774710  |
| 77 | 1 | 0 | -6.658982 | -1.619625 | 0.654639  |
| 78 | 6 | 0 | -4.542871 | 1.507396  | -1.766993 |
| 79 | 1 | 0 | -3.688629 | 1.074165  | -2.292392 |
| 80 | 1 | 0 | -5.247179 | 1.935057  | -2.488406 |
| 81 | 1 | 0 | -4.178715 | 2.306233  | -1.117193 |
| 82 | 6 | 0 | -6.066194 | -0.437815 | -1.956377 |
| 83 | 1 | 0 | -6.869601 | 0.186222  | -2.361886 |
| 84 | 1 | 0 | -5.433660 | -0.777127 | -2.777948 |
| 85 | 1 | 0 | -6.522652 | -1.307676 | -1.481438 |
| 86 | 8 | 0 | -3.726222 | -1.367371 | -1.113599 |
| 87 | 8 | 0 | -0.036748 | -2.925118 | -0.283201 |

---

## X. References

- 1 B. Xu, Y. Shang, X. Jie, X. Zhang, J. Kan, S. L. Yedage and W. Su, *Green Chem.*, 2020, **22**, 1827–1831.
- 2 (a) Y. He, F. Wang, X. Zhang and X. Fan, *Chem. Commun.*, 2017, **53**, 4002–4005; (b) F. Wang, Y. He, M. Tian, X. Zhang and X. Fan, *Org. Lett.*, 2018, **20**, 864–867.
- 3 V. P. Sheverdov, O. V. Ershov, O. E. Nasakin, A. N. Chernushkin, V. A. Tafeenko and S. I. Firgang, *Tetrahedron*, 2001, **57**, 5815–5824.
- 4 M. J. Frisch, G. W. Trucks, H. B. Schlegel, G. E. Scuseria, M. A. Robb, J. R. Cheeseman, G. Scalmani, V. Barone, G. A. Petersson, H. Nakatsuji, X. Li, M. Caricato, A. V. Marenich, J. Bloino, B. G. Janesko, R. Gomperts, B. Mennucci, H. P. Hratchian, J. V. Ortiz, A. F. Izmaylov, J. L. Sonnenberg, Williams, F. Ding, F. Lipparini, F. Egidi, J. Goings, B. Peng, A. Petrone, T. Henderson, D. Ranasinghe, V. G. Zakrzewski, J. Gao, N. Rega, G. Zheng, W. Liang, M. Hada, M. Ehara, K. Toyota, R. Fukuda, J. Hasegawa, M. Ishida, T. Nakajima, Y. Honda, O. Kitao, H. Nakai, T. Vreven, K. Throssell, J. A. Montgomery Jr., J. E. Peralta, F. Ogliaro, M. J. Bearpark, J. J. Heyd, E. N. Brothers, K. N. Kudin, V. N. Staroverov, T. A. Keith, R. Kobayashi, J. Normand, K. Raghavachari, A. P. Rendell, J. C. Burant, S. S. Iyengar, J. Tomasi, M. Cossi, J. M. Millam, M. Klene, C. Adamo, R. Cammi, J. W. Ochterski, R. L. Martin, K. Morokuma, O. Farkas, J. B. Foresman and D. J. Fox, *Gaussian 16 A. 03*. Wallingford, CT, 2016.
- 5 S. Grimme, S. Ehrlich and L. Goerigk, *Comput. Chem.*, 2011, **32**, 1456–1465.
- 6 Y. Zhao and D. G. Truhlar, *Theor. Chem. Acc.*, 2008, **120**, 215–241.
- 7 M. Bursch, J.-M. Mewes, A. Hansen and S. Grimme, *Angew. Chem. Int. Ed.*, 2022, **61**, e202205735.

- 8 A. V. Marenich, C. J. Cramer and D. G. Truhlar, *J. Phys. Chem. B*, 2009, **113**, 6378–6396.
- 9 K. Fukui, *Acc. Chem. Res.*, 1981, **14**, 363–368.
- 10 Semichem, Inc., GaussView 6.0.16 program: <http://gaussian.com/gaussview6/> (accessed on Nov 25, 2019).
